# Supplementary material for: Medical Informatics Platform (MIP): A Pilot Study Across Clinical Italian Cohorts
Source: Front Neurol. 2020 Sep 23;11:1021. doi: 10.3389/fneur.2020.01021 (PMC7538836; doi:10.3389/fneur.2020.01021)
Supplement: Supplementary file 3 [file Table_3.xlsx]

## Sheet: Group_analysis_UNNORMLSED
Clusters	RH_Hippocampus	LH_Hippocampus	RH_Amygdala	LH_Amygdala	RH_Middlecingulate_Gyrus	LH_Middlecingulate_Gyrus	RH_Anteriorcingulate_Gyrus	LH_Anteriorcingulate_Gyrus	RH_Posteriorcingulate_Gyrus	LH_Posteriorcingulate_Gyrus	RH_Thalamusproper	LH_Thalamusproper	LH_ventraldc	LH_Basalforebrain	RH_Basalforebrain	RH_Ententorhinal	LH_Ententorhinal	RH_Fusiform_Gyrus	LH_Fusiform_Gyrus	RH_Gyrus_Rectus	LH_Inferioroccipital_Gyrus	RH_Inferiortemporal_Gyrus	LH_Inferiortemporal_Gyrus	RH_Middletemporal_Gyrus	LH_Middletemporal_Gyrus	LH_Occipitalfusiform_Gyrus	RH_Parahippocampal_gyrus	LH_Parahippocampal_gyrus	LH_Supplementarymotorcortex	RH_Temporalpole	LH_Temporalpole	MMSE	AB1-42	T-TAU	3rd_Ventricle	4th_Ventricle
cluster1	2.41594	2.05577	0.436928	0.384863	3.49091	3.77119	3.54028	3.7027	3.35664	3.95343	3.76774	4.0835	3.53633	0.217581	0.236872	0.845174	0.728574	5.33488	5.03679	1.3957	4.91119	7.04841	7.19471	8.30474	9.154	3.11704	2.50113	2.49142	3.66258	5.15525	4.67393	17.8716	-0.836354	0.821293	4.08847	2.74715
cluster2	2.51336	2.1873	0.566898	0.519855	4.25777	4.18518	3.63993	3.8312	3.42101	3.71536	5.28078	5.4132	4.33977	0.285862	0.303664	1.09423	1.02835	5.46767	5.04155	1.82704	4.42889	8.02099	7.13062	8.89101	8.46437	3.04737	2.36382	2.5295	4.77386	5.75903	5.44935	21.0145	-0.812781	0.770759	2.62338	2.02384
cluster3	3.19036	3.02882	0.759881	0.781146	3.95621	4.22369	3.84032	3.99441	3.67205	4.05653	4.90035	5.0795	4.3274	0.297224	0.308285	1.47968	1.48014	6.28905	6.05479	1.56033	5.71896	9.91777	9.55652	11.6208	11.0782	3.5297	3.02779	3.36397	4.07757	6.67016	6.75768	23.8716	-0.836354	0.821293	2.97699	2.59212
cluster2	2.45312	2.35557	0.482879	0.412297	3.28929	3.32988	2.90426	3.17672	3.1217	3.32787	5.06985	5.52786	4.51079	0.249028	0.251579	0.943103	0.864341	5.15798	4.64486	1.26971	4.87682	7.46274	6.82061	8.89747	8.11361	3.18901	2.53584	2.85572	3.20099	4.89868	4.73786	9.95735	-0.82221	0.790973	3.0697	2.74444
cluster1	2.052	1.62144	0.428261	0.247743	3.46077	3.3062	3.58105	3.49713	3.1002	3.40043	3.91839	3.74059	3.74927	0.218289	0.253362	0.895774	0.573851	4.86184	3.5277	1.16286	3.95319	7.04466	5.60316	8.82615	7.36884	2.28952	2.22027	2.34845	3.5906	5.15924	3.98632	26.8431	-0.841069	0.8314	3.07798	2.79864
cluster1	2.14091	2.0438	0.457212	0.478122	3.38299	3.75879	3.19419	3.54254	3.0537	3.40949	3.91349	4.10779	3.85482	0.240261	0.224947	0.871174	0.974476	4.70901	4.66197	1.2896	3.95384	7.13635	7.51355	8.75844	9.36312	2.85059	2.13805	2.69782	3.54923	5.5728	5.8795	20.8145	-0.845784	0.841506	2.9445	2.37048
cluster2	2.22119	2.18455	0.469899	0.503739	4.26232	4.18224	4.01572	3.99594	3.35151	3.79353	4.66395	5.13117	4.20595	0.279945	0.283623	0.921585	1.08791	5.80893	5.68137	1.36887	5.62583	8.79451	8.77836	10.8276	11.1363	3.51073	2.42005	2.85741	4.33786	5.76195	6.22152	24.9145	-0.829282	0.806133	2.99236	2.78644
cluster1	2.05486	1.75137	0.401484	0.350007	3.79903	4.31127	3.7577	3.96961	3.24206	3.40407	4.67697	4.88866	4.07968	0.26763	0.253954	0.792765	0.739925	5.72106	5.15038	1.53759	4.11337	7.59876	7.16248	8.56637	8.35855	3.19273	2.29683	2.5716	4.10476	5.40356	5.58489	16.9288	-0.826925	0.80108	3.01829	2.61721
cluster2	2.70544	2.31838	0.582876	0.53258	3.71873	3.77825	3.57855	3.77864	3.44272	3.7752	5.44014	5.471	4.40562	0.290677	0.286668	1.24643	1.12966	5.5474	5.23649	1.38877	4.57223	8.23057	7.55015	10.5843	9.68593	2.85865	2.59917	2.91737	4.1305	6.46878	6.23383	18.1859	-0.784492	0.710119	2.24044	2.33764
cluster4	2.50639	2.34587	0.543421	0.559407	4.12952	4.10868	3.73351	3.76036	3.54773	3.7416	4.2315	4.43335	4.03421	0.271695	0.288226	1.13894	1.05149	5.24494	4.64617	1.47624	4.95334	8.22611	7.96207	10.6717	10.5215	2.86455	2.52568	2.6915	3.99375	6.26341	6.05025	14.8574	-0.838712	0.826346	3.31509	2.61939
cluster2	2.41618	2.26205	0.559261	0.578615	3.62308	3.98534	3.32653	3.60307	2.96669	3.31161	4.32993	4.51729	4.2484	0.300905	0.257325	1.04453	1.07311	5.1704	5.12983	1.64535	4.70083	7.29639	7.83075	8.63855	9.86387	3.08239	2.42534	2.72066	3.64665	5.91472	5.88664	20.9431	-0.824567	0.796026	3.26613	2.22263
cluster2	2.29386	2.25523	0.557193	0.559315	3.6958	3.87099	3.79577	3.80493	3.1635	3.76064	4.55352	4.91269	3.96258	0.280379	0.28409	1.08409	1.07742	5.35376	5.24914	1.24167	4.88735	7.67093	7.69996	9.37524	9.60722	3.20566	2.27713	2.62348	3.8224	5.88372	5.7194	23.9288	-0.826925	0.80108	3.8634	3.561
cluster2	2.2477	2.23208	0.535174	0.572259	3.25663	3.49779	3.37471	3.61147	3.47962	3.96252	4.06666	4.44394	4.04286	0.254672	0.235625	1.0574	1.19214	5.20689	4.85926	1.27791	4.98247	8.1641	7.56167	9.93014	8.82299	3.16783	2.28828	2.71141	3.81005	6.26671	6.11437	21.8859	-0.833997	0.81624	3.89677	2.5067
cluster1	2.02137	1.82273	0.491218	0.409819	3.62127	3.65592	3.42935	3.62495	3.10765	3.46734	4.52979	4.52364	3.87158	0.230234	0.250349	0.880469	0.721945	4.81536	4.65725	1.26614	3.94905	8.14012	7.39018	10.3329	9.84985	3.07234	2.17174	2.36897	4.09973	6.41677	5.50452	14.9145	-0.829282	0.806133	3.11688	2.69704
cluster5	2.84473	2.76743	0.559091	0.585016	3.4788	4.17887	3.33977	3.8745	3.60037	4.18343	4.3611	4.82515	4.14966	0.296475	0.262997	1.11427	1.13055	5.04267	5.27926	1.4023	4.74731	7.31715	7.99584	8.71288	10.3504	3.13349	2.57931	3.05542	4.05133	5.37101	5.93679	10.9431	-0.824567	0.796026	3.73491	2.55129
cluster4	2.48206	2.31961	0.609373	0.63385	4.30455	4.62098	4.16948	4.52038	3.74415	4.04663	4.96028	5.07878	4.18793	0.303491	0.298626	1.27424	1.32837	5.66632	5.57009	1.68442	5.14309	8.97922	9.06115	12.1587	11.3206	3.21417	2.67363	2.89449	5.37229	6.65432	6.22829	22.9716	-0.819853	0.78592	3.01805	2.31592
cluster2	2.36299	2.18741	0.487676	0.467488	3.61828	3.8792	3.76241	3.5666	3.24603	3.51106	4.73177	5.03535	4.39981	0.238391	0.239138	0.878026	0.907744	5.29254	5.28461	1.33207	5.36528	7.40042	7.32676	8.3191	8.19181	3.55694	2.07406	2.49225	4.11481	5.18033	5.17925	21.0716	-0.803351	0.750546	3.48025	2.52465
cluster1	1.92368	1.89988	0.431787	0.425827	4.23375	4.36486	3.80879	4.1069	3.49766	4.19622	3.5773	4.09144	3.8979	0.263611	0.268341	0.862403	0.814404	5.44303	4.82698	1.4819	4.52043	8.41859	7.79892	8.85582	8.72254	2.98924	2.11891	2.40166	4.17983	4.78342	5.47911	21.786	-0.850498	0.851613	4.09182	2.01459
cluster2	2.39322	2.15512	0.491976	0.445907	3.53866	4.15386	3.67356	3.92456	3.34475	3.75055	3.68023	3.844	4.01827	0.235336	0.255636	0.966684	0.928798	5.50455	4.70993	1.26084	4.25894	8.58824	7.41157	10.0159	9.12126	2.98652	2.41403	2.62246	3.8857	5.92443	5.53486	22.8431	-0.841069	0.8314	3.57443	2.71622
cluster2	2.27476	2.20828	0.471214	0.53118	3.56362	4.06332	3.75148	4.11663	3.28343	3.72556	4.85351	5.42082	4.23395	0.303047	0.270082	0.943279	1.00672	4.4499	4.64048	1.34964	5.08432	6.32777	6.95707	7.54713	9.01677	3.21251	2.24628	2.57679	3.96763	5.03424	5.82316	18.1002	-0.798636	0.740439	2.69031	2.58238
cluster5	2.67665	2.60237	0.581508	0.613696	4.49074	4.57367	3.6917	4.11029	3.52951	4.13502	4.77798	5.02928	3.82319	0.296374	0.299871	1.16554	1.21321	5.57462	5.38083	1.55379	4.46326	8.76152	8.32159	10.6038	10.1865	2.85556	2.42337	2.86187	4.45257	6.44279	6.67554	14.0573	-0.805709	0.755599	3.24202	3.12492
cluster1	2.33003	2.00172	0.506631	0.4043	3.60995	3.58859	3.85857	3.86078	3.05311	3.62756	3.92989	4.20078	4.11216	0.25294	0.25574	0.934136	0.753746	4.53915	4.28893	1.35075	4.82335	6.67278	6.09515	8.04465	7.48828	3.18618	1.96901	2.3119	3.61178	4.81017	4.59097	22.9573	-0.82221	0.790973	3.52532	2.29318
cluster2	2.31235	2.22562	0.43558	0.532477	3.97293	4.03148	3.83376	3.83233	3.24796	3.42663	3.95328	4.1818	3.95995	0.27097	0.271374	0.803652	1.04453	5.57869	5.17854	1.27602	4.63274	7.91428	7.81797	9.30008	9.9355	2.74128	2.20492	2.67308	4.14532	5.1929	5.87567	15.9002	-0.83164	0.811186	4.09605	4.04192
cluster1	1.9324	1.92946	0.347349	0.423415	3.34656	3.39892	3.13632	3.41614	2.79859	2.96492	3.52389	3.4051	3.6761	0.218333	0.207542	0.611576	0.848555	4.26952	3.92578	1.09312	3.44623	6.75565	6.79147	8.68825	8.75474	2.18377	2.03708	2.42313	3.32787	5.07099	5.80066	14.7145	-0.862285	0.87688	3.79146	2.65922
cluster1	1.70524	1.64371	0.349561	0.370308	3.66311	4.01349	3.75785	3.62702	3.25545	3.75096	3.61709	3.8153	3.79635	0.227812	0.240558	0.70314	0.702485	4.57205	4.61007	1.22337	4.21611	6.48715	6.71561	8.95301	8.22525	3.01119	2.02565	2.37716	3.79743	4.7891	5.32965	19.7003	-0.864643	0.881933	3.65764	2.68138
cluster1	1.92318	1.65141	0.343278	0.296781	3.31939	3.65041	3.09588	3.33411	3.35333	3.59513	3.94653	4.00816	3.74023	0.193014	0.193791	0.608109	0.589625	3.84251	3.8874	1.04023	4.17468	5.06461	5.08773	5.7834	6.04592	2.6206	1.74313	2.10097	3.78308	4.12307	3.99873	18.9716	-0.819853	0.78592	3.09534	3.25774
cluster5	2.75676	2.63668	0.641313	0.663258	3.94186	4.29752	3.74865	4.10539	3.55717	3.87919	4.96768	5.20626	4.10267	0.298139	0.291621	1.21742	1.28483	5.46742	5.26491	1.58722	5.03962	8.69328	8.43773	10.6389	10.9805	3.2513	2.59887	3.04311	3.9951	6.78696	6.7512	18.9145	-0.829282	0.806133	3.45187	2.76986
cluster1	1.93107	1.77412	0.453808	0.358556	3.23948	3.32251	2.97292	3.06291	3.07446	3.38277	4.02431	3.87904	3.77458	0.216452	0.242805	0.82472	0.676247	4.57135	4.08693	1.01266	4.60303	6.65117	6.04307	8.11692	7.98469	2.77671	2.09738	2.32749	3.01048	4.54769	4.17645	18.8859	-0.833997	0.81624	3.42988	3.10705
cluster5	2.97969	2.80022	0.707373	0.675614	4.31614	4.5009	4.14911	4.45266	3.42875	3.79689	5.29878	5.78863	4.23331	0.340205	0.342207	1.32137	1.22792	6.71616	6.19048	1.90047	4.91359	9.05472	9.23553	11.0309	10.9693	3.33026	2.52169	2.86856	4.93773	6.76768	6.2197	23.2287	-0.77742	0.694959	2.74656	1.99556
cluster1	2.24228	1.99473	0.572544	0.481725	3.20272	3.58399	2.99354	3.29576	2.79138	3.002	4.73591	4.90599	4.14527	0.258303	0.237562	1.10996	0.970711	4.63661	4.65292	1.26287	4.24789	6.27719	6.95338	8.03698	8.80738	2.65571	2.49543	2.56945	2.95767	5.00699	4.88756	17.9431	-0.824567	0.796026	2.9413	2.4658
cluster4	2.41337	2.34407	0.591285	0.642759	3.82258	3.93466	3.82174	4.29002	3.31492	4.03622	4.22892	4.67347	4.00816	0.291927	0.289578	1.01275	1.10981	4.4964	5.29234	1.60149	4.7936	6.83565	8.47172	8.25295	10.044	2.96287	2.01796	2.60463	4.07568	5.44859	5.43849	19.0716	-0.803351	0.750546	3.58058	2.20636
cluster2	2.36951	2.20646	0.599698	0.567596	3.4201	3.88043	4.12503	4.12012	2.74942	3.3762	3.90974	4.33412	3.97381	0.30718	0.310544	1.07074	1.05267	4.72048	4.38145	1.46077	3.18263	6.98703	6.56786	8.39985	9.01039	2.29307	2.33709	2.66851	3.9323	5.82695	5.25044	15.0145	-0.812781	0.770759	3.19868	2.53726
cluster4	2.67103	2.36921	0.597695	0.547091	3.98406	3.97615	4.04353	3.97095	2.78419	3.07648	5.32783	5.46668	4.24614	0.283228	0.298235	1.23451	1.14956	6.03213	5.34745	1.80858	4.2319	8.96527	7.93292	9.77417	9.45806	2.87643	2.49588	2.78235	4.32768	6.97088	6.34182	12.1859	-0.784492	0.710119	2.46198	2.09869
cluster2	2.20454	2.33014	0.474332	0.569018	3.8267	3.95612	3.92708	3.89096	3.39262	3.58413	4.28477	4.62406	4.02133	0.296415	0.276919	0.999012	1.169	5.4715	5.43022	1.43999	4.63486	8.68556	8.26096	10.1401	9.77049	3.17413	2.29562	2.84006	4.00801	5.89393	6.191	20.286	-0.850498	0.851613	3.73235	2.72012
cluster1	2.06177	1.79457	0.338432	0.300606	3.40976	3.61367	3.50888	3.4095	3.2244	3.48484	3.10492	3.29777	3.55852	0.185989	0.197982	0.727842	0.648748	4.74999	4.23606	1.12848	4.35778	6.60112	5.93263	7.59467	7.05505	2.85688	2.16156	2.59808	3.21233	4.06301	3.75481	20.3431	-0.841069	0.8314	3.30764	2.76013
cluster4	2.41271	2.44132	0.579806	0.611239	3.47555	3.59762	4.03863	3.88564	2.9528	3.86634	4.58231	5.013	4.36549	0.300645	0.322078	1.18889	1.21951	6.3091	5.95431	1.69776	4.94926	9.56764	9.49253	10.9739	11.0183	3.40799	2.56192	2.95097	4.51369	5.95029	5.87371	27.0288	-0.810423	0.765706	3.4619	2.85571
cluster3	2.27538	2.86114	0.546689	0.812509	3.63184	3.94924	3.68785	3.68157	3.35983	3.72125	4.46575	4.7322	4.07876	0.262488	0.252451	1.07295	1.7726	5.37884	5.43976	1.4288	3.73239	7.03874	6.86982	7.69081	6.53924	2.84173	2.30314	3.47943	3.66348	5.14885	5.74469	12.9573	0.293446	2.37592	2.72514	2.5425
cluster5	2.8038	2.61678	0.711839	0.755583	4.64472	4.47547	4.71196	4.64208	3.464	3.77928	5.42967	5.46803	4.45406	0.346546	0.339598	1.3763	1.4792	6.58282	6.08946	1.87376	5.19188	10.0731	9.20876	11.6965	10.7307	3.5472	2.67834	3.15833	4.56136	6.87593	7.12181	27.9716	-0.819853	0.78592	2.88893	2.287
cluster4	2.64649	2.44897	0.579751	0.592252	3.72375	4.00936	3.73672	4.23007	3.73923	4.02077	5.2817	5.32893	4.35148	0.328902	0.326042	1.1178	1.16967	5.61113	5.49261	1.7955	4.03133	8.65692	8.61327	10.7483	10.4456	2.85076	2.52915	2.93488	4.66494	6.78602	6.854	27.0716	-0.803351	0.750546	2.9186	2.54627
cluster5	2.76234	2.76161	0.607359	0.66639	3.60135	3.77809	3.82027	3.9478	3.35919	4.49234	5.07951	5.3734	4.73509	0.31937	0.298762	1.09069	1.20218	4.77822	4.99679	1.58584	4.27659	6.89503	6.90041	8.58738	10.0915	3.1191	2.41427	2.97886	4.40061	4.93334	5.5412	15.9145	-0.829282	0.806133	3.15347	3.08657
cluster3	3.2373	2.89866	0.781426	0.754267	3.85508	3.85065	3.93978	4.1031	3.34738	3.62051	6.89111	6.12041	4.78062	0.351288	0.383896	1.46277	1.3643	6.84856	5.73684	2.0272	5.10378	9.58758	7.94217	11.4275	8.97856	3.93293	2.86031	3.13776	4.41878	7.27474	6.73389	12.3716	-0.753847	0.644426	2.26279	2.10933
cluster5	2.794	2.618	0.667869	0.626164	4.18176	5.0353	3.93309	4.5333	3.4211	3.77552	5.47491	5.85024	4.03614	0.342597	0.354836	1.31292	1.26955	5.85532	5.82013	2.02388	4.96215	8.11485	8.46162	9.56104	10.1492	3.25745	2.71465	3.04215	5.66734	6.91777	6.84695	13.1287	-0.793922	0.730333	2.34238	1.56877
cluster4	2.68315	2.35727	0.619096	0.554509	4.34607	4.69505	4.00265	4.69273	3.97421	4.36518	4.75184	4.99985	4.27176	0.323481	0.317892	1.2799	1.17972	6.93421	6.2056	2.00221	5.79245	11.087	9.9899	14.2249	13.6003	3.7406	2.80613	2.94434	4.98165	7.86842	7.06103	24.0716	-0.803351	0.750546	2.32502	1.93469
cluster5	2.86622	2.59687	0.713149	0.680392	3.85899	3.62509	3.96635	3.99272	3.48446	3.73421	5.06982	5.09718	4.155	0.276403	0.307335	1.47151	1.36467	6.75096	6.19711	1.69995	5.44367	10.1348	9.10577	11.5551	9.83925	3.65079	2.90108	2.98985	4.67564	7.14275	7.10062	15.043	-0.808066	0.760653	3.06265	2.56309
cluster4	2.63054	2.54508	0.651609	0.707024	4.23312	4.39627	3.5686	3.88866	3.38692	3.98149	5.22643	5.50171	4.2131	0.322195	0.320361	1.23273	1.33667	5.98449	6.38976	1.80061	5.23637	8.48454	9.50678	10.2758	10.8781	3.93877	2.66283	3.01798	5.12436	6.90813	7.46526	21.9859	-0.817495	0.780866	2.97651	2.29006
cluster2	2.3139	2.34158	0.507984	0.561257	3.77712	4.19161	3.67905	3.82277	3.31182	4.13978	4.40346	4.71789	3.91527	0.303125	0.279219	0.951371	1.14268	5.47049	5.30161	1.42785	4.74737	7.40628	8.03065	7.71898	9.08157	3.04812	2.50372	2.94239	3.79146	5.05264	5.6116	18.0859	-0.800994	0.745493	3.82923	2.39573
cluster2	2.64667	2.13536	0.485477	0.572539	3.83723	4.2742	3.66381	4.18221	3.76224	4.03083	4.80685	4.82392	3.97807	0.334918	0.314703	0.909695	1.14404	6.14169	5.54628	1.83759	5.17782	9.94948	9.50347	11.9677	12.3074	3.41351	2.60178	3.03153	4.29608	6.57981	7.10406	20.3574	-0.838712	0.826346	4.07854	3.38395
cluster4	2.696	2.50262	0.62659	0.622227	4.2115	4.13227	3.83687	3.95938	3.41319	3.72652	5.23129	5.28349	4.05396	0.322541	0.323364	1.22655	1.23128	5.95515	5.76102	1.73366	4.26849	8.8914	8.07385	11.1359	10.9338	3.23678	2.69332	3.071	4.23866	6.45074	6.55546	26.8574	-0.838712	0.826346	2.75557	2.53315
cluster3	3.32153	3.03696	0.702628	0.709886	4.35074	4.41311	4.57954	4.60849	3.48521	3.77464	5.5059	5.91813	4.93186	0.346419	0.334496	1.26514	1.30483	5.49762	5.70277	1.74728	4.97457	7.87071	7.68214	9.62247	9.57332	3.55423	2.72804	3.24011	4.62557	5.90922	6.27493	13.0288	-0.810423	0.765706	3.31698	2.44235
cluster2	2.13488	2.22224	0.455791	0.537521	3.54049	3.82125	3.42824	3.81518	3.01182	3.20233	4.11227	4.58642	4.19702	0.260777	0.254826	0.92728	1.02242	5.00602	4.64899	1.27684	4.24673	7.19961	6.42764	8.6024	7.53536	2.73894	2.28995	2.61228	3.22221	5.46181	5.63643	16.7717	-0.852856	0.856666	3.08096	2.54445
cluster4	2.52182	2.39118	0.616737	0.588101	4.00644	4.12709	3.85789	4.1046	3.4057	3.79114	5.03564	5.3177	4.23991	0.285654	0.302999	1.1821	1.19833	5.94827	5.12203	1.77617	5.06762	8.78444	7.86331	10.9644	10.1767	3.35169	2.61731	2.96949	4.08896	5.93794	5.93249	23.8288	-0.843426	0.836453	3.77318	2.08938
cluster5	3.06657	2.55875	0.866888	0.714807	3.98925	3.98538	3.84637	3.67184	3.71349	3.85204	5.69981	5.64889	4.46091	0.326681	0.349304	1.59899	1.34376	6.54028	5.55337	1.64206	5.33943	10.0805	8.60265	11.8143	9.96174	3.52218	2.75362	2.88149	4.24102	7.20401	6.55956	20.4573	-0.82221	0.790973	2.56619	2.0863
cluster5	2.8592	2.71531	0.659285	0.677723	4.30834	4.53321	4.43219	4.21648	3.56082	3.88962	5.43595	5.679	4.20543	0.340872	0.311806	1.24592	1.23314	6.40829	5.90823	1.66029	4.90619	7.97978	8.47886	9.39651	9.3377	3.55539	2.64889	2.94987	4.38805	6.03292	6.32839	24.1573	-0.789207	0.720226	2.19939	1.92248
cluster4	2.80205	2.45362	0.638538	0.529982	3.77313	4.06802	3.7502	3.83008	3.63073	3.83572	5.44505	5.43925	4.31406	0.32098	0.355201	1.44479	1.18417	6.04291	5.39404	1.86046	4.11952	8.94062	7.33593	11.1169	8.63741	3.09977	2.94587	3.11198	4.69609	6.9148	6.32912	4.08589	-0.800994	0.745493	2.43973	2.90737
cluster4	2.33152	2.38108	0.57228	0.636726	3.37608	3.82555	3.82396	4.19002	3.23771	3.81338	4.5852	4.81978	3.72518	0.343216	0.324352	1.16217	1.33744	5.94899	6.27409	1.87037	5.48109	9.15326	9.85971	11.1333	12.3743	3.63948	2.48796	2.94744	4.3259	6.84181	6.6204	25.2002	-0.782135	0.705066	2.74567	2.38531
cluster4	3.0104	2.44123	0.668043	0.589171	3.85514	4.14421	3.47852	4.06926	3.43253	3.46085	5.06667	4.95682	4.21088	0.324981	0.329746	1.353	1.23928	6.47816	6.04617	1.56304	4.97068	9.6889	8.6799	11.6336	11.2596	3.28558	2.81299	2.96059	4.51776	6.672	6.70666	17.0145	-0.812781	0.770759	2.8675	3.90483
cluster2	2.28807	2.24747	0.507448	0.508558	3.28996	3.19897	3.92268	3.8761	2.97084	3.35756	4.31851	4.67915	3.79904	0.2474	0.24514	1.02455	1.04674	5.80868	5.32135	1.43871	4.75896	8.52556	8.51635	10.4175	10.4549	3.05441	2.20639	2.5909	3.94867	6.11639	5.93375	20.4859	-0.817495	0.780866	3.31001	2.26025
cluster2	2.33837	2.28926	0.535858	0.523125	2.70448	3.11303	3.30932	3.32295	2.72235	3.23405	4.09777	4.42496	4.12091	0.235858	0.252876	1.02346	1.02474	5.14621	4.73551	1.27476	5.03511	7.28422	7.15216	9.26587	9.0869	2.9824	2.30866	2.73568	3.06605	5.72743	5.68697	20.286	-0.850498	0.851613	4.42449	3.51622
cluster5	2.81717	2.61049	0.61773	0.599535	4.22791	4.54065	4.00996	4.5799	3.57233	4.06035	6.07226	6.3183	4.52881	0.34819	0.347337	1.26935	1.24921	6.47812	6.3802	1.93997	5.26003	8.94001	9.42712	10.6424	11.4448	3.5188	2.65898	2.95143	5.18901	6.84802	7.0661	9.15731	-0.789207	0.720226	3.07468	2.67495
cluster5	2.97685	2.55999	0.754127	0.695965	4.31161	4.14569	3.87348	3.98551	3.85748	4.02086	5.89866	5.92895	4.49007	0.390216	0.398301	1.5507	1.34902	7.1481	6.60913	2.04575	5.16089	10.1707	9.50216	12.2761	11.2984	3.60872	3.32181	3.33622	4.67468	7.72725	7.27791	15.9431	-0.824567	0.796026	2.46026	1.90292
cluster4	2.94623	2.5498	0.610493	0.535899	3.73049	3.91901	3.99936	4.02355	3.78599	4.09576	4.88737	4.70567	3.80556	0.297228	0.308933	1.21196	1.0775	6.01548	5.07351	1.61085	5.04609	9.28993	7.66998	11.3234	8.37431	3.3948	2.68648	2.76166	4.38776	6.32121	5.63385	20.4859	-0.817495	0.780866	3.37398	2.13055
cluster2	2.2539	2.123	0.536974	0.539417	3.86512	4.05019	3.57946	3.68522	3.5999	3.77199	4.89153	4.91098	4.04499	0.306125	0.307874	1.13224	1.12746	6.64026	6.26946	1.54906	4.77879	9.00674	9.07242	10.6154	9.73827	3.76119	2.72016	2.96749	4.41799	6.36627	6.74296	18.0002	-0.815138	0.775813	2.88208	3.18095
cluster1	2.2124	2.02771	0.519514	0.501798	4.29836	4.20026	3.99469	3.69081	3.59631	3.78607	5.31845	5.45326	4.22886	0.303996	0.314924	1.10034	1.10763	5.92943	5.99036	1.51727	4.70727	8.8161	8.77982	11.0494	9.90988	3.40568	2.5401	2.94295	4.33857	6.20595	6.73286	24.786	-0.850498	0.851613	3.30413	2.37191
cluster5	2.70643	2.56995	0.709327	0.697907	3.93604	3.93134	4.08555	4.30859	3.46829	3.91912	4.61219	4.56683	3.89375	0.365566	0.339372	1.44031	1.36715	6.34276	6.1671	1.88873	5.22759	9.41412	9.55984	11.9838	12.4171	3.49268	2.85568	3.1687	4.03763	6.63165	6.44648	20.9573	-0.82221	0.790973	3.50152	2.64303
cluster4	2.54427	2.37607	0.623005	0.624502	4.18692	3.9865	4.44647	4.14414	3.62041	4.0447	4.03989	4.37702	3.64308	0.318429	0.305326	1.23814	1.19738	5.98727	5.95983	1.48874	5.35783	8.65488	8.89094	10.1252	11.0591	3.56701	2.61737	2.97004	4.2789	5.85924	6.85034	26.8859	-0.833997	0.81624	3.77524	2.4756
cluster4	2.74471	2.42784	0.594584	0.534071	4.23489	4.36167	4.15522	4.2235	3.79451	4.32433	5.42334	5.48273	4.42276	0.309342	0.316285	1.25839	1.20567	6.83985	6.20148	1.90782	5.1752	9.6783	8.87052	11.468	11.4764	3.64908	2.6993	2.92294	4.25776	7.08713	6.78188	25.0002	-0.815138	0.775813	3.09202	2.66216
cluster4	2.60292	2.3915	0.623202	0.603866	3.7085	3.54794	4.08051	3.94243	3.40445	3.71902	4.15404	4.48027	3.98069	0.283288	0.286749	1.13047	1.10443	5.35661	4.81708	1.66945	4.38101	8.19829	7.49399	9.93863	10.5125	2.91145	2.5135	2.79659	3.97678	6.02708	6.0458	24.0002	-0.815138	0.775813	3.02344	2.49631
cluster3	3.29006	2.8992	0.803452	0.726748	4.24041	4.31995	3.81742	3.95142	3.70202	3.96181	5.89557	5.90884	4.48844	0.355854	0.35037	1.48948	1.38341	6.48988	6.01576	1.65196	5.13711	8.90159	8.86047	11.0044	11.9532	3.75017	2.90625	3.09643	4.56548	6.38157	6.94967	27.0288	-0.810423	0.765706	2.47336	2.13807
cluster4	2.42121	2.44917	0.507624	0.578857	3.65599	4.01623	3.86413	4.23587	3.33811	3.70494	4.24251	4.40465	3.71796	0.302899	0.268596	1.0842	1.213	5.83149	5.7341	1.46351	5.14655	8.21979	8.6945	10.2583	10.6303	3.2637	2.46216	2.89311	4.10376	6.55078	6.77867	17.8859	-0.833997	0.81624	4.06605	2.11324
cluster2	2.70136	2.28791	0.568347	0.442363	3.64576	3.39523	3.70508	3.82074	3.34202	3.46981	4.99656	5.00602	4.01751	0.28403	0.314449	1.17347	0.932163	5.42038	4.91462	1.74623	4.56603	8.69876	8.16139	10.6011	8.93078	2.73532	2.48329	2.68661	4.29361	6.45171	5.94202	20.4716	-0.819853	0.78592	2.56015	2.34945
cluster3	3.10507	2.88027	0.714891	0.721559	4.06477	4.52393	4.00653	4.41033	3.45059	3.89201	5.92843	6.2995	4.53379	0.324185	0.320525	1.33903	1.371	5.87579	6.18879	1.89363	4.80232	8.94638	9.2369	11.0027	10.9892	3.54146	2.70605	3.06565	4.42063	6.60965	6.38865	24.143	-0.791564	0.725279	2.49709	1.86044
cluster4	2.52646	2.38708	0.661338	0.704064	3.83318	4.02275	3.63525	4.17152	3.43239	3.75406	5.15362	5.4451	4.31063	0.340682	0.301697	1.38152	1.43961	6.83047	6.96749	1.85701	5.91578	9.88987	10.3427	11.5229	11.6378	3.70663	2.81717	3.25348	4.08957	7.42127	7.26229	23.0573	-0.805709	0.755599	2.92773	2.06645
cluster4	2.7008	2.46115	0.594844	0.565664	3.53714	4.14771	3.75468	3.91624	3.40217	3.85939	4.17505	4.24552	3.52475	0.33025	0.320451	1.2074	1.16472	5.65299	5.00965	1.68545	4.63393	8.80679	8.45314	10.773	11.0716	2.91175	2.75247	3.10763	4.09635	5.76418	6.60999	20.2574	-0.855213	0.86172	3.09681	2.14566
cluster4	2.72343	2.56039	0.608979	0.58938	4.15873	4.05375	4.19355	4.04734	3.64073	3.9075	5.08429	5.28608	3.89028	0.299074	0.325125	1.1852	1.13574	5.81683	5.65156	1.66871	4.94268	9.14461	8.4483	10.8795	9.6467	3.28244	2.68358	3.09998	3.80907	6.43458	6.74565	21.8288	-0.843426	0.836453	3.15648	2.88291
cluster3	3.15558	2.95055	0.736938	0.638737	4.37606	4.37454	3.80295	4.15885	3.61337	4.11743	6.21672	6.42182	4.82779	0.353386	0.373909	1.47609	1.34937	6.87457	6.71161	2.03782	5.07895	11.0008	9.92893	13.512	13.2846	3.966	2.91807	3.29352	4.67651	7.14987	7.64316	24.0288	-0.810423	0.765706	2.70142	2.51272
cluster4	2.77131	2.48164	0.638429	0.591641	3.65281	4.23854	3.48145	3.87834	3.19379	3.44266	4.51955	4.83508	4.25406	0.294188	0.271534	1.0697	1.04599	5.66853	5.40707	1.63142	5.02753	8.08945	8.69815	10.0094	11.0241	3.33517	2.48017	2.77512	3.91738	6.36969	6.15385	19.8145	-0.845784	0.841506	4.16498	3.34722
cluster5	2.99159	2.65141	0.735447	0.684532	3.61534	4.15175	3.8866	3.97512	3.52941	3.79574	5.23464	4.9755	4.03996	0.316988	0.337108	1.36951	1.27479	6.75815	5.86082	1.68049	5.38619	9.83291	9.40765	11.9669	11.2092	3.45556	2.7827	3.07563	4.1296	6.72617	6.20934	22.9431	-0.824567	0.796026	2.59724	2.82607
cluster2	2.5179	2.23145	0.538205	0.468949	3.70457	3.80344	3.6666	3.84203	3.39487	3.81368	4.53484	4.78755	4.26172	0.288355	0.28712	1.0846	0.970169	5.5399	5.36061	1.53838	4.41691	8.67355	8.70544	10.528	9.92584	3.05275	2.64649	2.88904	4.08764	5.87684	5.58282	22.9859	-0.817495	0.780866	3.63966	2.65899
cluster2	2.40644	2.23163	0.519948	0.47474	3.49335	3.72369	3.846	3.94903	3.14656	3.21329	5.01459	4.96894	4.38339	0.285431	0.320226	1.17307	1.0703	5.54893	4.92583	1.62363	4.34341	8.08462	7.74623	10.0275	8.8511	3.08076	2.39294	2.64148	3.74817	6.15815	5.76495	20.5002	-0.815138	0.775813	2.96538	2.58185
cluster5	2.74699	2.61779	0.597453	0.620607	4.38023	4.3439	4.03455	4.1849	3.79543	4.11609	5.02278	5.30124	4.10204	0.328094	0.321232	1.27062	1.39074	6.7276	6.68405	1.94935	5.64002	9.24486	9.44523	11.4549	11.4586	3.90745	2.76922	3.22741	4.79387	7.55147	7.44005	20.543	-0.808066	0.760653	2.47333	1.78579
cluster2	2.22967	2.12766	0.528053	0.509775	3.57121	3.7577	3.75705	3.8842	3.36619	3.74709	4.31093	4.60395	3.86109	0.253735	0.266197	0.917525	1.01198	4.825	4.52576	1.56116	5.01199	8.42253	7.78361	9.95273	8.76465	3.04274	2.15094	2.71884	3.62267	5.6013	5.4311	20.4145	-0.829282	0.806133	3.23474	2.43049
cluster2	2.66789	2.31623	0.65782	0.556096	4.01711	4.39273	3.92867	4.33305	3.66543	4.35592	3.96429	4.06739	3.77744	0.278934	0.289614	1.28824	0.986909	6.39349	5.63928	1.64411	4.3397	8.64545	9.02604	10.4304	11.3932	3.1179	2.80384	2.90878	4.40341	6.49516	5.52019	20.286	-0.850498	0.851613	3.71058	2.68054
cluster4	2.52419	2.41004	0.589611	0.562903	3.72696	4.03923	3.96384	3.79822	3.38447	3.53773	4.41304	4.65126	3.96195	0.275768	0.281892	1.09215	1.11637	5.69598	5.29186	1.50839	4.09329	7.55838	7.7528	8.65674	7.80431	3.19176	2.36085	2.70971	4.14984	5.9492	6.05945	20.4573	-0.82221	0.790973	3.28666	2.38041
cluster1	2.03406	1.71397	0.440075	0.337458	2.73315	3.05781	2.99947	3.33577	3.25476	3.27952	3.15053	3.4148	3.43738	0.214426	0.204239	0.779514	0.684482	4.33115	4.10192	1.06248	4.37963	6.38933	6.07282	7.66199	7.88839	2.6825	2.23296	2.3802	3.50471	4.60405	4.24619	10.8002	-0.848141	0.84656	4.21915	3.16505
cluster2	2.68144	2.273	0.611002	0.632609	3.36692	3.47534	3.02411	3.20038	3.32568	3.8742	4.41258	4.01129	3.67601	0.246836	0.281101	1.18731	1.26653	6.11008	5.44201	1.3959	4.50665	9.37462	8.87116	11.4219	10.8339	3.4035	2.43363	2.78624	3.52868	6.30366	6.43173	15.1859	-1.06587	-0.138146	2.54365	2.66336
cluster1	1.7502	1.82591	0.341999	0.389384	2.89962	3.11787	3.13516	3.48025	2.60111	3.17083	3.36138	3.94319	3.79914	0.196625	0.214129	0.64793	0.711072	4.35279	3.94783	1.21758	3.51213	6.50198	5.77616	7.38589	6.57492	2.47564	1.87792	2.22924	2.76212	4.89524	4.28744	20.9145	-0.0175723	2.00349	3.10506	3.14005
cluster4	2.59796	2.42089	0.60884	0.600012	4.73941	4.64126	4.43475	4.49164	3.41003	3.91726	5.82186	6.22593	4.4826	0.341392	0.338519	1.23719	1.19738	6.86727	6.37558	1.94914	5.01833	10.3919	9.43655	11.912	11.2081	3.40846	2.53185	2.81388	4.99089	7.06496	6.75257	27.2859	-1.46409	0.136818	2.56239	2.59005
cluster4	2.43345	2.32656	0.618631	0.619	3.66284	3.36104	3.5954	3.6599	3.17563	3.51364	4.12949	4.21159	3.90934	0.277632	0.251999	1.19776	1.27052	5.38296	5.15078	1.35518	4.55873	8.20096	8.00715	9.91755	8.87468	3.15222	2.47239	2.91349	3.72672	6.03802	5.67082	19.9002	-0.83164	0.811186	3.59771	2.75185
cluster1	2.05931	1.85169	0.38197	0.376217	3.47391	4.13632	3.74033	3.89213	3.16737	3.55836	4.23372	4.50995	3.74115	0.219812	0.211574	0.652819	0.695641	4.17154	4.5091	1.21315	5.13171	6.42371	7.72007	8.27935	9.23998	3.24468	2.11756	2.39302	3.95417	4.75266	5.17178	20.3859	-0.833997	0.81624	3.49705	2.84751
cluster2	2.39374	2.22289	0.465207	0.467219	2.93811	3.13804	2.72925	3.04789	2.75673	3.29109	4.1686	4.62669	4.15294	0.199666	0.191835	0.807068	0.880214	3.57945	3.57921	1.25464	4.62202	5.15944	5.00799	5.92565	5.64101	3.07673	2.07988	2.42803	3.26127	3.85287	3.6433	12.9288	-0.826925	0.80108	3.14439	2.40687
cluster1	2.02633	1.99381	0.369888	0.420062	3.41164	3.33884	3.32369	3.65145	2.97186	3.54347	4.4446	4.78625	4.33262	0.255707	0.247903	0.733147	0.823563	4.78721	4.84518	1.36227	4.41632	7.48063	7.67292	8.937	9.35525	2.76557	2.06282	2.52802	3.77446	5.29089	5.84375	21.8716	-0.836354	0.821293	3.44913	2.72841
cluster2	2.27256	2.17791	0.572691	0.597118	3.89428	3.45853	3.67468	4.09391	2.9654	3.40219	4.93872	5.39215	4.05649	0.284488	0.285693	1.11173	1.11848	5.21865	4.82094	1.55962	4.82438	8.04378	7.76029	9.63639	9.41669	3.13602	2.20432	2.6039	4.36408	6.08115	6.29738	22.243	-0.525738	0.315283	2.52319	2.37008
cluster4	2.60899	2.38261	0.615864	0.617013	3.41331	3.84364	3.50246	3.96539	3.04222	3.58417	4.62977	5.12655	4.24926	0.303823	0.287068	1.11493	1.21301	4.87362	4.71177	1.25875	4.55467	7.04664	7.30542	8.20619	9.19512	2.97972	2.31756	2.66156	4.07533	5.67828	5.83923	18.9573	-0.82221	0.790973	3.05219	2.36266
cluster4	2.46307	2.41525	0.532678	0.492847	3.72455	3.98861	3.8146	3.85832	3.10949	3.26016	3.86795	4.00504	4.12927	0.274199	0.267291	0.946015	1.00128	4.59467	4.69883	1.39664	3.89163	6.67783	6.76194	8.54047	7.37873	2.86893	2.36657	2.79369	3.7821	5.60313	5.3048	10.9145	-0.417593	2.00349	3.50418	2.69143
cluster2	2.32456	2.27277	0.469675	0.552286	3.44641	3.69076	3.69593	3.68522	3.15374	3.46499	3.31006	3.63888	3.63154	0.242501	0.244103	0.980542	1.13373	5.15716	4.92345	1.22452	4.11715	7.40581	7.54485	8.34022	7.67949	2.77376	2.30155	2.89	3.4276	5.24421	5.41054	23.7431	-0.85757	0.866773	3.42526	2.79646
cluster1	2.16476	1.91444	0.544201	0.522622	3.63245	3.70949	4.20732	3.95341	3.40213	3.63319	4.05361	4.25836	3.88641	0.258793	0.256871	0.98855	1.02227	4.76322	4.03431	1.34059	5.1839	7.74766	6.18981	9.17961	7.95964	3.21523	2.14015	2.5159	3.65681	5.49976	4.66804	16.9002	-0.83164	0.811186	3.10241	2.36572
cluster1	2.2032	1.92459	0.502035	0.461476	3.14826	3.49216	3.71759	3.85577	3.07888	3.51103	3.8783	5.34431	4.25477	0.255969	0.229605	0.932329	0.860545	4.95778	4.65646	1.42978	4.62061	7.97376	7.59994	10.6443	10.2372	2.95404	2.26397	2.36398	3.6035	5.35042	4.99238	23.0288	-1.15225	-0.239971	3.03046	2.58719
cluster4	2.4323	2.53428	0.614158	0.686201	3.75048	4.07847	3.52131	3.66579	3.39968	3.89455	4.06755	4.60169	3.82386	0.295519	0.303963	1.13629	1.24933	6.13356	5.76429	1.4623	4.79059	9.54039	9.4926	11.2345	10.8911	3.0506	2.47949	2.90466	3.77303	6.51989	6.49737	18.8716	3.29296	-0.839099	3.5255	2.02626
cluster4	2.5432	2.45413	0.549692	0.569129	3.48676	4.0725	3.72235	4.3425	3.36887	3.53089	4.49097	4.95421	4.16435	0.287207	0.301869	1.09257	1.10174	5.7374	5.67454	1.65014	5.3766	7.97593	8.23546	10.3737	10.4963	3.55305	2.63153	2.92197	4.06993	5.25999	5.40311	20.043	-0.233088	1.58733	3.46717	3.08172
cluster2	2.23264	2.14002	0.459963	0.460045	3.7238	3.97383	4.42429	4.16296	3.36147	3.73998	4.31511	4.80717	3.83036	0.241042	0.245466	0.96142	1.01596	5.70763	5.38105	1.41986	5.43537	8.27079	7.99315	9.51174	9.36623	3.53548	2.44717	2.73501	4.47835	5.69051	5.69763	20.5859	-1.18998	0.94921	2.86228	3.13209
cluster2	2.63159	2.2003	0.527922	0.47187	3.79614	3.68602	4.31562	4.40594	3.18165	3.43566	4.23431	3.93927	4.12751	0.243753	0.249366	0.971291	0.923599	5.00532	4.3262	1.51059	4.37316	7.29292	6.1826	8.48292	7.21791	2.88058	2.46227	2.66976	4.01671	5.10059	4.98369	-0.185483	-0.77868	2.03886	3.15974	2.55055
cluster5	2.68509	2.6301	0.612062	0.625506	3.41853	3.90652	3.19745	3.68719	3.2774	3.68745	4.42528	5.14547	4.02023	0.296674	0.282352	1.19805	1.23721	5.72856	5.33904	1.57406	5.2031	8.61069	8.67232	10.2501	11.022	3.48258	2.57071	2.90417	3.79093	6.36177	6.11065	24.9431	-0.824567	0.796026	2.84068	2.22446
cluster2	2.29406	2.14938	0.462154	0.448201	3.64273	3.76938	3.39941	3.79715	3.35438	3.60591	4.71949	4.71948	4.10888	0.262032	0.282418	0.896882	0.827244	5.31492	4.84321	1.51213	4.41666	8.34968	7.8137	10.4153	9.1947	3.18118	2.0007	2.35059	4.06692	5.89435	5.4079	22.0288	-0.810423	0.765706	2.90128	2.42756
cluster4	2.46592	2.46071	0.545367	0.631175	4.33318	4.56697	3.9895	4.26602	3.82357	4.08493	5.05951	5.58586	4.04808	0.299596	0.298079	1.08957	1.27562	4.95596	5.77159	1.80059	4.95794	7.74342	8.78861	10.0399	10.8268	3.1906	2.2739	2.86122	4.38816	6.30241	6.36907	18.0288	-1.41424	-0.336371	2.70709	2.65348
cluster1	2.05947	1.88671	0.478087	0.403948	3.76557	3.57421	3.67793	3.49456	2.80638	3.11818	4.26706	4.64767	3.84342	0.229223	0.2395	1.00502	0.876824	4.78185	4.476	1.32025	3.7133	7.0479	7.00121	8.66992	8.50183	2.58036	2.34034	2.56619	3.85071	5.82634	5.23961	22.1002	-0.178249	0.749657	2.65313	2.04251
cluster2	2.3013	2.17128	0.501413	0.506021	3.58993	3.94285	3.798	3.861	3.08797	3.69384	4.79224	5.01057	4.21698	0.263367	0.256678	0.915164	0.952578	4.96574	4.54904	1.54504	5.02334	8.64324	8.02685	11.0831	10.1284	3.09262	1.99716	2.53144	4.11852	5.26146	5.27592	22.9431	-0.104163	-0.40893	2.75617	2.29607
cluster5	2.95093	2.60037	0.604186	0.589771	3.77325	3.93559	3.7403	4.0509	3.36769	3.55726	6.04071	6.09735	4.3413	0.284353	0.292442	1.34501	1.25293	6.22866	5.88766	1.91111	5.56945	9.67852	8.56919	12.0778	10.373	3.60416	2.73278	2.83322	4.09439	6.9486	6.49137	25.1287	-0.198064	1.92769	2.08402	2.00967
cluster2	2.38158	2.1184	0.576352	0.542143	3.58707	4.04006	3.50965	4.02626	3.42914	3.73989	3.54113	3.55515	3.58146	0.245208	0.257543	1.14674	1.10688	5.35822	4.79482	1.66614	4.74114	7.81547	7.50778	9.30569	8.76504	3.52961	2.43142	2.68041	4.17519	6.13363	5.92636	23.8574	-0.838712	0.826346	3.45862	2.20154
cluster4	2.65942	2.37493	0.626922	0.625264	3.73449	3.91609	3.97086	4.01723	3.2323	3.60542	5.48377	5.82843	4.45239	0.294377	0.295382	1.25664	1.29813	6.12008	5.71258	1.71784	4.52531	9.09602	8.70069	11.3526	10.6032	3.19517	2.65799	2.98946	4.15261	6.86549	6.56471	19.9716	-0.714592	-0.0746012	2.88197	2.78152
cluster4	2.77373	2.51402	0.642802	0.623606	3.96485	4.15646	3.68149	3.74912	3.31221	3.42054	5.67948	5.66891	4.59415	0.286282	0.30002	1.22402	1.06694	5.21285	4.924	1.56964	4.26612	8.03309	7.57325	10.4051	9.03168	2.75314	2.37177	2.62286	4.10502	6.00716	5.6135	20.1573	-0.160254	-0.439052	2.85306	2.63264
cluster4	2.64776	2.35423	0.593901	0.569106	3.68559	3.9305	3.55339	3.69395	3.66769	4.20186	4.30386	4.60812	4.12179	0.295083	0.283284	1.15364	1.07787	5.1499	5.08004	1.42676	4.5382	8.15087	7.44895	9.86105	9.39278	3.06497	2.39461	2.85348	4.10783	5.61182	5.80505	21.8145	-0.845784	0.841506	3.67281	2.57571
cluster2	2.22811	2.24752	0.447524	0.522889	3.53532	3.54024	3.83099	3.69586	2.83269	3.57544	4.13752	4.47428	3.90176	0.264392	0.249087	0.837207	1.07475	4.59227	4.94158	1.38668	4.64327	7.19775	7.81227	8.95169	8.71199	2.88994	2.14957	2.76588	3.6834	5.35508	5.69885	24.8574	0.210752	0.191872	3.39377	3.19785
cluster2	2.32003	2.24717	0.50112	0.511356	3.34671	3.66496	3.37127	3.6256	3.20774	3.73166	4.76518	5.20875	4.20316	0.259676	0.254228	0.894754	0.965	4.83943	4.31355	1.4204	4.56447	6.97983	6.73395	8.72691	8.98826	3.14795	2.22864	2.45738	3.87462	5.44447	5.34248	23.0002	-0.693816	1.16632	2.70575	2.28003
cluster1	2.09152	1.8538	0.488063	0.47295	3.78249	3.74664	3.53768	3.50417	3.14385	3.30654	3.29128	3.68302	3.53973	0.26577	0.259448	1.02101	0.940234	5.183	4.60296	1.46417	4.81969	8.1143	7.26706	9.24286	8.7238	3.36433	2.37712	2.62727	4.03281	5.82129	5.82763	8.78595	-0.149757	0.0581148	3.50818	2.78639
cluster1	2.03585	1.58263	0.528599	0.463792	3.36816	3.72981	3.65899	3.75299	3.31665	3.66404	4.1531	4.22027	4.05993	0.303847	0.296674	1.00694	0.88734	6.06202	5.22843	1.41567	4.87566	8.77032	8.1534	9.64389	9.23994	3.03786	2.2145	2.51066	3.75889	6.01052	5.76688	21.8002	-0.848141	0.84656	3.33253	2.97618
cluster2	2.27928	2.16814	0.52958	0.52041	3.54813	3.97782	3.8453	3.87591	3.17745	3.66982	5.22339	5.68938	4.30647	0.285174	0.271254	1.07937	1.12414	6.0217	5.88736	1.43275	4.95855	9.38494	8.47426	11.2664	10.3412	3.24905	2.36651	2.81026	4.1789	5.73086	6.27413	21.043	-0.664798	0.589795	2.61565	2.45877
cluster1	1.97725	1.62586	0.429992	0.31352	3.45483	3.45904	3.51243	3.46972	3.1523	3.60247	3.87212	4.1164	3.70864	0.221271	0.231237	0.835031	0.597288	4.52236	4.06782	1.23788	4.55277	6.39746	5.8599	8.44213	7.90817	2.93225	2.06817	2.13702	3.71846	5.38697	4.94984	22.8145	-0.880294	-0.0282145	3.29602	2.77114
cluster1	1.9932	1.81107	0.378805	0.372899	3.04219	3.1189	3.55049	3.27521	2.82464	3.52368	3.65178	3.8966	3.53107	0.212256	0.218603	0.645391	0.61892	4.25808	3.71975	1.19634	3.53066	5.52996	5.17732	6.32527	6.19405	2.44914	1.99183	2.18016	3.10377	3.91301	3.47895	17.8145	-1.22954	-0.174359	3.14345	2.14599
cluster4	2.51397	2.39478	0.599182	0.578141	4.03248	3.85205	3.91695	3.81804	3.42175	3.89217	4.97227	5.14384	4.10671	0.272931	0.270085	1.24122	1.24929	5.90094	6.05773	1.39829	4.33582	9.14411	9.97799	10.7404	11.0257	3.30316	2.71387	3.07883	4.11453	6.44204	6.22211	24.9145	-0.829282	0.806133	2.9041	3.27962
cluster5	2.93542	2.8109	0.778347	0.735933	4.42474	4.21868	4.29985	4.20337	3.80531	4.40605	5.38394	5.62279	3.89004	0.358745	0.363397	1.50129	1.44241	7.14801	6.63564	1.86718	5.67422	10.2131	10.8124	12.2099	13.6354	3.50771	2.84055	3.1635	5.53357	7.05512	7.70879	28.1859	-0.784492	0.710119	2.40981	2.26723
cluster2	2.51829	2.30298	0.58728	0.559193	4.48815	4.42433	3.84626	4.24184	3.38431	3.37555	5.37009	5.3081	4.3529	0.291725	0.301963	1.22095	1.11418	5.25806	4.79874	1.63911	3.24583	7.8312	7.14175	9.8868	8.23331	2.48477	2.49012	2.66942	4.37261	6.93643	5.74643	7.20016	-0.782135	0.705066	3.05158	1.98558
cluster1	2.05765	1.93743	0.379785	0.351854	3.40457	3.47551	3.31227	3.43591	3.07153	3.59085	3.15304	3.3815	3.24003	0.215722	0.212148	0.76479	0.715467	5.17683	4.7317	1.12024	4.37487	8.07084	7.41404	9.93655	8.22707	2.70734	2.09873	2.37507	3.20815	4.70674	4.12235	23.9145	0.110299	0.261908	3.49936	2.58179
cluster4	2.66443	2.34975	0.592735	0.55078	4.07414	3.83846	4.40141	4.11323	3.20148	3.57556	4.2877	4.38911	3.80086	0.261193	0.280974	1.25386	1.07178	5.94445	5.13681	1.64929	3.51938	9.10328	7.35021	9.83212	8.40574	2.7254	2.60908	2.82771	4.20776	6.13029	5.0103	16.0288	-0.0112703	1.22722	3.44169	2.29613
cluster4	2.62383	2.46454	0.580089	0.568332	4.10067	4.43928	4.08972	4.12218	3.43342	3.94857	3.69381	3.89724	4.02211	0.289063	0.28391	1.1833	1.22639	5.90712	5.53197	1.72526	4.86875	8.61496	8.24214	9.80627	9.21874	3.41148	2.696	3.08928	4.43586	6.69161	7.14399	15.8145	-0.845784	0.841506	3.40574	2.67186
cluster4	2.50799	2.38079	0.5435	0.642804	3.75206	4.01967	3.65548	4.27452	3.66105	4.14515	4.53863	4.78138	3.95914	0.2871	0.287698	1.15577	1.23213	5.5238	5.29456	1.59943	4.56305	8.39111	8.02296	10.5749	9.75235	3.28876	2.43992	2.81349	4.79512	5.9022	5.99112	29.0716	0.00762867	-0.0279118	2.93218	1.63568
cluster5	2.52026	2.60574	0.605286	0.633455	4.22778	4.56304	3.96821	4.25425	4.03409	4.40685	5.09679	5.26538	4.21117	0.284474	0.291992	1.14518	1.26546	4.99751	5.4765	1.64939	6.39802	8.31168	8.86591	11.4789	10.9424	3.87644	2.5033	2.90041	3.69326	6.28821	6.00849	25.9573	-0.82221	0.790973	2.74038	2.34826
cluster4	2.42931	2.41746	0.552892	0.635676	4.17646	4.32917	3.59969	4.14327	3.61316	4.06582	4.64715	5.08558	4.15536	0.307618	0.299709	1.02997	1.18944	4.77173	5.67706	1.56563	4.986	6.92492	8.56802	8.77406	10.2206	3.51519	2.07678	2.70694	4.49351	5.19575	5.63676	24.0002	-0.789876	2.00102	2.92431	2.86802
cluster2	2.22746	2.10448	0.581005	0.533392	3.21373	3.25279	3.43211	3.29903	2.95631	3.38861	4.16873	4.5208	4.22204	0.249009	0.241369	1.17258	1.15951	5.49232	5.29616	1.44829	4.29195	7.93701	7.62996	9.7505	9.23269	2.74426	2.36625	2.7421	3.26177	5.60323	5.45622	18.786	-0.850498	0.851613	2.7836	2.66347
cluster4	2.48767	2.36223	0.604514	0.577776	4.02382	3.93202	4.12763	4.21176	3.40022	3.86741	4.65083	4.88331	3.88268	0.295389	0.302895	1.20393	1.15714	6.60521	6.19328	1.79813	5.12466	9.89366	9.12871	11.067	9.55921	3.56759	2.47645	2.80422	4.63906	6.75239	6.66401	22.0145	-0.812781	0.770759	2.93349	2.92802
cluster4	3.05901	2.5658	0.74702	0.458409	4.30785	4.55379	3.73293	3.79289	3.72236	4.23206	5.28269	5.53274	3.84684	0.219977	0.274484	1.53543	0.883245	7.08481	5.80562	1.58749	5.85431	10.3567	9.15776	12.0506	10.5468	3.93551	2.9447	2.88138	4.45527	6.85537	5.39863	23.0573	0.193718	-0.0187127	2.23557	2.11152
cluster2	2.55595	2.24438	0.642782	0.601981	4.17027	4.20177	3.36144	3.6372	3.48206	3.69432	5.15559	5.26517	4.14305	0.288741	0.312648	1.23095	1.15051	5.97839	5.45744	1.76318	4.7669	8.2004	7.64526	10.324	8.97908	3.31875	2.50361	2.86647	4.03713	6.22496	5.99826	20.0573	-0.805709	0.755599	2.31531	2.06926
cluster2	2.4264	2.30999	0.506278	0.562878	3.927	4.00115	3.57867	3.76881	3.56224	4.09838	4.36558	4.75009	4.15267	0.279475	0.261951	0.964778	1.05474	5.24065	4.84971	1.41552	4.47406	7.92311	7.51398	9.67907	9.39223	3.1702	2.41151	2.86802	3.6696	5.377	5.61917	18.8716	-0.836354	0.821293	3.67401	2.66366
cluster1	1.98215	1.94351	0.43804	0.424497	3.46422	3.48106	3.66382	3.64746	3.06511	3.44198	3.96265	4.31157	4.07636	0.231574	0.235438	0.888816	0.938086	4.70661	4.62849	1.43191	4.27387	7.37924	7.47504	8.79552	8.47542	2.79024	2.15517	2.57124	3.74663	5.37345	5.12463	24.8002	-0.848141	0.84656	3.60667	2.58186
cluster4	2.75421	2.49511	0.61698	0.630801	4.11256	4.13077	4.00573	4.42925	3.5704	3.99551	4.59252	4.60337	3.78736	0.283258	0.287828	1.311	1.3489	6.47655	6.40158	1.79275	5.35547	9.65778	10.0854	12.8809	12.9607	3.53621	2.70221	3.09269	5.31352	7.06412	7.14351	23.043	-0.808066	0.760653	2.73102	2.61872
cluster1	2.31118	1.97938	0.45456	0.441643	3.52728	3.52653	3.4692	3.70993	2.97436	3.48378	3.75677	4.14652	3.90992	0.230418	0.232936	0.775279	0.83672	4.15617	4.06553	1.38971	4.5407	6.42672	6.78668	8.00157	7.56343	2.9216	1.96601	2.41057	3.87834	4.84838	5.19359	12.8716	-0.836354	0.821293	3.95427	2.75802
cluster1	2.25152	2.05886	0.528564	0.460517	3.48212	3.70762	3.66845	3.44931	3.08173	3.6872	5.01189	4.86809	3.8489	0.243969	0.260472	0.965785	0.950687	5.19513	4.88074	1.33516	4.79973	8.01615	7.59562	9.21685	8.98974	3.18798	2.26445	2.599	3.75413	5.6121	5.29578	18.7717	-0.852856	0.856666	2.89272	2.40397
cluster1	2.1869	1.9056	0.484682	0.420338	3.36347	3.49854	3.69294	4.00239	3.29217	3.97455	3.57588	3.47312	3.41395	0.250947	0.2612	0.991691	0.866446	5.84113	5.3917	1.39426	5.17736	8.38305	8.38023	10.4262	9.95333	3.05817	2.43954	2.68706	3.96307	5.99733	5.23659	22.8574	-0.838712	0.826346	3.39354	2.08641
cluster2	2.28593	2.27755	0.512691	0.600776	3.98903	4.38423	4.02567	4.25758	3.58463	3.99417	4.65858	4.9509	3.77262	0.309179	0.282728	1.05818	1.31579	5.61001	5.61621	1.71855	4.85207	8.00883	8.48656	9.7203	10.5135	3.16237	2.32317	2.76043	4.47276	6.05896	6.55686	19.9573	-0.82221	0.790973	2.68088	2.32551
cluster1	2.40827	1.81923	0.544254	0.526635	3.5199	3.86139	3.73083	3.78909	3.34402	3.58614	3.75465	3.91669	3.97207	0.27517	0.284866	1.03812	1.0324	5.26653	4.73666	1.37336	4.09847	7.80886	6.82976	9.2209	8.54265	2.68262	2.48625	2.50205	3.9131	5.55613	5.50381	20.8288	-0.843426	0.836453	3.97266	2.76536
cluster4	2.60574	2.52515	0.6019	0.649418	3.84816	4.67309	3.60119	4.325	3.26678	3.7304	5.04314	5.33472	4.56648	0.296307	0.286043	1.22503	1.28786	5.60381	5.78596	1.79002	5.11915	8.75169	9.22781	11.2006	11.3405	3.15524	2.47274	2.85737	4.46208	6.38661	6.1286	25.1145	-0.293869	-0.536182	3.09368	1.89078
cluster4	2.73854	2.42208	0.536227	0.491716	4.04988	3.90605	3.86669	3.61402	3.17939	3.41606	5.25766	5.591	4.41951	0.246233	0.256549	1.02549	0.963114	5.40712	5.1809	1.59168	4.88914	7.46401	7.38118	9.79639	8.06119	3.34937	2.45693	2.61989	3.89855	5.7584	5.53033	8.04304	-0.808066	0.760653	3.06238	2.35418
cluster1	1.67529	1.64186	0.352726	0.402285	3.80359	4.09387	3.61404	3.47902	2.9997	3.57498	3.70677	3.98819	3.61997	0.217094	0.212362	0.748277	0.744675	4.9923	5.13095	1.23747	5.20305	7.8093	7.85339	8.98023	8.99698	3.17328	1.9795	2.23454	3.78532	5.27413	4.98064	15.9145	-0.829282	0.806133	3.05965	2.06725
cluster2	2.40433	2.31277	0.525172	0.542375	3.68628	4.01751	3.4629	3.29801	3.5412	3.90955	4.11315	4.29897	3.90544	0.235768	0.255997	1.0125	1.03234	4.82317	3.92537	1.37382	3.49287	7.08804	6.17063	8.70289	7.14246	2.54849	2.35873	2.64028	3.78159	4.88896	4.44023	18.9288	-0.826925	0.80108	3.42167	2.87167
cluster2	2.48098	2.17405	0.549277	0.459607	4.25216	3.92313	4.54288	4.40383	3.47662	3.63668	4.50435	4.25692	3.79113	0.286369	0.295854	1.16251	0.971795	6.17354	5.62253	1.65094	4.53901	8.14365	8.12278	9.80715	9.15856	3.40095	2.4943	2.62171	4.4281	6.34182	6.16943	23.9288	-0.876435	1.99844	3.45522	2.21033
cluster1	2.06833	1.96702	0.438837	0.430045	3.82664	3.90598	3.82711	3.51838	3.38261	3.64801	5.30329	5.70547	4.33383	0.257181	0.253995	0.919212	0.847047	5.27332	4.85502	1.40155	4.37277	8.41611	7.86857	10.2325	9.04338	3.15645	2.32866	2.54659	4.23927	6.12111	6.04053	16.8431	-0.841069	0.8314	3.60706	2.51328
cluster1	2.05963	1.78554	0.45429	0.434776	3.80401	4.06392	4.31421	4.37817	2.79905	3.01461	5.30622	5.44904	4.15319	0.283975	0.254587	0.988992	0.996947	5.53965	5.13186	1.69945	4.50362	8.18691	7.88479	9.67056	8.61396	3.0341	2.18727	2.39266	4.56078	6.12984	5.69007	14.143	-0.331497	0.279324	2.48371	2.15781
cluster5	2.71292	2.61916	0.632115	0.608444	3.50456	3.86512	3.12491	3.71992	2.66563	3.03674	4.85489	4.96005	4.521	0.304074	0.311215	1.19777	1.17438	5.8597	5.04512	1.59978	4.87485	8.82236	7.9447	9.2077	9.01453	3.23304	2.33312	2.89228	4.16212	6.50428	5.56651	21.0288	-0.810423	0.765706	2.80829	2.78672
cluster4	2.51096	2.41934	0.489299	0.518668	3.14612	3.38419	3.03247	3.03933	3.10712	3.29022	4.58902	4.7846	4.12153	0.276204	0.283839	1.04745	1.02632	5.27353	4.94562	1.13876	4.58684	7.56638	7.56559	9.20125	8.86285	3.24983	2.36767	2.76147	3.89913	5.00652	5.19203	15.9288	-0.826925	0.80108	3.00303	4.14551
cluster4	2.59726	2.41526	0.51557	0.504757	4.06445	4.31084	3.51367	3.89381	3.39825	3.92446	4.41438	4.2325	3.90363	0.335244	0.347672	1.03947	1.03376	5.92625	5.43659	1.51169	5.207	8.59619	8.31177	11.1378	10.0812	3.49495	2.6112	2.9881	4.60563	5.83563	5.7222	21.9573	-0.82221	0.790973	3.31937	3.95645
cluster2	2.40383	2.36685	0.480157	0.499779	3.8912	4.08179	3.49094	3.54005	3.50093	4.03031	4.53325	4.9983	4.09636	0.293716	0.303501	1.11866	1.14463	6.35446	6.30112	1.69947	5.74692	10.2517	10.1291	13.2588	12.995	3.92554	2.47118	3.02215	4.44201	6.56918	6.8036	21.9716	-0.819853	0.78592	2.82859	3.80609
cluster4	2.5772	2.38871	0.566862	0.530028	3.9943	3.97299	3.9395	3.63076	3.59185	3.87741	4.51009	4.77394	4.25407	0.282774	0.276061	1.12251	1.06621	5.12494	5.21025	1.45031	5.05173	8.47002	8.50352	10.7317	11.3724	3.23825	2.37747	2.70608	4.02913	6.04274	5.6532	11.9716	-0.819853	0.78592	3.30145	2.15302
cluster2	2.44855	2.34281	0.489704	0.518019	4.1619	4.12096	4.25532	4.07917	3.83781	4.17995	3.62051	3.7167	3.49088	0.261378	0.262195	0.942936	1.0454	4.51671	4.41412	1.50866	4.67928	7.80005	7.41781	9.11848	9.97923	3.18904	2.01514	2.79327	3.95236	5.71343	5.40406	19.7431	-0.85757	0.866773	3.66132	2.78053
cluster2	2.44834	2.23887	0.511768	0.515048	4.0476	4.39349	3.95363	4.18219	3.52235	4.08864	3.93123	4.22377	3.90096	0.312938	0.288553	0.937562	0.992807	5.46594	5.48073	1.50102	5.05858	8.01038	8.32134	9.24618	8.84665	3.59201	2.39812	2.78372	3.99903	5.83026	6.10348	21.8002	-0.848141	0.84656	4.2664	3.03226
cluster2	2.32116	2.20844	0.506175	0.497516	3.66896	3.98672	3.24982	3.88501	3.06696	3.22476	4.75787	5.04087	4.60251	0.262579	0.270386	0.958516	1.00073	5.74136	5.46695	1.40767	4.9224	8.22383	8.13038	9.75635	10.1733	3.34211	2.32437	2.68639	3.65561	5.29293	5.24598	21.9002	-0.83164	0.811186	3.58393	4.0155
cluster2	2.16383	2.10978	0.445371	0.49954	4.14429	4.54204	4.21467	4.15612	3.33134	3.89095	4.36645	4.53521	3.79352	0.273134	0.263554	0.794853	0.980171	5.38216	5.48173	1.57498	5.38945	8.07619	8.23812	10.8708	10.6241	3.52259	2.17183	2.58083	4.90163	5.71891	5.84412	16.9573	-0.82221	0.790973	4.17929	2.71385
cluster2	2.43039	2.20362	0.533058	0.520645	3.47562	3.45322	3.32526	3.74256	3.13268	3.69054	3.44412	3.65135	3.43885	0.258482	0.263492	1.12762	1.18797	5.51058	5.01023	1.4018	4.48271	7.91014	7.60031	9.34459	8.52239	3.1312	2.51153	2.77208	3.82447	6.05128	6.29653	18.9002	-0.83164	0.811186	2.92353	2.40806
cluster1	2.31304	2.01362	0.456442	0.389396	3.73581	3.78757	4.06502	3.79192	3.06611	3.34346	4.67805	4.63883	4.40142	0.236348	0.232317	0.944605	0.854583	5.32085	4.85525	1.54081	5.05156	7.61551	6.64381	9.23239	8.2071	3.62029	2.40884	2.66985	4.11542	5.47278	4.82921	12.0288	-0.810423	0.765706	3.11686	2.88585
cluster1	2.12275	1.88505	0.449829	0.439612	3.30092	3.4756	3.61446	3.60145	3.03425	3.38103	4.35329	4.64708	3.85836	0.26355	0.25872	0.851865	0.881261	5.21527	5.00807	1.27284	4.66042	7.36788	7.17562	8.25007	8.92399	2.73788	2.24557	2.57921	3.69208	5.30099	5.40012	17.9288	-0.826925	0.80108	3.3268	3.49198
cluster1	1.97983	1.9354	0.454023	0.468217	3.35697	3.30289	4.12416	3.74855	2.8323	3.42624	3.28204	3.71246	3.61854	0.251619	0.250546	0.878377	0.968377	4.10392	4.38869	1.21474	3.83793	6.02757	6.72193	7.16862	7.90706	2.42009	1.95904	2.49433	3.33803	4.54849	5.39568	18.7431	-0.85757	0.866773	3.88848	2.4067
cluster2	2.17804	2.16535	0.512957	0.576567	4.25679	3.73765	3.88064	4.10679	3.37967	3.87851	4.92182	5.24675	4.22723	0.272799	0.262405	0.897468	1.14776	4.99416	5.11305	1.50385	5.04603	7.22104	7.07243	8.28512	8.75969	3.28375	2.22746	2.90752	4.14303	5.13932	5.53927	26.9431	-0.824567	0.796026	3.22248	2.87101
cluster4	2.55394	2.371	0.526821	0.501799	3.7828	4.2084	3.95965	4.10236	3.35969	3.69604	4.02169	4.02156	3.77829	0.268822	0.273125	1.08792	1.05639	6.08014	5.58835	1.5915	4.38752	8.26581	7.82493	9.2429	8.24714	2.88964	2.4588	2.93542	4.0407	6.1559	6.00903	17.8859	-0.833997	0.81624	2.83195	2.73179
cluster4	2.60428	2.44157	0.543386	0.570548	4.48952	4.53299	3.93337	3.92873	4.03335	4.34811	4.58663	4.50817	4.06952	0.319116	0.316514	1.11484	1.09464	5.67621	5.62146	1.63674	5.21517	8.66483	8.73206	11.5534	11.4182	3.59714	2.5411	2.98257	4.0789	5.75481	5.78528	22.043	-0.808066	0.760653	3.50628	2.72033
cluster1	2.16352	1.91942	0.441471	0.380936	3.59434	3.7684	3.39513	3.47383	3.36012	3.48208	4.06607	4.36206	4.20076	0.217434	0.214944	0.802997	0.688563	4.72933	4.45265	1.28995	5.0791	7.08953	6.60749	8.74247	8.46732	2.98224	2.18402	2.43076	3.75459	4.77279	4.41255	18.8145	-0.845784	0.841506	3.91566	3.27486
cluster4	2.76149	2.37291	0.612453	0.495688	4.35371	4.56174	3.7293	3.84582	3.56687	4.00218	4.26881	3.63687	3.66965	0.331376	0.358741	1.11403	1.05876	5.90482	5.63243	1.56684	5.93594	9.26675	8.87775	11.7174	11.723	3.68995	2.58821	3.01867	4.49347	5.75791	6.02826	9.75739	-0.855213	0.86172	3.34797	3.66887
cluster2	2.30493	2.30581	0.477438	0.51633	3.47834	3.70037	3.4548	3.85733	3.0673	3.64065	5.00143	5.18542	4.28043	0.256495	0.250114	0.859925	1.02329	4.53009	4.69367	1.41191	3.95369	6.46341	7.14977	8.19126	8.50686	2.77637	2.15552	2.6944	3.51959	5.15313	5.17842	25.9859	-0.817495	0.780866	3.04593	2.74031
cluster2	2.42253	2.29002	0.559181	0.557799	3.49216	3.59597	3.7171	3.99771	2.83753	3.44749	5.10397	5.46595	4.53639	0.282456	0.288577	1.28058	1.26424	6.18296	5.95321	1.57841	5.33358	9.68953	9.63348	11.4231	11.8252	3.50519	2.60295	2.87432	3.83057	6.79416	7.24454	15.143	-0.791564	0.725279	2.47752	2.7942
cluster1	2.16005	2.02693	0.465251	0.446108	3.31972	3.7908	3.37474	3.61527	2.99521	3.32399	4.67671	5.20096	4.50934	0.253662	0.238416	0.915758	0.927437	4.7927	4.82076	1.33832	4.43851	7.40693	7.03675	9.07082	9.67567	2.67555	2.13067	2.60587	3.66758	5.06882	4.98291	22.1573	-0.789207	0.720226	3.39817	2.58075
cluster2	2.29631	2.17926	0.454371	0.484129	3.44557	3.61104	3.12956	3.56398	3.42113	3.84864	3.91062	4.34579	3.79506	0.267481	0.246136	0.988649	1.02742	5.33244	4.67291	1.48111	4.42057	7.49564	7.07817	9.39053	8.2585	2.91987	2.37642	2.65773	3.25356	5.92819	5.69087	19.8002	-0.848141	0.84656	3.34324	2.97556
cluster1	2.03373	1.99462	0.385928	0.422363	4.04301	4.13234	3.66931	4.02991	3.1457	3.76276	4.54968	4.75336	3.99368	0.277292	0.276393	0.672111	0.778468	4.8655	4.71333	1.49917	5.06469	7.41953	7.48027	9.41864	9.17029	3.30228	2.13291	2.55066	4.07791	4.59949	5.13903	18.9431	-0.824567	0.796026	2.76961	2.87484
cluster4	2.41904	2.36482	0.572934	0.587803	4.46339	4.35911	3.78045	4.06828	3.94358	3.97004	4.2905	4.7152	4.12525	0.297224	0.294992	1.11621	1.23026	5.5225	5.53998	1.55902	5.02196	8.33631	8.40805	11.0028	10.8079	3.26368	2.56231	2.87505	4.3021	6.41949	6.35566	23.8716	-0.836354	0.821293	4.28989	3.10789
cluster1	1.96147	1.87173	0.4504	0.422254	3.73075	4.05505	3.87677	4.12752	3.09293	3.53568	4.10407	4.32426	3.77619	0.253729	0.242791	0.926504	0.879251	4.96578	4.47482	1.36535	4.56018	7.25013	6.80258	8.45069	8.03055	2.87168	2.12241	2.42089	3.5445	5.19815	5.15663	17.9145	-0.829282	0.806133	3.36094	2.76407
cluster2	2.27288	2.27822	0.50798	0.508072	3.64678	3.86768	3.59322	3.83948	2.80387	3.30755	4.70372	5.24187	4.1902	0.264604	0.249064	1.03175	1.05516	5.03963	5.34735	1.46958	4.5597	7.16846	7.4287	7.8348	8.45869	3.15985	2.18667	2.61841	4.07115	5.78586	6.04718	14.143	-0.791564	0.725279	2.69257	2.0604
cluster2	2.44452	2.27255	0.583447	0.577384	4.0172	4.08472	4.16263	4.027	3.09213	3.45233	4.90623	5.13326	4.33222	0.280509	0.290208	1.22888	1.13159	5.23651	5.1478	1.73332	4.36298	8.86074	8.17567	11.3234	9.84343	3.1307	2.47469	2.68934	4.09131	6.68286	6.72593	25.1573	-0.789207	0.720226	2.51927	2.1831
cluster2	2.43183	2.18356	0.576936	0.503507	3.82097	3.99079	3.72346	4.17684	3.16728	3.38974	4.46005	4.62737	3.93182	0.282622	0.259873	1.07421	1.03845	4.78581	4.77834	1.45317	4.47323	7.8518	6.87863	9.80164	9.02668	3.19694	2.19307	2.5976	3.68142	5.6102	5.50945	20.9288	-0.826925	0.80108	3.3516	2.8949
cluster2	2.47056	2.28941	0.526677	0.530478	3.69287	4.00988	3.93475	3.9968	3.35512	3.76458	4.37516	4.60558	3.77519	0.26349	0.255526	1.15099	1.12672	6.12936	6.21939	1.53123	5.75162	9.71666	9.64525	11.4842	11.132	3.7711	2.60405	2.92371	4.31172	6.67238	6.30482	22.9859	-0.817495	0.780866	3.03175	2.2838
cluster2	2.37703	2.15974	0.488015	0.530722	3.51144	3.56502	3.40602	3.39366	3.22969	3.51447	4.14664	4.07523	3.90788	0.221431	0.239693	1.02649	1.02826	4.96091	4.61629	1.43927	4.2616	8.3362	7.08519	10.6673	8.55675	3.06667	2.22009	2.62279	3.8429	5.88283	5.67047	20.8002	-0.848141	0.84656	3.13924	2.80825
cluster1	2.07334	1.92925	0.430375	0.458455	3.26315	3.73474	3.78531	3.90145	2.99874	3.33444	4.22578	4.36893	3.82085	0.241138	0.249027	0.904097	0.951365	5.02877	4.29763	1.53097	4.99322	7.96923	7.40721	9.73257	9.5673	2.69495	2.11963	2.39717	3.75519	5.9064	5.74692	23.9145	-0.829282	0.806133	3.05065	2.05824
cluster2	2.30986	2.17322	0.457886	0.432422	3.83317	4.02821	3.71838	3.93051	3.29195	3.92555	3.9655	4.10055	3.83264	0.261544	0.266678	0.946439	0.906174	5.40229	5.19217	1.38889	5.02814	7.81293	8.17547	9.93714	10.5164	3.24244	2.23279	2.62734	3.97425	5.38123	6.07703	20.8574	-0.838712	0.826346	3.25942	2.68661
cluster4	2.68578	2.45234	0.558602	0.515453	4.55899	4.93264	3.55567	3.77386	3.25975	3.58012	4.7269	4.36121	4.02274	0.31852	0.326317	1.02057	0.859104	5.70633	5.17286	1.53039	4.72825	7.76371	7.06186	8.62231	7.67324	3.30922	2.42364	2.67963	4.04089	5.97216	5.07682	14.1287	-0.793922	0.730333	3.82248	4.1465
cluster4	2.80058	2.43337	0.661836	0.523889	3.8986	3.95565	3.32607	3.54426	3.40024	4.18322	5.02311	5.13138	4.33811	0.269321	0.284621	1.35228	0.992574	6.08036	5.3941	1.62897	4.61474	8.11541	7.88162	9.66056	9.62729	3.1483	2.65889	2.64367	3.8643	6.59108	5.88712	18.9859	-0.817495	0.780866	2.44901	3.05943
cluster1	2.02224	1.84575	0.386491	0.362105	3.75683	4.23671	3.41096	3.94481	3.65582	3.9335	3.77345	4.06313	3.87757	0.308785	0.279578	0.680992	0.762522	4.6595	4.67398	1.36228	5.08454	7.11427	7.42602	7.7391	8.77209	3.21773	1.93882	2.45591	4.22624	4.79108	5.35599	13.8859	-0.833997	0.81624	4.0841	2.8028
cluster2	2.36709	2.27821	0.422975	0.484171	3.68183	4.29638	3.70363	4.09784	3.14257	3.67288	4.89809	6.05496	4.56704	0.307624	0.26652	0.669418	0.871791	4.06105	4.51262	1.64447	5.49449	5.59462	7.30912	7.16852	9.6097	3.33324	1.9491	2.39852	4.50595	3.52046	4.53641	23.1859	-0.784492	0.710119	2.38613	1.89801
cluster2	2.50048	2.13191	0.545198	0.45701	3.07827	3.44811	3.33125	3.9366	3.22596	3.74121	4.24261	4.6478	4.02742	0.261512	0.268323	1.21242	1.09366	5.95241	5.49375	1.70731	5.51426	8.93084	8.61866	10.631	10.7587	3.7094	2.60569	2.76984	4.17954	6.26482	6.52768	16.9573	-0.82221	0.790973	2.44511	2.30912
cluster4	2.68209	2.38719	0.601569	0.563675	4.15834	4.36463	3.81287	3.93358	3.52081	3.73821	3.25427	3.2804	3.9551	0.293881	0.318556	1.08599	1.02007	5.84877	5.52627	1.61606	5.46108	8.81495	8.48658	11.138	10.3318	3.41267	2.6227	2.92957	4.56386	6.01658	5.95223	17.9573	-0.82221	0.790973	3.69157	2.91213
cluster1	2.22048	1.94346	0.476188	0.420814	4.18908	4.26024	4.26224	4.27094	3.49103	3.95517	4.0455	3.74948	3.52992	0.265736	0.261514	0.994163	0.826509	5.12665	4.72989	1.62567	4.30229	7.69559	7.59435	9.12976	8.45629	2.78158	2.36442	2.56461	3.62817	5.56058	5.27275	22.8002	-0.848141	0.84656	3.1373	2.82915
cluster5	2.63105	2.58823	0.614292	0.643098	3.81219	3.74796	4.12715	3.57543	3.58446	3.58386	5.07042	5.18202	4.40151	0.285811	0.29493	1.1397	1.28128	5.83793	5.84583	1.62106	4.44276	9.55005	8.80101	11.8662	10.2772	3.27763	2.42836	2.88709	3.97909	5.86994	6.26391	23.1002	-0.798636	0.740439	2.22621	2.21695
cluster4	2.55309	2.454	0.525499	0.539361	3.52646	3.88592	3.61518	3.53691	3.28764	3.66189	4.31479	4.46738	4.2194	0.252077	0.25087	1.00167	1.03352	4.92231	4.67407	1.38288	4.73828	7.31316	6.96475	9.37757	8.49971	3.22786	2.35698	2.72414	4.10774	5.61764	5.89917	13.9002	-0.83164	0.811186	3.87266	2.58492
cluster2	2.57812	2.10412	0.64825	0.516633	3.99563	4.0038	3.76228	3.60084	3.47689	3.76796	4.81387	5.16215	4.24729	0.294219	0.343874	1.24543	0.986709	6.10897	5.60162	1.593	5.98065	9.97097	8.50617	10.6043	9.54443	3.69092	2.39859	2.58687	4.17536	7.18872	6.27658	17.0716	-0.803351	0.750546	2.61928	1.94162
cluster2	2.28552	2.3031	0.533405	0.522052	3.08832	3.50854	3.29383	3.53897	2.76016	3.12013	3.99952	4.06184	3.963	0.249372	0.244201	1.05441	1.09166	4.50692	4.20699	1.28125	4.10945	6.23414	5.70792	7.28239	6.64769	2.97757	2.24607	2.78368	3.38281	5.04019	4.6351	17.8145	-0.845784	0.841506	3.35085	3.99566
cluster4	2.61834	2.36975	0.556691	0.522429	3.91823	4.19577	3.74751	4.10715	3.42355	3.71943	4.70347	4.88535	3.9764	0.286474	0.282449	1.11464	1.10025	5.82717	5.37732	1.4712	4.56777	8.66223	8.75533	10.8565	10.7253	2.90338	2.41262	2.70533	4.18063	6.25847	6.38594	18.9573	-0.82221	0.790973	2.75125	2.55232
cluster4	2.95948	2.45458	0.649249	0.561926	4.18685	4.03414	3.83542	3.60021	3.53119	3.9594	4.23028	4.53837	4.42275	0.270212	0.289311	1.22265	1.086	5.78825	4.83954	1.5575	4.57123	8.11664	7.39032	9.84939	9.94617	3.22341	2.97199	3.07101	3.76201	6.37206	6.32968	14.7431	-0.85757	0.866773	3.954	3.608
cluster2	2.20776	2.21566	0.512464	0.485489	3.57853	4.15355	4.28886	3.9343	3.29154	3.74618	4.08512	4.30534	3.87389	0.251404	0.269711	1.10108	1.01532	6.05771	5.66431	1.40793	4.55816	8.63424	8.43163	10.8797	9.7457	3.02626	2.54645	2.85459	4.33868	5.66882	5.69358	23.8716	-0.836354	0.821293	3.55315	3.27152
cluster4	2.296	2.35065	0.530209	0.548606	3.44565	3.76305	3.73001	3.85249	3.03525	3.45095	4.30203	4.25839	3.90201	0.242071	0.262042	1.12212	1.03515	5.55174	4.61663	1.42814	4.43506	8.07186	6.54485	9.8188	8.60242	2.92697	2.39209	2.77813	3.51164	5.81966	5.75347	22.8716	-0.836354	0.821293	2.84179	2.91876
cluster2	2.41669	2.09958	0.557083	0.485692	4.27778	3.95043	4.48106	4.22603	3.36926	3.81237	4.72891	4.85647	4.14502	0.30127	0.284267	1.12812	1.03278	5.12365	4.82101	1.66418	4.54231	8.01072	7.74418	10.0183	9.28196	3.00865	2.46875	2.75731	5.33246	6.08444	6.10325	19.8859	-0.833997	0.81624	3.12223	2.34799
cluster4	2.81368	2.58159	0.595388	0.625276	4.17138	4.60165	3.73849	3.90823	3.40363	3.84027	5.16501	5.46175	4.44664	0.296009	0.294126	1.08193	1.10739	5.61063	5.34556	1.48498	4.83924	9.20145	8.44237	10.5284	9.13761	3.1462	2.47267	2.89609	4.01522	5.95074	5.62032	19.9716	-0.819853	0.78592	3.50559	3.31473
cluster1	2.16849	1.94024	0.533578	0.524898	4.1132	3.85867	3.97763	4.0172	3.22547	3.44412	4.48541	4.28943	3.87744	0.279977	0.265122	0.964782	0.99092	5.24767	4.8768	1.64437	5.16715	7.82707	7.83866	8.68081	9.39677	3.36671	2.29144	2.3827	4.58974	5.47218	5.65726	20.8716	-0.836354	0.821293	2.89237	3.11149
cluster2	2.07829	2.13881	0.416967	0.538818	3.17608	2.94171	3.17089	3.29466	3.28787	3.25499	4.22208	4.37233	3.85051	0.285285	0.25713	0.836485	1.01371	5.61958	5.99715	1.35334	4.44964	8.43325	8.67182	10.7613	10.6366	3.42171	2.16461	2.7174	3.97912	5.73665	6.39039	20.8716	-0.836354	0.821293	2.90489	3.31753
cluster1	2.32971	1.89112	0.520672	0.462719	3.82774	4.00333	4.03304	4.15001	3.13852	3.51453	4.03001	3.90639	3.91358	0.270311	0.272855	1.10157	0.939721	5.73368	4.5472	1.44791	3.88293	8.0545	6.2781	9.30776	7.57852	2.64493	2.52297	2.62532	3.67883	5.95484	5.53307	20.786	-0.850498	0.851613	3.71077	2.15806
cluster1	2.00568	1.89416	0.549463	0.520115	3.66481	3.9002	3.8751	4.00853	2.98107	3.53109	3.99846	4.49419	3.99314	0.289165	0.283069	1.10972	1.05022	5.25589	4.98812	1.39656	4.2125	8.4965	8.6902	9.93316	9.96562	3.13516	2.54778	2.80114	3.95018	6.35125	6.33362	20.9002	-0.83164	0.811186	3.5441	2.5271
cluster2	2.13576	2.13653	0.399851	0.454104	3.74348	3.71726	3.69794	3.75041	3.08063	3.64585	4.21133	4.90154	4.21205	0.243915	0.23293	0.846969	0.967586	5.23274	5.20922	1.44731	4.58381	8.11741	8.53336	9.87156	10.6428	2.90477	2.27413	2.67978	3.65876	5.84596	6.38881	19.8431	-0.841069	0.8314	3.10179	2.39338
cluster1	2.02166	1.98266	0.529203	0.458324	3.68901	4.04798	3.61723	4.04494	3.38628	3.7984	4.47488	4.93752	3.77186	0.279335	0.277279	0.932427	0.841246	4.93989	4.82891	1.5214	4.5754	7.15509	7.48035	9.51101	9.46491	2.79405	2.44295	2.65745	3.77573	5.20083	5.16199	23.8859	-0.418504	-0.198205	2.80915	2.51864
cluster2	2.19323	2.1591	0.474682	0.499952	3.32859	3.46482	3.54647	3.6247	2.87954	3.28759	3.04353	3.24655	3.22494	0.236105	0.22065	0.853365	0.916515	5.13309	4.43707	1.29509	3.62375	7.21827	6.35872	7.62482	7.94197	2.21581	2.13109	2.63305	3.71974	4.38059	4.86112	26.0145	-0.812781	0.770759	3.34431	3.59663
cluster2	2.55049	2.20881	0.520029	0.515573	3.82891	4.38319	3.9227	4.50687	4.10233	4.5358	4.74928	4.70103	3.67257	0.295148	0.285009	1.07832	1.0279	5.79844	5.88166	1.72608	5.44628	9.28901	9.78955	11.0921	11.257	3.42929	2.54745	2.76262	4.87779	6.04439	5.99949	21.9002	-0.460909	0.534318	3.41515	2.10126
cluster4	2.71529	2.52208	0.684358	0.672181	3.64248	3.38852	3.59361	3.67479	3.28052	3.70415	4.47041	4.35767	3.76357	0.281889	0.266436	1.34003	1.33466	5.82755	5.8847	1.45967	4.81359	8.16847	8.77501	10.7997	10.9356	3.51627	2.90165	3.07644	3.82375	7.01929	7.27906	19.8574	-0.838712	0.826346	2.4971	2.62253
cluster5	2.56875	2.62045	0.606146	0.672655	3.95971	4.21082	3.68243	3.98945	3.5658	3.92986	4.80784	4.77678	4.10646	0.325179	0.337872	1.11162	1.20245	5.39942	5.09136	1.66474	4.57965	7.90377	8.19171	9.61695	10.6348	3.03644	2.48459	2.90847	4.5729	6.34914	6.58184	26.9573	-0.82221	0.790973	3.41498	2.06582
cluster5	2.39768	2.64267	0.63041	0.6777	4.04539	3.69586	3.54359	3.69645	3.21031	3.33256	4.51764	4.43264	4.15747	0.321862	0.306421	1.15461	1.35824	5.3645	5.33197	1.40588	3.8551	7.27082	7.3952	8.80773	8.00907	3.1015	2.57402	3.23278	3.89894	6.05984	6.5239	18.8716	0.187907	-0.0640754	3.39969	2.31457
cluster2	2.31044	2.11476	0.545731	0.515795	3.65833	4.02344	3.47057	3.61214	3.44157	3.82102	4.57274	4.44938	3.78869	0.28462	0.283192	1.07566	1.01032	5.31112	5.25857	1.52901	4.94438	7.80778	7.29039	9.55404	9.15222	3.42891	2.39146	2.77368	4.04988	5.94292	5.94802	18.9002	-0.559386	1.4609	3.77736	2.07156
cluster3	3.24761	2.9606	0.72081	0.749078	4.72693	4.87987	4.74097	4.78047	3.72822	4.37201	5.91158	6.10737	4.5956	0.325701	0.317563	1.35794	1.47107	6.78368	5.99572	1.84509	5.00009	9.32794	8.46813	10.614	10.2049	3.43998	2.8405	3.20931	5.78392	7.03343	7.12842	16.043	-1.25649	1.85291	2.4355	2.46194
cluster1	2.36228	1.92187	0.522011	0.426442	4.03334	4.67694	4.07206	4.56184	3.40275	3.83072	5.04716	5.00658	3.90478	0.274141	0.29444	0.995654	0.87902	5.95928	5.39411	1.74175	5.18646	9.12669	8.33437	11.7092	10.3739	3.33594	2.4322	2.53699	4.61313	5.58651	5.76821	21.9288	-0.826925	0.80108	3.01356	2.20153
cluster2	2.45091	2.22169	0.548473	0.534154	3.3845	3.68686	3.78523	3.70302	3.28287	3.73969	3.71	3.93048	3.45407	0.247406	0.243019	0.957412	0.958136	3.80887	4.07601	1.30381	4.47032	5.95509	5.99816	7.08295	7.36599	2.79016	2.20363	2.53414	3.92778	5.25882	5.30427	22.9716	-1.02208	-0.887734	3.56506	2.72655
cluster2	2.3575	2.31361	0.492296	0.548408	4.57778	4.47406	4.18181	4.10561	3.47572	4.07111	5.02528	5.41028	4.25021	0.304927	0.29211	0.917692	1.10986	5.60791	5.37331	1.58051	5.63175	8.78051	8.88719	11.9305	11.3966	3.74724	2.40721	2.86394	4.62369	5.92441	6.40671	24.8716	-0.836354	0.821293	2.84884	2.22909
cluster5	2.7646	2.59958	0.668288	0.644516	4.18992	4.30469	3.74353	4.13454	3.31499	3.61059	5.08689	5.22979	4.15422	0.315477	0.317969	1.26912	1.15518	5.23446	4.7892	1.49114	4.94078	8.81036	7.47944	10.2897	9.50505	3.11208	2.36747	2.65122	4.56626	6.23549	5.78481	21.0002	-0.815138	0.775813	2.5611	2.02838
cluster3	3.03426	2.90792	0.721437	0.77949	4.83672	4.62335	4.54748	4.66109	4.1489	4.54827	5.94961	5.99165	4.28346	0.357424	0.33519	1.43052	1.59734	5.55746	5.5824	1.80818	5.43144	8.6628	8.76051	11.547	11.5694	3.50757	2.62346	3.13195	5.02027	6.79018	6.88345	26.0573	-0.805709	0.755599	2.20486	2.34955
cluster1	2.247	1.96186	0.538303	0.475972	3.68099	3.43772	3.58573	3.74144	3.27417	3.24544	4.18694	4.11017	3.76867	0.292005	0.282807	1.01171	0.945833	5.8865	5.14007	1.51624	4.22933	7.84464	7.08197	10.2887	8.95588	2.95655	2.37587	2.60405	3.84561	5.9011	5.501	21.9716	-0.819853	0.78592	2.60333	3.4842
cluster1	1.66711	1.5973	0.334333	0.351956	2.86988	3.36892	3.3803	3.66986	3.24901	3.82676	3.54752	3.77516	3.52565	0.216428	0.217571	0.53643	0.64492	4.36957	4.55023	1.30937	5.24415	6.33737	6.72677	8.86983	8.53713	3.42983	1.99733	2.33008	3.74747	3.96196	4.64213	22.8859	-0.833997	0.81624	3.53189	2.92062
cluster2	2.50312	2.16352	0.617276	0.546305	3.58068	3.51505	4.05838	3.95589	3.13735	3.31545	4.51105	4.33323	3.88034	0.235563	0.267555	1.22964	1.04618	6.4037	5.22673	1.44598	5.689	9.16457	7.69151	10.4041	9.89906	3.35784	2.60535	2.76125	3.52239	5.998	5.98473	21.9288	-0.525936	1.07972	3.15377	2.61583
cluster1	2.30794	2.01296	0.543387	0.50553	3.10234	3.67848	3.36563	3.5649	2.92203	3.4301	4.1232	4.35397	3.9298	0.233359	0.234335	0.958295	0.9482	5.25406	4.83157	1.25953	3.98211	7.69607	6.96913	8.54877	7.67694	2.98753	2.20537	2.5897	3.19787	5.70071	5.83516	22.8431	-0.295528	1.5958	3.48994	3.33994
cluster2	2.44087	2.26951	0.555866	0.593721	3.40074	4.19864	3.68398	4.10309	3.3444	3.86788	4.68141	4.86192	4.1397	0.314664	0.315171	1.11591	1.15437	5.60289	5.66631	1.80733	4.46565	7.55761	7.48342	10.2044	9.59265	3.46086	2.60599	2.95003	4.07975	6.52275	6.43909	22.0288	-0.810423	0.765706	2.54285	2.07949
cluster1	2.21465	1.95138	0.593137	0.699858	3.36619	3.86593	3.59276	4.11268	3.29737	3.78699	4.11549	3.97726	3.70803	0.29978	0.312919	1.13692	1.25039	5.49842	5.17147	1.4064	5.43919	8.33747	8.36484	9.33807	9.45871	3.20434	2.45931	2.79375	4.4617	6.75403	6.67191	24.7717	-0.852856	0.856666	3.21545	2.11057
cluster4	2.51377	2.51516	0.629953	0.621784	3.43099	3.81735	3.417	3.82252	2.95086	3.52829	5.42101	5.83437	4.42787	0.298855	0.282495	1.22705	1.20067	4.74115	5.05622	1.5783	5.52728	6.85564	7.73367	8.6502	9.5532	3.2665	2.31665	2.80542	3.81356	6.26429	6.5174	23.9431	-0.824567	0.796026	2.81292	2.35812
cluster2	2.48327	2.15991	0.524252	0.508506	3.23027	3.56298	3.6156	3.69911	3.16887	3.45115	4.04444	4.07863	3.96992	0.257915	0.258402	1.03879	0.950172	5.83064	5.71022	1.43274	4.85347	8.42859	8.05545	9.58989	8.93116	3.316	2.52594	2.80595	3.59539	5.3024	5.41777	22.8002	-0.848141	0.0547344	3.76384	3.07026
cluster2	2.27367	2.11992	0.481081	0.495849	3.47637	3.71405	3.31668	3.86539	3.05388	3.22953	4.7934	4.81288	4.01345	0.259064	0.279644	1.03986	1.0559	5.83338	5.16033	1.50881	3.42831	7.88073	7.26408	9.19175	7.09127	2.86197	2.25372	2.66965	3.73874	6.14569	6.35905	20.0573	-1.21957	0.422544	2.53124	2.65399
cluster4	2.61796	2.46623	0.536347	0.578968	3.17719	3.64052	3.50329	3.79722	3.00277	3.55991	4.37445	4.36371	4.18949	0.26738	0.25837	0.958423	1.13252	4.46924	4.99902	1.50846	4.51938	6.3907	6.67054	8.7471	9.07752	3.12352	2.31806	2.97559	3.3522	5.46221	5.34986	21.0002	-0.645832	0.248455	3.06598	2.64992
cluster4	2.65156	2.50035	0.607657	0.59952	3.18743	3.51228	3.6179	3.74947	3.22056	3.29243	4.507	4.38567	4.23973	0.292619	0.301117	1.13659	1.11894	5.75425	5.25189	1.43843	4.0416	7.96815	7.30586	9.52814	8.49418	3.15248	2.48807	2.88575	3.61871	5.85902	6.21717	23.8288	-0.580062	2.75227	3.55296	2.73902
cluster5	2.90678	2.59292	0.696666	0.642352	3.752	4.16291	3.84417	4.04172	3.31968	3.48091	5.64367	5.49554	4.45636	0.304864	0.324998	1.24444	1.17951	6.06447	5.45681	1.71468	4.61148	8.31753	7.49037	9.23259	9.15975	3.41913	2.52585	2.76919	4.56596	6.50784	6.46324	22.2002	-0.51877	0.515939	2.43363	2.14606
cluster2	2.42291	2.28448	0.54682	0.563932	3.40057	3.66002	3.94407	4.03689	3.13585	3.5427	3.33645	3.38747	3.40113	0.257323	0.258361	1.07035	1.14035	4.89337	4.99082	1.30433	4.6814	7.85927	8.30015	9.99237	9.92491	2.99209	2.52849	2.85871	4.13332	5.82603	6.57915	24.7288	1.77372	-0.305006	4.04699	2.61541
cluster2	2.1224	2.15045	0.482431	0.527541	3.17897	3.84478	3.32777	3.91441	3.45494	3.64091	5.53992	5.47003	4.53473	0.290806	0.290031	0.894135	0.964115	4.51924	4.65826	1.69987	4.04332	6.50663	6.68335	7.55412	7.48736	3.03279	2.09752	2.62955	3.82768	5.0577	5.10813	19.9859	-0.648189	2.58874	3.41503	2.08559
cluster2	2.41648	2.28635	0.462483	0.498946	3.4196	3.63275	4.03505	3.67372	3.15386	3.58204	3.77658	3.82077	3.91987	0.236476	0.237192	0.894224	0.940258	4.01252	3.93091	1.16903	4.12676	5.92239	6.56001	7.07851	7.69613	2.62108	2.38445	2.76801	3.70055	5.44783	5.52766	19.8002	-1.16794	1.39506	3.50584	2.67428
cluster2	2.37309	2.22093	0.550156	0.555094	3.86207	4.00271	3.4184	3.83922	3.0474	3.73431	4.29114	4.37003	3.77982	0.250494	0.259662	1.01304	1.00806	6.21823	5.47939	1.48933	3.83628	8.94685	7.80378	11.0437	9.09668	2.99635	2.31168	2.70269	3.87007	5.67618	5.80458	21.9288	-0.826925	0.80108	3.64703	2.54701
cluster1	1.63845	1.72119	0.409691	0.421153	3.21993	3.81794	3.43225	3.80512	2.96494	3.52627	3.81508	3.99828	3.74925	0.304874	0.292332	0.728617	0.774119	3.91667	4.42019	1.36444	3.98475	5.57067	6.51842	7.41645	7.66913	2.99888	1.84507	2.34216	3.64297	4.87651	4.41506	23.8288	-0.956297	1.00715	2.97428	2.8056
cluster2	2.19358	2.16102	0.365678	0.392398	3.02877	3.47595	3.23759	3.65114	3.47094	3.68698	4.63066	5.02031	4.38391	0.282698	0.256386	0.606293	0.694809	4.03989	4.98774	1.22278	4.6739	6.12703	7.09692	8.73163	8.99616	3.30498	2.11531	2.57568	3.38241	4.3759	4.72523	24.9431	-0.504767	0.552926	2.66173	2.57732
cluster2	2.45562	2.23716	0.620233	0.57301	3.94199	4.01884	4.13423	3.89048	3.43933	3.95929	4.92516	4.9497	4.28124	0.266569	0.288673	1.15234	1.1107	5.28412	4.92097	1.41693	3.78167	7.39121	7.35068	8.60078	7.99003	3.08849	2.38577	2.71833	3.98354	6.03287	5.92174	19.9716	-1.23371	0.506837	3.36466	2.68106
cluster4	2.52023	2.37979	0.58528	0.574525	3.94968	4.238	3.98765	3.93635	3.03413	3.54307	4.73411	4.94999	4.26604	0.307377	0.281501	1.22228	1.2043	5.42491	5.65241	1.48982	5.60471	7.71261	7.63695	9.8273	9.1841	3.48019	2.52513	2.92676	4.26019	6.33422	5.88826	20.0288	-1.13022	5.09232	2.7518	2.99871
cluster2	2.67971	2.26016	0.551217	0.498779	3.67278	4.2143	3.22535	3.76092	3.20106	3.47049	5.67106	5.79366	4.3357	0.297142	0.309566	1.08095	0.983447	5.73953	5.54345	1.58611	4.41716	7.77772	7.73312	8.96183	8.07551	3.36563	2.42687	2.65691	4.33667	5.96352	5.67334	20.1716	-0.485861	1.80341	2.6189	1.96695
cluster2	2.35768	2.21096	0.555288	0.530789	3.3489	3.4821	3.73311	3.9048	3.50543	4.02498	3.60763	3.81098	4.04815	0.253153	0.254252	0.897679	0.987195	4.83416	5.06375	1.51416	5.25639	7.56088	7.3318	9.40453	9.09701	3.46594	2.45337	2.96006	3.663	5.02784	5.32478	19.9145	-0.829282	0.419105	3.98969	3.08781
cluster1	2.64337	1.97162	0.528818	0.465433	3.66288	3.64456	3.49102	3.65779	3.68623	3.90792	4.47772	4.35504	4.00845	0.245049	0.254258	0.92706	0.809823	5.07837	4.56273	1.4109	5.2319	8.16272	7.56312	9.30819	9.17996	3.21027	2.18165	2.48121	3.69198	5.62145	5.47292	19.8431	-0.502457	0.250069	3.73197	2.69687
cluster2	2.44913	2.1466	0.571571	0.491408	3.89706	4.08178	3.80539	3.93323	3.58498	3.80262	4.37009	4.32785	3.84713	0.263924	0.281474	1.14247	1.08945	5.81589	5.17678	1.73867	5.14	9.15461	7.72302	10.7277	9.24935	3.40391	2.56224	2.96455	3.99961	6.65939	6.46773	20.786	-0.737628	2.35364	2.86921	2.06985
cluster4	2.48342	2.45706	0.573084	0.624914	3.60873	3.96631	3.17731	3.97979	3.53178	4.1065	4.97428	5.13625	4.49312	0.297905	0.296137	1.07418	1.19341	5.17057	5.06073	1.61839	5.00279	7.35895	7.51645	8.796	9.41339	3.43952	2.37938	2.82371	4.18024	5.36986	5.86814	20.9716	-0.819853	0.78592	3.36035	2.77202
cluster4	2.46085	2.33211	0.562886	0.628594	4.58838	4.65778	4.02867	4.36694	3.80009	4.03176	5.53016	5.77946	4.02022	0.351649	0.319832	0.993371	1.15803	6.64143	6.20052	1.71812	5.51999	9.30782	9.16963	11.6709	11.8278	3.46312	2.45801	2.87335	4.47942	6.05621	6.1757	20.0002	-0.815138	0.775813	2.70923	3.11341
cluster2	2.54898	2.31905	0.612249	0.623035	3.79685	4.07922	3.76151	3.86924	3.26357	3.86583	4.40711	4.4238	3.98774	0.282029	0.248699	1.00311	1.12861	4.51347	4.76248	1.53497	4.59271	6.21766	7.37317	7.55179	9.18118	2.95155	2.1781	2.73002	4.01915	5.04607	5.65696	18.8431	-1.80047	0.498345	3.10683	2.16464
cluster4	2.76589	2.48323	0.610551	0.643658	5.50569	5.94641	4.14955	4.16749	3.97568	4.17385	3.98698	3.59485	3.67772	0.297268	0.305633	1.11148	1.15251	5.90094	5.39965	1.50257	4.77355	8.51694	8.51296	11.3611	10.5032	3.39544	2.5989	2.8589	4.38022	6.10564	6.09899	24.9145	-0.829282	0.806133	3.80497	2.98329
cluster2	2.62308	2.27766	0.624425	0.589757	4.32905	4.312	3.94017	4.2483	3.29565	3.53228	5.12998	5.06218	4.10594	0.320496	0.314057	1.05094	1.08758	5.73585	5.86049	1.7107	4.6472	9.0013	8.53958	11.3976	10.9597	3.33322	2.40846	2.71921	4.61166	6.02371	6.68418	22.043	-0.996184	0.787418	3.0096	2.58561
cluster1	2.45548	1.98347	0.546742	0.430484	3.60674	4.19754	3.68216	4.12912	3.5818	3.97976	4.08115	3.95096	4.01471	0.301166	0.32232	1.22116	0.926017	5.94079	5.2887	1.76957	5.1917	8.66876	7.7292	10.8183	9.1711	3.56384	2.72586	2.76942	3.87409	6.30121	5.55272	20.8716	-1.68477	1.40578	3.31683	2.60557
cluster2	2.11306	2.16715	0.610018	0.638939	4.1054	3.56414	4.13578	4.21855	3.24446	3.68457	3.95015	3.8214	3.36934	0.284424	0.302783	1.2084	1.34107	6.28293	5.43426	1.79906	4.94608	9.89618	8.17582	10.5344	9.34097	3.27376	2.37363	2.89499	4.26051	6.79441	7.2333	19.9002	-1.35837	0.927906	3.07031	2.32461
cluster5	3.07783	2.76101	0.716598	0.675021	4.13278	4.03091	3.76984	4.01065	3.53525	3.67232	5.38881	5.15544	4.36047	0.322754	0.343276	1.50068	1.39288	6.42859	6.21586	1.68248	5.58094	9.59797	9.15825	11.7723	10.0658	3.93028	2.95209	3.24521	4.37975	7.38743	7.10924	21.1002	-1.3818	0.551312	2.53629	2.12318
cluster2	2.31926	2.12346	0.454455	0.390211	3.54043	3.36548	2.99786	3.06905	3.06512	3.6323	3.7568	3.7572	3.55631	0.200849	0.190027	0.743092	0.756059	4.50513	4.33447	0.956445	4.6115	6.74345	6.52327	8.45595	8.67393	2.76959	2.24976	2.60214	3.96883	4.01724	4.28337	19.8574	0.534548	0.167654	3.88618	3.31115
cluster4	2.68834	2.528	0.638501	0.582674	3.9386	3.62922	3.70549	3.69633	3.3948	3.85563	5.23762	5.22723	3.90536	0.295632	0.308667	1.24565	1.14635	5.42279	5.05076	1.61379	4.84381	8.12504	7.35636	10.5543	9.48305	3.25655	2.50851	2.85345	4.592	5.84745	5.8596	21.9002	-0.963322	1.03585	2.97207	2.19379
cluster5	2.61887	2.58325	0.682387	0.740186	4.06409	4.20061	4.16316	4.40107	3.75063	4.07901	5.45746	5.64364	4.2566	0.338934	0.340706	1.44354	1.52758	6.7722	6.15284	1.97992	5.88042	9.04934	9.17914	9.95619	10.931	3.94451	2.75852	3.08909	4.85063	6.80372	7.15708	20.1145	-1.59014	0.735386	2.14053	2.03043
cluster1	2.30079	1.97501	0.517711	0.510101	3.48552	3.42387	3.68804	3.61563	3.22317	3.37987	4.23479	4.24128	3.6394	0.294893	0.285812	1.06855	0.986004	5.08204	4.49474	1.44862	4.12612	7.32461	6.57384	9.17117	7.68572	2.80879	2.3365	2.56805	3.79508	5.96452	6.01883	20.9145	-0.829282	0.806133	2.691	2.51815
cluster2	2.58021	2.32839	0.54678	0.52761	4.15093	4.49645	3.9775	4.43624	3.88989	4.05996	4.89951	4.93429	4.16092	0.289977	0.292519	1.01781	1.03522	5.38498	5.11019	1.74261	4.61778	8.19544	8.07919	10.9728	10.4403	2.81236	2.41372	2.74019	4.7649	6.43493	6.67725	18.8002	-0.848141	0.84656	4.03044	3.2746
cluster3	3.39736	3.02786	0.901084	0.90688	3.96037	3.88578	4.09126	3.94956	3.67041	3.93599	5.06797	5.10882	3.72043	0.366716	0.361808	1.50498	1.50762	6.11864	5.67255	1.64274	5.41195	9.84721	9.29533	11.3002	11.647	3.29655	2.76189	3.19102	4.05648	6.91633	6.66244	23.9431	-0.824567	0.796026	2.84332	2.19896
cluster2	2.3457	2.06707	0.607633	0.607794	3.82172	3.84517	3.63837	3.37082	3.28115	3.66521	4.29706	3.77936	3.51895	0.259103	0.26612	1.04694	1.0793	5.91871	5.54801	1.46643	5.31971	8.84228	7.52795	9.83646	8.2568	3.43231	2.31616	2.80449	3.75659	6.296	6.47401	19.7717	-0.852856	0.856666	3.62604	3.12886
cluster2	2.28924	2.07033	0.572066	0.527746	3.98612	4.12648	4.14085	3.94291	3.53344	3.90623	4.83725	4.90438	4.16394	0.281941	0.281987	1.06235	0.991616	4.90904	4.85327	1.65717	3.9895	7.31259	6.72402	9.02485	9.13506	2.63818	2.3561	2.72551	4.11323	6.27724	5.94877	24.9145	-0.960965	-0.124223	2.77491	3.2991
cluster2	2.43052	2.24854	0.424693	0.414598	4.40369	4.28804	4.5891	4.21451	3.74598	4.01974	4.18757	4.38421	3.91397	0.252672	0.262168	0.724136	0.77312	5.53912	4.99952	1.61424	5.20093	7.96957	7.50038	10.5207	10.234	3.13443	2.33831	2.7698	4.39101	5.5166	5.20658	18.8574	-0.838712	0.826346	3.57014	2.1464
cluster1	2.21513	2.05965	0.45197	0.437838	3.52887	3.66291	3.51037	3.66329	3.34737	4.06367	4.7523	4.85982	4.18181	0.286857	0.296808	0.926017	0.824606	4.88901	4.98545	1.85682	4.6938	7.68617	7.51349	9.15861	8.83305	2.98679	2.25384	2.65012	4.03825	5.37919	5.28598	19.786	-0.850498	0.851613	2.92628	2.03026
cluster2	2.38935	2.14145	0.571208	0.562362	3.8225	4.07104	3.49988	4.18176	3.1072	3.54085	5.69545	5.9285	4.73537	0.300524	0.312379	1.1662	1.02459	5.37922	4.99621	1.76326	4.64155	7.98606	6.94681	9.24732	8.60169	2.87601	2.3126	2.54854	4.68581	6.04024	5.80931	20.9288	-0.826925	0.80108	2.58495	2.55045
cluster1	2.46059	1.90232	0.643066	0.462711	3.65563	3.66056	4.26284	3.89055	3.29749	3.82015	4.36533	3.77426	3.79412	0.240892	0.283733	1.13332	0.77669	5.24802	3.86063	1.38726	4.683	7.94333	5.93226	9.12672	7.2451	3.07631	2.37622	2.54235	3.79103	5.70094	4.54032	19.786	-1.65376	1.72395	3.74429	2.93115
cluster4	2.57729	2.52743	0.580345	0.633027	2.97416	3.73889	3.5207	3.86703	2.70859	3.36635	4.0238	4.20144	3.9862	0.281426	0.262541	1.1459	1.18653	5.46611	5.48981	1.40678	4.75272	8.05764	8.58771	9.30955	9.67913	3.22068	2.34874	2.78192	3.98941	5.88238	6.5348	22.0145	-0.982087	2.6506	3.0763	2.59556
cluster5	3.04497	2.7573	0.69043	0.658883	3.90938	4.38149	3.90352	4.18983	3.5531	3.94376	5.83809	5.93487	4.6118	0.316006	0.314162	1.35086	1.25681	6.34289	5.99687	1.83101	5.61352	8.81982	9.04291	10.8605	10.0295	3.71533	2.68285	2.92242	4.48342	6.54088	6.37908	23.2144	-0.779778	0.700013	2.54836	2.71407
cluster1	2.2289	2.02986	0.47203	0.461882	4.23575	4.12265	4.10566	4.34921	3.20865	3.72724	4.61135	4.69742	4.04291	0.258229	0.271899	1.02269	1.06265	6.10581	5.64336	1.60606	4.79264	8.36308	8.04179	9.47804	8.48409	3.05452	2.31642	2.58464	4.44682	6.45604	6.38701	20.0145	-0.812781	0.770759	2.79808	2.12284
cluster2	2.4558	2.29311	0.632196	0.611531	4.10365	4.30602	3.7135	3.88879	3.46681	3.80223	4.60387	4.60243	3.73213	0.31581	0.309606	1.22627	1.15683	6.06276	5.49677	1.44438	3.83144	8.58927	8.65331	11.3203	10.7993	2.56892	2.58715	2.83374	4.06105	6.61249	6.77127	24.9716	-0.819853	0.78592	4.1595	2.93421
cluster1	1.94567	1.93999	0.508363	0.514785	3.7048	3.6447	3.25294	3.62984	3.34443	3.75354	4.08967	4.31656	3.85595	0.248887	0.24872	1.03632	1.03087	5.35424	5.4812	1.55415	4.83129	8.0334	8.45127	9.91081	9.5219	3.21229	2.26769	2.48907	4.7107	6.3347	5.90345	22.9859	-1.34422	1.2754	2.84417	2.11728
cluster2	2.19316	2.32264	0.465689	0.566463	3.51176	3.56603	3.77806	3.82914	3.09141	3.33403	4.6104	4.94382	4.00761	0.284178	0.278832	1.07007	1.1565	6.0628	5.91663	1.48623	5.26486	8.69149	8.54828	11.1664	9.8586	3.66756	2.5686	2.92726	4.39917	6.41065	6.05901	24.0145	-0.812781	0.770759	2.30604	2.23522
cluster2	2.59228	2.21055	0.596951	0.556533	3.80605	3.88983	3.88963	3.99268	3.3542	3.48781	5.46506	5.11417	4.26921	0.289045	0.313589	1.3008	1.19053	6.05485	5.08075	1.62264	4.67479	8.8015	7.83304	10.1321	9.20571	2.90044	2.81389	2.97107	4.41984	6.31796	5.92588	24.9716	-0.819853	0.78592	2.48537	2.14452
cluster1	2.35774	1.92513	0.442746	0.364443	3.72214	4.34495	3.3339	4.17256	3.528	3.90905	4.26562	4.01781	3.64575	0.257278	0.260082	0.835378	0.680486	5.50211	5.09066	1.54237	4.6973	8.49397	6.91355	10.3936	8.7022	3.2864	2.42701	2.4495	4.55733	5.88813	5.21709	21.8145	-1.84657	-0.0402739	3.47434	2.63647
cluster1	2.07295	2.03607	0.573554	0.567693	5.02259	5.01055	3.70862	4.0425	3.11688	3.5503	4.55309	4.53608	3.65773	0.296614	0.314516	1.13222	1.09412	5.43176	5.28997	1.61832	4.78204	7.83301	7.36555	9.4331	8.07421	3.05095	2.14829	2.56488	4.97493	5.71439	5.66538	22.9716	-0.8951	-0.128245	3.77842	3.1395
cluster4	3.01491	2.5224	0.684542	0.58986	3.91125	3.91223	3.70173	3.47	3.37939	3.61435	5.00722	4.76243	4.0281	0.274819	0.304581	1.17969	0.979882	5.89932	5.24826	1.57675	3.94813	8.62761	7.28341	10.4355	8.26941	3.18565	2.47365	2.56869	3.92052	6.00709	5.30494	24.0002	-0.815138	0.775813	2.86217	2.95643
cluster5	2.8883	2.72366	0.617387	0.630964	4.0336	4.38165	3.74421	3.95724	3.45544	3.85558	5.65079	5.8462	4.76001	0.289272	0.310396	1.21336	1.2855	5.89789	6.57141	1.71392	5.43235	7.88493	8.87186	8.58769	9.84376	4.06848	2.72402	3.19366	4.24961	6.35442	6.37396	19.1573	-0.789207	1.37668	2.32645	2.04545
cluster2	2.43795	2.20408	0.481306	0.511072	3.37364	3.53681	2.77075	3.32017	3.2771	3.73002	3.84554	4.01978	3.75048	0.246273	0.243123	0.794863	0.898202	4.3671	4.28609	1.34558	4.77363	5.95001	6.31817	8.01884	7.998	2.90515	2.26943	2.54716	3.20557	4.98896	5.17879	20.8431	-1.048	0.404791	4.34487	2.80292
cluster2	2.53345	2.19728	0.597632	0.517044	3.76648	4.18566	4.25371	4.28588	3.67294	3.98962	5.03243	4.88138	4.04511	0.315147	0.319617	1.15027	1.06508	5.07702	4.86392	1.79735	3.49404	7.96466	7.76041	9.98047	8.26063	2.4324	2.46141	2.70125	4.37043	6.80127	6.42546	19.1145	-1.17251	1.13996	2.45072	2.11327
cluster2	2.44384	2.12941	0.568886	0.527293	3.57022	4.32923	3.38449	4.11604	3.46436	3.7635	5.00473	4.96027	4.05309	0.260124	0.27245	1.07073	0.968274	4.92642	4.81201	1.55307	4.49034	7.75439	7.16617	9.6223	8.15154	2.86112	2.37488	2.5116	4.14675	6.11046	5.41157	25.0145	-0.812781	0.770759	2.74993	1.86316
cluster2	2.52258	2.31022	0.631136	0.579284	3.78992	3.83946	3.38216	3.71508	3.22234	3.72484	5.3763	5.12062	4.50565	0.285007	0.297229	1.25947	1.15402	5.74932	5.28333	1.58282	4.3026	7.57233	6.97341	9.18313	8.09944	2.99507	2.60679	2.86713	3.9455	5.92016	5.74638	22.0002	-0.815138	0.775813	2.99973	2.36952
cluster2	2.21094	2.08707	0.519813	0.528792	3.88768	4.33528	4.25974	3.96236	3.49698	3.70526	4.46917	4.33568	3.73959	0.273774	0.263257	1.0297	1.06469	5.37857	5.51072	1.41077	4.36319	7.79823	7.8288	9.519	8.98056	3.26206	2.34799	2.63976	3.89127	5.61974	5.7087	23.8716	0.16067	0.920022	3.08457	2.7902
cluster1	1.88392	1.74469	0.379726	0.401453	3.68907	3.68423	3.93097	3.99356	3.47053	3.78427	4.01497	4.00722	3.59806	0.250169	0.246056	0.849407	0.878795	4.88576	4.98573	1.4258	4.80662	7.26691	7.85835	9.27151	8.58227	3.17454	2.30425	2.69292	3.76611	5.43365	5.08314	21.9145	-0.227305	0.581024	3.23046	2.33646
cluster1	2.2404	1.92872	0.372473	0.395862	3.43886	3.76708	3.61569	3.69726	2.78199	3.2708	4.27567	4.4983	4.08357	0.217397	0.21633	0.609495	0.685084	4.04782	4.11704	1.01752	3.76243	5.62935	5.73886	6.53289	7.06936	2.67243	1.99829	2.26288	4.01706	4.29751	4.76652	19.9288	-0.601184	0.899808	3.76978	3.39856
cluster2	2.5192	2.09736	0.557022	0.463436	3.87635	4.08881	3.68469	3.87896	3.35825	3.83685	3.77752	3.63844	3.54551	0.264292	0.271528	1.09812	0.92746	5.66867	5.77747	1.56646	5.18387	8.57326	8.12028	10.2535	9.86434	3.40617	2.33515	2.69434	3.7021	5.78816	6.02785	24.9002	-1.00095	1.01786	3.51449	2.20479
cluster2	2.50257	2.15522	0.5316	0.412346	3.22869	3.58715	3.03287	3.29841	2.99882	3.85011	4.33298	4.30202	3.52845	0.25753	0.267619	0.798904	0.810686	4.9825	4.59451	1.11439	5.03162	7.04151	7.13477	8.6309	8.85687	2.96529	2.24152	2.4954	3.86266	4.93135	4.73067	19.8859	-1.6335	0.519167	3.50639	3.06393
cluster2	2.56437	2.32033	0.55128	0.571379	3.60885	3.95179	3.59809	3.78817	3.29806	3.86531	4.09995	4.16446	4.02156	0.262668	0.274429	1.0269	1.04833	5.4094	4.8828	1.41103	4.66166	7.76379	7.19977	9.31297	9.02371	3.05084	2.53565	2.84778	3.90174	5.65688	5.601	21.7574	-1.19383	-0.423059	3.72977	3.82262
cluster2	2.47472	2.36123	0.505188	0.502709	3.51726	3.09117	3.5588	3.49595	2.89425	3.22426	4.08121	4.09669	3.67685	0.24957	0.249808	0.913004	0.938223	5.65046	5.83346	1.38648	5.10917	9.74043	9.44173	11.9472	10.3326	3.32671	2.32243	2.73718	4.11493	6.01853	5.88876	23.9002	-1.54649	0.424158	3.8412	2.96273
cluster1	2.33108	2.06247	0.474794	0.417144	3.96546	4.0168	3.84498	3.77122	3.1437	3.38855	4.26294	4.05989	3.61396	0.258157	0.271651	0.923112	0.789571	4.63253	4.08407	1.59882	3.06479	6.87015	5.60856	7.5779	5.64563	2.03521	2.14088	2.42913	3.71985	5.43183	4.8944	18.9288	-0.826925	0.80108	3.06384	2.26828
cluster4	2.52355	2.46481	0.57665	0.626285	3.56184	3.93925	3.8241	4.10614	3.39937	3.73434	4.54789	4.85138	4.15963	0.263782	0.264183	1.16589	1.18111	5.91637	5.51756	1.53624	5.09636	7.95155	7.29457	9.32636	8.98014	3.41784	2.57752	2.942	4.55362	6.29777	6.24312	23.0145	0.78622	-0.13261	3.35413	1.8506
cluster4	2.40159	2.38562	0.549601	0.558643	4.03262	4.32968	3.88548	4.38627	3.36481	3.77856	5.37061	5.56371	4.48384	0.313379	0.321254	1.12806	1.11942	6.23074	6.17514	1.69417	5.65305	8.7232	9.14723	9.85398	10.4718	3.84232	2.64767	3.07886	4.49119	6.48709	6.02437	24.8716	-1.21259	1.24386	2.60952	2.04296
cluster4	2.48085	2.38981	0.587101	0.594721	3.52718	3.94919	3.97629	3.96265	3.04999	3.26157	4.55526	5.03575	4.10413	0.294384	0.287114	1.04078	1.06264	5.64299	5.21413	1.42779	4.03827	7.65828	7.58307	8.39985	8.31381	3.13438	2.36489	2.81564	3.81881	5.71121	6.11673	18.7431	-1.49717	1.12742	2.88144	2.33353
cluster4	2.73005	2.37873	0.619103	0.536824	3.85091	3.87803	3.92981	3.95814	3.57178	3.85612	5.29777	5.27554	3.9636	0.28213	0.300834	1.15161	1.00245	6.13628	5.09852	1.7948	4.18083	8.94312	6.93397	9.53986	7.58551	2.99262	2.63227	2.7262	4.02867	6.62861	5.6679	23.9859	-1.17492	2.28289	2.79167	2.36449
cluster2	2.51625	2.24056	0.690339	0.574307	4.62234	4.10081	4.14416	4.25928	3.42645	3.69575	5.34156	5.22089	4.09833	0.306314	0.337493	1.36678	1.13421	6.39728	5.79372	1.8078	4.98773	9.26623	7.84978	10.3983	9.0359	3.55191	2.70789	2.86484	4.70308	6.74238	6.20829	21.143	-1.35592	2.29927	2.38356	2.27286
cluster2	2.24935	2.15973	0.50577	0.485475	3.95494	3.69345	3.81567	3.55431	3.16873	3.50926	4.2567	4.34319	3.95883	0.265871	0.286965	1.02915	0.968727	5.77391	5.08597	1.43402	5.3524	8.12851	7.51315	9.81445	8.96943	3.16633	2.23634	2.52908	3.8305	6.09182	5.80439	21.0145	-0.812781	0.770759	2.85679	2.70332
cluster4	2.44623	2.38179	0.516994	0.571249	3.71344	3.79059	3.67578	4.23007	3.4448	3.91841	5.25438	5.40728	4.18504	0.318883	0.307088	1.09229	1.21439	5.3035	5.30745	1.65109	5.3109	7.74171	8.23929	9.49577	10.7417	3.21118	2.33622	2.77307	4.42556	6.596	6.38321	24.0145	-0.812781	0.770759	3.25339	2.35818
cluster1	2.24303	2.04743	0.401895	0.435712	3.2843	3.84551	3.15975	3.48358	3.57402	3.76604	5.11815	5.11002	4.15511	0.275987	0.244138	0.857123	1.02156	5.36213	5.53028	1.53218	5.45133	8.64964	8.46252	10.6582	10.7492	3.47175	2.34891	2.83204	3.89183	5.56977	6.44352	20.8431	-0.841069	0.8314	2.75707	3.0235
cluster1	1.91451	1.82965	0.42372	0.439678	3.69987	3.96977	3.73309	4.05548	3.12025	3.38391	4.36164	4.36072	3.79622	0.260218	0.265958	0.853847	0.857782	4.80072	5.01467	1.55615	4.21211	6.75648	7.24852	8.8049	8.44185	3.24305	2.0239	2.50213	4.15483	5.6112	5.95163	23.9431	-0.993873	-0.208093	3.18201	2.77619
cluster2	2.72109	2.22093	0.585271	0.530576	4.01013	4.40491	3.58452	4.19652	3.42006	3.72296	4.9217	4.77626	3.81486	0.291943	0.317836	1.26025	1.05791	5.96135	5.32119	1.72053	3.99701	8.51944	6.99106	9.92934	8.22596	2.87931	2.53991	2.70952	4.71657	6.2327	5.89712	24.0859	-1.08317	2.0856	2.6211	2.48781
cluster1	2.26251	2.04475	0.546066	0.499937	3.67687	3.80616	3.40603	3.68616	3.27136	3.43983	4.13768	4.33585	3.84454	0.302706	0.288578	1.13547	0.990427	5.63875	5.37819	1.55945	4.58199	8.67327	8.35985	10.3684	9.47015	3.11029	2.25045	2.54596	3.59398	5.87546	5.55376	24.8574	-0.537723	4.34336	2.8515	2.64716
cluster1	2.03793	1.9109	0.441958	0.45068	3.62374	3.82503	3.60296	3.67792	3.11322	3.41492	4.15065	4.25307	3.87997	0.264409	0.2455	0.875611	0.939139	5.41281	5.45121	1.48656	4.92344	7.37505	7.4889	8.16214	9.00688	3.13893	2.19475	2.62651	4.36554	5.42087	5.56044	23.9002	-1.51827	0.891924	2.64162	2.27393
cluster2	2.45253	2.21481	0.624977	0.603804	3.78765	3.9788	4.10936	4.09173	3.45178	3.92025	4.31826	4.22812	3.46297	0.283863	0.293194	1.07862	1.13611	5.69839	5.41385	1.58682	4.72462	8.81167	8.65215	10.0971	10.0453	2.84689	2.22861	2.5834	4.41758	6.18435	6.72687	24.9716	-0.819853	0.78592	3.04	2.63432
cluster5	2.83588	2.81317	0.659682	0.699174	4.27136	3.92426	4.27704	4.40982	3.24326	3.74244	5.73395	5.94925	4.72145	0.334811	0.326503	1.3249	1.36894	6.23598	6.30705	1.9597	4.92482	9.01621	8.85775	10.5818	11.1516	3.60254	2.66888	3.11708	4.22569	6.17419	7.18805	22.1859	-0.784492	1.16867	2.17722	2.64259
cluster5	2.84002	2.8192	0.65122	0.680991	3.6555	4.02111	4.14126	4.05054	3.36629	3.58951	5.40283	5.65136	4.28606	0.289008	0.295748	1.22366	1.3166	5.61715	5.28026	1.81264	4.53188	7.70957	7.47726	9.49323	8.60067	3.30867	2.41951	2.822	3.93364	6.51449	6.5666	24.1573	-0.958513	0.0669312	2.12041	2.93746
cluster1	2.26961	2.03713	0.561898	0.51676	3.59719	3.92786	3.67184	3.94809	3.29401	3.69906	4.8438	5.00219	4.13058	0.306828	0.318414	1.0731	0.957186	5.62108	5.1112	1.6408	5.3297	8.28245	7.98089	9.36749	9.99676	3.04027	2.23023	2.42138	3.89756	6.72593	6.4353	18.9859	-0.817495	0.780866	2.91329	2.67054
cluster4	2.2976	2.53739	0.501151	0.564452	3.71224	3.92374	3.89971	3.99537	3.556	4.04159	4.4264	4.9254	3.81191	0.285721	0.261222	0.933138	1.08361	5.51873	6.12241	1.48378	5.70493	8.57728	9.11287	10.3811	11.5149	3.73838	2.28415	2.88524	3.91308	5.2156	5.8409	20.0859	-0.800994	0.745493	3.00968	2.47093
cluster2	2.65894	2.16449	0.541906	0.352577	3.80991	3.7876	3.88862	3.80812	3.18084	3.45336	4.43633	4.04601	3.65797	0.234485	0.268778	0.946942	0.632881	5.1841	3.81927	1.56739	4.32288	8.05586	5.46446	9.74746	7.21894	2.71773	2.35686	2.32115	4.25524	5.24606	3.72597	24.0002	-0.815138	0.775813	3.17043	3.1999
cluster2	2.37519	2.3092	0.513551	0.486294	3.91843	3.9704	4.23287	4.24735	3.45772	3.8089	4.65861	4.72451	4.21282	0.287309	0.285099	0.982027	0.995622	5.64761	5.39955	1.62855	4.09325	8.24499	8.22958	10.0129	9.405	2.85641	2.32681	2.86054	3.96027	5.84013	6.18343	21.0145	-0.662286	0.707569	3.06138	2.5304
cluster1	1.97557	1.91095	0.428043	0.406352	3.72526	3.53941	3.97701	3.47535	3.18619	3.36723	3.83093	3.55843	3.32861	0.230981	0.248416	0.880825	0.733858	5.30766	4.8519	1.47462	4.76606	8.90876	7.36564	10.8151	8.13557	3.13572	2.28445	2.46879	4.0656	5.68029	4.60707	18.7574	1.47745	1.4642	3.19438	3.01363
cluster4	2.57339	2.42993	0.61858	0.635946	4.05698	4.05373	4.05817	4.17187	3.22043	3.51662	5.12547	5.21616	4.1783	0.289678	0.300665	1.16293	1.18268	5.68007	5.55152	1.67398	5.07995	8.6523	8.35082	10.3627	10.8923	3.18965	2.45139	2.79453	3.87803	6.24383	5.90068	24.9431	-1.05031	1.21859	2.92758	2.04033
cluster2	2.61131	2.29906	0.594875	0.55736	4.12232	4.05346	3.6639	3.7547	3.17387	3.50133	4.83302	4.87767	4.18009	0.285938	0.305994	1.18796	1.10898	6.0853	5.28683	1.45867	4.60501	8.46744	7.80121	10.1103	8.96028	3.31755	2.41237	2.66543	4.65444	6.90944	6.43309	24.9716	-1.19609	2.10804	2.8835	2.64478
cluster2	2.21353	2.069	0.542003	0.530921	3.92099	3.81746	4.02411	3.8731	3.44524	3.79081	4.44276	4.38617	3.86816	0.25259	0.249383	1.07164	0.9881	5.17035	4.74098	1.33194	4.45153	7.67852	6.86408	8.96896	8.3339	2.60014	2.28631	2.5509	3.63608	5.25452	5.32271	21.9288	-0.24376	0.37807	3.90904	2.22259
cluster2	2.13135	2.2144	0.496592	0.58155	4.09629	4.49974	3.30351	3.95732	3.81599	4.2832	5.12806	5.27669	4.46623	0.299666	0.301065	0.904644	1.12505	5.00353	5.8321	1.851	5.43488	7.1581	7.95763	9.02541	9.67921	3.4853	2.16433	2.78166	3.92422	5.21794	5.99959	18.9002	-0.83164	0.811186	2.45521	1.8509
cluster4	2.72469	2.38626	0.626406	0.564222	4.44515	4.38803	4.403	4.4834	3.33829	3.72846	5.62886	5.69627	4.26802	0.302983	0.313608	1.21947	1.1187	5.71584	5.5142	1.82512	5.15236	8.26902	8.36714	10.2425	10.5015	2.99838	2.8463	3.05342	4.9376	6.90056	6.23867	19.9716	-0.819853	2.03607	3.0443	2.52698
cluster1	2.39824	2.02152	0.595089	0.545729	3.28387	3.5695	3.55227	3.77097	2.74352	2.99571	4.22885	4.32279	3.84806	0.264311	0.292989	1.19421	1.09089	4.86482	4.32213	1.50025	4.27167	7.33218	7.00243	8.75993	8.96654	2.66403	2.23073	2.44551	3.34739	6.07705	5.62428	19.8716	-0.836354	0.821293	2.70858	2.73608
cluster4	2.58953	2.4338	0.548517	0.560039	3.96456	4.38943	4.17059	4.23331	3.41854	3.7174	5.73265	5.75736	4.4248	0.290209	0.309129	1.15514	1.20394	5.55348	5.89683	1.86946	5.32793	8.57289	9.01072	9.82277	10.4889	3.67574	2.56679	2.89328	4.75509	6.51908	6.56393	24.0716	-0.859786	0.93923	2.4457	2.25064
cluster5	2.85984	2.62465	0.51983	0.535783	3.57238	3.80212	4.10731	4.01847	3.16142	3.47357	4.90995	5.00157	4.20234	0.259589	0.265444	0.944284	1.05972	4.87679	4.75526	1.48071	4.63422	7.24235	7.24088	8.61294	8.78888	3.17045	2.49931	2.93327	3.94438	5.57322	5.45805	21.9002	-0.286098	0.0337537	3.61005	2.75892
cluster2	2.31521	2.11144	0.528641	0.535843	3.70555	3.99914	3.80662	3.92855	3.62967	4.09785	4.9599	5.09321	4.12091	0.297853	0.291287	1.06074	1.01704	5.31496	5.48976	1.73835	4.48146	8.07364	8.32661	10.5022	10.7356	3.45552	2.55878	2.82933	4.44694	6.09778	6.34317	22.9288	-0.996231	0.153182	2.59783	2.15237
cluster4	2.53936	2.38224	0.663146	0.63538	4.0363	4.35936	3.99617	3.77914	3.65606	4.1756	4.51223	4.56492	4.16454	0.279292	0.276846	1.18899	1.17751	5.80972	5.7482	1.56052	4.83842	9.06799	8.44599	10.4429	10.108	3.28243	2.52763	2.85532	4.21202	6.46499	6.68328	22.9145	-0.829282	0.806133	2.4362	2.30799
cluster4	2.73384	2.51168	0.672158	0.649615	3.17174	4.02778	3.73833	3.96321	3.13774	4.00862	5.14056	5.28043	4.54493	0.30908	0.307412	1.29972	1.26119	5.50541	5.66252	1.61594	4.9422	8.23838	8.5207	10.5997	9.79781	3.34546	2.78674	3.02685	3.83498	6.53769	6.45367	23.9716	-0.518864	2.55781	3.16531	2.17668
cluster1	2.41432	1.91912	0.489815	0.556015	3.41124	3.42108	3.666	3.85367	3.01844	3.53539	4.21882	4.32771	3.62633	0.29005	0.26474	0.805493	1.15034	5.14879	5.24429	1.62747	4.82012	8.02572	7.98982	9.72706	9.58004	3.18469	2.44889	2.8595	3.75063	5.49613	6.58454	20.9431	-0.241403	0.822791	3.37558	2.09517
cluster2	2.17924	2.14439	0.452295	0.552231	3.27172	3.71638	3.4264	3.76179	2.95702	3.2293	4.80748	4.95703	4.26268	0.306602	0.297944	0.857891	1.04591	5.00952	5.02395	1.60837	4.78183	7.71245	8.28422	9.40832	9.72764	3.25149	2.08834	2.63269	3.65925	5.50835	5.982	20.8574	-0.368417	0.601237	3.15333	2.36714
cluster4	2.86375	2.54433	0.594921	0.460192	3.78629	3.82714	3.7151	3.79054	3.28215	3.67857	5.12851	5.50776	4.00467	0.272427	0.298423	1.10329	0.873496	5.94062	5.06457	1.56177	4.78732	8.78554	7.28277	10.5549	9.53029	3.16313	2.75052	2.94594	3.56699	5.78876	5.71387	18.9288	-0.826925	0.80108	2.80443	2.28972
cluster2	2.49014	2.32807	0.454918	0.423023	3.80109	4.13869	4.13698	4.23429	3.44975	4.1646	4.53427	4.59877	4.19768	0.278528	0.269149	0.827971	0.791	4.96655	5.31199	1.45298	4.48932	6.5369	7.94827	8.64172	9.50376	3.16595	2.34712	2.78451	4.05832	5.00628	5.11831	23.8002	-0.848141	0.84656	3.57307	3.81108
cluster2	2.47319	2.30371	0.586584	0.571214	3.85171	4.36289	3.86126	4.07601	3.31541	3.72496	4.53139	4.53141	3.8733	0.282352	0.281335	1.14518	1.06234	6.07537	5.40252	1.63683	5.14414	8.41006	7.94567	9.79545	10.8356	3.59549	2.4594	2.71793	4.68314	6.30377	6.14186	20.9859	-0.817495	0.780866	3.14705	2.926
cluster3	2.92072	2.86723	0.691227	0.765476	4.49043	4.35031	4.50656	4.47386	3.88575	4.51516	5.64744	6.10732	4.28398	0.335524	0.324682	1.22048	1.39641	5.62674	5.96857	1.70676	5.50434	7.82683	8.82246	9.48813	10.0749	3.6676	2.56464	3.16696	5.38833	6.39589	6.83843	20.1002	-1.19368	1.41488	2.37693	1.92235
cluster2	2.38157	2.16079	0.605825	0.598122	3.30165	3.51309	3.88589	3.82806	3.42883	3.80593	4.20388	4.36554	3.58641	0.270791	0.279921	1.16399	1.22495	5.56224	5.21208	1.36412	4.34951	7.69258	7.75824	9.24232	8.88759	3.0486	2.46702	2.91545	3.47015	5.63818	5.8929	23.9145	-1.26195	0.976826	3.50333	3.14834
cluster1	2.20553	2.06393	0.538162	0.530562	4.07919	4.13122	4.4257	4.11023	3.83423	4.20197	5.16406	5.33389	4.32066	0.313303	0.296725	1.08716	1.07588	6.1381	5.7362	1.51376	4.8305	9.48959	8.9281	10.1052	10.5246	3.00981	2.61287	2.95968	4.17852	6.68177	6.62672	19.8288	-0.937485	0.917191	3.28654	2.21663
cluster2	2.45899	2.32013	0.554737	0.556737	3.8667	4.01416	4.09007	4.02607	3.78924	4.10366	4.91055	4.88358	3.85569	0.304033	0.300221	1.08706	1.08461	5.95945	5.15804	1.73826	5.25476	8.75807	8.45109	10.6927	10.4595	3.57811	2.61304	2.90788	4.08874	6.81794	6.69058	20.7717	-1.0786	0.397674	3.37403	2.04409
cluster1	2.01539	1.92604	0.463617	0.463857	4.00939	4.00818	4.05676	4.19639	3.03822	3.61889	4.46575	4.508	3.74984	0.288016	0.288777	1.00035	0.948173	5.52797	5.12037	1.7798	4.30119	8.04024	7.77528	8.88713	8.78485	2.7649	2.12602	2.40635	4.38505	5.7506	5.77239	18.9573	-0.709339	2.07711	3.6972	2.64595
cluster2	2.11865	2.15138	0.464034	0.473726	3.53965	3.40374	3.6601	3.75101	3.35959	3.77051	3.8309	4.15744	3.86854	0.259599	0.25868	0.897278	0.911838	4.79492	5.1093	1.43794	3.63464	7.06913	7.4152	8.77869	7.54529	2.85345	2.17733	2.75837	4.07014	5.24196	5.55441	18.8145	-0.845784	0.841506	3.044	2.59107
cluster1	1.67398	1.81381	0.510697	0.54827	3.21596	3.31994	3.50383	3.57661	2.9151	3.60799	3.65071	4.23	3.68676	0.280843	0.259958	1.0251	1.18728	5.57271	5.53262	1.2058	4.94469	7.84392	8.24085	8.3417	10.0742	3.41338	2.26102	2.83022	4.01834	5.8709	6.08065	19.7717	-0.852856	0.856666	3.74796	2.69621
cluster4	2.49185	2.40365	0.59418	0.609841	3.63118	4.16445	3.81194	4.39744	2.63779	3.14371	4.6901	4.80608	4.11463	0.27665	0.287849	1.19843	1.23968	5.53634	5.51257	1.5466	4.5715	7.2794	7.50753	8.11651	8.48195	3.23449	2.43926	2.78523	4.19	5.87961	6.47292	20.2002	-1.0455	2.29705	2.43331	2.0921
cluster1	2.33386	1.97949	0.50043	0.439704	3.37046	3.6867	3.87548	3.70762	3.31488	3.78183	3.85509	3.92411	3.67132	0.232202	0.223323	0.916578	0.888676	4.73859	4.74189	1.40738	3.82727	7.29776	7.73472	8.9735	9.0968	2.73918	2.24673	2.52429	3.46218	5.66157	5.47084	23.8574	-0.838712	0.826346	3.21515	2.46892
cluster2	2.24202	2.1495	0.47365	0.457957	3.42532	3.7171	3.70893	3.5862	3.23314	3.53472	3.66419	3.49911	3.46271	0.235161	0.230642	0.764229	0.736457	4.70382	4.36084	1.30119	3.7543	6.92658	5.54698	9.24902	6.71879	2.67806	2.20938	2.515	3.56386	5.07004	4.40191	22.8574	-0.951582	-0.215554	4.03314	3.3745
cluster5	2.72433	2.596	0.608395	0.663068	3.92624	4.23981	3.96621	4.14336	3.34478	3.98581	3.69634	3.9074	3.91236	0.274004	0.263726	1.06683	1.1795	5.1562	5.10608	1.41556	5.18532	7.18226	8.75594	8.19192	9.64204	2.90159	2.38386	2.94716	3.84661	5.81115	6.39566	22.9145	-0.829282	0.806133	3.33043	1.89013
cluster2	2.66977	2.25901	0.623303	0.515542	3.98941	4.0306	3.89502	4.08654	3.54379	3.82228	5.84476	6.01224	4.67208	0.270109	0.295926	1.21416	0.981122	5.60642	5.10876	1.66754	5.18266	8.07149	7.9374	9.2573	9.65527	3.2401	2.43086	2.51911	4.43616	6.09016	5.55114	17.9145	-0.829282	0.806133	2.64267	2.72178
cluster4	2.68551	2.57495	0.561553	0.550414	3.63651	3.56219	4.25803	4.24366	3.32703	3.63244	4.43237	4.49383	4.04164	0.274103	0.29113	1.16026	1.06784	5.01676	5.23213	1.70565	4.58098	7.54874	7.48394	8.80983	8.16226	2.9741	2.45672	2.87741	3.97037	6.25749	6.56095	20.8716	-0.309625	2.39528	3.13464	2.40782
cluster2	2.48014	2.3039	0.631867	0.629448	3.65671	3.84023	4.13939	4.10223	2.8925	3.12971	4.04785	3.93474	3.5617	0.318095	0.303919	1.22174	1.21278	5.27667	5.61759	1.59179	4.63228	7.4756	7.75375	10.0351	8.74818	3.1372	2.53905	2.87271	3.9821	7.22227	6.89753	24.7145	-0.862285	0.87688	3.7344	2.42055
cluster1	2.26181	1.70257	0.617514	0.572862	3.59069	3.61379	3.86209	3.90684	3.01368	3.38353	4.58526	4.03334	3.83642	0.318981	0.338042	1.09434	0.979432	5.47385	4.46397	1.56602	3.83793	7.5446	7.37266	8.64704	8.48754	2.8078	2.29584	2.56245	3.49941	5.86092	5.71916	20.8002	-0.434282	3.58996	3.20814	2.1367
cluster1	2.30954	1.89221	0.57995	0.504387	3.77039	4.01248	3.61591	3.9372	3.40959	3.72228	4.80908	4.84532	4.08244	0.256609	0.298181	1.19901	1.11671	6.26673	6.04331	1.69389	5.24218	9.55831	9.18582	12.2769	10.6003	3.46091	2.64073	2.83146	4.47637	6.27296	6.61424	20.0145	-0.812781	0.770759	2.97624	2.45075
cluster1	2.3478	1.98138	0.487367	0.499418	3.98603	3.9499	3.39869	3.94485	3.43355	3.68994	4.84839	4.58412	3.41811	0.303201	0.302559	0.96158	0.935273	5.41766	4.91939	1.65239	4.94268	8.06845	7.9552	9.18248	9.09977	3.29202	2.23562	2.57339	3.7002	5.3075	5.21488	22.9288	-0.751678	2.3211	2.74644	2.23664
cluster1	2.26154	2.03153	0.514427	0.490282	3.04303	3.40498	3.18812	3.39153	2.8181	3.16828	4.54811	4.67277	4.12679	0.249264	0.253971	1.03577	0.954741	5.45341	5.18353	1.37204	4.63299	7.29259	6.76647	8.25573	7.10723	3.5025	2.44989	2.65909	3.4559	5.89575	5.28188	21.0288	-0.622306	0.972381	3.05135	2.37063
cluster4	3.01109	2.48995	0.681828	0.586997	3.70688	4.13905	3.58537	4.10952	3.4796	3.90232	5.19902	4.77539	3.90121	0.319691	0.330858	1.38868	1.30644	7.0075	6.1117	1.7558	5.11039	9.57245	9.41555	10.8618	11.6318	3.33257	3.04439	3.29859	4.42968	6.40164	6.67986	24.9859	-0.817495	0.780866	2.78593	2.72469
cluster2	2.34598	2.21015	0.501372	0.527012	3.26214	3.44734	3.5679	3.5783	3.29288	3.84098	4.40683	4.52383	3.90075	0.243928	0.248128	0.86002	0.950073	5.29718	4.95639	1.59002	4.51005	8.48603	8.12207	8.45036	9.33779	3.02961	2.15236	2.69248	3.59008	5.74694	5.91784	21.8574	-0.838712	0.826346	3.27399	2.85154
cluster1	1.93898	2.07792	0.358165	0.441881	3.59492	3.3278	3.67608	3.71767	3.26996	3.6402	3.83003	3.99054	3.83936	0.238659	0.244423	0.633368	0.748018	4.36184	3.88409	1.38583	3.42342	6.38369	6.39141	8.05369	7.59631	2.30553	1.79203	2.26513	3.29088	5.06718	4.96234	18.8431	-0.916316	-0.214099	3.48627	2.74198
cluster1	2.1875	2.03037	0.521242	0.497782	3.74625	3.93537	3.94618	3.82806	2.71593	2.94823	5.51007	5.57034	4.30457	0.312156	0.335622	0.931397	0.926516	5.61663	4.79562	1.72824	3.8494	7.18563	6.1156	8.41689	6.94762	3.19605	2.28141	2.48283	4.313	5.60501	5.2449	19.1716	-0.655167	1.73144	2.1978	2.43223
cluster4	2.59667	2.32944	0.63498	0.606818	4.31384	4.0261	4.03644	4.24243	3.22201	3.29005	5.00645	4.87487	4.32215	0.339483	0.344311	1.23491	1.23993	6.85276	6.7815	1.72843	5.08791	10.2652	10.2771	12.9867	11.9114	3.39274	2.77648	3.09237	4.63731	7.26396	7.6809	23.9431	-1.44536	0.786809	3.60337	3.38287
cluster1	2.17983	1.94226	0.491035	0.393545	3.30754	3.45057	3.37149	3.74215	3.23782	3.48721	3.90119	3.7942	4.05436	0.265171	0.243049	0.910528	0.788826	5.1689	4.94851	1.36241	4.17075	7.58527	7.07167	9.75282	8.89895	3.01482	2.31582	2.50887	3.58164	5.01679	4.86143	21.8716	-0.836354	0.821293	3.19016	3.15076
cluster2	2.20771	2.27176	0.535146	0.624823	3.38153	4.01597	3.48625	3.79264	3.35865	3.84812	3.95594	4.18364	3.66626	0.290017	0.262412	1.08024	1.34227	5.37729	5.7273	1.48083	5.12627	7.66739	8.53703	9.09639	9.27688	3.27334	2.33719	3.06093	3.75977	6.76948	6.95187	21.9431	-1.10674	0.428788	2.75091	2.35834
cluster4	2.45634	2.4388	0.616741	0.650427	4.76161	4.45068	4.22747	4.02421	3.46711	3.74825	4.81403	4.76392	3.99928	0.272918	0.266763	1.15173	1.20119	5.76779	5.85676	1.49132	5.93596	8.28985	7.88874	9.2046	8.82964	3.98376	2.402	2.73347	4.28636	5.80973	6.0179	23.9859	-0.685813	-0.104512	2.79825	2.58332
cluster1	2.26979	1.94118	0.506828	0.408449	3.81126	3.80731	3.36044	3.86453	3.69588	4.00994	3.95922	4.4143	3.53794	0.275215	0.257987	0.946749	0.845718	5.36992	4.98437	1.55677	4.67012	7.79946	7.89775	9.17318	9.9046	2.77504	2.15186	2.33528	3.97134	5.90143	5.56647	17.8288	-0.88105	-0.124488	3.36041	2.54889
cluster2	2.60073	2.25983	0.552851	0.476901	3.78192	3.95499	3.83557	3.7744	3.50608	3.99172	5.18242	5.05445	4.09703	0.310078	0.333358	1.04517	0.861818	5.38012	4.83161	1.61478	5.09327	7.90721	7.29915	9.93961	9.53209	3.4373	2.47896	2.59851	4.03768	6.0729	5.68878	22.9859	-1.08086	0.645712	2.80605	2.75848
cluster4	2.67521	2.37713	0.60305	0.595254	4.08223	4.02651	3.76135	3.8676	3.06727	3.62077	3.92482	4.07557	4.14568	0.279089	0.273815	1.06801	1.10102	5.21634	4.73906	1.39845	4.38138	7.80982	7.03655	8.81207	8.783	2.84241	2.4899	2.7693	4.54354	5.80974	5.70078	18.786	-0.850498	0.851613	4.24014	2.46256
cluster1	2.45091	2.06275	0.583387	0.479448	3.42498	3.66771	3.61929	3.89956	3.14933	3.45418	4.95161	4.84012	3.63867	0.280042	0.286223	1.23924	0.937318	5.26013	4.55691	1.4667	5.02227	7.72136	6.16719	8.71871	7.21845	3.23462	2.39121	2.59945	3.91854	6.12051	4.89597	21.9573	-1.71389	4.29	2.37125	2.36212
cluster1	2.26392	1.98558	0.494049	0.38825	3.69263	3.7307	3.86002	4.18284	3.5776	3.88661	4.94303	4.97179	4.31452	0.274789	0.281571	0.944724	0.770193	4.99858	4.34414	1.60189	3.84778	8.43072	7.4971	10.3109	9.00887	2.35947	2.18864	2.34763	4.1786	6.0972	5.40446	19.8859	-0.833997	0.81624	3.71154	2.20096
cluster1	2.05313	1.96197	0.393977	0.39755	4.24409	4.47289	3.84354	4.01548	3.41848	3.84617	4.40528	4.50297	3.79066	0.22593	0.226499	0.723518	0.771558	5.04144	5.06451	1.4807	4.72603	6.99477	7.57539	8.93004	9.53195	3.29386	2.18151	2.68616	4.99567	5.60912	6.18267	21.8288	-0.843426	0.836453	3.13323	1.88218
cluster1	2.28757	2.06128	0.546922	0.501293	3.17246	3.14844	3.41571	3.77726	3.03702	3.33787	4.31106	4.56868	3.7792	0.251185	0.257544	1.06727	0.976222	4.92269	4.82731	1.33734	5.3855	8.43954	8.75995	10.0486	9.63398	3.13499	2.20258	2.36863	3.61442	6.02349	5.49763	25.0002	-1.36068	-0.168936	2.61382	2.30489
cluster1	2.08739	2.00735	0.449757	0.454227	3.36266	3.48913	3.72723	3.66751	3.98186	4.24894	3.50815	3.48626	3.39734	0.277009	0.26231	0.872524	0.900564	4.86878	5.1179	1.40529	5.13992	6.93313	7.86464	8.1916	8.92116	3.10991	2.18411	2.48397	3.85967	5.07234	5.26538	20.9002	-0.963322	-0.192933	4.28839	2.76715
cluster2	2.47177	2.311	0.586407	0.562318	3.95799	4.10653	4.05937	4.4361	3.41121	3.97129	4.6694	4.79688	3.81602	0.273909	0.299515	1.08932	1.04221	5.23622	4.93259	1.60712	4.03125	8.45588	7.91553	9.83561	9.39277	2.66808	2.4067	2.72701	4.47557	5.90102	5.50494	27.0002	-0.815138	0.775813	3.6022	2.71888
cluster5	2.79588	2.60797	0.650824	0.575931	3.52694	3.73109	3.5272	3.5423	3.24014	3.32774	4.60965	4.45124	4.09383	0.228893	0.266046	1.2084	1.03412	5.0798	4.51934	1.2918	4.22045	7.90557	6.80202	9.17737	8.32183	3.26279	2.44312	2.74476	3.80427	5.4447	5.31488	8.02876	-0.810423	0.765706	3.11319	2.59506
cluster2	2.33842	2.26339	0.432108	0.511373	3.40159	3.42622	3.51349	3.7197	3.03225	3.72077	4.24385	4.57365	4.00678	0.237574	0.250752	0.892916	1.08726	4.82993	5.29518	1.24833	5.57296	7.18968	7.7647	8.83757	9.29041	3.66417	2.27962	2.76198	3.53433	4.81082	5.66088	26.9288	-0.826925	0.80108	3.24815	3.20941
cluster5	3.09739	2.78107	0.76662	0.820211	3.50507	3.73128	3.67577	3.65847	3.25817	3.36457	4.69937	4.6852	3.91289	0.289048	0.305866	1.43249	1.461	5.99384	5.80309	1.34221	5.85029	9.49445	8.99769	11.7959	10.8838	3.45685	2.60023	3.00166	3.53905	6.84965	6.10371	26.8431	-0.841069	0.8314	3.04917	3.32179
cluster2	2.33078	2.14147	0.550144	0.561152	4.20196	4.44841	4.21022	4.16519	3.38479	3.74007	4.61405	4.70977	4.08497	0.258757	0.276797	1.12972	1.1226	5.60163	5.40494	1.61982	4.37307	8.48259	8.28503	10.6296	10.5667	2.92919	2.39052	2.75591	4.07329	6.2353	6.14737	22.9573	-0.82221	0.790973	3.2584	3.02093
cluster2	2.66234	2.26665	0.538107	0.475108	3.78331	3.95619	3.46025	3.63274	3.6046	3.73954	4.34162	4.22263	3.77554	0.267175	0.281424	1.07303	1.00198	5.35731	5.26061	1.61477	4.28265	8.67205	8.43157	11.9813	10.4284	2.88595	2.61996	2.8606	3.98806	6.10827	6.3222	23.786	-0.850498	0.851613	3.01557	2.17749
cluster4	2.69576	2.56312	0.687087	0.659506	4.19483	4.17088	4.08828	4.40757	3.20886	3.57069	5.01644	5.18082	4.05536	0.290886	0.302668	1.28037	1.24177	5.85493	5.8333	1.57207	5.32842	9.23096	9.42498	11.0855	11.4156	3.63547	2.50166	2.87738	4.75023	6.76442	6.68493	24.0573	-0.805709	0.755599	2.48141	1.93795
cluster2	2.28221	2.21864	0.496991	0.503754	3.59509	3.95891	3.71879	4.12848	3.38077	3.75252	4.35973	4.56392	3.76461	0.254238	0.281397	1.02204	0.993492	5.29038	5.73151	1.49539	5.2696	8.23865	8.32439	9.38827	9.86102	3.49553	2.28191	2.67381	4.05178	5.707	5.62136	23.9859	-0.817495	0.780866	2.76768	2.45749
cluster1	2.27505	2.0137	0.507223	0.445241	3.69756	4.02723	3.88432	4.12645	3.48641	3.57951	5.45493	5.51394	3.97674	0.271328	0.305667	0.999608	0.95581	5.60007	5.34134	1.66113	5.50898	8.2108	8.54837	10.1748	10.7277	3.31788	2.2455	2.52868	4.22967	5.49746	5.00764	22.1145	-0.796279	0.735386	2.64854	2.1074
cluster1	2.37313	2.00938	0.563601	0.510652	3.88755	4.05646	4.33018	4.25053	3.49985	3.99641	4.05673	3.96478	3.9075	0.258547	0.286968	1.17354	1.04555	5.74861	5.1746	1.67728	4.03435	8.35343	7.95724	9.60666	9.12759	2.82113	2.7135	2.90494	4.25182	6.74674	6.3054	25.8002	-0.848141	0.84656	3.58568	2.14703
cluster1	2.21463	1.93083	0.471818	0.40179	3.96242	4.11153	4.32615	4.17079	3.43839	3.82004	4.78915	4.52321	3.98261	0.254477	0.310905	1.04756	0.958334	5.23487	5.37877	1.48976	5.31819	9.31166	8.75455	12.7595	11.7255	3.22527	2.35801	2.77121	4.03624	6.1217	6.40719	23.8859	-0.833997	0.81624	3.03203	2.37382
cluster2	2.40913	2.27958	0.563582	0.534789	4.18198	4.17314	4.18644	3.94099	3.67602	4.03762	4.70897	4.53542	3.58163	0.283977	0.294047	1.16447	1.13653	5.26525	5.28267	1.65783	4.54498	8.14093	8.32732	10.9824	10.2629	3.20492	2.40579	2.76896	4.51626	6.27735	6.20019	24.9573	-0.82221	0.790973	2.65648	2.09473
cluster4	2.72614	2.50494	0.644261	0.593981	3.4962	3.69746	3.57912	3.66221	3.21499	3.46268	4.33712	3.99545	3.91295	0.287874	0.303387	1.32708	1.19987	5.93213	5.29007	1.39158	4.03671	9.60519	7.71585	11.4051	8.53919	2.83529	2.62728	2.84406	4.07324	6.85899	6.1263	19.8716	-0.836354	0.821293	3.05177	2.2987
cluster2	2.24168	2.13827	0.437004	0.448237	3.71115	3.56579	3.85064	4.08587	3.45262	3.70524	4.52119	4.63154	4.18207	0.277839	0.251072	0.760713	0.847013	4.35853	4.66629	1.36535	4.66151	6.18287	7.15647	6.80449	8.03237	2.93251	2.2418	2.68107	4.39267	4.44494	5.43835	11.9288	-0.826925	0.80108	2.99532	2.29735
cluster5	2.95519	2.80023	0.737308	0.675521	3.90931	4.08702	4.03329	4.15174	3.85502	4.35316	5.62416	5.6119	4.18791	0.326657	0.321245	1.44092	1.29729	6.41229	6.05526	1.78568	5.35283	10.3554	9.38882	12.3517	11.2756	3.79414	2.65388	2.91818	4.70508	6.93263	6.33625	22.043	-0.808066	0.760653	2.0742	2.18832
cluster2	2.54101	2.32621	0.564596	0.529153	3.98964	3.89148	4.3259	4.27341	3.0312	3.2977	4.57142	4.60183	3.86433	0.267745	0.274913	1.10931	1.06628	5.407	5.45253	1.40181	4.19084	8.22652	7.99664	10.0116	9.19293	2.92332	2.54423	2.85356	3.87545	6.03701	6.54399	19.043	-0.808066	0.760653	3.01825	3.16002
cluster2	2.28591	2.06255	0.503741	0.558585	3.18418	3.52147	3.18725	3.28365	2.92056	3.55222	4.22018	4.38702	4.19348	0.259078	0.258094	0.865341	1.03087	4.35906	4.71381	1.24762	4.16705	6.20057	6.77594	8.08144	8.9719	2.93195	2.17175	2.57742	3.63348	4.92493	5.25352	18.9431	-0.824567	0.796026	3.81936	2.58676
cluster2	2.43618	2.11212	0.499412	0.430765	4.21245	4.14285	3.88978	4.03549	3.57712	3.93115	4.86261	4.81554	4.0125	0.258963	0.272876	0.930957	0.848001	6.12961	5.27015	1.36557	5.59433	9.11963	7.82498	10.8057	9.77321	3.4438	2.39838	2.67719	4.55581	5.29683	4.80967	23.8574	-0.838712	0.826346	3.26795	2.86771
cluster1	2.36176	1.99765	0.546241	0.466006	3.6322	3.8039	3.56235	3.48917	3.47354	3.53483	4.68461	4.57575	4.05174	0.236102	0.239951	1.12049	0.92442	5.43545	4.68523	1.54489	4.66188	8.18716	7.5374	9.47668	8.84758	3.06865	2.41894	2.54732	3.26155	5.60047	5.41808	23.0145	-0.812781	0.770759	2.68195	2.06309
cluster1	1.86127	1.69952	0.40603	0.389081	3.48468	3.54803	3.19919	3.22357	3.15812	3.28979	4.4585	3.98495	3.74289	0.228089	0.240849	0.695455	0.688738	5.35304	5.04108	1.20683	4.16356	7.28436	7.45006	7.97316	8.673	2.80191	2.10375	2.42028	3.6371	4.60887	4.91726	22.8574	-0.838712	0.826346	3.34794	3.0212
cluster1	1.96817	1.92147	0.31984	0.332608	2.51265	2.9531	3.00495	2.99659	2.69048	3.0293	4.18265	4.46511	4.07292	0.238232	0.195302	0.450433	0.587468	3.4281	3.85	1.01638	3.79828	4.42438	5.65028	5.41807	7.57233	2.65915	1.84158	2.32827	3.44971	2.99348	3.4799	9.05733	-0.805709	0.755599	3.3443	3.34933
cluster2	2.56523	2.20991	0.649298	0.587611	3.87436	3.83858	3.93086	4.01446	3.38072	3.77092	4.7517	4.67475	3.99747	0.258837	0.266059	1.25443	1.08384	5.56896	4.74249	1.51065	5.43701	8.32536	7.45882	9.87634	8.68911	3.4237	2.59462	2.58148	3.48634	5.7867	5.6507	13.043	-0.808066	0.760653	2.80992	2.1857
cluster4	2.72748	2.39895	0.676792	0.637186	4.00184	3.8752	4.15999	4.23672	3.69246	3.93151	4.87211	4.62701	4.06156	0.318611	0.305733	1.36506	1.28692	6.6037	6.20034	1.52913	5.58644	10.6331	10.3051	12.4628	11.25	3.65888	2.6668	2.92455	4.80292	6.80471	7.30177	24.9573	-0.82221	0.790973	3.01872	2.05152
cluster1	2.21414	2.02496	0.365381	0.368395	3.64765	3.53055	3.43718	3.43384	3.0225	3.18633	4.31957	4.34369	4.00525	0.251585	0.232426	0.567116	0.599351	4.84515	4.79446	1.17029	4.27962	7.05434	6.66274	9.63202	9.48021	3.01157	2.16021	2.39354	3.96602	3.90051	4.02956	24.8859	-0.833997	0.81624	3.34501	2.724
cluster2	2.3843	2.12508	0.588297	0.537992	3.14076	3.95427	3.70856	4.15022	3.43186	3.97333	4.31683	4.31651	3.95289	0.287164	0.296401	1.09904	1.09956	5.03804	4.65648	1.58936	4.16202	8.00467	7.85525	10.442	9.26914	2.77596	2.38281	2.79681	3.8517	5.94954	6.47866	24.9145	-0.829282	0.806133	3.65316	2.47306
cluster2	2.45564	2.11372	0.570087	0.456592	4.0438	3.81352	4.43708	4.15114	3.55547	3.88554	4.46534	4.42101	3.92766	0.257894	0.275	1.02319	0.8707	5.29818	4.88898	1.73576	4.68977	8.0069	6.86462	10.1377	8.13321	3.29085	2.52317	2.74511	4.34933	5.98288	5.71953	17.9716	-0.819853	0.78592	3.70894	2.83554
cluster2	2.6912	2.19195	0.68071	0.572285	3.5317	3.69186	3.63514	3.5682	3.53441	3.67949	5.56313	5.20216	4.42818	0.264941	0.292447	1.31763	1.1134	6.10734	4.75207	1.39021	4.47132	8.70983	7.34719	10.074	8.26211	3.28302	2.58583	2.54722	3.89113	6.34876	5.57933	16.143	-0.791564	0.725279	2.68003	2.36311
cluster4	2.76153	2.4505	0.618719	0.521157	3.63265	4.07853	3.59398	3.58012	3.56997	3.91046	4.94592	4.78285	4.25052	0.284704	0.292797	1.22885	1.11169	5.8693	5.59745	1.48935	5.38763	9.48656	8.97699	11.5084	11.4337	3.70526	2.732	3.07907	3.62605	7.20863	6.96926	17.8002	-0.848141	0.84656	2.88001	2.08237
cluster1	2.09301	1.99856	0.472142	0.54986	3.96187	4.23633	3.96197	4.25422	3.76077	4.14964	4.32299	4.45965	3.81863	0.261479	0.256836	0.921908	1.09082	5.58496	5.75683	1.59883	5.24176	8.93388	8.77458	11.417	9.96096	3.41618	2.44481	2.72093	4.59132	5.95751	6.05194	21.9145	-0.829282	0.806133	3.21648	2.29503
cluster4	2.94406	2.46474	0.683765	0.617536	3.74996	3.74681	3.59512	3.75308	3.53581	4.24284	4.17238	4.07427	3.80628	0.315012	0.307758	1.31192	1.2312	5.98486	5.98789	1.5512	5.08877	9.47802	9.75469	11.3168	11.3029	3.6393	2.64821	2.89774	4.35572	7.311	6.7599	18.8002	-0.848141	0.84656	3.68137	2.13358
cluster5	2.77276	2.59572	0.663338	0.670633	3.28684	3.71106	3.76832	4.34567	3.76996	4.35146	5.15507	5.03269	3.97498	0.297341	0.300675	1.32874	1.31864	6.11709	5.54148	1.61948	5.37252	9.41359	9.20792	11.8478	11.7657	3.37829	2.67422	2.93386	4.34999	6.5556	7.1574	23.9431	-0.824567	0.796026	3.68289	4.25487
cluster4	2.43551	2.46824	0.562765	0.580954	3.2682	3.60007	3.53998	3.75601	3.21311	3.57702	4.32744	4.26661	4.3097	0.271534	0.285642	1.20173	1.18243	5.95566	5.31152	1.41985	4.53552	8.23335	8.18455	10.2287	10.3603	2.84852	2.54798	3.02361	4.19433	6.21359	6.04021	27.8145	-0.845784	0.841506	4.04217	2.46287
cluster4	2.36478	2.56378	0.459758	0.6188	3.73688	4.31026	3.98605	4.00914	3.36701	3.9962	4.38796	4.43159	3.84357	0.274941	0.265421	0.945331	1.30205	5.9151	5.41967	1.69634	4.98516	9.12111	8.34225	10.9835	11.0782	3.50577	2.58563	3.17275	3.74934	5.9994	6.70634	22.8145	-0.845784	0.841506	3.37656	2.3832
cluster2	2.46242	2.16685	0.591705	0.602984	3.77711	4.18258	3.63592	4.08983	3.68948	4.0973	5.0414	4.77293	3.90735	0.309616	0.32045	1.17971	1.22942	6.5177	6.03346	1.4482	5.63845	9.75516	9.11276	12.003	11.4269	3.89139	2.60005	2.93609	4.32016	6.98042	7.1707	18.9573	-0.82221	0.790973	2.63844	2.88397
cluster2	2.51118	2.28756	0.637075	0.565759	3.93011	4.03395	4.4992	4.30542	3.19583	3.55873	4.84046	4.82148	3.91694	0.281254	0.293832	1.33768	1.22906	5.91929	5.27706	1.64195	4.82652	8.22373	7.01689	9.43734	7.94885	3.12983	2.62188	2.89444	4.5747	6.25693	5.71247	21.1287	-0.793922	0.730333	2.55468	2.1453
cluster2	2.24839	2.26908	0.502902	0.564819	3.37013	4.00141	3.72813	4.02057	3.17806	3.73985	4.48326	4.57165	3.97712	0.291695	0.3123	1.08156	1.20368	6.85803	6.45655	1.67766	5.48844	9.59459	8.9725	10.4147	10.0519	3.78861	2.59051	2.96646	4.76511	7.09753	6.92641	21.9859	-0.817495	0.780866	3.10254	2.14567
cluster5	2.85998	2.59358	0.681209	0.697294	3.5898	3.75023	3.55776	3.86666	3.92643	4.34	4.24725	4.08282	3.63687	0.28823	0.289408	1.25095	1.27675	5.94889	5.68293	1.39224	4.59255	8.37609	8.46304	10.6375	10.2146	3.64377	2.77066	3.03055	3.42105	6.02803	5.96528	24.0002	-0.815138	0.775813	3.34887	2.77766
cluster2	2.22083	2.08133	0.514808	0.56765	3.77372	3.90319	4.07418	3.91836	3.68557	3.9601	3.65664	3.74715	3.7438	0.285763	0.303946	1.01508	1.09996	5.76711	5.21898	1.49379	4.55475	8.08809	7.64917	10.0032	8.77535	3.02915	2.51888	2.83081	3.79602	6.09725	6.25529	20.8716	-0.836354	0.821293	3.64654	2.58103
cluster4	2.75486	2.36902	0.637121	0.622929	3.67986	3.55172	3.81834	3.90087	3.243	3.48164	4.56097	4.27917	3.67769	0.283778	0.286167	1.21107	1.24133	6.32255	5.6211	1.47603	5.48476	9.43875	8.83112	11.9114	11.8683	3.19446	2.74364	2.89493	4.00332	6.113	6.26025	17.8574	-0.838712	0.826346	3.18804	2.40052
cluster3	3.21692	2.91328	0.638473	0.655554	3.65104	3.54766	3.48285	3.95408	3.24983	3.65664	5.21618	5.25237	4.27284	0.300213	0.288762	1.13779	1.15436	4.7693	5.0542	1.58808	4.86852	7.71456	7.78798	9.7341	9.927	3.00684	2.49042	3.00463	4.48035	5.87798	5.65339	15.9145	-0.829282	0.806133	4.20412	3.1853
cluster1	2.38593	1.82344	0.632788	0.61244	3.3992	3.80648	3.62213	3.84378	3.41795	3.63077	4.52084	4.18114	3.42024	0.251344	0.279142	1.23584	1.19048	6.05273	5.82887	1.66404	4.98696	8.86227	8.74728	9.80469	9.83606	3.44941	2.5432	2.72706	4.25419	5.72748	6.17852	23.8859	-0.833997	0.81624	3.11543	2.07903
cluster5	2.75214	2.58685	0.624691	0.622128	4.22069	4.4138	4.00043	4.12991	3.78903	4.15323	5.33777	5.52939	4.5321	0.318425	0.326469	1.24947	1.27467	5.65043	5.69527	1.74969	5.82859	8.87238	8.74266	11.6651	12.0169	3.68458	2.77495	3.09626	4.46823	6.94474	6.6446	22.8431	-0.841069	0.8314	3.41416	1.99879
cluster4	2.62078	2.42441	0.62931	0.607169	3.40937	3.91555	3.94977	4.09584	3.54043	3.80209	4.29548	4.3004	4.08354	0.265253	0.279253	1.23099	1.20645	5.44667	4.93364	1.42699	4.93932	8.61923	7.90633	10.8279	10.2939	3.19212	2.79371	3.21457	3.75161	6.41817	6.10791	20.7574	-0.855213	0.86172	3.41555	2.78531
cluster2	2.24395	2.12849	0.499237	0.479899	4.56701	4.28889	4.39282	4.41369	3.49938	3.87885	4.07476	4.00633	3.65788	0.278644	0.27431	0.974775	0.986329	5.72349	5.39613	1.52917	4.49022	9.04584	8.67585	10.1368	10.3393	3.13658	2.53122	2.73512	4.75689	6.26619	5.69562	17.8574	-0.838712	0.826346	2.97603	2.41873
cluster1	2.38489	1.83426	0.510002	0.492649	3.2192	3.83426	3.3983	3.66256	3.35732	3.55769	4.41601	4.19376	3.79316	0.256474	0.249311	0.923539	1.06605	5.49247	5.39513	1.37493	4.73956	7.90109	7.95055	9.57328	9.26195	3.32894	2.31571	2.69535	3.86827	5.5203	5.5024	19.9573	-0.82221	0.790973	3.55287	3.5059
cluster1	2.15428	2.00359	0.58912	0.527847	3.87354	3.81427	4.39767	4.31456	3.02295	3.51581	4.32986	4.3543	4.07029	0.260052	0.290887	1.07654	0.963266	5.25245	4.77127	1.46013	4.58451	8.27153	7.63805	9.95769	9.93064	3.00186	2.40603	2.65104	4.15287	5.88858	5.90799	20.9145	-0.829282	0.806133	3.04386	2.17026
cluster2	2.18793	2.07862	0.498483	0.509105	4.04431	4.46265	3.8283	3.92604	3.25133	3.76542	4.23505	4.3054	3.96693	0.270665	0.26019	1.08472	1.03993	5.96825	5.32502	1.44488	4.70855	8.43397	7.90316	9.48034	9.7127	3.24523	2.57161	2.86866	3.83709	5.84041	5.70453	24.9002	-0.83164	0.811186	3.04246	2.13464
cluster4	2.65874	2.47257	0.637661	0.573877	3.52518	3.94764	3.92864	4.41182	3.42465	3.75846	5.76727	5.42602	4.40355	0.249666	0.267897	1.13555	0.963699	5.77937	4.65057	1.5671	4.5338	7.88582	6.684	9.60499	8.08453	2.88306	2.28716	2.57246	4.08972	5.30386	4.91111	25.1716	-0.78685	0.715173	2.68572	1.99713
cluster4	2.85335	2.52964	0.619748	0.641008	4.43234	4.23262	3.91871	4.13958	3.40374	3.68383	4.88148	5.02147	4.3957	0.316572	0.317217	1.12388	1.04083	6.23515	5.97824	1.59508	4.91672	9.16898	9.76238	10.0228	11.8984	3.31383	2.43761	2.69743	3.97459	5.85323	7.14958	24.0002	-0.815138	0.775813	3.17012	2.12633
cluster1	2.08726	1.69925	0.436954	0.373263	3.46057	3.48577	3.55755	3.59836	3.15765	3.62462	3.97115	4.02767	3.81646	0.258033	0.239348	0.807915	0.667527	4.73608	4.36369	1.26378	4.18363	6.57348	5.94187	8.51532	7.9377	2.90429	2.11535	2.24241	3.71795	5.69258	5.32727	22.8288	-0.843426	0.836453	3.17964	2.57334
cluster2	2.15814	2.2233	0.463133	0.52529	3.44907	3.62907	3.21313	3.69784	2.89784	3.71289	4.13506	4.27605	3.96197	0.272927	0.25631	0.94199	1.1078	5.0251	5.28676	1.45651	4.3291	7.28032	8.37611	8.91422	10.3084	2.86319	2.26504	2.83477	3.74379	5.9829	6.28065	19.0002	-0.815138	0.775813	3.4989	2.12504
cluster2	2.34108	2.30112	0.488837	0.554452	3.54347	3.77419	3.79878	3.69832	2.7241	3.17457	4.11094	4.24329	3.95504	0.283606	0.26433	0.85236	1.10428	4.68449	5.11108	1.43268	4.00813	7.27427	7.86488	8.63188	8.72803	2.78141	2.22869	2.74196	3.96056	5.5225	6.06809	24.8716	-0.836354	0.821293	3.37453	3.00958
cluster1	2.21948	2.00413	0.442312	0.387106	3.5689	3.59444	4.00699	3.81405	3.00853	3.47609	3.8813	3.93127	3.76623	0.241369	0.236461	0.811301	0.727205	4.53994	4.4453	1.23454	4.09666	6.43036	6.76468	7.88248	7.39971	2.55033	1.98565	2.35669	3.59063	5.28938	5.3434	16.8716	-0.836354	0.821293	3.51985	2.76494
cluster2	2.32484	2.32562	0.497974	0.557359	3.18602	3.62475	3.87927	4.13233	2.9206	3.34157	3.99309	4.13031	4.10393	0.276694	0.285638	1.03746	1.1701	5.40319	4.8182	1.70936	4.5316	7.70099	7.74527	9.19803	9.65251	2.8039	2.40046	2.83049	3.68957	6.51302	6.50194	22.9573	-0.82221	0.790973	2.88336	2.17621
cluster2	2.17491	2.13131	0.440504	0.473044	3.67768	3.88594	3.68276	3.83515	2.86344	3.25796	4.61401	4.8809	4.25984	0.266165	0.25368	0.860933	1.07182	4.57561	4.46846	1.37298	3.60436	6.13443	6.29547	6.10529	7.38015	2.76139	2.06724	2.55941	4.05135	4.9419	6.36514	5.17159	-0.78685	0.715173	2.65025	2.68231
cluster5	2.92372	2.70716	0.723908	0.68769	3.98249	4.02641	3.67571	3.89108	3.49644	3.93791	5.06028	5.17091	4.32933	0.31717	0.298085	1.37671	1.36085	6.93828	6.18047	1.82855	5.18451	9.76166	8.47343	11.59	11.4698	3.76171	2.82305	3.11509	4.7309	6.33701	6.43947	9.243	-0.775063	0.689906	2.83823	3.2613
cluster1	2.15789	2.02293	0.410846	0.40168	3.42741	3.6403	3.57014	3.80668	3.08183	3.62114	3.23736	3.37135	3.35242	0.226114	0.211009	0.803348	0.766523	5.37074	5.0042	1.09969	4.30989	8.21423	7.66324	9.9205	8.57278	2.87127	2.25152	2.54235	3.2014	5.03992	4.69555	23.9145	-0.829282	0.806133	3.5231	2.44656
cluster2	2.44266	2.09514	0.608483	0.538158	3.92414	3.69461	3.763	4.19398	3.21771	3.80095	4.58719	4.57959	3.98413	0.287911	0.293974	1.13769	1.02714	5.71163	5.02013	1.77288	4.14574	9.34772	8.25368	11.6521	10.0064	2.76156	2.28764	2.49298	4.20641	7.3395	6.69135	21.1287	-0.793922	0.730333	3.14838	2.25837
cluster1	1.92969	1.58421	0.467904	0.336571	3.77549	3.63275	3.79797	3.96786	3.11865	3.49535	4.23142	4.10004	3.76596	0.22798	0.247746	0.915214	0.667549	5.32728	4.6343	1.46898	3.96945	8.14891	6.69671	10.729	8.63781	2.53696	2.13943	2.33708	3.29735	6.22999	5.26293	20.9002	-0.83164	0.811186	3.24108	2.07462
cluster5	2.89274	2.75735	0.758763	0.727964	4.35028	4.51324	3.865	4.01782	3.49817	4.00136	6.3875	6.58065	4.68642	0.320066	0.317624	1.51062	1.45841	6.1574	5.84599	1.76858	4.8227	10.5308	9.52393	12.2959	11.7209	3.23062	2.74937	3.0311	4.80605	7.6754	7.30191	21.2573	-0.772705	0.684852	2.1411	2.44086
cluster4	2.45136	2.39761	0.565576	0.623187	3.42598	3.55363	4.12228	3.9816	2.91335	3.74643	3.55718	3.89509	3.8149	0.266067	0.238731	0.957801	1.19754	4.21103	5.35714	1.34019	4.58495	5.54008	7.72738	7.22866	8.70021	3.12945	2.30305	2.94716	4.00425	5.30648	6.10741	19.9145	-0.829282	0.806133	3.56378	2.98537
cluster1	1.90256	1.99064	0.598442	0.532459	4.11444	3.54987	4.64335	4.36522	3.19202	3.46621	3.95802	4.04133	3.76664	0.285566	0.294831	1.11295	1.01386	5.95244	5.52261	1.54491	4.98127	9.28084	8.35242	11.2943	9.72719	2.80793	2.12183	2.52364	4.7746	6.22791	6.11974	23.9859	-0.817495	0.780866	3.16382	2.21035
cluster4	2.4119	2.41578	0.529446	0.570565	3.64029	3.47255	4.35431	4.3683	3.31132	3.78817	4.47862	4.48061	3.91012	0.323883	0.329489	0.975087	1.13324	4.87031	4.96819	1.50428	3.73198	6.98535	7.45592	9.44481	9.45432	2.44429	2.27225	2.75484	4.7779	5.41929	6.34798	25.9431	-0.824567	0.796026	2.88839	2.41538
cluster5	2.60485	2.62012	0.579821	0.629283	4.0831	3.93683	3.77083	3.83842	3.78714	4.20751	5.21935	5.35835	4.31098	0.290244	0.277944	1.12349	1.2915	5.01836	5.25659	1.5131	5.47123	7.49695	7.63812	10.3332	10.1945	3.11674	2.40248	2.91745	3.89742	5.93606	5.85227	24.9859	-0.817495	0.780866	2.22441	1.88087
cluster5	2.74057	2.60422	0.688481	0.731303	3.80134	4.37454	3.48226	4.25945	3.29641	3.71295	5.13101	5.38425	4.60513	0.353435	0.32974	1.45667	1.51116	7.27364	6.91744	1.59429	5.60338	10.202	10.0455	12.5322	11.831	4.18604	2.96104	3.32451	4.68339	7.60942	7.79243	26.1002	-0.798636	0.740439	2.70398	2.79028
cluster1	2.05625	1.8434	0.432527	0.424289	4.53109	4.29673	4.77544	4.4307	3.3798	3.56	4.5439	4.06715	3.91088	0.277641	0.275491	0.801258	0.758843	6.16604	5.51127	1.58807	5.43018	8.76363	8.18021	9.78071	9.34814	3.35973	2.3109	2.54979	4.09294	5.34589	5.59458	22.9002	-0.83164	0.811186	3.62525	2.79756
cluster4	2.78947	2.40723	0.645114	0.599539	3.52782	3.75224	3.29035	3.75028	3.3913	3.61716	5.4366	5.04421	4.21365	0.291287	0.303109	1.1111	1.03853	5.66752	5.49392	1.52674	4.68567	7.97617	7.2357	9.94115	8.36587	3.2913	2.63714	2.84672	3.43304	5.89239	5.43562	15.786	-0.850498	0.851613	3.18949	2.61774
cluster1	1.77462	1.81322	0.359501	0.393939	3.04424	3.50473	3.42878	3.86396	2.90615	3.54185	4.65045	4.35972	3.74701	0.273089	0.267715	0.755267	0.852487	4.8586	4.60431	1.46505	4.1738	7.53571	7.31378	8.90487	8.08922	2.79914	1.98423	2.39242	4.07625	4.41669	5.06663	17.9431	-0.824567	0.796026	3.20819	2.28142
cluster2	2.41487	2.19446	0.505472	0.469882	3.49169	3.41478	4.11357	3.77742	2.99883	3.49427	4.6125	4.4813	3.89672	0.27984	0.282698	0.997768	0.926203	4.99078	5.05529	1.38643	4.77481	7.83061	7.25164	10.0691	9.71188	3.17387	2.39723	2.74214	3.5189	5.62206	5.6201	23.8716	-0.836354	0.821293	3.04669	2.5779
cluster4	2.27111	2.47316	0.473474	0.564556	4.03863	3.85374	3.93608	3.86895	3.03884	3.32176	3.68749	3.57582	3.51803	0.256498	0.251583	1.00222	1.11968	5.37164	5.1949	1.22339	4.30653	7.53404	7.13624	7.80275	7.70755	2.95492	2.31049	2.78037	3.96488	5.45321	5.69419	20.8431	-0.841069	0.8314	3.06492	2.80629
cluster1	2.20283	1.8934	0.435649	0.349564	3.63838	3.74211	3.42101	3.74721	3.37919	3.52161	4.59678	4.35823	4.0513	0.254472	0.276814	1.01541	0.825819	5.95105	5.06766	1.51435	4.80536	8.27563	7.10053	9.70027	8.5656	3.08264	2.38603	2.497	3.69992	5.45371	5.29144	22.043	-0.808066	0.760653	2.74745	2.64948
cluster5	2.97253	2.73475	0.707323	0.691838	4.24222	4.10473	4.11013	4.07831	3.88937	4.15579	4.86091	4.47108	4.02974	0.319464	0.314837	1.45881	1.40639	6.03836	5.82316	1.74434	5.17568	8.932	7.89281	11.6631	9.08539	3.46835	2.9542	3.32338	4.9128	6.81986	6.64429	23.9573	-0.82221	0.790973	2.9824	2.59627
cluster4	2.56027	2.35895	0.585614	0.57365	4.19267	4.27553	4.38596	4.47489	3.10385	3.59068	5.56031	5.37204	4.29545	0.316926	0.327688	1.18035	1.19985	6.18852	6.02511	1.65292	5.00275	8.76494	8.37395	10.099	9.16678	3.32271	2.36883	2.67674	4.07398	5.28705	5.57692	23.1002	-0.798636	0.740439	2.74375	2.45878
cluster4	2.69793	2.59861	0.582697	0.574911	3.48156	3.67763	3.38548	3.58716	3.55674	3.92005	4.76194	4.34781	3.74853	0.271636	0.260037	0.951779	1.02097	5.40307	5.71953	1.32085	4.7559	7.83328	7.81855	9.0485	9.89057	3.24854	2.50255	2.98582	3.73703	5.00689	5.6496	24.9716	-0.819853	0.78592	4.2369	4.06373
cluster3	3.06108	2.88321	0.710807	0.718106	3.80998	4.1422	4.30026	4.04569	3.27024	3.7206	4.12347	4.33703	4.09527	0.342559	0.351842	1.39624	1.34756	6.81154	6.57636	1.64921	5.64454	10.3864	9.76627	11.7368	9.83145	3.82702	3.09074	3.47176	3.95806	7.01098	6.67525	24.9431	-0.824567	0.796026	3.18276	2.11054
cluster5	2.76853	2.80016	0.681157	0.7548	4.51224	4.46724	4.16064	4.45721	3.49607	3.882	5.22617	5.41227	4.31842	0.336032	0.330065	1.32599	1.45567	7.25487	6.98916	1.90829	5.1907	11.2386	10.7555	13.5496	12.327	3.82251	2.93049	3.51515	4.82336	7.9781	7.76401	23.0288	-0.810423	0.765706	2.63594	2.43774
cluster5	2.79459	2.69847	0.688779	0.661278	4.03024	4.16202	4.0894	4.01437	3.59232	4.18201	5.37654	5.68423	4.00913	0.334983	0.323706	1.3015	1.20614	6.65951	6.20421	1.85936	5.88383	9.31133	8.94046	10.8992	11.6363	4.10865	2.8586	3.19167	4.12316	6.67822	6.31415	20.9431	-0.824567	0.796026	3.16543	2.4528
cluster1	1.88543	1.70112	0.397651	0.367619	3.23097	3.47046	3.58972	3.6377	3.07084	3.21814	4.32627	4.10695	3.75682	0.253374	0.251253	0.865132	0.837078	5.39919	4.47793	1.62594	3.98955	7.36907	6.47748	8.13942	7.57436	3.16674	2.35259	2.60302	3.52101	5.85679	5.49665	2.84308	-0.841069	0.8314	3.17431	2.77674
cluster3	3.27399	2.95641	0.745988	0.697862	4.36224	4.44915	3.99194	4.23293	3.71879	3.85602	6.38974	6.29688	4.61386	0.343383	0.367086	1.40253	1.36107	6.51903	5.88945	1.94066	5.62452	10.5727	9.0653	13.3309	11.782	3.72493	2.97689	3.25745	4.52548	7.31411	7.05668	22.143	-0.791564	0.725279	2.45156	2.11424
cluster5	2.99747	2.67471	0.734029	0.699243	4.11767	4.32529	4.06354	4.23775	3.48187	3.68846	5.95575	5.811	4.07066	0.345855	0.348374	1.43503	1.3243	6.73445	6.09468	2.13298	4.94774	9.70933	8.62563	11.656	9.87118	3.64653	2.98238	3.1039	4.66872	7.25352	6.46015	15.1859	-0.784492	0.710119	2.21038	2.16021
cluster4	2.72597	2.41367	0.628583	0.612162	3.71998	3.87084	3.26511	3.57788	3.56175	3.79894	4.58907	4.21937	3.7188	0.279719	0.298694	1.20514	1.16792	5.89639	5.60565	1.65856	4.97513	9.04274	8.49442	10.8413	8.64903	3.34319	2.62548	2.9301	4.00217	6.86985	6.11805	19.8288	-0.843426	0.836453	3.25609	2.49328
cluster4	2.84219	2.42657	0.613348	0.54639	3.79232	3.77032	3.39501	3.55557	3.25258	3.60168	5.80611	5.75687	4.53669	0.296362	0.318841	1.19209	1.11484	5.95277	5.48991	1.7165	4.62589	8.70312	7.88254	10.1633	9.61175	3.24014	2.53599	3.01287	3.88542	6.71493	6.68696	14.0002	-0.815138	0.775813	2.54221	2.33931
cluster5	3.10324	2.77535	0.684832	0.730919	3.83984	4.03351	3.76315	4.14917	3.6219	4.24514	4.74395	4.5458	4.05924	0.338077	0.31805	1.25555	1.38605	5.08222	5.03016	1.74296	5.1992	7.38339	7.76978	9.58794	8.85368	3.3926	2.70254	3.08623	4.76816	6.32845	6.79038	6.97163	-0.819853	0.78592	4.31162	2.83067
cluster2	2.28264	2.09828	0.459318	0.481723	3.95741	3.5789	3.94463	3.98077	3.55694	4.07732	4.35479	4.03141	4.23504	0.264942	0.267507	0.937235	0.939863	5.3808	5.45103	1.53928	4.59665	7.78289	7.95299	9.89349	9.80329	3.01141	2.507	2.97526	4.32235	5.75743	6.33849	16.8431	-0.841069	0.8314	3.84164	2.84337
cluster5	2.88048	2.61135	0.611833	0.634667	4.02406	4.46342	3.80286	4.26029	3.46579	3.85009	4.42918	4.61477	4.05092	0.305749	0.293019	1.1427	1.23532	4.8385	5.02092	1.41229	5.20098	7.67865	8.25865	9.82733	10.3081	3.34845	2.57635	3.04593	4.02007	6.14803	6.25993	7.87165	-0.836354	0.821293	3.44385	3.20362
cluster1	1.925	1.70906	0.378197	0.384603	3.77496	3.60374	3.43306	3.60366	3.08408	3.32578	4.23466	4.26005	3.63899	0.246792	0.262482	0.835499	0.773467	4.67751	4.25463	1.70135	3.99065	6.91354	6.34928	8.8579	7.95666	2.58193	1.89255	2.17715	3.81669	5.41999	5.34575	19.0716	-0.803351	0.750546	2.53389	2.18739
cluster2	2.37939	2.19784	0.510036	0.50135	3.35047	3.86006	3.67387	3.73438	3.10769	3.55494	3.78643	3.78891	3.74334	0.255624	0.217138	0.908292	0.938581	4.30442	3.91183	1.2776	4.10616	7.04833	6.47716	8.88226	8.70233	2.29281	2.24351	2.55839	3.33429	5.09111	5.37803	14.8574	-0.838712	0.826346	3.66839	2.146
cluster4	2.69431	2.47939	0.593363	0.62627	4.43801	4.01613	3.85303	3.71945	3.41697	3.75922	4.47423	4.17564	3.79711	0.277641	0.29029	1.10755	1.2235	5.44248	5.2285	1.52049	4.97465	7.44434	6.70115	8.42291	7.3223	3.61724	2.50437	2.9437	4.43974	6.04246	5.76185	7.0002	-0.815138	0.775813	3.84339	2.97096
cluster1	2.0343	1.85577	0.440282	0.372275	3.60877	3.92149	3.76028	3.72966	2.9199	3.49862	3.56376	3.61375	3.80557	0.204733	0.225598	0.799698	0.762695	3.54632	3.92398	1.45097	3.76202	5.4428	5.92752	6.92874	7.88258	2.44743	2.0936	2.5924	3.61069	5.5773	5.76352	20.7574	-0.855213	0.86172	4.15121	2.23843
cluster2	2.23539	2.30952	0.536321	0.600195	4.16737	4.70199	4.00345	4.35647	3.53117	3.85561	5.07612	5.08632	4.16567	0.281527	0.296956	1.09749	1.17973	5.64355	5.31252	1.59595	4.75679	8.46097	8.88791	9.78834	11.5533	2.97806	2.34408	2.90344	4.60357	6.40646	6.9595	21.0002	-0.815138	0.775813	2.87064	2.12586
cluster2	2.19649	2.22328	0.551413	0.606192	3.74598	3.98528	3.60954	3.88172	3.00158	3.642	4.79728	4.47264	4.02188	0.310042	0.290369	1.1193	1.20512	6.13939	6.2714	1.39692	4.9593	8.57343	8.76556	9.40007	9.23814	3.40339	2.37381	2.84885	4.3201	6.24433	6.16558	14.0002	-0.815138	0.775813	3.33439	3.03258
cluster4	2.71157	2.5497	0.57255	0.59685	4.09738	4.40279	3.66821	4.05113	3.68003	3.93325	5.08773	5.00086	3.99441	0.302869	0.282853	1.08988	1.20991	5.24613	5.22857	1.5671	5.52656	8.23883	8.17578	9.95149	10.7166	3.37288	2.50399	3.06606	4.16427	6.52035	6.67723	17.9002	-0.83164	0.811186	3.59717	2.65898
cluster4	2.37663	2.38106	0.435156	0.527548	3.36314	3.36918	3.62829	3.78354	3.01148	3.33569	4.44988	4.64128	3.9937	0.279912	0.259778	0.827085	1.06013	5.19299	5.34238	1.35903	6.1906	6.96136	7.52046	8.13135	8.5816	3.80932	2.31358	2.76121	4.00057	5.14647	5.38999	19.9431	-0.824567	0.796026	3.01758	2.60694
cluster5	2.83329	2.66966	0.611432	0.626024	4.16585	4.39962	4.01905	4.21002	3.54684	3.54913	4.5247	4.41908	4.4135	0.302429	0.285123	1.07612	1.19352	4.98639	5.2854	1.60086	4.33599	7.27413	7.48142	9.7378	8.40621	3.04106	2.56689	3.11312	4.11973	6.42671	6.0665	9.9145	-0.829282	0.806133	3.59415	2.35625
cluster1	2.2935	2.03152	0.535274	0.491632	4.43808	4.47692	3.73806	4.29192	3.58169	3.59997	4.96789	4.96425	4.37518	0.320861	0.33517	1.12159	1.12982	5.88623	6.05194	1.85184	4.96122	9.4712	8.96113	11.9468	11.07	3.59484	2.61988	2.78405	4.98033	7.07787	7.03412	24.0573	-0.805709	0.755599	2.7923	1.85925
cluster4	2.68547	2.36957	0.684971	0.662764	4.20944	4.3088	4.38385	4.46929	3.73398	3.95263	5.12519	5.00996	4.34104	0.365947	0.373996	1.30848	1.23274	6.44302	5.76563	1.82837	4.79451	9.66195	9.47214	10.9708	11.4052	3.30444	2.74752	2.91866	4.41459	6.46068	7.27465	21.9002	-0.83164	0.811186	3.58856	3.51083
cluster1	2.21002	1.8891	0.510373	0.45438	3.80039	4.11132	3.57314	3.76156	3.54668	3.98762	4.49478	4.5217	3.56865	0.266906	0.269716	1.04814	0.964173	5.15283	5.13891	1.71265	4.92891	7.46135	7.61198	8.5882	9.07313	3.31099	2.42718	2.56322	4.4381	6.69927	6.53772	21.9573	-0.82221	0.790973	2.57784	2.29316
cluster1	2.17905	2.03071	0.536539	0.502483	3.28204	3.27065	3.38435	3.56296	2.86727	3.2356	3.87244	3.67266	3.42697	0.244665	0.254219	0.947399	0.88084	4.47559	4.71192	1.4339	4.43654	6.55997	7.36476	7.6715	8.24722	2.77366	2.06784	2.46497	3.53632	5.36965	4.77051	24.9288	-0.826925	0.80108	3.35003	2.56784
cluster1	2.05311	1.92911	0.524286	0.537495	3.33049	4.16233	3.90792	4.31184	3.4396	4.05431	4.33219	4.55545	3.95217	0.300248	0.292017	1.06096	1.14654	5.49504	5.64393	1.81894	5.2212	8.66553	9.00224	10.2924	10.1098	3.35111	2.29163	2.66585	4.66055	6.39129	6.65105	17.9431	-0.824567	0.796026	3.2946	2.50012
cluster5	2.97444	2.68166	0.640944	0.651157	3.98525	4.2713	3.33208	4.14347	3.21965	3.67573	5.04473	5.59966	4.3307	0.344551	0.308717	1.15089	1.16211	5.27935	5.65956	1.65475	5.51984	7.5656	7.72514	8.42263	9.35246	3.75856	2.51355	3.01573	4.54781	5.73818	5.86025	25.0716	-0.803351	0.750546	2.58388	2.10076
cluster4	2.8853	2.5555	0.629766	0.602632	3.34188	3.69484	4.28569	4.09948	2.86766	3.50952	5.0125	5.26803	4.52999	0.32621	0.31835	1.07222	1.1464	5.54707	5.59485	1.79319	4.22809	6.86299	7.49814	7.8939	8.98478	3.21024	2.52124	2.91453	3.97574	5.78128	6.16347	18.043	-0.808066	0.760653	3.24475	3.06595
cluster1	1.60166	1.78242	0.352644	0.44522	3.00016	3.28748	3.46366	3.4096	3.02511	3.58607	3.55661	4.04642	3.55849	0.237283	0.212929	0.603335	0.884369	4.40724	4.30785	1.21311	4.29773	6.71548	7.07301	8.08865	8.5424	2.71632	1.75914	2.41792	3.13781	3.85288	4.68095	23.8431	-0.389586	0.100744	3.1016	3.32198
cluster1	2.1529	2.03161	0.417713	0.420665	3.09695	3.14473	3.06341	3.19584	2.59829	2.84982	3.84008	3.872	3.61442	0.248518	0.23731	0.744824	0.812114	4.56405	4.27269	1.05973	3.55797	7.12362	6.67012	8.49396	8.00446	2.33025	1.96465	2.40076	3.14391	4.47147	4.34834	26.0573	-0.354226	0.0249434	3.78235	3.09765
cluster2	2.24869	2.09607	0.519479	0.463579	3.60891	4.01796	3.7847	3.90869	3.64856	3.87529	4.06075	4.43366	3.86502	0.267078	0.246325	1.01304	0.915007	5.48132	5.20001	1.48792	4.95361	7.91547	8.2484	9.56382	10.3465	3.16048	2.42185	2.66396	4.04122	6.03827	6.15423	23.8859	-0.382514	0.0855836	2.90435	2.76291
cluster4	2.72111	2.53797	0.720155	0.716024	3.73802	4.15612	3.68173	4.35814	3.47222	3.93123	5.20852	5.40249	3.82401	0.334499	0.320734	1.45002	1.36888	6.62375	6.28967	1.79919	5.58111	9.82379	9.2639	11.541	10.1781	3.78673	2.66209	2.95234	4.81573	6.61182	7.23504	27.9573	-0.370728	0.0603169	2.90501	1.82694
cluster5	2.7862	2.68533	0.629401	0.660912	3.73223	3.73995	4.03092	3.86159	3.37461	3.60849	4.12047	4.60583	3.95679	0.318358	0.29571	1.31616	1.36446	5.3535	5.408	1.51544	4.27812	7.96177	8.19081	9.51898	8.8961	3.36199	2.52027	2.98955	4.25449	6.24532	6.39107	29.043	-0.356583	0.0299968	3.3218	3.41641
cluster3	3.04835	2.86293	0.826854	0.799549	4.00049	4.43982	3.63283	4.27715	3.59301	3.86131	6.31414	6.63309	4.42116	0.354017	0.352993	1.56022	1.35215	6.25952	6.04633	1.81613	5.62532	9.62951	9.28703	12.1312	11.9822	3.57596	2.66258	2.9227	4.38277	7.6122	6.62002	26.1573	-0.337724	-0.01043	1.67711	2.18434
cluster5	2.82853	2.64261	0.619835	0.622639	3.57535	3.94171	3.72643	3.97744	3.52817	3.50013	4.78634	4.98145	4.04644	0.288235	0.299262	1.2037	1.16097	5.81723	5.80199	1.52629	4.37718	8.82362	9.1031	10.3377	10.3991	2.82085	2.5247	2.78583	3.98474	6.14762	6.03925	29.043	-0.356583	0.0299968	2.79364	2.28384
cluster2	2.43057	2.32769	0.575153	0.596818	3.26984	3.45446	3.40388	3.69292	2.93025	3.19818	4.10068	4.22228	3.87568	0.284083	0.273722	1.12398	1.17786	5.83859	5.5747	1.34764	4.25639	8.35307	8.35138	9.05563	8.78565	2.89117	2.41789	2.8298	3.59949	5.7553	5.98743	24.8574	-0.387229	0.0956903	3.29188	2.7389
cluster3	3.50764	3.23976	0.868969	0.849168	4.19844	4.46042	4.40433	4.59002	4.29323	4.66136	7.02195	7.24038	4.74257	0.364704	0.356443	1.68618	1.62389	7.48589	7.22995	1.94569	5.99503	11.2707	11.2311	13.2468	13.0294	3.7585	3.04385	3.33128	4.56794	7.61665	7.23715	28.1145	-0.344797	0.00473001	1.92517	1.95014
cluster3	3.15031	3.13746	0.726807	0.744908	4.35015	4.44757	4.37541	4.40328	3.73173	4.28493	5.22343	5.58719	4.00249	0.310626	0.331529	1.43089	1.38437	6.75445	6.84673	1.66012	5.26235	10.2009	9.71421	12.6232	12.4966	3.40868	2.78541	3.25914	4.89446	7.10548	7.32673	24.9431	-0.373085	0.0653702	2.83408	2.28884
cluster4	2.70077	2.52222	0.600175	0.529719	4.09901	4.24132	3.80805	3.98035	3.28798	3.67958	4.41794	4.36215	3.99067	0.268276	0.26614	1.13568	0.905491	5.92447	5.4903	1.31408	4.8539	8.11855	7.76589	9.88287	9.47283	3.21681	2.65134	2.73847	4.32537	5.58695	5.55847	26.8288	-0.391944	0.105797	3.346	2.55539
cluster5	2.99059	2.75735	0.700133	0.705919	3.86951	4.0304	3.72537	3.91467	3.56087	3.82148	5.15447	5.44968	4.09401	0.295207	0.305287	1.38255	1.37837	6.31656	5.65283	1.40904	4.99382	8.85643	8.36226	10.8527	9.85469	3.37292	2.78368	3.13786	4.25245	6.29648	6.92518	27.0145	-0.361298	0.0401035	3.08672	2.85251
cluster3	2.89671	2.94432	0.764163	0.772048	4.18446	4.57454	3.67673	4.25365	3.85289	4.28159	5.80795	6.32675	4.5212	0.348279	0.33218	1.45254	1.42086	6.27287	6.23536	1.75419	5.67969	10.103	9.98187	12.0038	12.0753	3.56539	2.42074	2.99725	4.45652	7.63889	7.53056	28.1002	-0.347154	0.00978336	1.89646	1.8993
cluster4	2.55183	2.51179	0.620009	0.603787	3.39729	3.73786	3.39043	3.58786	3.37331	3.86408	4.74472	4.90252	4.00693	0.257754	0.277342	1.27735	1.15977	5.45017	5.45847	1.32904	5.03198	8.26175	7.73104	10.4277	9.86312	2.97368	2.48055	2.78056	3.245	6.16835	5.64317	27.9716	-0.36837	0.0552635	3.19742	2.67752
cluster5	2.83363	2.65635	0.616234	0.641985	3.93509	4.15411	3.65559	3.87919	3.48495	3.88647	5.29151	5.28672	4.13033	0.274759	0.265603	1.25835	1.25179	5.68185	5.45742	1.54889	4.20914	9.11884	8.27998	11.8648	10.3115	3.27266	2.51611	3.01822	4.03186	6.41096	6.48824	26.9145	-0.3778	0.0754769	2.84309	2.39105
cluster3	2.98637	2.87033	0.675058	0.712667	4.37513	4.31534	4.33782	4.51411	3.77898	4.23132	5.75665	6.09971	4.31332	0.33336	0.337595	1.24026	1.31949	6.74775	6.73653	1.82775	5.51904	10.7789	10.051	12.7185	12.2078	3.82716	2.76352	3.04955	4.853	6.60256	6.51374	29.1716	-0.335367	-0.0154834	2.17221	2.78636
cluster4	2.58908	2.51516	0.554134	0.725593	3.85193	3.91273	3.81416	4.03415	3.60718	4.13335	4.90452	5.18514	4.17058	0.27921	0.278477	1.11074	1.41178	6.22261	5.56981	1.36325	5.23263	8.93002	8.24924	10.2767	10.8661	3.26997	2.58024	2.92781	4.38062	6.16633	6.62599	26.9859	-0.366013	0.0502102	3.0432	2.23901
cluster3	3.26304	3.11142	0.846803	0.790114	4.3414	4.498	4.19028	4.35896	3.92924	4.21367	6.88503	7.38229	4.62659	0.352574	0.366987	1.5698	1.53574	6.94272	6.63459	1.69052	5.7136	10.5253	10.306	12.9912	12.6373	3.63181	2.72739	3.01566	4.81876	7.38	7.59426	28.143	-0.340082	-0.0053767	1.78176	1.75578
cluster5	2.91165	2.60843	0.657793	0.599178	3.91497	4.11956	4.0604	4.07943	3.33957	3.84026	4.3897	4.74083	3.90821	0.281164	0.268756	1.23862	1.16407	5.24198	4.92395	1.45928	4.86238	7.87003	7.45021	9.8471	9.98344	2.92523	2.58441	2.78634	4.32198	6.07268	5.91709	27.0288	-0.358941	0.0350501	2.94719	3.32505
cluster4	2.77788	2.58164	0.631261	0.632217	4.23638	3.98933	3.94888	3.90549	3.70756	4.23861	4.72162	5.0058	4.10823	0.289157	0.279747	1.30291	1.24265	6.24989	5.9572	1.49655	5.90038	8.26244	8.43877	11.1782	10.5225	3.71535	2.6589	2.94353	4.44014	6.49687	6.34661	23.9859	-0.904969	-0.958628	2.54429	2.5929
cluster3	2.91678	2.82961	0.74345	0.740217	3.99818	4.23949	3.97691	4.16361	3.64647	4.34121	5.7274	5.99167	4.10566	0.349961	0.338981	1.41357	1.30452	5.7712	5.90334	1.79539	5.28948	9.8484	9.0473	12.4287	11.6395	3.41356	2.66123	2.95201	4.30092	7.00805	6.88138	28.1145	-0.344797	0.00473001	2.25265	3.05802
cluster5	2.80265	2.5851	0.676675	0.664936	4.20978	4.14171	3.72773	4.05567	3.77178	4.10708	5.22283	5.36253	4.037	0.309959	0.28765	1.41579	1.37024	6.1139	5.87347	1.50191	4.72533	8.62038	8.26073	10.8029	10.3902	3.21468	2.67198	2.89701	4.57384	6.97089	6.87201	28.043	-0.356583	0.0299968	3.04849	2.88628
cluster3	3.17688	2.82006	0.826738	0.757541	4.90716	4.84601	4.75463	4.81121	3.78515	4.13549	6.01472	6.42242	4.47711	0.319198	0.342381	1.65078	1.47234	6.92724	6.5004	1.90801	6.43317	10.3485	9.64921	12.7467	11.0761	4.08921	3.0286	3.0912	5.67599	7.24305	7.39604	26.1145	-0.344797	0.00473001	2.01279	2.20932
cluster4	2.68986	2.44983	0.601088	0.582946	3.40086	4.66651	4.06099	4.06354	3.09515	3.80604	4.11095	4.5273	3.63828	0.273413	0.270973	1.25504	1.0929	5.94123	5.34634	1.56256	4.66369	8.19935	7.86645	10.0431	8.95549	2.99855	2.64786	2.76975	4.14631	5.82457	5.9063	28.0573	-0.354226	0.0249434	3.07565	2.13911
cluster5	3.0041	2.78526	0.720788	0.709445	4.12412	4.27066	3.83237	3.9521	3.47548	3.70256	4.92697	5.0895	4.11625	0.318202	0.313202	1.35635	1.39751	6.41734	6.26324	1.55898	5.11582	9.73912	9.97403	11.8845	11.8481	3.45292	2.75287	3.09329	4.25891	6.55258	7.02987	27.0288	-0.358941	0.0350501	2.88822	2.94907
cluster5	2.97812	2.70529	0.719592	0.680159	4.48725	4.37382	4.11757	4.4378	3.32744	3.39983	5.13128	5.46523	4.28551	0.296887	0.308706	1.43206	1.42037	5.94762	5.4178	1.60654	5.11655	9.16149	8.49555	11.5123	11.0924	3.4145	2.61556	2.87733	4.69861	6.81553	6.63033	27.2716	-0.318866	-0.0508569	2.37277	2.59298
cluster5	2.829	2.62232	0.695746	0.686746	4.54326	4.32081	3.65414	4.04835	3.73587	4.00505	5.19414	5.35449	3.97416	0.306612	0.305122	1.34449	1.34698	6.02807	5.92956	1.67363	5.34295	9.31555	8.66195	11.4213	11.1848	3.00328	2.60667	2.8982	4.69269	6.48198	6.20863	27.0288	-0.358941	0.0350501	2.21065	2.44769
cluster3	3.1105	2.97776	0.772573	0.790155	4.56267	4.54495	4.14286	4.37116	3.8867	4.27615	6.48394	6.74186	4.55137	0.33316	0.330832	1.56466	1.46876	6.883	6.94839	1.8106	6.00851	10.4377	10.562	12.8974	12.4091	3.68855	2.88089	3.18405	4.91823	7.61087	7.23058	28.2573	-0.321223	-0.0458035	1.86262	1.81098
cluster5	3.06853	2.74921	0.685845	0.677425	3.52435	4.12135	3.12494	3.57192	3.70997	3.97176	5.37634	5.23558	4.57685	0.312191	0.308234	1.19375	1.23222	5.43787	5.33589	1.71563	4.76859	7.90011	8.18115	9.89021	10.2716	3.34231	2.60368	3.01843	4.03573	5.82493	5.75375	25.8859	-0.382514	0.0855836	3.79193	3.53118
cluster3	3.41544	3.16195	0.812271	0.793383	4.77682	4.3493	4.30621	4.28452	4.22007	4.21468	6.02788	6.08771	4.62293	0.39327	0.391403	1.54228	1.60509	6.79969	7.10919	1.95694	5.527	10.3552	10.2715	12.4712	12.1238	4.02447	2.97466	3.55902	4.98111	7.75414	7.78878	24.2287	-0.325938	-0.0356968	2.21039	2.32289
cluster4	2.59968	2.5379	0.733095	0.696242	3.09816	3.77496	3.35501	3.7132	2.90917	3.40531	4.7597	5.25107	4.38857	0.339837	0.327329	1.38032	1.32999	5.79804	5.39177	1.49001	4.57533	8.85421	8.65441	9.90167	10.1036	3.26444	2.60866	3.08398	3.3789	7.03483	6.62927	25.9431	-0.373085	0.0653702	2.92411	3.29933
cluster5	2.92979	2.78796	0.690455	0.698145	3.8094	4.01119	3.61866	4.0203	3.47278	3.69276	5.81593	5.92878	4.62863	0.33777	0.33069	1.29975	1.32772	6.17251	6.07082	1.72713	5.1768	9.43774	9.28186	12.4139	12.0961	3.8609	2.87347	3.21817	4.30713	7.1143	6.91321	25.9145	-0.3778	0.0754769	3.06199	2.74716
cluster5	3.04378	2.71468	0.735868	0.689114	3.8193	4.09911	3.73376	4.00362	4.00628	4.30857	5.65211	5.76389	4.70786	0.33902	0.34368	1.4563	1.40924	6.00738	5.64092	1.85617	5.47212	9.60363	9.38235	11.7663	11.5227	3.58182	2.76068	3.04119	4.31722	7.35978	7.232	26.0002	-0.363655	0.0451568	2.36004	2.13988
cluster5	2.63913	2.65638	0.538642	0.611738	3.81473	3.93099	3.9494	4.10653	3.67241	3.81473	6.08475	6.40222	4.39507	0.340608	0.320141	1.07358	1.14572	6.35153	6.07853	1.75103	4.87603	8.95113	9.18425	10.4116	10.8194	3.54388	2.44314	2.9894	4.4749	6.18189	6.39581	28.2002	-0.330652	-0.0255901	2.43536	2.32878
cluster5	2.79719	2.59131	0.638768	0.62749	4.20125	4.33585	4.00618	4.14189	3.90609	4.32914	4.76936	5.25746	4.65606	0.325952	0.320193	1.21383	1.27807	6.44259	6.38646	1.61265	5.69563	9.12966	9.81762	11.7746	11.8589	3.82916	2.71391	3.22821	4.45692	7.01495	7.03068	25.786	-0.399016	0.120957	4.27603	2.83988
cluster5	2.85069	2.5771	0.760733	0.756288	4.23197	4.28186	4.10756	4.1916	3.57443	4.03858	5.15159	4.83489	4.02176	0.312305	0.321056	1.4522	1.45051	6.5823	6.13591	1.88795	5.53426	9.33372	9.16616	12.0215	11.4545	3.56584	2.86696	3.24042	4.5593	7.09739	7.11835	23.0002	-0.363655	0.0451568	2.81626	2.29365
cluster3	3.18926	3.0632	0.713085	0.747852	4.41285	4.66638	3.84139	4.51872	3.47861	3.97396	6.37933	6.81746	4.46323	0.339019	0.328847	1.37484	1.3697	7.10504	6.88799	1.88403	5.66412	10.9175	10.4565	12.836	12.1354	3.44341	2.71729	3.08426	4.99604	6.83098	7.12522	26.243	-0.32358	-0.0407502	1.87602	2.1142
cluster2	2.16055	2.27472	0.531887	0.602448	3.87518	3.83039	4.36386	4.197	3.04506	3.12454	5.39184	5.64762	4.38809	0.308253	0.312944	1.08408	1.14025	5.66286	5.57897	1.68086	4.80685	8.81735	8.53606	10.1174	9.67835	2.95449	2.24758	2.83995	4.34674	6.523	6.30077	20.9859	-0.366013	0.0502102	3.06023	2.52952
cluster3	3.2632	3.09641	0.697684	0.705443	4.04946	4.20831	3.59533	3.78457	3.64831	4.00937	5.5574	5.6367	4.49084	0.320599	0.309893	1.46269	1.42062	6.30842	6.43607	1.83179	5.12898	9.18513	8.56914	12.1375	11.4412	3.60144	3.0808	3.41894	4.53611	7.40291	7.30036	22.9431	-0.373085	0.0653702	2.94186	2.66217
cluster4	2.84197	2.52042	0.674166	0.645678	4.42454	4.29511	4.20357	4.08494	3.92865	4.30303	5.24161	5.33546	4.42609	0.315431	0.323381	1.30035	1.21178	6.4481	6.1339	1.65738	5.58313	8.96294	8.82574	11.182	10.3827	3.36573	2.64975	2.90601	4.17665	5.96709	5.73487	25.0288	-0.358941	0.0350501	3.77754	3.10539
cluster5	3.03246	2.73755	0.841783	0.759282	3.72724	4.21276	3.55015	3.90037	4.03145	4.18998	6.06639	6.10328	4.28783	0.394609	0.38981	1.63139	1.48927	7.08785	6.9674	1.85136	5.33948	10.7287	10.6468	12.4843	12.4946	3.58546	2.99649	3.34677	4.22775	7.60276	7.47202	29.0288	-0.358941	0.0350501	2.25516	2.12461
cluster4	2.51603	2.3635	0.601313	0.632906	3.28458	3.50535	3.4972	3.62759	2.80598	3.20129	4.75228	4.99995	3.99336	0.266838	0.273179	1.11989	1.17668	5.63957	5.04816	1.35604	4.10543	8.34645	7.63137	9.69955	9.57579	3.18081	2.5466	3.0708	3.65383	6.01523	6.19436	25.7431	-0.406088	0.136117	3.06296	3.07046
cluster4	2.66745	2.52497	0.632212	0.662251	3.26998	3.48303	3.29849	3.38414	3.08598	3.59037	4.58821	4.54449	3.70129	0.284087	0.278864	1.19059	1.24314	5.15619	4.95238	1.31364	4.31174	7.81008	7.71472	10.6679	9.82248	3.0888	2.54829	2.90036	3.99602	6.21694	6.12624	25.9145	-0.3778	0.0754769	2.81344	3.09877
cluster4	2.67013	2.54526	0.633818	0.629274	4.20448	4.37273	3.99775	4.22482	3.74218	3.96208	5.75832	5.8518	4.23526	0.326189	0.334676	1.3445	1.32447	7.2653	7.03441	1.79651	5.98444	10.305	10.9146	12.5456	12.6094	3.7756	2.78434	3.18639	4.67123	7.39804	7.18957	25.1145	-0.344797	0.00473001	2.04806	2.27701
cluster5	2.82119	2.62486	0.703358	0.684765	3.78843	4.16573	4.33915	4.24363	3.6681	4.2675	5.4502	5.76032	4.3699	0.345107	0.353134	1.28836	1.26493	6.03615	6.00732	1.68185	4.69255	9.31728	8.66042	10.3737	10.2245	3.39635	2.71515	3.11022	4.49262	6.16891	6.14618	26.043	-0.356583	0.0299968	2.87877	2.10348
cluster1	1.85895	1.82802	0.441765	0.438237	4.18209	4.44069	3.1255	3.73898	3.60464	3.96518	4.97593	5.17339	3.9878	0.297086	0.293959	0.806262	0.818583	5.95334	5.19379	1.60122	4.18458	8.66414	8.30651	10.708	10.6043	3.04892	2.28274	2.54521	4.53151	6.04645	6.37243	25.9002	-0.380157	0.0805303	2.89362	2.10061
cluster4	2.83498	2.50103	0.686416	0.635498	3.72827	3.80116	4.01717	3.8743	3.415	3.48948	5.30824	5.28131	4.42421	0.307359	0.300293	1.32078	1.24904	6.04192	5.71906	1.65444	4.81301	8.73232	8.31146	10.4283	10.9519	3.22906	2.92249	3.2115	3.73641	6.54813	5.92281	25.8574	-0.387229	0.0956903	3.3637	3.19791
cluster5	2.72053	2.58391	0.670199	0.668667	3.5901	3.79857	3.83982	3.80979	3.17718	3.62066	4.80997	5.0733	3.9803	0.292144	0.282138	1.35557	1.39345	5.93796	5.69012	1.43756	4.55815	8.85135	8.66545	10.1527	9.83526	3.27858	2.57656	2.84494	3.91216	6.12143	5.88118	26.0145	-0.361298	0.0401035	2.15538	2.82175
cluster3	3.20657	3.15061	0.833486	0.842426	4.29912	3.99411	4.12465	4.13518	3.81931	4.23705	5.69963	6.28608	4.44079	0.367543	0.375403	1.52806	1.50003	7.6636	7.02192	1.93358	5.86088	10.6071	10.1353	12.5669	11.992	3.89451	2.78786	3.15725	4.87834	7.19616	7.21252	29.1573	-0.337724	-0.01043	3.13209	1.87412
cluster5	2.62747	2.63349	0.680664	0.672938	3.85658	3.94097	3.73368	3.66167	3.74616	4.26392	4.82264	4.88399	4.12916	0.329379	0.338165	1.42961	1.46985	6.69445	6.9811	1.80773	5.61298	9.79815	9.77422	12.7347	12.3391	3.95384	2.90394	3.30909	4.48078	7.24404	6.73017	26.0716	-0.351869	0.0198901	2.44314	2.36734
cluster5	2.8016	2.64853	0.788506	0.824467	3.51154	4.02673	3.57759	3.95802	3.8471	4.17527	5.53334	5.66972	3.95967	0.365184	0.365913	1.5528	1.55506	7.02176	6.43291	1.88209	6.37601	11.3603	10.8905	14.0026	14.1432	4.14415	2.88842	3.14658	4.63101	7.91082	7.96838	26.1573	-0.337724	-0.01043	2.05839	1.81605
cluster4	2.83447	2.5905	0.628575	0.577061	3.85535	4.11852	3.70763	3.89205	3.17445	3.65307	4.815	5.06452	4.19157	0.308363	0.335247	1.1226	1.04541	5.88416	5.52159	1.66926	4.74267	9.28289	8.54452	11.7351	11.468	3.53869	2.78335	3.02706	4.14004	6.49054	6.40142	26.9145	-0.3778	0.0754769	2.63095	2.28901
cluster4	2.71088	2.51855	0.681769	0.704828	4.07356	3.95628	4.27614	4.23724	3.73129	4.11751	5.26277	5.33456	3.91862	0.338649	0.351885	1.39449	1.38734	6.55636	5.8793	1.77534	5.03537	9.86285	9.43873	11.7672	11.6529	3.25128	2.74759	3.04813	4.332	6.98613	6.66346	26.0288	-0.358941	0.0350501	2.29374	2.09595
cluster4	2.40715	2.52135	0.528618	0.643874	3.96771	4.25783	4.45565	4.18015	3.53601	4.09135	5.16038	5.55659	4.49258	0.329014	0.309083	1.00024	1.21871	6.07094	5.56636	1.62217	4.49172	8.42143	8.18521	10.3081	10.835	3.28198	2.46629	3.08233	4.19818	5.89905	6.15861	25.9431	-0.373085	0.0653702	3.60782	2.8157
cluster4	2.64277	2.4487	0.651949	0.633042	4.01853	3.79701	3.47841	3.87697	3.57415	3.91453	4.79945	4.99459	4.23237	0.2968	0.309356	1.20375	1.20409	5.73356	5.57009	1.58544	5.37533	8.98301	8.24063	11.2758	10.521	3.16486	2.55005	3.06323	4.20083	6.256	6.03785	25.8002	-0.396659	0.115904	3.56498	2.30328
cluster4	2.46692	2.51417	0.577385	0.607622	3.9305	4.16163	3.73989	3.763	3.24742	4.02856	4.64541	5.11432	4.12194	0.243747	0.248326	1.17497	1.27163	5.4919	5.37383	1.38641	4.43188	8.8865	8.49544	10.2651	10.1187	3.16848	2.33434	2.92203	4.25056	5.60914	5.92622	24.0288	-0.358941	0.0350501	3.23755	2.7674
cluster5	2.79414	2.73837	0.642377	0.700425	3.64093	4.34216	4.59925	4.72271	3.66352	4.1928	4.77585	4.8378	3.8112	0.332613	0.303185	1.33492	1.4379	6.56327	6.04022	1.83056	5.25944	9.75624	9.55043	13.2603	12.8633	3.29008	2.80832	3.42577	5.1716	7.47443	7.54075	22.8574	-0.387229	0.0956903	2.87401	2.81184
cluster2	2.62056	2.14195	0.611809	0.499944	3.90373	4.44441	4.0051	3.98962	4.06286	4.21797	4.90711	4.84715	3.64293	0.292371	0.320113	1.25447	1.02988	6.57556	5.67677	1.62874	5.49298	8.95932	8.20697	10.6189	9.01209	3.80402	2.87572	2.98107	4.09286	6.08487	5.20598	27.1287	-0.342439	-0.000323345	2.98241	2.25192
cluster3	2.98643	2.82138	0.759148	0.773926	3.86794	4.16939	4.28118	4.42549	3.83957	3.81771	4.86229	4.97216	3.80713	0.348694	0.344609	1.49644	1.52533	6.75341	6.4826	1.75214	5.9804	10.5365	10.9597	12.4191	12.4824	4.06906	2.8369	3.2267	4.12831	7.6127	7.49377	26.043	-0.356583	0.0299968	2.83768	2.34956
cluster4	2.62248	2.477	0.645992	0.636188	3.66381	4.08689	3.40806	3.96176	3.39585	3.96758	4.13611	4.10938	3.7668	0.279404	0.295021	1.34168	1.31864	6.07174	6.32412	1.58574	5.41226	8.74149	8.5683	11.4111	10.3554	3.77334	2.86317	3.18893	4.66564	7.08216	6.71156	24.8859	-0.382514	0.0855836	3.82774	2.60968
cluster3	3.00876	2.81824	0.743188	0.758961	3.62039	4.03158	2.98795	3.691	3.37087	3.80696	5.49164	6.07614	4.42092	0.303686	0.286889	1.35864	1.38113	6.51537	6.02276	1.54191	5.15336	9.38488	9.25387	11.8511	11.7832	3.47134	2.60689	2.88761	3.91804	6.85362	7.04458	27.1573	-0.337724	-0.01043	2.17746	2.3597
cluster4	2.65116	2.573	0.655987	0.632718	3.47017	3.91693	3.52563	3.72429	3.41397	3.5126	5.0525	5.17403	4.03983	0.331104	0.318512	1.27637	1.31732	5.7592	5.87667	1.72512	4.68075	9.55412	9.15872	12.9492	11.033	3.58267	2.6092	3.0441	4.53068	6.75195	6.57045	26.1002	-0.347154	0.00978336	2.29458	2.17495
cluster4	2.66114	2.36751	0.63562	0.592751	4.05298	3.82278	3.91268	3.97623	3.39569	3.87831	4.78815	5.2304	4.18856	0.296789	0.313049	1.14658	1.06484	5.85996	5.48807	1.54141	5.61291	8.80037	8.8117	11.7498	10.2267	3.53543	2.54238	2.70894	4.18617	6.22208	6.04709	24.9716	-0.36837	0.0552635	2.86865	2.06228
cluster4	2.59187	2.47194	0.604736	0.600353	3.46735	3.93547	3.57561	4.0646	3.22668	3.87404	4.50394	4.90867	4.30245	0.270628	0.249345	1.1595	1.21081	5.53027	5.00767	1.49739	5.18156	7.41529	7.40311	8.58825	8.87357	3.43304	2.53999	2.83351	3.79687	5.72184	5.91712	26.8716	-0.384872	0.090637	3.45476	2.65407
cluster5	2.86651	2.65602	0.658874	0.660447	4.22314	4.09451	4.18891	4.08757	3.41354	3.81056	4.6527	5.07982	3.95669	0.30212	0.317092	1.27979	1.30317	6.00733	5.70554	1.55759	4.67198	8.76076	8.65206	10.5573	10.7126	3.01023	2.69345	3.11293	3.77736	6.80605	6.84351	24.9002	-0.380157	0.0805303	3.01842	2.88761
cluster4	2.74003	2.57615	0.608218	0.607366	4.58646	4.44312	4.20709	4.30114	3.65562	3.96144	5.1569	5.46151	4.18543	0.297227	0.28409	1.26183	1.29948	6.17397	6.44339	1.6244	6.34268	10.2721	10.5556	12.2862	12.6684	3.7784	2.51623	2.87005	4.40165	6.77592	6.81859	27.2002	-0.330652	-0.0255901	2.2008	2.44963
cluster3	3.13809	2.96128	0.771472	0.796797	3.91618	3.95645	4.0378	4.13544	3.37295	3.94519	5.70829	5.89405	4.31232	0.304368	0.303932	1.41894	1.53355	6.55807	6.3758	1.65965	5.36662	9.74616	9.45038	12.111	12.4822	3.63741	2.78706	3.14533	4.65961	6.77521	6.91475	29.1287	-0.342439	-0.000323345	2.02233	2.25131
cluster4	2.58239	2.39718	0.621638	0.609307	3.09536	3.7036	3.8169	3.96275	3.62122	3.81758	4.78623	4.97032	4.3606	0.301489	0.303041	1.24446	1.22732	5.59189	5.19318	1.6519	4.3237	8.52153	8.30629	10.081	9.8963	2.8747	2.61211	2.90396	3.46177	6.08558	6.30685	26.786	-0.399016	0.120957	3.65641	2.44172
cluster5	2.83617	2.63043	0.690788	0.690839	3.69029	4.24547	4.26418	4.32053	3.67288	3.91578	4.83555	5.3789	3.98548	0.303831	0.2983	1.37325	1.38777	6.24152	5.91804	1.7042	6.04076	9.20041	9.20786	10.8625	10.9029	3.95113	2.62769	2.87144	4.20863	7.04079	6.63077	26.0145	-0.361298	0.0401035	2.39961	2.31973
cluster4	2.66853	2.54675	0.638229	0.628725	4.1982	4.06891	4.18208	4.07729	3.72456	4.01265	4.45382	4.81607	3.75541	0.311203	0.334633	1.27096	1.29993	6.31055	5.89925	1.68742	5.45872	10.0527	9.75427	13.2662	13.0416	3.54291	2.58471	2.92349	4.05942	6.88057	6.68539	28.1002	0.739818	-0.964224	2.55234	2.84811
cluster2	2.3664	2.27842	0.582591	0.602372	3.29246	3.61273	3.46614	4.10049	3.31907	3.68846	4.0486	4.49119	3.56813	0.26797	0.254572	1.20112	1.21809	5.29563	5.58794	1.53835	5.21141	9.30808	9.55384	11.8614	10.688	3.22404	2.48548	2.91352	3.853	6.38243	6.13722	27.9288	-0.375442	0.0704236	2.86398	2.21224
cluster5	2.91566	2.79329	0.735801	0.761796	4.23836	4.18718	3.87358	4.16512	3.31318	3.80936	6.21895	6.54083	4.64651	0.317094	0.316077	1.32759	1.39848	6.35006	6.04085	1.71918	5.10349	10.0501	9.56629	11.8074	11.0216	3.59895	2.57009	3.01604	4.81058	6.86314	7.23083	28.0859	-0.349511	0.0148367	2.11331	2.26114
cluster2	2.21175	2.11813	0.417791	0.452809	4.08903	4.33478	3.84121	3.79086	3.65156	3.94289	4.20851	4.31671	3.79282	0.264606	0.232941	0.753507	0.866795	5.05175	4.92375	1.53734	4.2509	7.32741	7.18771	9.90338	8.85595	3.10352	2.16125	2.49201	4.72623	4.76868	4.92791	25.9145	1.46546	-0.811161	3.0289	2.52295
cluster4	2.65838	2.3785	0.658125	0.635954	3.68097	3.81432	4.31827	4.27723	3.5432	3.92787	4.96967	5.18818	3.97409	0.322765	0.303462	1.34068	1.34104	6.32074	5.87835	1.61984	4.81903	9.36255	8.99542	11.1723	9.52431	2.97161	2.68507	2.84614	4.541	6.30928	6.76642	21.9431	1.26931	-1.07139	2.71856	1.71176
cluster2	2.43107	2.23765	0.546719	0.552812	3.5106	3.17843	3.29285	3.62908	3.18139	3.35046	4.17119	4.34338	3.65339	0.265275	0.259961	1.1442	1.08786	5.44023	4.99535	1.48436	4.24035	8.01809	8.08115	9.73411	9.43166	2.69155	2.31475	2.66666	4.06924	5.6308	5.77393	17.0145	-0.361298	0.0401035	2.82645	2.49025
cluster4	2.72472	2.49061	0.617702	0.5559	3.62809	3.44559	3.47202	3.63758	3.28304	3.65445	5.59812	5.98262	4.34626	0.290109	0.267321	1.20093	1.15201	5.17563	4.88383	1.55148	4.70803	8.59229	7.53027	10.1876	9.22943	3.38414	2.39273	2.72178	3.48919	6.22203	5.88675	24.9431	-0.373085	0.0653702	2.7541	3.08637
cluster2	2.21846	2.11132	0.492534	0.480053	3.55373	3.3054	3.73405	3.86308	2.89779	3.4804	4.73748	5.06179	4.22937	0.25221	0.237202	0.900098	0.908151	5.021	4.78441	1.45722	4.10208	7.43066	6.84519	8.83654	8.68945	2.67854	2.16412	2.46165	3.95818	5.06213	5.20927	24.9716	-0.46978	0.427627	2.98341	2.49909
cluster5	2.78772	2.64871	0.585616	0.562175	3.46594	3.97763	4.07105	4.08367	3.41852	3.74777	5.13228	5.2534	4.19094	0.280175	0.268562	1.17057	1.16307	5.5694	5.69831	1.48897	4.94801	8.12219	8.50772	11.0937	10.0732	3.44589	2.60625	2.85242	4.00217	6.14552	6.01707	25.8288	0.786187	0.365284	3.07781	2.64374
cluster5	2.61364	2.62218	0.605284	0.5926	3.64115	3.96422	3.72347	3.89116	3.54291	3.72594	4.77113	4.96293	3.89998	0.297608	0.298877	1.14543	1.25046	6.19857	6.00016	1.75511	5.5546	9.83708	10.3529	11.2834	11.4863	3.5467	2.4614	2.88837	4.20533	6.34821	6.94775	25.9002	-0.380157	0.0805303	2.84067	2.31121
cluster3	3.1225	2.90565	0.717275	0.707971	4.21384	4.2975	3.97634	4.48912	4.02579	4.61964	5.74715	6.08563	4.56503	0.33328	0.334986	1.4086	1.30526	6.82499	6.53939	2.06485	5.79015	11.1115	10.3523	13.3166	12.6245	3.76528	2.90384	3.19866	5.10318	6.95906	6.52551	25.0573	-0.354226	0.0249434	2.27655	2.14987
cluster4	2.49159	2.47726	0.621573	0.625607	3.51998	3.82878	3.45282	3.7858	2.96245	3.29161	4.4067	4.69219	3.79697	0.284843	0.274497	1.15892	1.21541	5.87294	5.39366	1.41457	4.54238	8.59419	8.3929	9.77846	9.73576	3.24595	2.40838	2.88198	3.84067	6.2655	6.09054	26.9859	-0.366013	0.0502102	2.59334	1.98735
cluster5	2.88801	2.75621	0.68846	0.715563	3.90374	4.20912	3.74527	4.04142	3.47461	4.06825	5.25377	5.64056	4.30958	0.280096	0.285408	1.33396	1.33351	5.71757	5.42613	1.66464	5.65449	9.07659	9.14128	11.4366	11.3875	3.6155	2.35735	2.65141	4.15246	6.48775	6.89732	28.1145	-0.344797	0.00473001	2.5714	2.11877
cluster4	2.74975	2.47669	0.560085	0.59358	3.2528	3.70581	3.75424	3.81194	3.62208	4.04965	4.68284	4.83948	3.80636	0.260367	0.249118	1.02317	1.06464	5.28144	5.38438	1.43568	4.83621	8.57945	8.035	10.4101	9.577	3.26276	2.47685	2.76041	3.6629	5.70361	6.04573	22.9288	2.67906	-0.356741	2.90944	2.40333
cluster4	2.79975	2.55385	0.592972	0.569772	3.54443	4.0582	3.45018	3.78771	3.52664	3.91365	5.30417	5.72662	4.37879	0.289498	0.287789	1.16288	1.17411	5.54443	5.5677	1.29435	4.63996	8.88518	9.06123	9.97624	10.2762	3.1658	2.46578	2.8462	4.14552	6.17341	6.21121	23.8859	-0.953067	-1.15797	3.26474	2.27757
cluster5	2.73712	2.64542	0.623957	0.639404	3.43397	3.84783	3.40405	4.07188	3.59676	4.27896	4.97447	5.36339	4.30623	0.28389	0.279704	1.19482	1.17487	5.54386	5.17443	1.58823	5.16036	9.68953	9.39799	11.1229	10.4826	3.33661	2.48094	2.73094	4.20612	6.19319	5.98158	26.0573	-0.354226	0.0249434	2.6671	2.34873
cluster2	2.41119	2.169	0.517792	0.572304	3.52912	3.96526	3.21142	3.64731	3.5368	3.86673	4.05984	4.04465	3.82339	0.272592	0.281312	0.970476	1.08348	4.88252	5.4295	1.35392	3.92346	7.41563	8.90589	9.39741	9.73405	2.75559	2.32278	2.70652	3.90213	5.57491	5.68149	25.8431	0.155184	0.202707	3.37996	3.57534
cluster4	2.56748	2.38032	0.54006	0.534487	3.31684	3.4168	2.94728	3.22202	2.7687	3.16925	4.79952	5.20019	4.38659	0.226912	0.227948	1.03532	1.09033	4.85679	4.88952	1.25302	4.07407	6.99849	7.21807	7.94582	8.43198	2.98008	2.30154	2.60415	3.33385	5.29229	5.33329	25.0002	-0.363655	0.0451568	2.78351	2.65307
cluster2	2.36557	2.3279	0.530491	0.556236	4.09217	4.16424	4.10692	4.76187	3.35985	3.81781	5.12735	5.27465	4.02594	0.306377	0.323136	1.13899	1.21668	6.0616	5.83961	1.72986	5.46016	9.05764	9.28844	11.4527	11.7674	3.66261	2.33208	2.77755	4.43133	6.04019	6.23924	27.143	-0.340082	-0.0053767	2.28057	2.17673
cluster4	2.61256	2.42129	0.597935	0.618227	3.40855	3.29478	3.59383	3.80276	3.43466	3.79584	4.77231	4.81548	4.02039	0.287083	0.279754	1.24074	1.26382	6.04606	5.88219	1.73226	5.39607	9.36879	8.83834	10.7959	10.3831	3.71355	2.6353	2.92061	4.13882	6.29768	6.46452	24.9573	-0.370728	0.0603169	2.80881	2.57112
cluster3	2.97801	2.90427	0.693036	0.748398	3.79487	4.31445	4.14834	4.40929	3.54371	4.11224	4.8504	5.65019	3.8834	0.339793	0.305842	1.34119	1.39161	6.67211	6.41904	1.50268	6.03302	9.55126	10.0637	10.5609	12.0506	4.10042	2.54005	2.974	4.20107	6.88075	7.09658	29.3287	-0.309436	-0.0710703	2.69115	2.06854
cluster4	2.543	2.55573	0.533953	0.574273	3.77083	4.08483	3.8564	3.91949	3.35872	3.85558	4.93911	5.16966	4.26338	0.307071	0.277637	1.10268	1.28323	5.67315	5.77617	1.37391	5.06071	8.57041	8.79543	10.5116	10.3985	3.20906	2.43265	3.06978	3.42266	5.6558	6.11977	24.8574	-0.387229	0.0956903	3.55847	3.84084
cluster4	2.61469	2.3917	0.624418	0.545816	3.53339	3.65503	3.82942	3.87069	3.31248	3.61448	4.57345	4.51982	4.00556	0.255908	0.278701	1.21757	1.03662	5.59795	4.93718	1.48856	5.2403	8.49173	7.27181	10.6907	8.71243	3.22384	2.57396	2.82569	4.74799	6.34282	5.86274	24.9431	-0.373085	0.0653702	3.8161	3.3686
cluster5	2.89518	2.73885	0.644855	0.678963	4.48666	4.11314	4.03975	3.67884	3.90969	3.94458	4.12011	4.2413	3.85174	0.319234	0.320227	1.15392	1.20963	6.15324	5.75298	1.3898	5.42116	8.83662	8.53039	10.967	10.7158	3.47887	2.70261	3.00529	4.05582	5.77641	5.99227	22.8288	-0.391944	0.105797	3.56627	3.57085
cluster4	2.61256	2.51384	0.602361	0.627899	3.14038	3.84634	3.23319	3.89641	3.98943	4.18286	4.18704	4.61528	3.59815	0.273965	0.26438	1.17275	1.32107	5.36079	6.14135	1.44026	4.66684	8.59101	9.81433	11.4649	11.636	3.26193	2.48197	2.88236	4.94754	6.09244	6.94248	26.043	-0.356583	0.0299968	3.42654	2.57105
cluster4	2.53883	2.43829	0.619942	0.662996	4.04267	4.14068	3.78304	4.16126	3.42991	3.73445	4.95625	4.70788	3.82103	0.311544	0.317471	1.16032	1.30668	6.0244	5.83315	1.59276	4.87874	10.1032	9.05805	11.2012	10.3305	3.43031	2.58244	2.95537	4.56613	6.47325	6.63221	28.9145	-0.3778	0.0754769	3.91226	3.14953
cluster2	2.06619	2.22198	0.413475	0.491689	3.23872	3.36316	3.71539	3.75056	3.08861	3.42085	3.94156	4.39563	3.93696	0.259283	0.235519	0.834059	1.01336	4.84731	5.17607	1.41344	4.96312	7.13688	8.28772	8.56968	9.38189	3.38668	2.09737	2.63816	3.80013	5.13906	5.84486	25.9288	-0.375442	0.0704236	3.35356	2.2003
cluster5	2.84901	2.60412	0.686685	0.675148	4.17296	4.33065	3.89301	4.19667	3.71613	4.15803	5.19361	5.3771	3.98562	0.307898	0.296101	1.42271	1.42378	6.17041	5.98125	1.66542	5.73704	9.94161	9.7617	12.8423	12.9134	3.61341	2.58334	2.92467	4.09328	6.95733	7.16835	29.1002	-0.347154	0.00978336	2.21291	2.04193
cluster5	2.85934	2.67346	0.697703	0.691664	3.78441	4.19043	3.7446	4.33178	3.48746	3.90668	4.64555	5.12371	4.14401	0.312159	0.300297	1.33006	1.33231	6.65108	6.14233	1.64595	4.80446	9.14782	9.07948	10.7807	10.4946	3.0984	2.79923	3.15863	4.59618	6.57593	6.69178	25.9288	-0.375442	0.0704236	3.25179	3.23109
cluster5	2.98722	2.80271	0.736839	0.761069	4.16962	4.87825	3.93644	4.9614	3.59025	3.98911	6.15678	6.36421	4.3195	0.324362	0.331134	1.43605	1.3828	6.72055	6.36649	1.94483	4.9812	9.10881	9.25363	12.1687	11.3295	3.2323	2.61578	2.99148	4.93335	7.03011	7.36364	28.143	-0.340082	-0.0053767	2.17473	1.97655
cluster5	2.50168	2.64111	0.589683	0.642	3.55594	3.97834	3.64381	3.80845	3.15068	4.0158	4.32229	5.00398	4.00031	0.292788	0.286506	1.20298	1.27968	5.49493	5.41267	1.35509	4.18667	8.10926	8.48216	10.6083	9.9883	2.89275	2.55471	3.06068	4.09451	6.27023	6.16677	26.0002	-0.363655	0.0451568	2.90153	2.32585
cluster4	2.46154	2.51644	0.549218	0.654825	3.68959	4.19164	3.22806	3.8591	3.49723	3.92152	5.22883	5.69944	4.37415	0.310466	0.274679	1.14855	1.30422	5.5	5.81631	1.58972	4.95641	8.50156	9.15602	10.6859	11.3043	3.44431	2.43191	2.88203	4.11446	6.42521	6.77882	26.0288	-0.358941	0.0350501	2.41504	2.27368
cluster1	2.44546	2.04855	0.424862	0.418396	3.43938	3.86123	3.59068	3.6549	3.48022	3.76026	4.18303	4.38777	4.00312	0.211812	0.227699	0.694048	0.801723	4.9127	4.9024	1.28456	4.80594	6.69829	7.10763	8.21536	7.96626	3.10497	2.29981	2.49201	3.91731	4.67642	4.90318	22.9002	-0.380157	0.0805303	3.52179	2.71849
cluster1	2.36027	1.90051	0.523119	0.424617	3.6828	3.92986	4.08536	4.15697	3.80119	4.23668	3.72046	4.03474	3.70518	0.25019	0.280247	1.03045	0.839796	5.53527	4.93813	1.48517	5.4064	8.82956	7.97171	11.3117	9.94287	3.26276	2.3133	2.569	4.68888	6.22709	5.04616	27.8574	-0.387229	0.0956903	3.63377	2.85461
cluster3	3.25478	2.9743	0.853085	0.852789	4.87369	5.50471	4.31439	4.7166	3.89585	4.30207	6.57312	6.64141	4.26108	0.40421	0.403344	1.6058	1.54645	6.8504	6.90613	2.01689	5.94829	10.4807	10.0108	12.9942	12.0508	4.11427	3.05943	3.35576	5.42999	7.16682	7.15098	29.143	0.29984	-1.09589	2.0963	1.76483
cluster4	2.38727	2.54031	0.497421	0.597986	3.97443	4.01292	4.26059	4.33966	3.00939	3.65644	4.59928	4.94843	4.0068	0.293494	0.267032	0.992621	1.20728	5.15123	5.39442	1.70936	4.71776	7.47457	7.64744	8.93633	9.12806	3.36239	2.35155	2.87434	4.2608	5.95371	6.50348	23.0288	-0.242738	1.83492	3.3368	2.20348
cluster3	3.26262	3.15987	0.774274	0.821185	4.10237	4.55166	3.72906	4.43653	3.92873	4.63826	4.81313	4.80131	3.94097	0.356605	0.355179	1.48336	1.59812	6.75641	6.54602	1.71549	5.86655	10.3562	10.0979	12.1078	11.6811	4.11477	3.0548	3.56414	4.99944	7.15564	7.9288	28.0288	-0.358941	0.0350501	2.79775	2.53131
cluster1	1.8296	1.66544	0.346551	0.320464	3.28096	3.57395	3.4211	3.26296	2.72755	3.14121	4.21281	3.9736	3.53403	0.230032	0.241034	0.60809	0.588986	4.05459	3.74249	1.23751	3.33854	5.36263	5.40565	7.26009	7.67805	2.47876	1.80215	2.04056	3.46	4.70055	4.49606	24.9145	-0.3778	0.0754769	3.4137	2.23261
cluster2	2.33262	2.21892	0.550351	0.568558	4.43	4.63409	4.65631	4.79788	3.16584	3.62333	5.21836	5.37387	3.94545	0.333861	0.336133	1.17297	1.18459	6.16743	5.85805	1.80608	4.8589	8.09574	8.14913	9.11466	9.77424	3.71191	2.59506	2.89082	5.30656	6.14415	6.56212	24.9859	-1.19877	0.185919	2.94295	2.12364
cluster5	2.76561	2.70254	0.637625	0.706991	4.66426	4.62185	4.56998	4.69776	3.71326	4.50832	5.12616	5.50029	4.01751	0.34067	0.323381	1.14129	1.25261	5.36967	5.60197	1.83661	5.40848	8.07518	8.47989	9.95689	10.436	3.59449	2.50198	3.04255	5.02492	5.79717	6.67133	24.9431	-0.373085	0.0653702	2.82694	1.89839
cluster2	2.35656	2.21162	0.641242	0.618014	3.12801	3.25113	3.9028	3.83884	3.0976	3.69303	3.86176	3.94071	3.58417	0.289786	0.284488	1.19911	1.15799	5.41473	5.30168	1.58043	5.00112	8.32186	8.39916	9.76539	9.29695	3.08626	2.41718	2.82852	3.77057	5.79253	5.86647	25.0573	1.57038	-0.0790606	3.16684	2.07073
cluster3	3.1269	3.02471	0.732429	0.748095	3.88454	4.07261	3.84403	3.98302	3.31347	3.74844	5.1311	5.43424	4.10454	0.324682	0.318347	1.26816	1.34994	6.01956	5.63672	1.56585	5.24264	8.83646	8.32275	10.3736	9.70882	3.72375	2.6105	3.21978	4.40339	6.63928	6.74595	27.8716	-0.384872	0.090637	2.32489	1.80225
cluster5	2.86844	2.64592	0.748387	0.696125	3.94363	4.40418	3.63125	4.47043	3.83414	4.33002	4.71554	4.81706	3.55267	0.333102	0.338446	1.38517	1.22381	6.16896	5.99179	1.7485	5.13086	9.19626	8.72358	12.2332	10.7335	3.60232	2.65693	2.92735	4.29579	6.09446	6.37999	24.9859	-0.366013	0.0502102	3.23596	2.48689
cluster2	2.53995	2.28359	0.542946	0.488652	3.33517	3.50538	3.8754	4.01119	3.00227	3.19978	5.01016	4.8743	3.78924	0.25857	0.26084	0.986328	0.926127	5.01161	4.79048	1.3651	5.05579	7.60722	6.99249	9.28937	8.91687	3.11407	2.22295	2.52404	4.31334	5.61059	5.03559	22.9573	-0.769292	1.118	3.05342	2.8056
cluster5	3.02302	2.72034	0.796306	0.746392	3.661	3.74226	3.56563	3.66345	3.15276	3.89709	5.07034	4.94675	3.92063	0.326031	0.32467	1.41274	1.46287	6.63199	6.38768	1.58956	5.06312	8.48847	9.30612	10.531	11.6336	3.75178	2.82578	3.45534	4.1035	6.30644	6.75078	26.8859	-0.382514	0.0855836	2.27452	2.79064
cluster4	2.51753	2.52516	0.622359	0.644963	4.45993	4.39285	3.47427	4.04889	4.2084	4.74954	5.71853	5.88598	4.40396	0.340722	0.33801	1.19899	1.2812	7.11667	6.62349	1.73452	6.17679	10.2769	9.62702	12.7204	12.366	4.27822	2.86411	3.28706	5.1054	6.99884	6.62713	26.0145	-0.361298	0.0401035	2.56223	3.08825
cluster2	2.44438	2.32293	0.547452	0.568933	3.76405	3.87161	3.7706	3.99463	3.55448	3.60203	5.35092	5.51953	4.25688	0.312815	0.298867	1.08659	1.11001	5.83732	5.93876	1.65991	5.09888	8.28502	7.90978	9.79168	10.1674	3.63933	2.52095	2.84172	4.16555	6.0704	5.9778	24.9859	-0.366013	0.0502102	2.60518	2.1208
cluster2	2.37818	2.32534	0.559874	0.590631	3.7139	3.93889	3.58187	3.49214	3.34782	3.82468	5.27191	5.41256	4.25075	0.311046	0.296061	1.00534	1.18911	5.23229	5.54791	1.5169	4.66199	8.05901	8.4664	10.1365	9.77012	3.23475	2.40958	2.88812	3.61309	5.86472	6.26026	26.1145	-0.344797	0.00473001	2.83337	2.66006
cluster2	2.17928	2.17888	0.450641	0.46956	3.34193	3.3204	3.70201	3.67178	3.16713	3.47527	3.92644	4.12712	3.82415	0.25457	0.239251	0.847238	0.845712	4.80191	5.09391	1.32293	5.1334	7.25709	7.09404	9.51324	9.06573	3.54767	2.04628	2.55076	4.17166	4.63847	5.08915	24.8716	-0.384872	0.090637	3.45466	2.70659
cluster4	2.85611	2.44763	0.633884	0.609726	4.00714	4.15381	3.98363	4.33626	3.88351	4.32813	5.80493	5.70377	4.39738	0.348194	0.338427	1.22013	1.2737	6.03817	5.93759	1.83233	4.6434	8.86372	8.81995	11.3339	10.2503	3.48665	2.77302	3.09649	4.72235	6.45706	6.76994	24.9288	-0.375442	0.0704236	3.06915	2.20291
cluster5	2.8836	2.74932	0.694935	0.694734	3.84365	3.92444	3.84829	4.07614	3.45475	3.80899	4.40381	4.54752	4.00018	0.287008	0.283319	1.34501	1.36689	6.19139	5.9188	1.47669	4.8582	9.20991	9.13522	10.742	10.2481	3.66775	2.58481	3.00342	4.18204	6.13077	6.31942	14.9002	-0.380157	0.0805303	2.58005	2.38132
cluster3	3.02251	2.91349	0.737471	0.795283	3.93123	3.70335	3.81013	4.04401	3.45913	3.66105	4.75637	4.70602	3.87587	0.294473	0.290745	1.35184	1.44667	6.3522	6.15089	1.49357	4.92794	8.97173	9.21858	10.7922	10.3115	3.73637	2.60585	3.01159	4.33599	6.22619	6.83184	28.0145	-0.361298	0.0401035	2.40154	2.274
cluster3	3.03871	2.90137	0.74574	0.746344	4.05313	4.11405	3.89323	4.19938	3.59103	3.93971	4.96971	5.189	4.20842	0.310336	0.306523	1.44483	1.46106	6.53015	6.28877	1.59418	5.16796	9.81864	9.72049	11.5984	11.079	3.88219	2.65056	3.02894	4.50685	6.448	6.5531	26.2573	-0.321223	-0.0458035	2.17362	2.26803
cluster5	2.95185	2.81622	0.71729	0.717443	3.93582	4.00787	3.86806	4.13037	3.51471	3.86651	4.6528	4.82977	4.09181	0.297272	0.293529	1.38893	1.40832	6.34045	6.08159	1.52839	4.99449	9.47775	9.39274	11.1188	10.6137	3.7621	2.61374	3.01465	4.32495	6.27035	6.42224	28.0573	-0.354226	0.0249434	2.40122	2.33147
cluster5	2.67105	2.73933	0.69257	0.705472	4.25606	4.22675	3.86038	4.34058	3.59215	4.0033	4.6644	4.75279	4.11755	0.274855	0.274008	1.40415	1.39702	6.2998	6.03719	1.91826	5.03179	9.4687	9.43142	11.1919	11.1092	3.51453	2.55413	2.88162	4.28598	6.39198	6.5553	27.0145	-0.361298	0.0401035	2.49845	1.6356
cluster3	3.00768	2.87096	0.735579	0.736022	4.01123	4.07613	3.88424	4.17473	3.56377	3.91356	4.85653	5.0607	4.16677	0.30567	0.301883	1.42487	1.44222	6.4624	6.21478	1.57068	5.10601	9.69689	9.60344	11.4271	10.9128	3.8393	2.63741	3.02384	4.44189	6.38455	6.50637	26.1859	-0.33301	-0.0205368	2.25491	2.29069
cluster5	2.89986	2.73095	0.672379	0.695225	3.94503	3.98275	3.91125	4.09381	3.61033	3.82433	4.73596	5.00322	4.09125	0.332425	0.307736	1.35699	1.3183	6.06835	5.89493	1.56229	4.862	9.28296	9.20545	10.8447	10.3478	3.77301	2.71869	3.04534	4.28971	6.16884	6.51446	25.9431	-0.373085	0.0653702	2.41618	2.6423
cluster5	2.84637	2.71283	0.682742	0.682348	3.79338	3.87894	3.8375	4.04657	3.42204	3.77762	4.26799	4.39356	3.9502	0.281409	0.27775	1.32105	1.34429	6.11009	5.83	1.4485	4.78385	9.06382	8.99475	10.5364	10.0487	3.61628	2.56903	2.9973	4.10408	6.05463	6.26334	21.8145	-0.394301	0.11085	2.6776	2.40851
cluster3	2.9604	2.93432	0.737945	0.73607	3.76529	4.14965	3.9612	4.23847	3.65541	3.94922	4.46102	4.46753	3.3805	0.323241	0.327579	1.51305	1.46088	7.04158	6.78517	1.62268	6.11294	10.2928	11.1715	12.4941	13.7876	3.92972	2.84071	3.18498	4.483	7.54374	7.91898	27.0716	-0.351869	0.0198901	2.74814	2.72664
cluster5	2.93944	2.80406	0.713225	0.713314	3.91906	3.9927	3.86447	4.12051	3.50381	3.85605	4.60753	4.77845	4.07515	0.295406	0.291673	1.38094	1.40079	6.31335	6.05199	1.51899	4.96971	9.42905	9.34592	11.0503	10.5472	3.74495	2.60848	3.01261	4.29897	6.24497	6.40355	25.0288	-0.358941	0.0350501	2.43374	2.34053
cluster2	2.44297	2.29787	0.527222	0.535774	4.08405	3.95715	3.84272	4.25261	3.21669	3.41484	4.28033	4.70339	4.07515	0.260849	0.279255	1.08688	0.988011	5.18736	5.05479	1.51899	4.8506	7.78169	7.92453	9.2295	8.76227	3.02437	2.27623	2.52947	3.72342	5.06873	4.82502	28.0288	-0.358941	0.0350501	3.19201	2.24759
cluster3	3.1654	3.01585	0.834068	0.832765	4.00516	4.25839	3.87467	4.20343	3.60926	4.12669	5.39316	5.6346	4.22097	0.327612	0.331892	1.62973	1.57677	7.61267	7.60283	1.55375	5.77027	10.8148	11.1737	12.4703	12.3582	4.14717	3.04877	3.38404	3.97403	6.88808	6.59049	27.3144	-0.311793	-0.0660169	1.89868	2.4208
cluster5	2.8836	2.74932	0.694935	0.694734	3.84365	3.92444	3.84829	4.07614	3.45475	3.80899	4.40381	4.54752	4.00018	0.287008	0.283319	1.34501	1.36689	6.19139	5.9188	1.47669	4.8582	9.20991	9.13522	10.742	10.2481	3.66775	2.58481	3.00342	4.18204	6.13077	6.31942	19.9002	-0.380157	0.0805303	2.58005	2.38132
cluster5	2.74233	2.71262	0.641431	0.601841	3.91528	3.93461	3.74955	3.88317	3.09766	3.53756	4.61395	4.87992	4.25414	0.269628	0.26577	1.18164	1.13924	5.71825	5.82224	1.29098	4.57946	8.41639	8.0853	9.3714	8.34291	3.61937	2.3822	2.84692	4.04157	5.88958	5.57963	27.0573	-0.354226	0.0249434	3.3982	2.40254
cluster5	2.92083	2.78581	0.707129	0.707121	3.89393	3.96995	3.85907	4.10572	3.48746	3.84036	4.53962	4.70148	4.05016	0.292607	0.288888	1.36896	1.38949	6.27269	6.00759	1.50489	4.93254	9.35601	9.27568	10.9475	10.4475	3.71921	2.60059	3.00955	4.25999	6.2069	6.3755	25.9859	-0.366013	0.0502102	2.48251	2.35413
cluster3	3.0325	2.89529	0.743708	0.74428	4.04475	4.10647	3.89143	4.19445	3.58558	3.93448	4.94708	5.16334	4.20009	0.309403	0.305595	1.44084	1.45729	6.5166	6.27397	1.58948	5.15557	9.79429	9.69708	11.5641	11.0458	3.87361	2.64793	3.02792	4.49386	6.43531	6.54375	29.243	-0.32358	-0.0407502	2.18988	2.27256
cluster1	2.19729	1.99399	0.500797	0.50288	3.31848	3.36302	3.92908	3.77881	2.8899	3.47016	3.68782	3.69051	3.51328	0.273252	0.253454	1.0518	1.0601	5.22305	4.96143	1.3459	4.8582	7.50515	7.5526	8.90124	8.35027	3.24986	2.26531	2.61379	3.24369	5.48088	5.15312	25.9002	-0.380157	0.0805303	3.48665	2.80708
cluster3	3.09569	2.98056	0.794525	0.827364	4.2881	4.53362	3.89012	4.61153	3.69492	4.05428	4.9018	5.71043	4.57835	0.344988	0.314597	1.49258	1.53195	7.03283	6.75095	1.84942	5.26742	10.5152	10.1997	11.5665	11.0349	3.86526	2.73045	3.03193	4.75393	7.01184	6.52118	24.2144	-0.328295	-0.0306435	1.78798	1.68264
cluster4	2.64991	2.47233	0.659853	0.615968	3.9058	3.6986	4.2301	4.22298	2.99252	3.57324	4.36346	4.467	4.1012	0.304541	0.277561	1.41092	1.34144	6.38745	5.69034	1.35368	4.35889	8.5369	7.86228	9.07093	9.08682	3.18803	2.6936	3.03741	4.21991	6.55654	6.5809	28.8288	-0.373132	0.28031	3.84923	3.12183
cluster4	2.73876	2.4567	0.694913	0.610069	4.8581	4.99094	4.40947	4.7166	3.93333	4.0998	5.54188	5.26431	3.93997	0.299316	0.320629	1.39043	1.21649	6.10639	5.55103	1.77799	4.48409	9.38865	8.21909	11.1286	10.0263	3.02562	2.55014	2.86039	4.3898	6.80133	5.98187	23.0145	-0.361298	0.0401035	2.13104	2.0736
cluster4	2.52242	2.41458	0.64562	0.637449	3.72382	3.61902	3.90533	4.2441	3.59606	3.84136	4.44981	4.26442	3.48775	0.323586	0.315719	1.37892	1.31645	6.19426	5.53736	1.58334	5.52408	9.27503	8.32824	10.2042	9.72704	3.4804	2.56298	2.83046	4.37319	6.60122	6.30662	24.9288	-0.375442	0.0704236	2.6974	2.08329
cluster5	2.86164	2.59424	0.690723	0.675777	3.56861	3.787	3.66571	3.89995	3.51597	3.91122	5.12899	5.1825	4.10014	0.326245	0.330904	1.34038	1.20798	5.30899	4.91308	1.63304	5.3856	7.94159	7.80914	10.2023	10.0772	3.47971	2.62457	2.88182	3.78411	6.14576	5.5059	27.0145	-0.0603097	0.0401035	3.31524	3.2245
cluster4	2.52829	2.35168	0.562998	0.551852	3.46441	3.71916	3.97583	4.059	3.33088	3.61006	4.69457	4.6679	3.96496	0.318086	0.314453	1.15048	1.10251	6.18572	5.45915	1.684	5.21425	9.18452	8.00343	10.6156	10.129	3.53196	2.45523	2.7032	3.88964	6.47686	6.02261	27.8145	-0.394301	0.11085	3.17478	2.56802
cluster5	2.84228	2.66819	0.601077	0.618059	3.90507	4.04576	3.65776	3.97462	3.39353	3.96132	4.76605	4.84003	3.99059	0.26428	0.270333	1.20374	1.17056	5.6167	5.12316	1.58169	5.21357	8.03617	7.95918	10.4868	10.1945	3.32626	2.45063	2.68974	4.24039	6.34049	6.13737	25.8716	0.141858	0.110427	2.55388	2.29619
cluster5	2.84168	2.61523	0.665547	0.620622	3.63619	4.01916	3.83673	4.42063	3.34444	3.6338	4.89002	4.79973	3.99996	0.286546	0.29944	1.34378	1.24788	5.89117	5.20953	1.71006	5.56456	8.49078	7.9861	10.1618	9.89058	3.66959	2.64593	2.88821	4.6778	6.20285	6.01671	23.9288	-0.920984	0.415851	3.1679	2.05669
cluster4	2.67829	2.49985	0.668721	0.681201	3.54122	3.94974	3.48181	3.95558	3.3432	3.8387	5.20963	5.12283	3.8963	0.295865	0.314618	1.34398	1.32746	5.9511	5.89359	1.63428	5.9643	9.4582	8.42905	11.9694	11.1347	3.86379	2.62869	2.92443	3.89255	6.78913	6.59436	25.9431	0.623939	-0.450971	2.60573	2.39235
cluster4	2.51743	2.38354	0.611995	0.647271	3.17364	3.87101	3.36614	3.76805	3.56894	4.06356	3.98381	3.90403	3.74826	0.26549	0.282988	1.17728	1.13704	5.37157	4.97774	1.46006	4.54854	9.28479	8.14221	10.9585	9.42738	3.04276	2.4602	2.76725	3.48532	5.69327	5.60243	24.9002	-1.11382	0.0949231	3.91461	2.34436
cluster5	2.81431	2.65632	0.685151	0.649623	4.08022	3.66916	3.94991	4.09057	3.50748	3.53062	4.3939	4.31393	3.82264	0.263836	0.28184	1.27853	1.17716	6.0371	5.42795	1.47321	5.23944	9.36968	8.69744	11.1742	10.7578	3.52921	2.59695	2.85041	4.38786	5.88041	6.05935	26.9002	-0.83164	-0.106576	3.77284	2.02763
cluster4	2.76826	2.48633	0.716034	0.658562	3.9439	3.89431	3.67821	3.84219	3.61722	3.95081	5.2379	5.20289	4.07304	0.301843	0.331928	1.56995	1.38116	6.3817	6.21951	1.49993	5.62155	9.22572	9.00041	11.2184	10.5639	3.78981	2.89758	3.10356	4.59167	6.67223	6.59882	27.043	-0.375395	0.0353941	2.50224	2.11016
cluster3	3.30341	2.96768	0.762636	0.767368	4.11884	3.96932	3.93163	4.06947	3.99354	4.35608	4.89895	5.08234	3.90903	0.34275	0.355824	1.57051	1.53306	6.79547	6.456	1.94764	5.62555	9.75505	9.79251	11.6166	11.3192	3.94184	2.99423	3.37758	4.49887	7.49124	7.38713	25.9859	-0.366013	0.0502102	2.76388	2.73389
cluster5	2.95604	2.60271	0.605378	0.592775	3.36658	4.09602	3.13311	3.83461	3.23804	3.79069	4.44056	4.33028	4.0127	0.27129	0.279685	1.07887	1.12544	5.41446	5.10961	1.52395	4.64224	7.69013	7.67152	10.2421	9.51048	3.10679	2.60396	2.94754	4.1257	5.2904	5.12533	22.8716	-0.384872	0.090637	4.18434	3.28404
cluster2	2.74215	2.33086	0.612145	0.544362	3.79624	3.72972	3.72046	3.8289	3.36586	3.75239	4.60075	4.30842	3.99558	0.277875	0.287424	1.18378	1.04219	5.32032	5.1739	1.76621	4.44359	7.98994	8.62839	10.3313	9.93912	2.95898	2.55538	2.88884	3.8714	6.35656	6.14238	24.8145	-0.394301	0.11085	3.05662	2.53153
cluster4	2.90142	2.52257	0.684072	0.615163	3.76876	3.96557	3.21173	3.74321	3.71646	4.04966	5.62268	5.56705	4.59116	0.310334	0.322395	1.23728	1.12268	6.04225	5.42826	1.7665	4.79204	8.71597	7.73908	10.224	9.51998	3.28101	2.52016	2.69506	4.19912	5.92615	5.78723	23.9716	-1.23371	0.195593	2.21831	2.16054
cluster2	2.47072	2.3175	0.635288	0.581028	4.04349	3.73512	4.29035	4.2228	3.51897	3.76083	3.94586	4.03543	3.7616	0.270309	0.270676	1.32534	1.26202	5.6778	5.26489	1.53826	4.89274	8.01733	8.04164	10.3778	9.71562	3.0703	2.73098	3.00641	4.33773	7.09481	6.65422	24.7717	-1.37959	0.0972249	4.00798	2.4522
cluster4	2.20782	2.36459	0.508344	0.600099	2.70396	3.26153	3.85387	3.67644	3.06152	3.6016	4.12202	4.40072	3.95652	0.250933	0.246126	1.08539	1.13281	5.4452	5.25203	1.36386	4.74408	7.67558	7.91945	9.33837	10.1134	3.24755	2.38662	2.94104	4.22043	5.341	5.68701	27.9431	-1.08793	1.41649	2.67247	2.47638
cluster3	3.24999	3.02847	0.790399	0.811968	4.17178	4.60932	3.87467	4.16118	3.47599	3.84936	5.44952	5.44242	4.37912	0.321328	0.332427	1.43613	1.4479	6.58846	6.47084	1.68159	4.56365	9.73177	9.08878	12.3017	11.9658	3.50617	2.84271	3.38814	4.13938	5.70937	6.51732	28.9716	1.30588	-0.35673	2.27756	2.22154
cluster3	3.06735	2.84993	0.719845	0.713694	4.30075	4.5495	3.61366	4.0815	3.9442	4.21897	6.08743	6.11841	4.43017	0.331932	0.336786	1.35584	1.32116	7.0186	6.81455	1.6416	5.68815	10.6459	10.7051	13.9795	12.8367	3.56921	2.76347	3.13232	4.66744	6.796	7.53492	29.1287	-0.662239	-0.151448	2.13231	1.84729
cluster5	2.86142	2.68132	0.792158	0.800799	4.12728	4.23632	3.95844	4.07039	3.35018	3.82757	5.68659	5.73459	4.2745	0.3591	0.345237	1.57144	1.5095	6.69576	6.61045	1.61058	5.72126	9.96692	9.60939	12.2373	12.5705	3.47741	2.77798	3.18257	4.40439	6.8007	7.08433	28.043	-0.582325	-0.146315	2.18336	2.13764
cluster4	2.70436	2.45458	0.663918	0.676358	3.91607	3.87887	4.02952	3.92439	3.38779	3.74055	4.78291	4.85527	3.88079	0.311936	0.297919	1.26108	1.24763	5.59958	5.44695	1.49043	5.14802	8.46494	8.88433	10.9019	11.3564	3.11816	2.51217	2.7796	3.75827	6.28056	6.22068	26.9145	0.901401	-0.487641	3.19361	3.71848
cluster5	2.59622	2.71426	0.533884	0.697875	3.67984	3.73444	4.50831	4.53945	3.20738	3.78978	4.3197	4.58901	4.08813	0.271413	0.26267	0.908283	1.13096	4.35308	4.63049	1.41485	4.85694	6.47292	6.95226	9.20273	9.30236	3.19055	2.23653	2.94971	4.40118	5.69718	6.10303	26.7574	-0.403731	0.131064	3.97539	2.87195
cluster3	3.27313	2.9298	0.898843	0.820952	4.24232	4.66939	4.21041	4.60045	4.17253	4.61997	4.9395	4.9033	4.08323	0.346573	0.346139	1.61624	1.51312	6.90932	5.95038	1.80752	5.82498	9.90036	9.08795	11.8581	11.6873	3.76061	3.02438	3.26199	4.25161	7.5277	7.72046	25.9573	1.47283	-0.549578	2.63765	2.82447
cluster5	2.55865	2.65372	0.617854	0.701482	3.96624	4.22956	4.28888	4.28562	3.24889	3.89753	4.62111	4.79127	4.30842	0.309337	0.307607	1.17656	1.20918	6.07139	5.58392	1.48572	5.09495	9.18363	8.80136	11.4694	11.221	3.43748	2.43413	2.83	4.19092	6.1306	6.48207	22.8002	-0.866953	0.468527	3.82506	3.47789
cluster5	2.55295	2.66742	0.618897	0.77995	4.16124	4.19729	4.1989	4.41036	3.84929	4.05708	4.68978	4.77581	4.01684	0.33269	0.312507	1.22185	1.66496	6.32329	6.43438	1.79602	5.4906	9.87171	9.87547	11.7023	11.1371	3.8695	2.70464	3.32495	5.11975	7.01587	7.58155	27.8574	1.51276	-0.168777	2.58859	2.70361
cluster5	2.88	2.6686	0.711994	0.720872	4.11372	3.95592	3.45176	4.04199	3.49067	3.77586	5.38427	5.57392	4.16186	0.314506	0.314046	1.37988	1.41069	5.97953	6.16436	1.65238	5.00924	9.51407	10.1179	12.2067	13.0731	3.46903	2.68799	3.14945	5.03433	7.06052	7.29551	28.0859	0.497018	-0.873918	2.62038	2.81961
cluster5	3.04214	2.72933	0.733438	0.743997	4.27187	4.22447	4.15901	4.03462	3.70191	3.94698	5.52212	5.52829	4.07214	0.318085	0.32263	1.3768	1.35494	5.94612	5.62396	1.67795	5.70451	9.36299	8.67801	11.7226	10.8166	3.58849	2.76274	3.0408	4.1631	6.47547	6.54625	27.0288	1.87966	-0.292386	2.35607	2.03599
cluster4	2.60383	2.45422	0.61931	0.646612	3.53576	3.75802	3.45409	3.59719	3.27897	3.66451	4.28273	4.15614	3.68948	0.265816	0.267658	1.11301	1.17567	5.9241	5.42712	1.39235	5.21607	8.82558	8.48699	9.44658	9.75824	3.36529	2.55094	2.94896	3.50164	6.29781	6.19966	27.8859	-0.777562	0.346453	3.79816	2.37739
cluster5	2.84006	2.63581	0.667286	0.694507	3.99428	4.03465	4.0066	4.2482	3.40267	3.82636	5.17682	5.07301	4.09377	0.313034	0.315199	1.29671	1.29744	5.85186	5.3702	1.68007	5.04171	9.59463	8.4246	11.487	9.81796	3.58985	2.68157	2.99093	4.46916	6.29125	6.13259	25.9002	1.33171	0.168686	2.8621	2.51141
cluster2	2.33679	2.19894	0.496525	0.460718	4.19465	4.43349	3.89031	4.02238	3.73378	4.15238	4.34713	4.38233	3.62814	0.291035	0.296529	1.07	0.98582	5.91735	5.3555	1.87827	4.60483	8.51762	8.0594	10.5678	9.31653	3.09318	2.47046	2.72669	4.30682	6.25292	6.1192	27.9002	-0.380157	0.0805303	3.21527	3.11865
cluster5	2.88022	2.59868	0.62009	0.60618	3.46438	3.51319	3.97687	4.01827	3.0617	3.57175	4.76609	4.79903	3.96902	0.287944	0.278337	1.24302	1.16766	6.08941	5.63275	1.55465	5.4717	9.27948	8.50787	11.0813	11.048	3.01382	2.48979	2.79262	4.14275	6.87779	6.46491	28.9573	-0.784587	0.33378	2.83139	2.56129
cluster4	2.64125	2.43105	0.657173	0.618183	3.66871	3.85371	3.22728	3.85834	3.30335	3.57605	4.85705	5.05279	4.11514	0.319476	0.318881	1.24652	1.0559	6.46246	5.63455	1.61288	4.75762	9.21395	8.17362	11.4638	9.66084	3.14162	2.34335	2.66163	4.13543	6.46985	5.70505	26.9431	-0.373085	0.0653702	2.79035	2.26539
cluster4	2.58121	2.44498	0.607149	0.63446	4.27873	4.44007	4.52222	4.2181	3.56298	3.77306	4.82553	4.78438	3.97221	0.317081	0.303893	1.15509	1.23863	5.3683	5.30697	1.70623	4.49102	8.22571	8.76299	10.5118	9.98288	3.15252	2.37948	2.62002	4.60992	6.53399	7.14277	25.0145	-0.361298	0.0401035	3.23156	2.49329
cluster5	2.71812	2.68076	0.724281	0.736954	3.47341	4.21801	3.69545	4.0863	3.22759	3.71043	4.36737	4.56776	4.17948	0.295434	0.287156	1.34739	1.4251	5.75008	5.25834	1.51691	4.7674	9.38208	8.90661	11.1245	10.52	3.2468	2.47301	2.99166	4.59037	7.35287	6.99274	27.8716	-0.384872	0.090637	2.78898	2.48886
cluster5	2.74834	2.6888	0.697362	0.707124	4.29859	4.23763	3.78437	3.93696	3.84953	4.32928	4.75439	5.07041	3.97019	0.318041	0.323557	1.32771	1.42295	6.13608	6.07508	1.74372	5.38062	8.93062	9.42624	11.1806	11.3889	3.38588	2.69021	3.18085	4.32458	6.94742	7.09799	27.9145	-0.3778	0.0754769	2.33093	2.1731
cluster4	2.70754	2.53563	0.6699	0.65828	4.27796	5.1705	4.70544	4.80753	3.90452	4.25643	4.98561	5.26364	4.01712	0.372851	0.360408	1.2279	1.2365	6.38445	6.20623	1.83028	5.73447	8.9986	8.68891	11.161	10.2618	3.60564	2.71096	3.07178	4.70508	6.63091	6.76371	23.8716	-1.04328	1.18989	3.99935	2.68292
cluster3	3.60022	3.31492	0.789033	0.837439	4.85397	4.96228	4.71819	5.29937	4.537	4.97955	5.77276	5.8057	4.20077	0.412014	0.418236	1.56036	1.66276	7.45471	7.33725	2.34831	6.11893	10.9728	10.9595	13.3578	13.2291	3.93108	3.12643	3.5643	5.4762	7.62685	8.10437	28.1145	2.13836	-0.419857	2.49321	1.96816
cluster5	2.87432	2.68343	0.688141	0.653852	3.83198	3.91668	4.57793	4.41557	3.66534	4.23869	4.36141	4.66078	3.8384	0.299634	0.322769	1.48695	1.32219	6.16017	5.66587	1.63523	5.45067	9.3006	8.30528	10.7196	9.87889	3.85501	2.73132	2.97906	4.43904	7.31232	6.77737	28.9431	-0.805756	-0.422186	2.95879	2.36769
cluster4	2.74629	2.51476	0.655251	0.620942	3.35786	3.44096	3.87838	3.9741	3.31026	3.52206	4.50912	4.57208	3.94347	0.273416	0.271829	1.34303	1.2263	5.88365	5.54565	1.53408	4.37878	9.12465	8.72304	11.5306	11.2249	3.14736	2.53508	2.78737	4.19445	6.79576	6.35329	26.043	-0.356583	0.0299968	2.65974	2.18543
cluster2	2.55608	2.25585	0.590069	0.51179	3.3483	3.36793	3.61533	3.79932	3.40037	3.61181	4.08843	4.03879	3.69245	0.245846	0.266139	1.04424	0.891634	5.09474	4.59125	1.37507	4.19717	7.42245	6.28906	8.73809	7.06382	2.96011	2.42341	2.48479	3.84515	5.80168	4.77053	24.0002	-1.04088	0.329414	3.35377	2.52547
cluster3	2.91644	2.85158	0.688656	0.805257	3.64639	3.85061	3.85581	4.20887	3.55349	3.88594	4.95375	4.50136	3.89304	0.344882	0.313274	1.40642	1.71787	7.20885	6.97623	1.75399	6.09697	10.9041	10.4596	12.6732	12.1529	3.93493	2.79605	3.37515	3.36882	6.72989	7.81345	27.9716	-0.725794	2.03607	2.35165	2.6992
cluster4	2.68566	2.53269	0.640864	0.608255	3.45442	3.54211	3.71188	3.79592	3.03102	3.39254	5.15089	5.14694	4.08323	0.270959	0.27815	1.15422	1.12653	5.42195	5.5424	1.58797	5.29379	8.30332	7.90921	10.1485	9.32353	3.3169	2.47381	2.85504	3.90986	5.44096	5.13812	29.0002	0.727427	-0.985727	3.18176	3.19687
cluster2	2.36672	2.26746	0.502728	0.532411	3.7738	3.93036	3.97509	3.95321	3.41213	3.76755	5.02989	5.16964	4.00746	0.262184	0.283861	0.990361	1.02195	5.91564	5.35674	1.56722	4.98354	8.70524	7.8111	10.2078	9.19306	3.70172	2.21254	2.70777	4.37589	6.20418	6.03691	26.9002	-0.850451	0.891924	2.69241	2.0671
cluster5	2.90376	2.73973	0.721263	0.72219	4.35786	4.08581	3.83445	4.06917	3.71663	3.9285	6.19404	6.2004	4.40782	0.340474	0.339288	1.46066	1.43301	6.47967	6.33975	1.82683	5.96428	9.60566	9.91836	12.3578	12.2334	3.98102	2.73668	3.08983	4.2843	7.17009	7.21007	26.1573	-0.337724	-0.01043	2.51247	2.45054
cluster5	2.93604	2.72578	0.794513	0.813768	3.81919	4.16974	3.82014	4.27915	3.47067	3.80066	4.88263	4.90138	3.87343	0.334621	0.337989	1.59738	1.50011	6.96894	6.70355	1.72698	5.7545	10.2837	10.5904	12.621	12.5943	3.92306	2.93924	3.19712	4.55315	7.58916	7.73597	26.0002	-0.363655	0.0451568	2.90964	2.31939
cluster5	2.88283	2.64794	0.676756	0.685012	4.28119	4.21569	4.01523	3.96098	3.39809	3.86487	5.59204	5.47793	3.9431	0.28612	0.305624	1.37822	1.31734	6.04776	6.13815	1.70211	5.37031	9.54577	9.35357	12.4349	10.6857	3.75973	2.73581	3.09172	4.506	6.686	6.56769	26.1002	-0.347154	0.00978336	2.30225	2.22235
cluster4	2.52447	2.53617	0.550231	0.531128	4.21421	4.14239	4.07237	4.52969	3.33877	3.73166	4.98146	5.19758	4.12923	0.297754	0.326774	1.04689	1.05739	6.14204	6.20824	1.93779	4.7812	8.93443	8.53385	10.3209	10.3268	3.66428	2.67094	3.07725	4.88515	5.97259	5.9071	24.0145	-0.963275	1.46319	2.8438	2.12413
cluster2	2.38955	2.2185	0.572309	0.549633	3.51432	4.17241	3.97403	4.03999	3.49889	4.14937	4.99868	4.94515	4.38827	0.314919	0.327016	1.14271	1.16978	5.58556	5.51063	1.82087	4.33381	9.26009	8.73908	11.5971	10.6172	3.28245	2.60446	2.9194	4.11921	6.52631	6.53993	23.8288	-0.391944	0.105797	3.6597	3.02443
cluster2	2.62714	2.2317	0.569519	0.548467	3.40206	3.5017	3.44209	3.74613	3.33762	3.70343	3.9225	3.90014	3.7571	0.254454	0.260072	1.09799	1.02945	5.06365	5.02803	1.26584	4.96824	7.97338	8.13394	9.8114	9.98899	3.11648	2.43998	2.62734	3.84627	5.67031	5.99248	22.8574	-0.387229	0.0956903	3.47871	3.08146
cluster5	2.96844	2.61489	0.660516	0.612458	3.89651	4.00157	3.99561	4.12498	3.30847	3.79279	5.07342	5.17709	4.11506	0.305623	0.294876	1.16188	1.2477	5.3419	5.29031	1.83785	5.2068	7.64037	7.79212	9.57722	9.53968	3.30626	2.49989	2.84913	4.42374	6.50293	5.85852	26.0288	-2.39626	-0.0387129	3.11045	2.70665
cluster4	2.58338	2.364	0.605728	0.589894	3.76192	3.60967	3.92077	3.92003	3.49288	3.8578	5.0348	5.0342	4.11612	0.299422	0.292522	1.08761	1.14455	5.49058	5.40621	1.64772	4.99217	8.71698	8.48139	11.0597	10.2066	3.22934	2.37717	2.78391	4.61567	6.4826	6.32745	27.9859	-1.70541	0.0879913	2.79956	3.0837
cluster5	2.93985	2.62591	0.684467	0.67479	3.94239	4.52987	3.6414	4.35569	4.01965	4.26089	4.73928	4.81242	4.17975	0.331033	0.32456	1.21707	1.18758	6.32692	5.80523	1.55637	5.35158	8.80789	7.91846	11.1826	9.65296	3.54404	2.74642	3.0389	4.10179	6.71105	6.64842	26.8288	-0.391944	0.105797	3.39797	2.19051
cluster3	3.06991	3.01274	0.761183	0.780068	4.57168	4.56015	4.66244	4.70877	4.02426	4.62195	5.35642	5.66787	4.27705	0.322675	0.319745	1.47813	1.42957	5.99383	5.86233	1.74852	5.38612	9.22517	8.28438	11.7123	10.3565	3.72405	2.60569	3.0756	5.18297	7.0949	7.27378	29.0573	-0.354226	0.0249434	2.3324	2.12413
cluster2	2.13305	2.09788	0.504162	0.512828	3.60232	3.6349	3.6466	3.82076	3.01972	3.3832	3.83767	3.94271	3.75088	0.266059	0.259114	0.960917	1.02805	4.60749	4.88953	1.50395	4.44669	6.81654	7.11257	9.21827	9.51872	2.73026	2.16581	2.67548	3.33901	5.67858	6.24966	25.7717	-0.702362	1.78298	3.60284	2.13266
cluster2	2.48747	2.2885	0.623843	0.574795	3.53258	3.6783	3.66446	3.69151	3.35598	3.64132	4.1619	4.13675	3.79272	0.262737	0.262207	1.25119	1.14785	5.15609	5.06755	1.43734	5.03911	8.14613	8.01663	10.3433	10.0741	2.92788	2.35158	2.65683	3.59476	6.08437	6.2139	27.8288	1.13181	-0.194653	2.50819	2.55938
cluster5	2.90855	2.60203	0.791262	0.751798	3.37943	3.66869	3.23213	3.85035	3.8113	4.13626	4.77255	4.87186	3.76736	0.29532	0.294043	1.51935	1.42256	6.05172	6.00287	1.63745	4.61691	9.92006	8.99048	11.5386	11.1841	3.35002	2.81901	3.17989	3.99221	7.40298	6.89311	26.0145	-0.361298	0.0401035	2.27845	2.62292
cluster5	2.27627	2.58826	0.649417	0.658065	3.70814	4.10224	4.60514	4.72577	3.47556	3.6172	4.05445	4.08838	3.54231	0.321659	0.334031	1.36896	1.38212	6.06286	5.2763	1.98761	4.5328	9.76513	8.28804	11.7107	11.0597	3.21095	2.6888	3.12194	4.22015	6.9471	6.92478	23.8002	1.63501	-0.204336	2.76495	1.99218
cluster5	2.8804	2.60623	0.645376	0.634682	5.02823	4.79122	5.4198	5.03441	3.70791	4.24788	4.64412	4.64573	4.12121	0.306947	0.302631	1.34749	1.42559	5.87336	5.79751	1.80656	5.15815	9.41325	9.06369	12.4829	11.5229	3.4215	2.80537	3.15526	4.86852	6.68893	7.46634	23.9431	-1.40773	4.58291	2.71315	2.6034
cluster4	2.41031	2.38401	0.619146	0.588123	3.49845	3.71239	4.15809	4.26828	2.92334	3.48495	4.07918	4.02033	3.44558	0.282044	0.276499	1.25331	1.21078	5.83206	5.50263	1.47708	4.1704	8.29839	8.06282	10.5064	9.89899	2.95486	2.53572	2.88565	4.42228	6.52526	6.52409	26.7717	-0.401373	0.12601	3.11414	3.05887
cluster5	3.03783	2.72915	0.7548	0.76019	4.209	4.30469	3.72954	3.90315	3.4604	3.68532	5.03593	5.11954	4.48847	0.300746	0.302916	1.52298	1.43616	6.40024	6.05067	1.57564	5.1997	10.0809	9.53789	12.7729	12.5364	3.69951	2.73334	3.02131	4.41506	7.0127	7.43965	29.0002	-0.984444	-0.233704	2.9396	2.49277
cluster4	2.65232	2.53326	0.679523	0.706036	4.35843	4.40853	4.48658	4.37101	3.42194	3.94387	6.25848	6.02657	4.74857	0.368091	0.360174	1.3175	1.33674	6.16499	5.96721	1.68474	5.22055	9.404	8.99436	11.0312	10.7033	3.46697	2.5788	2.97387	5.20275	6.57057	7.16853	27.0716	-0.935034	0.201599	2.81382	2.08777
cluster4	2.69021	2.42569	0.662319	0.642733	3.29416	3.55351	3.39162	3.62722	3.03474	3.34605	5.04749	5.19041	4.06932	0.25853	0.263231	1.28816	1.31338	5.69358	5.25389	1.31307	5.73891	8.00548	7.48963	9.39547	9.78604	3.28424	2.5167	2.79724	3.67705	5.57372	5.64277	29.2144	0.743976	-0.881617	2.32089	2.21926
cluster3	3.43431	3.15133	0.795447	0.817886	4.45691	4.73803	4.13949	4.48497	4.27492	4.69872	6.45497	6.57172	4.77201	0.35731	0.369882	1.53686	1.52684	6.7345	6.14946	2.08727	6.73352	10.2339	9.69607	13.1659	12.6274	4.01275	3.01804	3.28072	4.52902	7.52161	6.99154	29.0716	-0.0696921	-0.575612	1.85179	2.44864
cluster3	3.39152	3.10009	0.846131	0.818588	4.0261	4.63197	3.52507	4.5989	3.91933	4.16481	5.72203	5.57654	4.07318	0.367862	0.395553	1.62188	1.53877	7.28762	6.71478	2.0482	5.83398	11.0385	10.6729	14.2618	12.8887	4.18255	3.04237	3.30954	4.80132	7.6252	7.78389	29.1002	0.311258	-0.990516	2.06394	2.63007
cluster4	2.47308	2.33717	0.61858	0.637771	3.06061	3.47761	3.2926	3.90122	3.12733	3.68296	4.14793	4.26253	3.9465	0.282516	0.273773	1.199	1.2285	5.66915	5.41936	1.41717	4.65075	8.42755	7.84986	10.451	9.95874	3.23081	2.45765	2.883	3.66376	5.77549	6.30339	26.9288	-1.05267	1.13369	3.14634	2.79241
cluster4	2.61988	2.35792	0.592573	0.584272	4.01176	4.1223	4.10877	3.89537	3.23076	3.32306	5.15533	4.87168	4.15601	0.27007	0.273237	1.09475	1.03545	6.26703	5.48941	1.51673	4.76067	9.35611	7.90906	10.3075	8.58457	3.35321	2.46918	2.67601	3.97223	6.59796	5.78361	24.9859	-0.366013	0.0502102	2.85361	2.57806
cluster5	2.74759	2.53843	0.736814	0.782566	4.83369	4.69304	4.64581	4.64261	3.83599	4.46095	5.28061	5.26637	4.08382	0.317402	0.329833	1.50911	1.53727	7.161	6.68801	1.8453	6.10157	10.7331	10.3596	13.6325	12.9404	4.10532	2.98467	3.29406	5.00367	7.54004	7.67783	28.9716	-1.50084	-0.392712	2.63319	2.1021
cluster4	2.74807	2.54163	0.661195	0.652401	3.17463	3.26641	3.55455	3.67235	3.31544	3.78187	4.75565	4.64491	3.68247	0.281186	0.292067	1.32952	1.31497	6.01039	5.95093	1.46792	5.39019	9.17299	8.8809	10.8066	10.3238	3.48528	2.64289	3.15165	4.23698	5.89649	6.13837	25.9288	-0.187325	0.403257	2.49187	3.03158
cluster4	2.64079	2.45171	0.608015	0.611626	3.425	3.86529	3.30166	3.67968	3.17726	3.69225	4.91641	5.11237	4.21801	0.300565	0.289314	1.28326	1.23192	6.76084	6.05862	1.52284	5.21465	9.31361	8.81857	10.2618	10.1537	3.85892	2.80563	3.05627	4.25204	6.49079	6.53842	27.0145	-0.888028	0.399923	2.75744	2.54106
cluster2	2.49515	2.30763	0.540319	0.535562	3.68125	3.48806	3.74447	3.75654	3.48934	3.79733	4.97062	4.9492	4.19382	0.25767	0.249442	0.99081	0.988956	4.88079	4.63374	1.294	4.807	7.42664	7.83606	9.39141	10.355	3.05924	2.26511	2.5167	4.09052	5.97126	6.27054	23.8145	-0.563607	0.348331	2.83948	2.34866
cluster2	2.27418	2.11603	0.548127	0.518722	2.87293	3.05607	3.06904	3.23835	2.787	3.09378	3.83849	3.9567	3.39765	0.242326	0.250319	1.01486	0.967132	4.80652	4.75622	1.2589	4.28456	7.09287	7.06268	8.17584	7.48563	2.83048	2.0585	2.41919	3.38543	5.23788	5.02795	25.9859	-0.366013	0.0502102	3.60291	4.06222
cluster5	2.90666	2.73247	0.696972	0.706307	4.84241	4.94313	4.14878	4.82638	3.65307	4.18188	5.68142	5.69098	3.94043	0.336053	0.314497	1.36238	1.43576	7.21536	6.98814	1.82389	6.13204	10.9633	10.479	13.1337	12.496	3.95015	2.62839	3.16693	4.67244	7.07542	7.31056	29.1573	-0.337724	-0.01043	2.33639	2.59634
cluster5	2.74362	2.64815	0.617424	0.621344	3.91653	3.67419	3.0582	3.51306	3.84694	4.07619	5.15872	5.3649	4.6223	0.266543	0.259986	1.10328	1.16765	5.97333	6.18496	1.54114	4.76954	8.42794	8.71653	10.7262	10.4138	3.08973	2.55803	2.89888	4.18904	6.13834	6.35773	25.1002	-0.648142	0.231073	3.08895	2.16078
cluster2	1.97702	2.2093	0.40044	0.554644	4.31963	4.17138	4.14818	4.2401	3.34835	3.94945	4.23122	4.73438	3.84658	0.274067	0.24912	0.732149	1.08104	4.72644	5.07563	1.6974	5.8566	7.50641	8.46951	9.89045	10.9594	3.53421	1.91474	2.70818	4.72433	5.36725	6.56446	22.8288	-0.391944	0.105797	3.14674	2.21567
cluster5	2.82598	2.75312	0.663189	0.724171	4.33022	4.48287	4.52378	4.7234	3.56747	3.76853	4.3888	4.74606	4.02276	0.323239	0.320818	1.33259	1.45232	5.93332	6.15484	1.79296	5.28752	9.26226	9.45386	11.6424	10.973	3.3714	2.54879	2.93021	4.70045	7.43589	7.47561	27.9431	-0.95625	0.117544	3.07011	2.06991
cluster5	2.87201	2.61391	0.691566	0.673038	3.76752	3.92621	3.81934	3.90592	3.31579	3.76254	4.72049	4.62897	4.2612	0.301018	0.315424	1.40224	1.40072	6.4045	6.33441	1.7271	5.73545	9.20944	9.20869	10.8963	11.0834	3.74513	2.85007	3.2209	4.23718	6.99889	6.8848	27.8288	-0.617685	-0.370964	3.20735	2.30366
cluster4	2.70022	2.44053	0.686111	0.653339	4.16132	4.02126	3.83155	4.095	3.64188	4.04346	4.83573	4.5187	3.97159	0.321807	0.319814	1.34715	1.39453	5.95653	5.64756	1.69563	4.76086	7.8324	7.53337	9.68478	8.65781	3.27135	2.72187	3.05794	4.37722	6.46105	6.45341	28.9431	-0.373085	0.0653702	2.6855	3.00989
cluster3	3.3392	3.17934	0.82991	0.840059	4.44145	4.51343	4.18499	4.50693	3.68289	4.01129	6.12709	6.17521	4.36444	0.331318	0.34365	1.52038	1.53625	7.11687	7.37697	1.91687	5.69866	9.86833	11.105	12.23	12.7155	3.77482	2.7761	3.31613	4.56586	7.4597	7.30401	28.1287	0.598149	-0.0758855	1.73636	2.23894
cluster4	2.58243	2.44527	0.613641	0.629158	4.41377	4.51809	4.07837	4.59906	3.5373	3.61697	5.39574	5.20695	3.99074	0.299009	0.301782	1.2766	1.26158	6.23036	6.40738	1.84958	5.38055	8.92075	9.19972	10.2824	10.3414	3.72539	2.4723	2.97168	4.32356	6.7337	6.80819	27.0145	-1.0009	1.841	3.05748	2.57125
cluster4	2.70804	2.47106	0.587348	0.526395	3.32935	3.53497	3.96909	4.06488	3.66138	3.85785	4.11368	4.44131	4.04121	0.315028	0.318447	1.16224	0.976039	5.94134	5.22594	1.53715	5.60772	8.59924	8.77471	9.79277	9.66402	3.27672	2.5048	2.6885	3.68138	6.05527	6.16198	22.8574	0.158312	0.106485	3.59267	2.5578
cluster4	2.60244	2.41912	0.607968	0.561534	3.29634	3.70456	3.48045	3.59208	3.55583	3.93456	4.99324	5.17036	3.95756	0.292963	0.316872	1.13709	1.04738	5.47559	5.21819	1.66162	4.93959	8.35845	8.63644	11.0707	11.5808	3.29737	2.43756	2.80184	4.31515	6.41074	6.1172	26.8859	-0.382514	0.0855836	2.78397	2.34186
cluster5	3.00139	2.80871	0.764409	0.751499	3.86108	4.60887	4.18761	4.13891	3.72325	4.25412	4.43583	4.78876	3.89654	0.307119	0.309807	1.46271	1.50146	6.36623	6.25493	1.62065	5.07666	9.69318	9.88697	12.0972	11.7193	3.65271	2.95851	3.35474	4.44382	7.1573	7.28851	27.9573	1.00253	-0.734885	2.9861	3.04729
cluster4	2.65341	2.35699	0.655733	0.658217	3.53059	3.70464	3.14284	3.67081	3.40431	3.7321	4.46177	4.3282	3.49376	0.299319	0.301013	1.29161	1.27665	5.6867	5.66927	1.55547	5.55104	8.79493	8.65526	10.9669	10.476	3.31939	2.59314	2.94915	4.04363	6.07997	5.80141	27.8431	-0.540081	0.100744	2.74524	2.33657
cluster5	2.77521	2.6734	0.63163	0.634806	3.69322	3.86613	3.27591	3.62135	3.46369	3.94734	4.17717	4.14018	3.98025	0.258935	0.260184	1.24615	1.20839	5.24391	4.7049	1.38452	4.38326	8.38118	6.98124	9.87615	8.66093	2.89934	2.57003	3.06158	3.90536	6.06398	6.42742	23.7717	-1.62226	1.22526	3.53456	2.57547
cluster4	2.63214	2.42502	0.730137	0.708361	3.13063	3.73017	3.48018	3.90853	3.07286	3.55651	5.11548	5.06165	3.87374	0.294145	0.296565	1.4044	1.24976	6.42117	6.06055	1.46702	5.47688	9.80936	9.1753	12.2336	11.7552	3.63871	2.64659	2.8875	4.09633	7.17879	6.57652	28.0573	1.24477	-0.185551	2.26611	2.60206
cluster4	2.55094	2.40253	0.610442	0.617013	2.95066	3.52568	3.79785	3.9279	3.03403	3.475	4.66712	4.80225	4.15926	0.279734	0.2792	1.19675	1.14275	5.26178	5.12244	1.48948	4.68082	7.89918	7.17443	9.21503	8.67343	3.25731	2.55085	2.88429	3.6763	5.78695	5.51322	24.9288	-0.413066	-0.503489	3.62372	2.30299
cluster4	2.63977	2.45681	0.673538	0.640885	3.97774	3.83893	3.92045	4.24387	3.08296	3.43592	5.3645	5.41323	4.24175	0.305449	0.311364	1.23106	1.14548	6.00661	5.60223	1.69826	5.42456	8.9818	8.24588	10.7851	10.3959	3.50006	2.60087	2.88373	4.04192	5.87186	5.82728	24.0859	-0.349511	0.0148367	2.6187	3.82518
cluster4	2.80033	2.4257	0.698979	0.56007	4.00248	4.22964	3.83241	4.02971	3.76956	3.91167	5.61684	5.53279	4.43884	0.273191	0.302201	1.37934	1.10261	6.35522	5.48767	1.78663	5.33177	9.34422	8.22785	10.8963	10.4288	3.73037	2.74365	2.82902	4.28274	6.70398	6.07193	28.0859	-0.349511	0.0148367	2.31624	2.36192
cluster4	2.80723	2.55803	0.677155	0.6662	3.7246	3.71386	3.42313	3.66671	3.66913	4.00995	5.08158	5.07081	4.1152	0.303415	0.322023	1.29603	1.27901	5.80347	5.73983	1.57505	5.24889	9.71989	9.31016	11.9757	10.5407	3.26732	2.71566	3.10143	3.64633	6.38065	6.85714	28.8716	-1.11853	0.106829	2.9013	2.19653
cluster1	2.21655	2.01382	0.429669	0.454893	3.63008	4.25493	4.17643	4.13359	3.24075	3.48577	4.35346	4.34509	3.81563	0.256317	0.250764	0.773971	0.825044	4.72778	4.80224	1.42697	4.25646	7.0581	7.56508	8.57975	8.67849	2.88844	2.06207	2.35822	4.23428	5.00921	5.30505	25.8431	-0.389586	0.100744	3.21874	3.09657
cluster1	2.09468	1.94571	0.419303	0.381565	3.64756	3.7518	3.67873	3.76773	2.99416	3.37153	3.29519	3.35974	3.32598	0.207885	0.213848	0.714691	0.667557	5.0971	4.81989	1.323	5.2045	7.22504	6.6412	8.87775	8.54078	3.318	1.99349	2.31601	3.54036	4.65526	4.62572	27.9288	0.696829	-0.386548	3.20039	3.49304
cluster4	2.78088	2.54197	0.677029	0.668606	4.2015	4.09817	4.17063	4.3842	3.37021	3.5553	4.6348	4.59704	4.23355	0.304467	0.289119	1.28597	1.26699	6.31235	5.95137	1.68277	4.88249	9.80673	9.8227	11.7484	11.389	3.22672	2.72456	3.05931	5.04384	7.01144	7.0196	26.8431	-0.389586	0.100744	2.967	2.34375
cluster4	2.57335	2.4012	0.578341	0.591643	3.66583	4.23516	3.94091	4.36434	2.91765	3.19048	5.07006	5.16776	4.20395	0.264266	0.2628	1.07625	1.09988	5.68283	4.87561	1.52603	4.73497	7.87409	7.90545	9.54821	8.93344	3.37927	2.39556	2.65371	4.186	6.11308	6.00267	24.9859	-0.366013	0.0502102	2.95188	1.91799
cluster4	2.59029	2.53874	0.582702	0.634853	3.56836	4.17316	3.63803	4.06696	3.62142	4.08826	5.23117	5.15754	3.93271	0.311893	0.327767	1.13273	1.22807	5.57671	5.05958	1.48246	4.1464	8.01576	7.05043	9.49252	9.34287	2.86618	2.65325	3.0763	4.15625	5.70888	5.79446	28.8145	0.245299	0.832289	2.99166	2.42655
cluster4	2.72621	2.43963	0.729878	0.733935	4.21546	4.33082	3.54257	4.1456	3.42728	3.75766	5.80272	5.73138	4.15307	0.320102	0.31981	1.44327	1.38803	6.52753	6.321	1.81139	5.42382	10.2185	9.71463	11.6677	11.5214	3.60913	2.61397	2.86383	4.46005	7.08052	6.42738	28.2002	-0.330652	-0.0255901	2.3341	2.32236
cluster4	2.64606	2.56103	0.662	0.656079	3.3608	3.93978	3.19617	3.79739	3.78305	4.11004	4.63495	4.61631	3.89674	0.293424	0.297761	1.30675	1.18911	6.73375	6.50249	1.72429	4.70633	10.8158	10.7896	12.7579	13.0933	3.12154	2.63843	2.78794	3.62409	6.79689	6.03629	29.0002	-0.363655	0.0451568	2.7223	3.50008
cluster4	2.78313	2.53245	0.721564	0.713773	4.13946	4.16324	3.82619	4.34644	3.87288	4.26746	5.6481	5.52847	4.14401	0.328749	0.334747	1.41912	1.34965	6.89638	6.42413	1.84447	5.63234	9.42914	8.84396	10.926	10.4644	4.05788	2.75046	3.01834	4.69079	6.84369	6.81719	29.143	1.29654	-0.723217	2.04996	2.75836
cluster5	2.91789	2.74188	0.796531	0.762056	4.25831	4.79316	3.83286	4.43934	4.13827	4.65112	5.48207	5.50825	3.75945	0.357731	0.335439	1.58973	1.4092	6.81676	6.3812	1.88834	6.20027	10.6311	9.75467	12.4951	11.8559	3.74517	2.89145	3.03168	5.34549	7.68844	7.28875	29.1716	-0.335367	-0.0154834	2.17093	2.50371
cluster3	3.07135	2.85062	0.832227	0.771358	4.09093	3.86205	3.69954	4.29561	4.05897	4.06045	5.63322	5.50271	4.06372	0.346797	0.352049	1.55038	1.50311	6.8457	6.05233	1.79081	5.65117	9.598	8.79451	12.0274	12.5777	3.66008	3.10467	3.44814	4.75155	6.67578	6.99895	28.0716	1.15307	-0.782508	2.47103	2.25561
cluster4	2.6479	2.50022	0.686838	0.647176	3.14089	3.52409	3.50814	4.01034	3.47217	3.97315	4.7763	4.90454	3.83439	0.270195	0.298586	1.3177	1.27026	6.0644	6.15549	1.45641	5.46665	9.53564	9.42423	11.3549	11.4792	3.69877	2.59974	2.93704	3.96758	6.95258	6.87637	26.043	1.29885	-0.53492	2.64206	2.71441
cluster4	2.68793	2.53026	0.623674	0.629963	3.19052	3.41952	3.21191	3.22166	3.45761	3.89043	4.77176	4.83682	3.88519	0.295581	0.297279	1.19018	1.19984	5.72156	5.88172	1.47619	5.39513	9.0234	8.6439	10.9682	10.4907	3.3435	2.41875	2.81311	3.39987	6.11161	5.98589	23.043	-0.356583	0.0299968	2.48506	3.00395
cluster5	2.88495	2.63394	0.722147	0.729708	3.95055	3.86555	4.22117	4.34781	3.71659	4.02493	5.35821	5.31553	4.18157	0.310832	0.307909	1.3251	1.3729	6.84103	5.94501	1.60773	6.06147	9.62601	9.07459	12.1592	11.0248	3.93571	2.70522	2.95717	3.82602	6.57016	6.3752	26.0573	0.511115	-1.07611	3.21827	2.5383
cluster3	3.30462	3.15203	0.823881	0.817492	4.65173	4.74109	3.85371	4.13602	4.0506	4.27877	6.80628	6.92139	4.95198	0.335577	0.354253	1.57356	1.50746	6.97792	6.86262	1.9636	6.38398	10.8801	10.1993	13.4994	13.0598	4.25714	3.01558	3.5658	4.84279	7.31323	7.12354	27.1287	0.240726	-0.439304	1.67573	2.1328
cluster4	2.47273	2.41889	0.577796	0.621638	3.42228	3.82568	3.86268	3.89692	3.51144	3.81125	4.66089	4.45738	3.75167	0.304194	0.326179	1.12403	1.1583	5.95653	5.67023	1.68298	5.27948	8.25401	9.09102	10.6064	11.5806	3.13336	2.47259	2.80074	3.32441	5.52367	5.66851	28.9145	0.656848	-0.656756	2.44366	2.22131
cluster5	2.96212	2.61318	0.771472	0.672813	3.98815	3.89726	4.57747	4.3024	3.6063	3.88392	4.82932	4.79812	3.89292	0.344504	0.38053	1.46148	1.27967	6.49929	6.46714	2.00218	5.84773	9.87628	9.48339	11.8583	11.0266	3.98372	2.86282	3.17118	4.50215	7.12197	7.01546	28.9145	0.656848	-0.514628	2.35571	2.08467
cluster4	2.64626	2.47844	0.709843	0.693454	3.69496	3.78374	3.42147	3.81256	3.60078	4.09028	4.72774	4.8655	4.21415	0.300696	0.317139	1.47788	1.38033	6.36081	5.71185	1.54923	5.75578	9.05883	9.31293	10.6913	11.4845	3.59305	2.88318	3.04405	4.20538	6.59086	6.78364	26.9716	-0.36837	0.0552635	2.67859	2.032
cluster4	2.77198	2.46744	0.699831	0.708721	3.56647	3.74777	3.29987	4.08472	3.39632	3.65257	4.44024	4.29041	3.65657	0.292225	0.289327	1.40868	1.38335	6.90586	6.04367	1.55239	5.66648	9.52675	8.73126	11.325	10.8181	3.57135	2.79942	3.0618	3.84147	7.35456	7.47728	25.0288	1.12719	-0.186239	3.13484	3.80744
cluster4	2.78291	2.46724	0.660387	0.623301	4.26089	3.91855	4.45139	4.49979	3.49476	3.61797	4.89031	4.51884	4.16178	0.316807	0.335901	1.19568	1.21382	6.48136	5.51082	1.79346	5.31265	9.52866	7.56266	10.8537	9.23957	3.86688	2.56733	3.03101	4.70404	5.83436	5.28993	24.8431	-0.558892	2.67525	3.14542	2.15338
cluster4	2.70841	2.45979	0.685349	0.648964	3.89186	3.85909	3.80794	3.83853	3.539	3.60427	4.93244	4.7626	4.21406	0.286078	0.323447	1.36245	1.23762	6.12583	5.59662	1.55727	5.11186	9.24167	8.41034	10.0453	10.3536	3.57426	2.71956	2.97708	3.88509	6.80701	6.48348	27.8859	-0.664691	0.216918	3.03763	2.49749
cluster4	2.73013	2.42295	0.646216	0.605765	3.22676	4.11568	3.85432	3.96283	3.66016	3.95128	5.25511	5.03833	4.02411	0.297166	0.322581	1.22732	1.13553	6.19016	5.47172	1.49659	4.80116	9.16653	8.47628	10.2777	9.92945	3.37865	2.5353	2.784	3.66293	6.25609	6.14809	26.8288	0.906068	-0.757771	3.20258	2.30699
cluster2	2.39375	2.28408	0.567626	0.584438	3.23746	3.43716	3.33954	3.54696	2.99713	3.24519	3.38923	3.47651	3.30394	0.254567	0.253996	1.06889	1.07498	5.14895	4.85423	1.36565	3.89968	7.32776	7.6473	8.27393	8.88294	2.9984	2.24243	2.58007	3.12122	5.44761	5.85211	27.8002	-0.189729	1.03524	3.2634	2.58117
cluster2	2.38262	2.15985	0.523483	0.465463	2.86155	3.1162	3.42803	3.46296	2.83617	3.34827	3.69186	3.93901	3.85667	0.227781	0.229936	1.00176	0.902234	4.57152	4.11012	1.1164	4.57984	6.04763	6.23336	7.80079	7.59939	2.63756	2.16883	2.55039	3.20305	5.08391	4.90683	26.7717	-0.401373	0.12601	3.54083	2.79812
cluster4	2.41103	2.33837	0.572956	0.590564	3.62311	3.70001	3.83567	3.61656	3.06341	3.4918	3.77516	3.68658	3.95377	0.257255	0.255479	1.15156	1.14132	5.17599	4.55527	1.32116	4.71531	8.09407	7.00392	9.81815	8.53178	3.11381	2.47768	2.90269	3.54085	6.193	5.84402	22.786	-1.26436	0.189323	3.80404	3.15711
cluster3	3.35596	3.25733	0.857665	0.833379	4.89657	5.09154	4.63175	5.07084	4.4026	4.77747	6.65485	6.78818	4.56792	0.358044	0.372086	1.6317	1.59358	7.57388	6.99411	2.21412	6.89322	11.2688	10.4058	13.5393	12.9774	4.63487	3.20718	3.55324	5.59664	8.07355	8.18518	28.1145	-0.344797	0.00473001	1.68757	1.86488
cluster5	2.71704	2.61446	0.613165	0.635856	3.81112	3.99155	3.45018	3.54419	3.76528	4.34768	4.49321	4.65305	3.76271	0.284475	0.304336	1.16123	1.14316	6.02872	5.71531	1.61744	5.24905	8.52644	8.56416	10.85	10.6246	3.68891	2.61247	2.99895	3.74695	5.8026	6.10821	28.9145	1.29645	-0.388691	2.75772	2.15412
cluster5	2.79414	2.70812	0.67089	0.680094	4.0071	4.12278	3.91529	4.09879	3.82777	4.3312	5.5277	5.77237	4.39335	0.315075	0.33909	1.23138	1.16853	6.06253	5.75474	1.63243	5.3471	9.05517	8.47533	10.8186	10.3843	3.72402	2.44937	2.88991	4.52482	6.1628	5.7956	29.0288	-0.641117	0.558588	2.27792	2.30506
cluster5	3.0487	2.78938	0.709322	0.729163	4.00316	4.06991	3.47576	3.72737	3.62934	3.9445	4.9749	5.096	3.96829	0.332562	0.338606	1.36025	1.34738	5.78411	5.57728	1.49614	5.43369	9.29234	9.06312	11.6219	11.8286	3.43864	2.58979	2.88786	4.25556	6.46433	6.43307	28.0288	0.638083	-0.731366	2.85997	2.39255
cluster4	2.69475	2.53643	0.608516	0.633075	3.53443	3.6479	3.64656	3.60975	3.42479	3.81681	4.60643	4.57745	3.87937	0.285376	0.276127	1.20289	1.19322	5.90601	5.64069	1.3664	5.12147	8.83096	8.99896	10.4	10.7229	3.57404	2.58508	3.05075	4.05813	6.2687	6.44146	24.9145	-1.28076	2.07428	2.84448	3.33534
cluster4	2.53818	2.34398	0.609407	0.628822	3.9915	3.82651	3.90783	3.81898	3.04245	3.37917	4.98553	5.01	3.95007	0.282948	0.286922	1.20132	1.23262	6.12284	5.62314	1.53106	4.70095	8.82195	9.18576	9.97844	9.92368	3.33003	2.4315	2.78805	4.48282	6.37183	5.78449	24.9859	-0.667001	0.807631	2.73031	2.08971
cluster4	2.67244	2.53489	0.683253	0.692259	3.61162	3.9518	3.6816	3.9889	3.38487	4.18369	4.69538	4.95771	3.72038	0.283186	0.295829	1.30329	1.28642	6.52311	6.15211	1.56568	4.9704	9.86197	9.35915	10.9289	10.852	3.3961	2.56579	3.02998	4.42084	6.325	6.21666	24.043	0.903805	-0.833571	2.65197	2.948
cluster5	2.73938	2.57028	0.669845	0.687428	4.11249	4.18459	4.01455	4.18788	3.72561	4.10367	4.85086	4.99415	3.85733	0.324212	0.306691	1.20341	1.24262	5.55287	5.75247	1.65285	4.94492	8.448	8.48694	10.3833	10.7954	3.46707	2.52332	2.93715	4.18595	6.52978	6.58369	24.8574	-0.387229	0.0956903	2.93646	2.08523
cluster4	2.57939	2.50978	0.698892	0.742388	3.70862	3.91992	3.80349	4.57145	3.90331	4.16223	5.27172	5.38459	4.42413	0.286834	0.283462	1.36199	1.41896	5.93309	5.6702	1.87594	5.90613	8.64713	8.44027	11.5589	10.3526	3.75737	2.67062	2.88691	4.70905	6.90268	7.06262	23.1002	0.894423	-0.765628	2.24581	1.65882
cluster5	2.83612	2.63088	0.718893	0.695027	4.47773	4.4966	4.06505	4.11071	3.95326	4.11904	5.17512	5.07898	3.9222	0.317734	0.328504	1.50493	1.46116	6.74655	6.3009	1.73812	6.04426	10.0399	9.12374	10.9514	10.7625	4.16315	3.01289	3.30664	4.68916	7.28119	6.54595	29.0573	-0.203732	-0.620933	2.87767	2.36246
cluster5	2.82208	2.64487	0.589938	0.676557	3.57575	4.02986	3.04288	3.74118	3.63171	3.94122	5.29469	5.2822	4.06361	0.315417	0.31598	1.25396	1.34962	5.8985	6.05728	1.65443	5.99988	9.38212	9.11895	12.4903	11.8771	3.84716	2.62105	2.92242	4.08953	6.22833	6.39092	28.0859	-0.349511	0.0148367	2.6294	2.41072
cluster3	3.26024	2.96449	0.791051	0.753823	4.1297	4.29926	3.5597	4.32316	3.71917	4.11528	5.99781	6.08634	4.78981	0.335831	0.318108	1.47397	1.41681	6.70315	6.4681	1.56109	4.88838	10.2191	9.98934	12.7787	12.0344	3.52081	2.88198	3.23786	5.01987	6.55188	6.51239	28.1145	1.27302	-0.664535	2.85411	1.74469
cluster3	3.07618	2.84958	0.733263	0.740756	4.80048	4.50686	3.68161	4.03386	3.70026	3.97721	6.17331	6.13167	4.30863	0.330911	0.342578	1.39475	1.49436	6.55592	6.41242	1.77655	5.37823	9.81349	8.76915	11.3384	10.6169	3.70295	2.63403	3.29318	4.92231	6.53122	6.6385	28.0288	-0.358941	0.0350501	2.19858	2.31518
cluster5	2.83669	2.6362	0.663479	0.694429	3.31499	3.21983	3.17932	3.45434	3.24267	3.57586	5.47781	5.5675	4.07005	0.2804	0.300862	1.35032	1.3404	5.54825	5.58694	1.55454	5.39312	8.37104	8.93203	10.5039	9.98567	3.31314	2.50707	2.81784	3.67335	6.62031	6.71149	29.0716	1.37881	-0.14023	2.23161	2.12748
cluster5	3.04562	2.78075	0.707868	0.710589	4.40542	4.60869	4.13825	4.67451	3.67245	4.14301	5.69603	5.6062	4.43099	0.336725	0.336162	1.48747	1.35989	6.36808	5.98893	1.69631	4.89053	9.8668	9.4337	12.3688	11.6513	3.65066	2.77434	3.10032	5.51702	7.89708	7.38331	29.0288	-0.716364	0.130402	3.19758	2.31626
cluster5	2.92217	2.64112	0.730052	0.72072	3.99265	4.19233	3.89675	4.04313	3.71129	4.05452	5.06737	5.20294	4.18093	0.31151	0.321175	1.29751	1.32956	6.56689	5.98193	1.71957	5.23969	9.88358	9.84365	12.034	11.8961	3.68498	2.80059	2.99113	4.20731	7.29622	7.5008	28.8859	-1.09736	0.699076	2.71741	2.77894
cluster4	2.40991	2.38938	0.46361	0.498219	3.76463	3.7525	4.02216	3.79664	3.19723	3.62458	4.02507	4.24209	3.75171	0.251232	0.243249	0.89172	0.948978	4.75103	5.10079	1.52793	5.52181	7.22279	7.4286	8.91133	9.15589	3.32064	2.27545	2.65296	4.30562	5.37235	5.57802	26.8716	-0.0838834	0.205779	3.75458	2.37587
cluster4	2.52496	2.39336	0.606413	0.619429	3.00528	3.02016	2.81616	3.35699	3.11489	3.47445	4.51953	4.5789	3.98767	0.280254	0.29175	1.19382	1.17055	5.51625	5.2212	1.38715	4.46114	8.0847	8.17568	9.10778	9.30734	2.93569	2.258	2.69299	3.39513	5.61176	5.98936	27.9145	-0.3778	0.0754769	2.56276	2.40186
cluster4	2.60537	2.41022	0.592112	0.517007	3.03562	3.44245	3.51893	3.83815	3.68759	3.88574	4.53103	4.59525	3.73587	0.276089	0.27494	1.1494	0.916379	6.03394	5.61795	1.69696	5.10961	8.4263	8.65561	10.0912	10.0601	3.60694	2.61854	2.78765	4.41581	5.86321	5.26608	27.9859	-0.497695	-0.502113	3.128	2.20466
cluster2	2.39573	2.29044	0.596267	0.636077	3.8213	3.96407	3.6032	3.86484	3.35832	3.76567	4.85914	4.95538	4.13068	0.277341	0.284777	1.13897	1.20716	5.93725	5.53882	1.71856	5.04398	8.16472	8.13311	8.83346	8.78947	3.35288	2.5848	3.0495	4.00964	6.04954	6.50577	24.8288	-0.185014	0.233533	2.48333	2.08172
cluster2	2.18632	2.19949	0.457616	0.459653	3.5052	3.70337	3.36455	3.73661	3.12321	3.71051	5.03728	5.16931	4.19839	0.288609	0.296907	1.00492	1.03707	5.31961	4.8342	1.53642	5.1906	8.08626	7.55456	9.86587	10.1707	3.50226	2.20304	2.51654	3.96908	5.97408	6.03283	28.043	-0.187277	-0.0419672	2.86576	2.52046
cluster4	2.56504	2.38317	0.638889	0.659823	3.75282	3.77396	3.90337	4.04382	3.28113	3.48645	4.45647	4.49678	3.92942	0.31383	0.306029	1.28815	1.25453	5.72563	5.59419	1.69917	4.42722	8.23588	7.73281	10.0704	9.33681	3.42567	2.61562	3.05517	4.35512	6.40551	6.07277	24.9431	1.62096	-0.441976	2.49559	2.10276
cluster4	2.69309	2.44633	0.747793	0.690571	3.60744	3.89912	3.93623	3.97213	3.50502	3.80846	4.42807	4.36385	3.85656	0.291981	0.312924	1.36244	1.31335	6.78074	5.7983	1.56024	4.42028	9.6125	8.34601	10.4313	9.49711	3.31063	2.68265	3.02748	4.02097	6.3211	5.69816	24.8716	-0.648237	1.38779	2.71639	2.09881
cluster3	3.03941	2.91369	0.765609	0.687038	3.42182	3.68598	3.18866	3.71374	3.22534	3.62555	4.89638	5.46162	4.16483	0.307287	0.320863	1.41601	1.34214	6.22398	6.08447	1.5061	5.75095	9.18791	8.87216	10.6631	10.8593	3.64338	2.61097	3.18813	3.91249	6.65782	6.41192	27.0002	1.44227	-0.471185	2.37109	2.05084
cluster5	2.78856	2.60307	0.69268	0.696605	2.97114	3.53914	3.64211	3.50136	3.14614	3.60525	5.2202	5.33764	4.28506	0.284027	0.280989	1.34223	1.28426	5.4519	5.26838	1.34624	5.07231	8.91321	8.83308	11.3399	11.1818	3.28111	2.51043	2.7927	3.973	6.4378	6.39341	26.1145	-0.344797	0.00473001	2.22113	2.15562
cluster3	2.82783	2.91952	0.589495	0.66376	4.14052	4.53464	4.43438	4.48607	3.46871	3.86106	5.6722	5.92094	4.47314	0.337895	0.318142	1.12807	1.29079	6.1085	6.75398	1.87514	5.60207	8.19685	9.47627	9.46987	10.5019	3.62336	2.63911	3.15288	5.00732	5.91412	6.90556	24.2144	-1.06195	0.582849	2.5088	2.33357
cluster2	2.39888	2.24832	0.557946	0.552565	3.51072	3.47069	3.26564	3.39324	3.24103	3.69931	3.68978	3.81097	3.44405	0.268465	0.253668	1.07249	1.07103	4.7589	4.91581	1.31185	4.13608	7.70421	7.96331	9.54044	9.59113	3.02465	2.34756	2.72314	3.7409	5.67333	5.6573	28.786	1.57622	-0.062551	3.12777	3.09208
cluster1	2.0267	1.97264	0.524738	0.465435	3.49021	4.09203	3.60553	3.89928	3.24697	3.65536	4.38176	4.72162	4.09098	0.273794	0.277801	1.0609	0.89913	5.79073	5.22018	1.53734	4.76174	8.74465	8.142	10.9601	10.2753	3.09999	2.19762	2.40218	4.00295	5.62911	5.90599	27.9716	-0.36837	0.0552635	3.27397	2.99359
cluster5	2.81291	2.80891	0.626804	0.695865	3.75739	3.73618	4.36643	4.9463	3.69803	4.33209	4.05439	4.1719	3.55057	0.316762	0.299505	1.24718	1.3389	5.85306	5.56273	1.89297	5.47998	8.92154	8.69923	11.6342	10.9509	3.24849	2.5953	3.0648	4.69394	7.39787	7.25011	27.8431	0.268826	-0.0305905	2.99987	2.00797
cluster5	2.61298	2.64379	0.597422	0.666604	4.20704	4.21153	4.05601	4.31332	3.77397	4.19583	5.4966	5.78097	4.46464	0.334799	0.313497	1.21416	1.36323	6.22113	6.26222	1.8073	5.7692	8.89151	9.30137	11.745	11.9275	3.66393	2.69357	3.20887	4.9935	7.07835	7.37697	26.1287	-0.925604	0.469242	2.05912	2.35783
cluster4	2.5638	2.38015	0.593515	0.622878	3.50388	3.86275	3.72667	3.92209	2.99749	3.507	3.95115	3.91251	3.63038	0.290654	0.277658	1.19957	1.21005	5.62581	5.39654	1.42871	4.6362	8.38079	7.93775	10.672	10.0539	3.26097	2.60241	2.92272	4.01078	6.10321	5.96757	23.7717	-0.401373	0.12601	3.91147	3.25807
cluster3	3.29529	3.15207	0.804541	0.832536	4.18555	4.76623	4.22673	4.7181	3.95863	4.15206	5.46483	5.65967	4.32581	0.350392	0.364016	1.62376	1.63973	7.81938	7.20589	2.21699	5.62791	11.724	10.6053	14.3285	13.4093	3.60634	3.12302	3.52204	4.74919	7.31256	7.66339	29.1573	-0.337724	-0.01043	1.92831	1.85674
cluster5	2.82158	2.7404	0.546501	0.614011	4.03951	4.20287	3.97644	4.08821	4.05126	4.54183	4.88667	5.04645	4.18301	0.296497	0.297131	1.14264	1.23372	6.18774	6.01018	1.82695	5.88104	9.98457	9.46055	12.7426	11.4891	3.53776	2.61344	2.91031	3.94694	6.41572	6.56325	27.9859	-0.366013	0.0502102	2.82827	1.95301
cluster5	2.94568	2.72612	0.763288	0.779447	4.08072	4.06457	3.93744	4.18996	3.41197	3.77201	5.18592	5.30313	4.07574	0.325828	0.342703	1.37336	1.3961	5.53027	5.88168	1.95096	5.2464	8.78881	8.54936	10.6322	10.321	3.37529	2.49849	2.99196	4.51118	6.34572	6.78296	29.0002	-1.3983	2.85355	2.22932	2.23689
cluster4	2.50463	2.42574	0.645141	0.637783	3.76079	3.9701	3.93767	4.12652	3.04217	3.82032	3.93632	3.88857	3.64191	0.266459	0.278154	1.24609	1.30531	6.03767	5.9475	1.4677	4.99334	8.65822	9.23093	10.7215	10.708	2.97669	2.7165	3.13513	4.51262	6.50843	6.89095	28.8002	-1.18675	1.35908	2.7721	2.19666
cluster4	2.56491	2.34558	0.603003	0.590889	3.54381	3.78058	3.22844	3.54788	3.55407	3.98538	4.45938	4.27201	3.64106	0.284979	0.300207	1.15368	1.07381	6.24104	5.61659	1.59039	5.04316	8.98945	8.51165	10.15	9.96809	3.02586	2.59252	2.69488	4.15066	5.58363	5.23878	28.0002	0.821486	-0.944348	2.82371	2.77658
cluster5	2.73256	2.63395	0.734558	0.731768	4.19634	4.05629	4.146	4.23902	3.4442	3.75633	5.08482	5.03783	3.71519	0.343966	0.346685	1.56743	1.47981	7.18488	6.75927	1.77945	5.644	10.357	9.81915	11.6995	11.199	3.92047	2.91151	3.20951	4.76659	6.62875	7.11398	28.143	0.619319	-0.570294	2.55998	2.52201
cluster5	2.70681	2.6219	0.739124	0.752338	4.30774	4.7216	4.13804	4.36934	3.63156	4.0056	5.39071	5.45546	4.16749	0.320794	0.345331	1.40007	1.41762	6.49451	6.259	1.70149	5.31168	9.73604	8.76179	10.3162	9.53441	3.74681	2.67554	3.03595	4.3967	6.47301	6.43967	29.0573	-1.03145	1.19616	2.50902	2.69576
cluster2	2.72408	2.29451	0.522968	0.48121	3.81321	4.21383	3.45174	3.84521	3.48016	3.95731	5.22526	5.41803	4.24445	0.293576	0.269951	1.15046	1.00217	5.76748	5.68549	1.77054	5.02223	8.44877	8.58578	11.1185	10.7212	3.37032	2.54874	2.72931	4.36269	5.97128	6.15315	28.1002	1.51521	-0.0279977	2.51003	2.24734
cluster4	2.55952	2.42222	0.634609	0.641862	3.14015	3.57336	3.13731	3.58495	3.53287	3.9473	4.64203	4.80791	3.88992	0.244135	0.287389	1.22203	1.28503	5.83903	5.47199	1.48546	5.93268	9.41027	8.87508	11.474	10.6552	3.43586	2.53868	2.99746	4.17183	6.13358	6.00895	28.0002	-0.363655	0.0451568	2.51009	2.32053
cluster3	2.85506	2.86573	0.624744	0.717164	3.84253	3.75282	3.78862	3.79538	3.18661	3.43127	5.85071	5.86769	4.59263	0.306705	0.32702	1.11638	1.33308	5.72894	5.87412	1.71988	5.21444	9.31184	8.88913	10.792	10.6258	3.60446	2.40582	3.13854	4.28298	6.09448	6.43706	29.0573	0.830916	0.123894	2.31669	2.01164
cluster4	2.63974	2.35029	0.595319	0.55719	3.86424	4.22117	4.30285	4.5642	3.55148	4.00622	5.08666	4.9978	3.93515	0.285378	0.29035	1.15201	1.06693	5.83447	5.46983	1.72503	4.19352	9.41876	8.33367	11.1193	9.88905	2.87418	2.48555	2.77456	4.37759	6.41711	5.77959	28.0145	-0.737534	0.617614	3.04845	2.07603
cluster2	2.34129	2.30232	0.556727	0.566015	3.67754	4.07317	3.54472	3.79377	3.17918	3.55315	4.69419	4.86709	3.79328	0.278797	0.277539	1.14316	1.16295	5.75036	5.59941	1.59288	4.9004	8.96052	8.28186	10.4583	9.75528	3.57089	2.3559	2.88916	3.80771	5.92971	6.07369	27.9431	-0.373085	0.0653702	2.49579	2.49394
cluster5	2.78372	2.57682	0.728996	0.702027	3.52195	4.18536	4.27841	4.70856	3.47145	3.93341	5.69925	5.71746	4.13448	0.31647	0.322084	1.52655	1.45319	6.11226	5.78853	1.82838	5.74835	10.1636	9.24541	11.2105	11.3764	3.66525	2.66852	2.99678	5.0293	7.73002	7.69679	26.9859	0.988435	-0.651439	2.67196	2.67642
cluster1	1.90676	1.98078	0.426905	0.401966	3.11115	3.45936	3.81286	3.97359	3.18209	3.68332	3.73599	3.82131	3.5506	0.243708	0.258218	0.833319	0.83687	5.28708	5.0492	1.75462	5.17152	9.04629	8.79763	11.8225	10.5068	3.08442	2.17629	2.51913	4.07413	6.27202	5.42839	24.9431	-0.580014	0.480962	2.94931	2.44777
cluster5	2.90467	2.67266	0.792496	0.765942	3.6398	4.12177	3.82316	4.48302	3.21529	3.67706	5.41293	5.54265	4.02463	0.316234	0.329816	1.51727	1.4671	6.04358	5.853	1.68719	5.68816	9.58452	9.55224	12.4643	10.5201	3.8022	2.74392	3.09029	4.6547	7.0249	7.04011	28.1002	-0.347154	0.00978336	2.31491	2.37017
cluster3	3.39455	3.1068	0.780906	0.816179	4.79292	4.97229	4.72673	5.04685	3.74943	3.92516	5.65879	5.71634	4.02645	0.332368	0.333547	1.50698	1.59619	6.56216	6.61608	1.95317	5.36938	9.38428	9.25955	11.3421	10.7394	3.65225	3.00736	3.50591	5.14919	6.61672	7.02151	26.9716	-0.36837	0.0552635	2.26428	2.79774
cluster3	2.96322	2.84053	0.720176	0.721157	4.26674	4.41415	4.1756	4.35586	4.07263	4.46802	6.73057	6.79002	4.65324	0.322442	0.339122	1.50778	1.40766	7.12469	6.9605	2.02225	7.26063	10.7732	10.6848	13.0815	12.6633	4.35497	2.83916	3.21409	4.60629	6.56852	6.78569	29.143	1.2213	0.0683864	1.97323	1.55476
cluster2	2.33095	2.26506	0.549888	0.556268	3.16695	3.11729	3.10262	3.32208	3.01477	3.27887	4.48378	4.5796	3.83724	0.228808	0.257845	1.05995	1.05015	5.21067	4.76357	1.27749	4.7598	7.93146	7.91476	10.1036	9.5449	2.95144	2.09847	2.55948	3.27175	5.25444	5.44688	27.1287	1.67042	-0.477085	2.21401	2.77924
cluster3	3.2565	3.14371	0.831376	0.824575	4.14641	4.2986	4.09054	4.29487	3.52948	4.14619	5.57022	5.57408	4.4668	0.323669	0.345995	1.47251	1.48695	6.81786	5.94907	1.65933	4.69386	9.89759	8.90671	11.5447	11.1089	3.49615	2.78635	3.24115	4.7645	7.00363	7.44179	26.2144	1.00734	-0.649534	2.24676	2.42537
cluster4	2.84025	2.47996	0.673423	0.637258	4.1786	4.16179	4.05485	4.22389	3.3032	3.6757	4.84901	4.63594	3.88363	0.286604	0.301796	1.35363	1.31077	6.38326	5.83869	1.51248	4.88335	8.87192	8.4764	10.3511	9.52362	3.3059	2.86696	3.09607	4.32921	6.26999	6.36813	23.9145	-0.885717	0.491069	3.07204	2.56432
cluster5	2.7787	2.61721	0.674561	0.691632	3.65349	3.82412	3.82989	3.78145	3.09126	3.53247	4.72473	4.83407	3.86548	0.285754	0.297382	1.24592	1.37338	5.82803	5.4489	1.55639	4.5333	8.22153	8.07324	9.5355	9.14567	3.14683	2.57134	3.05007	3.45131	5.92576	5.95755	28.9431	0.398198	-0.769412	3.07169	3.2583
cluster4	2.67332	2.47422	0.650814	0.626116	4.23465	4.44246	4.23704	4.14307	3.8686	4.04676	4.85198	4.88932	4.18206	0.310388	0.34902	1.35159	1.24568	6.57009	5.87742	2.07353	5.36484	9.61065	9.04055	12.0205	10.3754	3.663	2.65334	2.92605	4.22197	7.2007	7.02609	27.9431	-0.862191	1.52444	2.7859	2.39428
cluster4	2.59624	2.53182	0.593985	0.641276	3.95434	4.05223	3.68254	4.05749	3.52285	3.93425	5.10943	4.97216	4.18154	0.301834	0.306752	1.23685	1.24953	6.33468	6.08328	1.78129	5.12384	9.04315	8.98521	10.4447	10.5911	3.61156	2.5694	3.0525	4.06671	6.18386	7.12129	26.0002	-0.363655	0.0451568	2.36824	1.98541
cluster4	2.61779	2.49825	0.62811	0.64219	4.34636	4.37757	4.42902	4.46598	3.60222	4.10109	5.29781	5.13867	3.98713	0.325168	0.336232	1.29073	1.29867	6.71318	6.19473	1.73505	5.56888	9.65633	9.23974	10.8471	11.0439	3.70375	2.53391	2.9453	4.97912	6.16421	6.16199	23.1002	-1.72229	-0.161131	2.62668	3.05251
cluster2	2.581	2.30267	0.640069	0.566454	3.82125	3.93593	3.95105	4.4805	3.57298	3.98119	4.82512	4.62345	3.75726	0.283286	0.299778	1.24529	1.10898	5.93728	5.50406	1.70272	5.55432	9.51878	8.12506	10.8537	9.59675	3.55583	2.46382	2.68788	4.36987	6.25057	6.49709	23.9716	-0.36837	0.0552635	2.32752	2.08998
cluster4	2.48625	2.33857	0.625945	0.609713	4.21453	4.23829	3.98428	4.06679	3.45129	3.87684	5.29816	5.35314	4.15702	0.289998	0.319162	1.19953	1.14946	6.18725	5.90352	1.89287	5.22534	8.81195	8.57622	10.205	8.87902	3.63144	2.40741	2.71779	4.41017	6.59175	5.53994	26.0573	-0.899767	0.0951083	2.45586	2.31809
cluster5	2.89975	2.71828	0.742166	0.789406	4.19349	5.02252	4.64596	4.89354	3.68251	4.1837	6.12901	6.29828	4.50902	0.336795	0.334344	1.45586	1.55135	6.7146	6.59587	2.08755	5.40663	10.0977	9.70136	12.7766	12.0967	3.95605	2.92397	3.29513	5.13987	7.27333	7.20539	27.2144	-0.666907	1.84222	2.05722	2.71442
cluster5	2.85669	2.68634	0.754034	0.803993	4.16414	4.47717	3.76951	4.32276	3.38183	3.73353	5.59991	5.45642	4.01253	0.314043	0.319733	1.55207	1.61991	6.64074	6.89577	1.89954	6.04284	10.1776	10.5246	12.6643	12.2924	4.08333	2.95523	3.45991	4.59628	7.58304	7.64802	27.0573	1.39527	-0.66771	2.10783	2.49399
cluster4	2.52758	2.34262	0.554018	0.616799	3.498	3.57788	3.37477	3.54604	3.61546	3.99845	3.90089	3.81085	3.59795	0.281819	0.285118	1.10944	1.1261	5.46427	4.81517	1.5667	4.97686	7.88771	7.34099	8.85358	8.49598	3.3417	2.53729	2.86243	3.9971	5.67147	5.62272	27.786	-0.399016	0.120957	4.35083	2.82127
cluster4	2.49852	2.34731	0.666883	0.667986	4.44	4.47869	4.6002	4.73485	3.59806	4.03134	4.66155	4.74372	3.75974	0.314457	0.303958	1.3112	1.33877	5.93096	6.17409	1.82624	6.12856	9.69891	9.60205	12.071	11.7678	3.90401	2.52199	2.80513	4.77343	6.97066	6.44356	25.0288	-0.358941	0.0350501	2.74628	2.2117
cluster4	2.54129	2.55622	0.555428	0.638581	4.27791	4.79663	3.67022	4.26936	3.41427	3.96451	5.25729	5.65766	4.221	0.326409	0.305192	1.09402	1.2256	5.87491	6.3291	1.72164	4.75901	8.89493	9.23303	10.4705	10.5767	3.3783	2.41431	2.8585	4.71447	5.82515	6.23784	24.0716	-0.0508803	0.741329	2.35737	1.75511
cluster2	2.16909	2.1085	0.427815	0.427207	3.32711	3.39622	3.2887	3.75	3.36941	3.57683	4.46168	4.432	3.74608	0.256507	0.257576	0.920198	0.833672	5.21913	5.08028	1.50424	4.22537	7.73121	7.89548	9.30476	8.87205	2.95866	2.37225	2.68669	3.85811	6.10125	5.85086	26.9573	-1.17963	-0.342681	3.68329	2.95252
cluster2	2.55382	2.12547	0.609425	0.452465	4.12446	4.18125	3.87438	4.17022	3.24626	3.5351	4.23169	3.84995	3.77367	0.236254	0.242124	1.01174	0.751833	4.1052	4.14852	1.3107	3.88514	6.88759	6.58324	7.9273	7.79737	2.65692	2.13537	2.22797	4.07972	5.31442	4.56777	24.8574	1.04247	-0.611356	3.98881	2.7268
cluster4	2.63515	2.43603	0.628511	0.585155	3.70357	4.03639	3.86479	4.38843	3.56316	3.82682	4.87553	4.91922	3.87449	0.295918	0.280156	1.23923	1.13431	5.58865	5.40233	1.60826	5.6454	9.14137	8.70945	10.8954	9.45172	3.49219	2.46274	2.67098	4.53508	6.66439	6.10375	27.0288	-0.358941	0.0350501	2.91338	1.53984
cluster4	2.51049	2.40893	0.586191	0.608675	3.62279	3.94402	4.14283	4.09668	3.22686	4.00298	4.9699	5.47151	4.29753	0.307337	0.310568	1.1483	1.15213	5.42069	5.82091	1.6156	4.38102	7.2651	8.16001	8.26989	9.03146	3.22522	2.40013	2.78505	4.14092	5.84725	6.62797	24.1859	-0.389445	1.38456	2.6015	2.32768
cluster1	2.04471	2.01314	0.348359	0.370204	3.19672	3.55678	3.81364	3.71983	2.98041	3.64261	3.12112	3.36021	3.2907	0.2137	0.221076	0.697877	0.800244	4.52253	4.6728	1.20057	4.88724	7.32369	7.2142	8.63293	8.60866	3.23142	2.13115	2.6736	3.66056	4.78739	5.04978	26.8288	-0.0909555	0.8992	3.1824	2.5073
cluster4	2.45204	2.36276	0.609204	0.578041	3.93681	4.17843	3.70975	4.24704	3.78724	3.94945	4.46895	4.66011	3.85779	0.289924	0.279116	1.24697	1.17043	6.13177	5.90154	1.59326	5.59846	8.69685	8.36786	10.6674	10.5376	3.75137	2.65548	2.9752	4.01577	6.72757	6.45453	27.9573	-1.16082	1.32149	2.58318	2.07578
cluster4	2.64682	2.40749	0.60969	0.58557	3.78555	4.1048	4.06029	4.49303	3.52031	3.98925	5.09104	5.12219	4.10865	0.321874	0.326191	1.21401	1.20226	5.53459	5.98196	1.75558	5.4706	8.72533	9.19731	10.8317	11.0806	3.71102	2.4711	2.72717	4.43956	6.43393	6.30011	26.0716	-1.0479	1.42499	2.33309	2.22232
cluster4	2.67784	2.41048	0.659559	0.609695	3.20829	3.43423	3.42065	3.52569	3.37151	3.78623	4.79434	4.76812	3.64968	0.275067	0.293385	1.24854	1.18863	5.52526	5.32794	1.5107	5.7975	8.17333	8.42196	9.85871	9.48771	3.45214	2.59438	2.85761	3.53668	5.80074	5.74241	26.786	-0.22971	-0.425969	3.18695	2.69687
cluster3	3.56928	3.35853	0.880203	0.871071	4.47816	4.8186	4.28723	4.49175	3.64841	4.29356	6.37142	6.39742	4.93394	0.35084	0.34658	1.66119	1.66027	7.13588	7.01148	1.82989	5.3689	10.4759	10.1967	13.8876	12.9277	3.96158	3.06481	3.51636	4.65683	7.60878	7.92257	27.143	0.261895	0.185328	1.91119	1.76695
cluster5	2.91929	2.67691	0.741968	0.762371	4.18026	4.67413	3.92157	4.23508	3.68081	4.20743	5.89918	5.89652	4.49431	0.307771	0.315511	1.42927	1.43552	5.87625	5.64781	1.7043	5.87298	9.13712	9.25591	10.9365	11.299	3.62904	2.73306	3.0308	4.57739	6.81585	6.70945	22.9573	-0.577657	-0.376864	2.98028	2.23915
cluster4	2.46314	2.34848	0.654301	0.642219	4.21778	4.51983	4.22752	4.12777	3.08392	3.73514	4.51637	4.70721	3.87272	0.280017	0.296099	1.32524	1.28316	6.84733	6.7052	1.61456	5.60613	9.33632	9.11575	10.7073	10.331	3.8841	2.61692	2.93625	4.2147	6.25643	6.51007	28.0002	-0.739891	0.928515	2.32471	2.58245
cluster5	2.95535	2.78772	0.651968	0.662025	3.76758	4.02348	3.24433	3.46727	3.74333	4.09696	5.24185	5.1685	3.92091	0.292306	0.290611	1.21181	1.27052	5.59494	5.43571	1.63396	4.14441	8.46315	8.47084	9.95083	9.71349	2.91479	2.72603	3.0366	4.07693	5.92323	6.73087	27.9145	0.99546	-0.255557	3.07972	2.73837
cluster4	2.48556	2.51757	0.716044	0.67846	3.94294	3.8799	3.94877	3.78779	3.47848	3.82439	4.4159	4.44608	3.88368	0.296875	0.311411	1.4136	1.37072	5.61515	5.488	1.4274	4.53187	8.11928	8.13537	10.3076	10.6819	3.06173	2.39214	2.93869	4.17943	6.63001	7.3877	24.8716	-0.140319	2.28734	2.83172	2.1782
cluster5	2.99424	2.76099	0.705374	0.681011	4.35966	4.30765	4.06313	4.01536	3.49595	4.06511	4.75258	4.60301	4.17773	0.320972	0.322749	1.29562	1.22437	6.43924	6.16847	1.67074	4.55044	8.99708	9.33334	11.8345	11.3412	3.36161	2.84644	3.30837	4.01775	6.90403	7.07464	25.786	-0.399016	0.120957	3.85907	3.87389
cluster5	2.85755	2.62135	0.554127	0.540195	3.88616	3.7151	3.92112	3.7118	2.98277	3.54218	4.03474	4.23728	3.62964	0.291528	0.286514	1.01394	1.03268	5.44815	5.42489	1.28816	4.45805	8.19059	7.77562	10.0426	9.99807	2.76759	2.5675	2.90413	3.80726	5.29483	5.58994	28.8859	-0.382514	0.0855836	4.13689	3.26224
cluster4	2.72257	2.51406	0.684476	0.703861	3.60954	3.364	4.03708	4.22181	3.33228	3.55761	4.7412	4.73424	4.08022	0.315929	0.313165	1.40104	1.39143	6.23747	5.82186	1.61826	5.03822	9.36742	8.84207	12.2246	10.0189	3.27189	2.56478	2.84688	4.09527	6.65919	6.78955	23.0859	-0.349511	0.0148367	2.56278	2.44008
cluster2	2.31827	2.24888	0.513888	0.546175	3.28789	3.16356	3.8749	3.72137	3.45116	4.20408	3.81013	4.02897	3.48057	0.286043	0.256779	0.958825	1.11264	5.41522	5.20799	1.50413	4.62944	7.07867	7.84005	9.05296	9.73103	3.46304	2.41798	2.69382	3.94093	5.9584	6.39724	25.8574	-0.387229	0.0956903	3.28108	3.30003
cluster1	1.85463	1.99132	0.473968	0.467597	3.19568	3.68595	3.58335	3.66403	3.03452	3.57508	3.68627	3.72436	3.73097	0.231391	0.222454	0.942695	0.962157	4.83478	4.3203	1.20667	4.0445	7.04456	7.38363	7.82532	7.84464	2.47187	1.98698	2.36733	3.79484	5.4533	5.73231	24.8716	-0.855166	0.315524	3.45657	2.97871
cluster2	2.30323	2.18579	0.420862	0.473748	3.27764	3.39599	3.83554	3.84405	3.02894	3.71728	4.17487	4.26087	4.04279	0.256072	0.244054	0.649708	0.891975	4.83978	4.81942	1.43111	4.17207	7.27248	7.92489	9.32354	9.63261	2.8571	2.05833	2.54135	4.1739	4.92274	6.00106	22.8288	-0.391944	0.105797	3.22287	2.93834
cluster5	2.7891	2.57719	0.644819	0.65874	3.15932	3.41556	3.47066	3.76433	3.6455	4.06357	3.58091	3.58464	3.56523	0.267921	0.274322	1.33321	1.35778	5.85859	5.86614	1.46886	5.13114	9.00496	8.70423	10.6039	10.0438	3.16779	2.73082	3.19134	3.95541	6.64793	7.10637	26.8859	0.144215	-0.704221	2.71167	3.055
cluster2	2.19968	2.12999	0.463158	0.50579	3.66737	3.98874	3.77858	4.01659	2.90742	3.39172	3.67416	3.68727	3.64828	0.231724	0.220558	0.823475	0.922535	4.36374	4.24994	1.49504	4.84014	6.91536	6.81511	8.64782	8.22575	3.04368	2.04592	2.47568	4.1752	5.32447	5.55893	22.8431	-0.389586	0.100744	3.1516	2.48065
cluster4	2.76416	2.40384	0.784022	0.751725	4.2203	4.01573	3.43641	3.84285	3.41176	3.7335	4.46745	4.24863	3.57354	0.310124	0.281001	1.49378	1.46409	6.31685	6.03039	1.59727	5.45446	9.70669	9.07129	12.0201	11.548	3.50705	2.59602	2.85446	4.07762	7.33566	6.92548	28.8859	-0.382514	0.0855836	2.73731	3.12577
cluster5	2.80346	2.6313	0.682147	0.702134	3.89316	3.89394	3.92475	4.09399	3.91337	4.20405	4.90377	4.98434	4.13895	0.298925	0.317329	1.36049	1.38553	6.73009	6.29976	1.82773	5.42303	9.43516	9.39475	10.7556	10.7659	3.86826	2.78808	3.18908	4.5141	6.47896	6.77275	22.9002	-0.699957	0.658041	2.30584	2.18605
cluster4	2.75725	2.51447	0.693451	0.682649	3.4491	3.66157	3.50465	3.94794	3.73653	4.03912	5.02502	5.03338	3.91149	0.263158	0.304253	1.39931	1.377	6.51247	5.95708	1.51401	6.19886	10.2486	9.06579	12.3953	11.6008	3.79704	2.71365	3.05599	3.91266	7.11238	6.98031	26.9573	0.795602	-0.0386336	2.46887	2.3153
cluster4	2.3287	2.52464	0.520266	0.617001	4.08258	4.35016	3.8431	4.22511	3.46397	3.92461	3.96683	3.98497	3.39874	0.258163	0.251304	0.971894	1.19663	5.55707	5.70711	1.4293	5.41666	7.83916	8.30208	9.75988	10.1179	3.31218	2.34951	2.92517	4.35317	6.15863	6.27797	23.9002	-0.380157	0.0805303	2.71442	3.62704
cluster2	2.52809	2.24663	0.543654	0.600866	3.4862	3.67341	3.60942	3.79851	3.50341	4.05465	4.21012	4.13435	3.88343	0.29422	0.277679	1.16597	1.28895	6.17215	5.51306	1.52542	4.65736	8.84744	8.40157	9.95297	9.2266	2.82684	2.66242	2.9844	4.29119	5.89722	6.28498	26.8145	-0.789348	0.45088	2.99323	2.29766
cluster5	2.78349	2.63497	0.646424	0.642884	3.49486	3.73397	3.70445	3.8638	3.51256	3.83745	4.14677	4.04937	3.8137	0.303998	0.323913	1.34883	1.27422	6.39011	6.09662	1.5875	5.24057	9.16651	8.86241	11.0024	11.2834	3.66169	2.80481	3.13329	3.8724	6.45398	6.2223	27.0002	1.23535	-0.276882	3.65788	2.59805
cluster4	2.69654	2.53874	0.723723	0.682215	3.74194	4.54855	3.74227	3.99243	3.58918	3.73073	5.65552	5.71721	4.60132	0.332144	0.323294	1.33847	1.25641	6.65832	6.0893	1.69654	5.46405	9.68914	9.12077	11.7645	10.9925	3.278	2.68159	2.91233	4.57355	6.93051	6.59737	26.0859	-0.725747	1.59984	2.20299	2.8437
cluster2	2.17557	2.23508	0.452997	0.523029	4.02839	4.02448	3.5775	3.84312	3.58408	3.91836	5.14744	5.21898	4.5196	0.302727	0.286148	0.989534	1.12774	5.45376	5.47219	1.70093	5.36684	7.90291	8.19156	9.44326	10.4621	3.71746	2.3177	2.77215	3.89682	5.31963	5.96576	23.9002	-0.737581	0.150695	2.69882	2.01179
cluster3	2.80028	2.92435	0.718883	0.856098	3.61564	4.23905	3.72827	4.08951	3.38094	4.15284	5.44049	5.68665	4.41674	0.292612	0.308928	1.41088	1.60994	6.545	6.02545	1.72833	5.34514	9.41211	8.6394	10.4719	10.1483	3.66404	2.62201	3.16348	4.57192	6.45178	6.76136	28.0859	1.81384	-0.337787	2.34744	1.90664
cluster4	2.62356	2.35995	0.6381	0.595631	3.62664	4.18438	3.46596	3.85263	3.40461	3.80939	5.81407	5.744	4.58505	0.290235	0.316666	1.28805	1.05404	6.31181	5.30693	1.56511	5.9399	8.90036	7.59399	10.2767	9.82677	3.91938	2.65269	2.75239	4.01949	6.32813	5.63701	26.9716	-0.387182	0.776702	2.26484	2.21477
cluster4	2.49388	2.36427	0.6606	0.654615	3.83048	3.62799	4.01552	3.85603	3.67375	3.9063	4.40771	4.42533	3.68322	0.290464	0.310645	1.22424	1.19144	6.20878	5.64177	1.60791	5.19777	8.98073	8.39165	10.8955	10.3332	3.72063	2.67537	3.06431	3.61053	6.12381	5.9141	27.9002	0.033702	-0.15875	2.68844	2.28992
cluster3	3.22663	3.06095	0.790681	0.814391	4.0497	4.50122	3.23763	4.12458	3.71185	4.06404	6.24751	6.41494	5.07465	0.318994	0.333521	1.39868	1.44176	6.72722	6.6581	1.8623	4.99772	9.91922	9.66162	11.9635	11.6089	3.74263	2.74414	3.1851	4.92827	6.36442	6.96967	29.0573	0.718045	-0.851218	2.12559	1.81403
cluster5	3.10942	2.82146	0.682683	0.686449	3.7517	3.84929	3.85188	3.9193	4.0522	4.37128	5.53431	5.33636	4.34325	0.299978	0.318273	1.29252	1.25203	5.80632	5.24337	1.70887	5.29745	9.20224	8.20911	11.3036	10.7382	3.44518	2.76704	3.09989	4.44634	6.19366	6.11975	25.0145	-1.50317	0.581632	2.66832	2.07118
cluster4	2.55754	2.48061	0.656498	0.625688	4.01844	4.1878	3.75851	4.00238	3.80848	3.83154	4.5444	4.63666	3.85105	0.317206	0.320991	1.27259	1.20718	6.05664	6.02742	1.70377	5.80487	8.7834	8.48961	10.5271	10.0834	3.35692	2.59874	2.83174	4.54468	6.85129	6.67744	24.0145	-0.304863	0.527659	2.32365	2.52816
cluster4	2.9244	2.56401	0.589331	0.610669	3.60858	3.99923	3.80546	3.61081	3.10674	3.56102	4.79045	4.87675	4.31277	0.294905	0.295485	1.09895	1.07451	5.04499	5.38685	1.57767	4.80827	7.30411	7.94132	7.91231	9.13228	3.20878	2.44616	2.82218	3.79706	5.64779	5.9266	25.9288	-0.525936	2.98676	3.25842	2.28859
cluster4	2.63598	2.55424	0.610665	0.669009	4.00795	3.9873	4.03147	3.83088	3.18969	3.5961	4.50986	4.57815	3.97354	0.317742	0.310762	1.26078	1.34506	5.57814	5.07097	1.44012	4.55434	7.93336	7.64187	9.63472	8.87082	2.97517	2.35398	2.78537	3.56079	5.96045	6.30548	25.8574	-1.49712	0.763156	2.90594	2.84051
cluster4	2.78097	2.38023	0.704532	0.638294	3.75391	4.10147	3.61639	3.9707	3.59665	3.80155	4.31759	4.2494	3.75214	0.299267	0.29503	1.25303	1.15144	5.49499	4.71915	1.66208	4.98534	8.45284	7.90091	10.9124	10.326	3.39879	2.43309	2.54228	4.23276	6.11844	6.01962	29.0002	-0.363655	0.0451568	2.49898	2.23487
cluster4	2.74997	2.5092	0.621312	0.618823	3.84194	4.13656	3.66723	4.08592	3.72838	4.0641	4.66563	4.65761	3.66648	0.29753	0.303471	1.16992	1.1711	5.8692	5.98387	1.66364	5.00649	9.30415	9.25379	11.9115	11.091	3.48216	2.53687	2.92266	4.34659	6.78415	6.90685	29.1145	0.802722	-0.61416	2.13476	1.55362
cluster4	2.75125	2.52327	0.657499	0.656337	4.05313	3.83954	4.06708	4.26527	3.46324	3.4967	4.82409	4.96479	3.92026	0.312678	0.305278	1.2878	1.34362	6.22578	5.80508	1.58586	4.39003	8.64117	8.61315	10.4379	10.0004	2.74215	2.54811	2.90341	4.32994	6.39597	6.69578	28.143	-0.772753	0.273484	2.46179	2.03054
cluster5	2.71174	2.64719	0.692694	0.714205	3.58774	4.15633	4.09159	4.4527	3.45841	4.0901	5.48467	5.31278	4.41242	0.311139	0.317208	1.33641	1.39169	5.86297	5.63159	1.74151	5.02661	8.74466	8.77486	10.7456	10.5776	3.27695	2.88601	3.37237	4.50401	6.51444	6.78367	28.0859	-0.349511	0.0148367	2.57976	2.61069
cluster4	2.57253	2.42081	0.598251	0.597862	3.84583	4.18816	3.95011	4.02582	3.66598	4.07183	4.94104	4.8925	3.94182	0.267273	0.290097	1.15021	1.22617	5.77488	5.11993	1.51282	5.3473	8.84737	8.07371	10.9061	10.1329	3.48517	2.56465	3.01003	3.63583	6.38262	6.5598	25.8431	-0.389586	0.100744	2.30994	2.72753
cluster3	3.09711	2.96631	0.733582	0.732093	4.70636	4.53477	4.35164	4.38212	4.22658	4.44495	5.87125	5.83487	4.29499	0.354337	0.339144	1.49949	1.46787	6.36491	6.44313	1.89032	5.89581	9.94634	9.67278	12.146	11.0247	3.93259	2.96877	3.29746	5.33483	7.58619	7.5508	28.1002	-0.930319	0.00978336	2.46001	2.18642
cluster2	2.53693	2.24419	0.674444	0.644705	3.55814	4.39999	3.70491	4.00359	3.34439	4.05679	3.78401	3.88006	3.49314	0.265874	0.262234	1.18122	1.1458	5.54604	5.47803	1.37908	4.87786	8.40198	8.15674	9.74666	8.34439	3.41888	2.47496	2.72766	4.29448	6.1314	6.10602	24.8002	0.468683	-0.762057	3.45983	2.08799
cluster5	2.84559	2.67741	0.704764	0.692034	3.81044	4.33216	3.82482	3.76356	3.66831	3.98825	5.01231	5.24607	4.12356	0.28323	0.297767	1.42228	1.29039	6.18022	5.67937	1.42402	5.24711	9.23483	8.34398	10.323	9.60056	3.37363	2.90577	3.18535	4.34226	6.33872	5.33116	25.0145	2.55453	-0.310721	2.44255	2.0639
cluster3	2.86005	2.84214	0.724765	0.751251	4.41529	4.21569	4.18613	4.09197	3.48063	3.98348	4.58043	4.8208	3.95811	0.306456	0.284288	1.31127	1.3812	6.05811	6.05407	1.64311	5.02683	8.47459	8.22761	11.0571	10.0773	3.22443	2.68435	3.14679	4.34875	6.2555	6.26199	27.9431	0.906116	-0.675859	2.83192	2.15299
cluster4	2.61279	2.52696	0.669428	0.648958	3.55789	3.45258	3.71227	3.60522	3.30944	3.69988	4.62797	5.04001	4.01691	0.280238	0.275039	1.30245	1.32662	5.64574	5.55974	1.44136	5.06095	8.26847	8.07781	9.76315	9.5133	3.40118	2.58441	3.05357	4.00668	5.95582	6.58895	26.9288	0.433464	-0.719381	3.06346	2.69257
cluster5	2.84402	2.71218	0.708329	0.699727	4.30041	4.23152	4.13951	3.78118	3.65071	4.25363	5.41456	5.55936	4.00962	0.287393	0.301036	1.31555	1.27912	6.34553	5.30264	1.572	5.16007	8.57212	7.54698	10.2291	9.54493	3.4916	2.51054	2.93978	4.30744	6.9459	6.92061	28.0288	-0.904482	0.250942	2.24878	2.03838
cluster5	2.68389	2.65328	0.642315	0.683812	4.72391	5.03114	4.54867	4.99528	3.72324	4.28525	4.72377	4.95154	3.90654	0.296539	0.285909	1.28498	1.34588	5.66917	5.67732	1.74036	5.62383	9.38124	8.77263	12.1787	11.0436	3.76826	2.62408	2.92838	4.83184	6.63647	6.44949	27.0573	-0.354226	0.0249434	2.38174	2.01652
cluster4	2.78269	2.53161	0.655502	0.655867	3.80025	3.93181	3.57369	3.69391	3.52436	4.08999	5.94742	5.9592	4.64279	0.32048	0.325125	1.32048	1.30578	6.00285	6.07394	1.85723	5.13054	9.17551	8.99108	11.2229	11.0532	3.58204	2.67224	3.02973	3.72392	6.84804	6.85154	25.0145	-1.1702	0.977434	2.22919	2.19326
cluster2	2.538	2.33149	0.541578	0.575119	3.73846	4.30549	4.27099	4.34551	3.53494	3.79431	5.0644	4.93868	4.4031	0.299471	0.300298	1.11597	1.1565	5.13087	5.35533	1.67721	4.70374	6.84481	7.31434	9.36434	9.53299	2.97324	2.29875	2.82619	4.37061	5.93906	6.6796	23.9145	-0.3778	0.0754769	2.47477	2.63207
cluster5	3.05377	2.77978	0.763993	0.743194	4.11228	3.82114	3.60578	3.86852	3.66506	3.78067	5.20972	5.25097	4.03146	0.335026	0.343069	1.31728	1.35169	5.83759	5.59959	1.7613	5.30703	9.23987	9.26025	11.2123	11.5053	3.53391	2.65676	3.0953	4.52791	7.26607	6.69856	28.043	1.14836	-0.529523	2.24204	2.00874
cluster4	2.77979	2.51917	0.694369	0.677384	3.49562	3.89866	3.28979	3.93307	3.59381	3.64223	4.93616	4.78057	4.02031	0.35205	0.340515	1.41878	1.32566	6.94388	6.34897	1.55664	5.52024	9.99542	9.19649	11.2793	11.0869	3.93254	2.78152	3.15875	3.89583	6.24932	6.48167	27.9431	0.417009	-0.751421	2.54865	2.07412
cluster4	2.88454	2.4843	0.694925	0.642077	3.45777	3.99823	3.84222	4.54294	3.7682	3.92575	5.33525	5.20195	4.65452	0.308637	0.32334	1.39079	1.20441	5.79975	5.40996	1.61472	5.30915	8.61594	8.09429	11.1687	10.393	3.5566	2.71388	2.82044	4.52705	6.45848	6.76835	27.9573	0.438179	0.166464	2.76251	2.26094
cluster1	2.47057	1.7758	0.649791	0.59148	3.7166	3.79815	3.82761	4.40005	3.3379	3.80508	3.9952	3.73325	3.50312	0.286179	0.278099	1.10479	1.05993	5.12186	4.65455	1.46754	3.96605	8.15069	8.62125	9.66776	9.99578	2.56092	2.28626	2.41351	4.09631	5.77057	5.99237	24.8574	-0.387229	0.0956903	3.42402	2.33625
cluster5	2.89408	2.78094	0.77607	0.789847	3.66659	3.66351	3.93788	3.94939	3.55879	3.99837	4.71176	4.83935	4.01691	0.319342	0.303238	1.44907	1.49331	5.9889	5.75334	1.73248	5.16254	9.23761	9.50776	11.0988	11.5227	3.338	2.54591	3.01509	4.36876	7.09631	7.26509	27.9716	-0.36837	0.0552635	3.11531	2.92384
cluster4	2.71644	2.49147	0.700925	0.645943	4.07752	4.46458	4.23777	4.61041	3.52736	3.99236	4.32547	4.30157	3.13506	0.288325	0.293987	1.38394	1.26754	5.87572	6.18744	1.7351	5.44278	8.5708	8.31964	10.8109	9.74829	3.56374	2.60838	2.94534	4.38585	6.59098	6.36559	22.9288	0.264158	0.108205	2.86033	2.48917
cluster3	3.08547	2.98089	0.74116	0.795476	3.96826	4.39895	3.75933	4.32939	3.43519	3.67665	6.62662	6.8505	4.44263	0.367916	0.356189	1.23169	1.37622	6.32385	6.14322	1.88381	5.30596	9.62442	8.82293	11.0241	10.6888	3.41458	2.59832	3.06919	5.06159	5.34748	6.43081	28.1002	0.631058	-0.760231	1.98572	1.68632
cluster3	3.21241	3.04756	0.824077	0.797386	4.47626	4.47332	4.10943	4.26065	3.94605	4.22278	6.05928	6.22842	4.42965	0.328956	0.330116	1.53505	1.53928	6.43463	6.45094	1.81965	6.01156	10.0023	10.1585	13.0555	12.4534	4.08793	2.89487	3.23233	5.10518	7.38428	7.3543	28.1859	0.0620375	-0.776158	2.41237	2.33063
cluster5	2.79994	2.69633	0.696081	0.683427	4.2619	4.09094	4.4719	4.46119	3.33074	3.96776	5.06734	5.03828	3.99541	0.296365	0.323765	1.40528	1.35733	7.11753	6.51391	1.93757	5.14792	9.61468	9.76308	11.0842	11.3212	3.86157	2.73589	3.11014	4.4795	7.10405	7.22706	28.8859	-0.382514	0.0855836	2.7997	2.97744
cluster4	2.7358	2.5456	0.622543	0.628088	3.32215	3.93762	3.8104	4.16144	3.48694	3.89634	4.47249	4.66034	4.23514	0.295274	0.302035	1.34068	1.26892	6.18986	5.67681	1.73379	5.43759	9.33985	8.64837	10.96	10.4295	3.28344	2.85793	3.12591	4.04516	6.85413	7.25825	26.8145	-0.394301	0.11085	2.84258	2.14461
cluster1	2.07394	2.02321	0.388271	0.406603	3.65788	3.70872	3.79654	3.79879	3.44695	3.81237	4.95596	4.88598	4.00464	0.282272	0.266808	0.744766	0.841716	5.40258	5.30822	1.53809	4.95765	8.71881	7.69684	10.3557	9.45283	3.54816	2.23592	2.58843	4.26268	5.55295	5.45587	27.9002	-0.756392	-0.133563	3.26801	2.2188
cluster2	2.52727	2.36009	0.44003	0.492402	3.02039	3.60835	3.23124	3.94081	3.55905	3.94663	3.85808	3.8927	3.81312	0.273804	0.274176	0.870954	0.974218	4.80001	4.94289	1.64516	4.64613	7.42707	7.12281	9.31152	9.66938	2.91334	2.51309	2.95066	3.75921	5.54346	6.92506	27.786	-0.399016	0.120957	3.3185	2.31972
cluster5	2.65905	2.5726	0.699994	0.702984	3.7165	4.09966	4.04354	3.95107	3.51803	4.30811	4.69731	5.05445	4.11979	0.295573	0.292266	1.36545	1.44353	6.37973	5.98778	1.76665	5.24518	9.24296	8.96218	12.131	12.461	3.52161	2.67168	3.23377	4.01878	7.31284	7.50655	22.9716	-0.405994	-0.000508546	2.69151	2.3835
cluster3	3.41772	3.03185	0.855634	0.811156	4.85194	4.84706	4.10862	4.10349	3.61883	4.07499	5.989	6.30506	4.18844	0.342279	0.34683	1.61614	1.58589	7.07491	7.07158	1.8032	5.67556	10.5567	10.377	12.7809	11.9158	3.9319	3.19502	3.4313	5.0898	8.6148	7.78766	25.143	0.544071	-0.672842	1.96251	2.67506
cluster5	2.91726	2.73802	0.725604	0.743039	3.27122	3.83887	3.6095	3.92017	3.37422	3.93729	4.48989	4.71528	4.12273	0.309663	0.305816	1.3975	1.39764	6.12314	5.8844	1.58897	4.84122	9.10883	9.44034	11.3682	11.4694	3.32333	2.77668	3.12849	3.73466	6.98125	7.38541	26.8431	-0.389586	0.100744	3.4128	3.07991
cluster4	2.80459	2.44166	0.672148	0.622122	4.1522	4.02757	3.9426	4.01608	3.43579	3.61888	5.52981	5.20715	4.21586	0.32102	0.32407	1.39343	1.27869	6.62548	5.97414	1.66236	5.47072	9.9525	9.77289	11.6651	11.6302	3.56368	2.74286	3.04008	4.61325	6.89842	6.85132	27.0288	-0.791611	1.85394	2.5317	1.82378
cluster4	2.74597	2.46548	0.658369	0.658204	3.81772	4.39711	4.07178	4.10072	3.97023	4.07358	5.13943	4.89133	4.0489	0.284787	0.29446	1.29989	1.24382	6.05042	5.68547	1.87945	5.08859	9.07621	8.46981	10.7843	9.91022	3.30478	2.70946	2.96365	4.28543	6.4174	6.93584	28.9002	-0.737581	-0.147955	2.78734	2.54182
cluster2	2.57858	2.31751	0.597381	0.58432	4.2582	4.14289	4.27124	4.33519	3.20158	3.71216	4.39863	4.55338	3.90126	0.279671	0.267928	1.11098	1.2904	6.15117	5.91643	1.43161	5.02314	9.41009	9.49885	10.1555	10.1924	3.08856	2.47412	3.01675	4.75503	6.7753	6.3515	26.8431	-0.389586	0.100744	2.75274	2.28068
cluster1	2.2657	2.07967	0.476685	0.421508	3.6907	3.7297	3.87187	4.00692	3.10543	3.43943	3.59318	3.83422	3.97952	0.212345	0.212402	0.842996	0.817818	5.20822	4.95704	1.26957	3.91849	7.31248	7.5027	7.31649	7.87458	2.62039	2.23187	2.63519	4.46036	4.95504	5.06928	22.7574	-1.61897	0.404527	4.2984	2.53133
cluster1	1.90378	2.06	0.468575	0.538053	3.65713	3.73418	3.59509	3.81016	3.1811	3.5728	3.87448	4.05142	3.49546	0.261373	0.259967	0.864609	1.0551	4.8147	4.98	1.69795	3.92333	7.48673	8.08717	9.37894	8.44605	2.39507	2.10982	2.64145	3.3075	5.69703	6.0032	25.8431	-0.389586	0.100744	3.64608	2.5855
cluster2	2.5207	2.30381	0.576632	0.556268	3.29566	3.59087	4.04216	4.39518	3.40867	3.36663	4.20263	4.18341	3.54288	0.276278	0.285063	1.12959	1.03881	5.39185	4.73968	1.46407	4.75853	7.55594	6.98595	10.3778	8.85545	3.09115	2.37327	2.5576	4.50769	6.01791	5.74884	22.8002	-1.14913	1.17917	3.08403	2.58866
cluster5	2.76901	2.58033	0.65784	0.637021	3.56744	3.9637	3.39102	3.98815	3.41988	3.73087	4.84299	5.15005	4.07035	0.282014	0.291086	1.16526	1.17168	5.48867	5.09324	1.62011	4.98831	8.47096	8.40132	9.77386	9.79774	2.92853	2.50109	2.80836	4.17784	6.33074	6.33297	26.8716	-0.384872	0.090637	2.42946	2.07988
cluster2	2.21426	2.14948	0.562916	0.564815	3.55826	3.43163	3.47159	3.74726	3.18216	3.59791	4.21497	4.13255	3.79783	0.260328	0.242287	1.07774	1.09218	5.43034	4.92692	1.194	4.54937	7.58525	7.40692	8.06137	7.83717	2.91472	2.20428	2.58047	3.72428	5.49835	5.61213	24.9145	-1.74918	0.212208	3.65156	3.1305
cluster4	2.70264	2.5128	0.708418	0.714356	4.05216	4.14035	3.93996	4.16018	3.50891	3.99517	5.3965	5.54074	4.52804	0.338293	0.340655	1.32757	1.29315	6.52883	6.26442	1.68821	5.21779	9.99322	9.91694	12.6631	12.3926	3.61897	2.54144	2.78995	4.59185	6.72331	7.06177	26.1716	-0.335367	-0.0154834	2.76946	2.50921
cluster1	2.05961	1.96916	0.353184	0.39429	3.63606	3.76735	3.35332	3.60972	3.13863	3.88173	3.71182	4.01014	3.94096	0.234692	0.234987	0.7114	0.81793	5.18952	4.85733	1.54913	4.98559	7.66054	8.13355	9.92698	9.9727	3.12982	2.07239	2.48991	4.12523	5.07667	5.57741	27.9716	-0.36837	0.0552635	3.0459	2.14238
cluster4	2.89743	2.48342	0.670807	0.57423	4.0786	4.11549	3.50867	3.95697	3.68819	3.90019	5.41032	5.39107	4.15755	0.318568	0.319599	1.275	1.15419	6.12985	5.86328	1.7131	4.97569	9.33512	9.04451	11.0026	10.8042	3.25436	2.8159	2.92142	4.73576	6.45488	5.93634	28.0859	-0.349511	0.0148367	2.52648	1.98093
cluster4	2.51852	2.50849	0.57517	0.642449	3.66242	4.04332	4.24031	4.51358	3.39217	3.95091	4.5513	4.79342	4.32341	0.331177	0.298623	1.11865	1.24545	5.95419	5.32091	1.69529	5.38496	8.79488	8.25617	10.565	10.0961	3.4675	2.48771	2.88455	4.74805	5.72597	6.25371	25.9573	-0.671716	-0.515395	3.4653	2.17221
cluster3	3.23332	3.02904	0.791009	0.770602	4.71521	4.37058	4.23634	3.97169	3.6979	4.35687	5.51586	5.92175	4.33637	0.348996	0.338159	1.44831	1.40171	6.44867	6.29455	1.54471	6.01777	9.71126	9.55099	11.8193	11.9233	3.76041	2.80571	3.18775	5.09988	6.55943	6.63236	24.1573	1.43058	-0.56995	2.06686	1.74402
cluster3	3.31131	3.04361	0.804517	0.850317	4.35277	4.4013	4.45135	4.21231	3.69694	4.26197	5.26812	5.34554	4.27932	0.309056	0.31173	1.52326	1.60012	6.78756	6.53522	1.62037	5.14434	10.0134	9.90317	11.571	11.3592	3.62278	2.93122	3.37323	3.99474	6.63573	6.61351	29.0002	-0.382467	-0.10057	2.32382	2.15541
cluster5	2.56266	2.76953	0.590828	0.731076	3.90716	4.40773	4.12349	4.21934	4.05064	4.51985	5.20113	5.42577	3.66236	0.318514	0.287094	1.18526	1.38835	6.0401	5.84582	1.42938	5.35916	8.78928	9.20479	10.4502	11.2464	3.57547	2.51551	3.03759	4.5654	5.9808	6.09543	27.0145	0.0901844	0.358544	2.46071	2.09626
cluster5	2.82239	2.60598	0.714666	0.718674	3.82307	3.80378	4.57986	4.47755	3.20544	3.59787	3.99381	3.98966	3.60158	0.299424	0.290235	1.39378	1.42217	5.43424	5.56601	1.53591	4.74927	8.27733	8.42709	10.3868	9.66378	3.14294	2.77836	3.06103	4.27165	6.62175	6.74047	26.8716	-0.384872	0.090637	3.10195	2.84941
cluster2	2.05027	2.1582	0.436328	0.541832	3.75643	4.13084	3.92958	4.05787	3.10387	3.61741	3.98245	3.77739	3.76093	0.25513	0.247073	0.821543	1.06076	4.91609	5.3354	1.45067	4.62246	7.59503	8.50451	9.79163	9.75569	3.16418	2.32209	2.86121	3.58803	5.57367	5.76098	23.786	-0.493075	0.383626	2.92584	2.84147
cluster5	2.90291	2.66773	0.671205	0.603367	4.16779	3.99342	3.48576	3.95814	3.50566	3.75425	5.22231	5.41092	4.24786	0.308659	0.297236	1.36983	1.26864	6.04171	5.56915	1.69914	5.59616	9.36255	8.85738	11.0715	11.2745	3.51654	2.7587	2.89697	4.25759	6.66829	6.62764	28.1145	1.66806	-0.768883	2.71664	2.21658
cluster5	2.82317	2.70448	0.760428	0.739516	4.56509	4.52729	4.01944	4.18586	4.14973	4.55236	5.45035	5.68096	4.07903	0.32373	0.334212	1.54323	1.3809	6.53009	6.62533	1.804	6.61783	9.78882	10.3772	11.3573	12.3328	4.28585	2.78035	3.1158	4.52121	7.37943	7.08268	28.0288	-0.264882	-0.281591	2.16463	2.08317
cluster5	2.94138	2.64904	0.745839	0.731792	3.80357	3.91368	3.85406	3.95398	3.15685	3.37491	5.49784	5.67039	4.64299	0.289508	0.288258	1.36723	1.39499	5.64522	5.66787	1.48205	5.10957	8.50052	8.70154	10.1865	10.363	3.37391	2.74048	3.03698	3.87785	7.0651	7.05238	26.9859	-0.309577	-0.458935	3.10706	2.10657
cluster4	2.64184	2.38412	0.646423	0.636268	3.97615	4.18338	4.31045	4.40618	3.53265	4.11761	4.26355	4.58762	3.67619	0.311062	0.309602	1.19647	1.1822	6.26574	6.12399	1.66792	4.83756	9.03916	9.0945	11.61	11.0762	3.02129	2.5593	2.91311	4.29993	6.18998	6.58774	25.9431	-0.42952	0.678863	3.32339	2.66491
cluster5	2.72469	2.58798	0.754735	0.779241	3.991	4.13671	4.21387	4.36788	3.49744	4.04149	4.71697	5.02763	3.91924	0.335812	0.333354	1.42011	1.4988	6.26794	6.32438	1.65552	5.30221	9.20217	9.52118	10.6494	10.2739	3.55393	2.68216	3.10797	4.75353	7.15835	6.78923	28.9859	-1.11848	-0.352788	2.54144	2.28598
cluster5	2.73721	2.71976	0.819319	0.821619	3.72759	4.28079	3.68106	4.18661	3.2696	3.7393	5.42364	5.61684	4.25426	0.313331	0.32961	1.45844	1.52852	7.08286	6.29251	1.67308	5.31255	9.56098	9.31672	10.6211	11.2961	3.46363	2.69812	3.15163	4.21521	6.67555	6.92369	28.0573	0.247751	-0.962762	2.66439	3.60215
cluster4	2.34242	2.38743	0.54995	0.629708	4.14076	3.95597	4.16023	4.12673	3.8939	4.2561	4.09839	4.32529	3.58984	0.288122	0.276979	1.1662	1.24185	6.07294	5.7225	1.44839	5.12022	8.37302	8.20459	10.126	8.98245	3.22822	2.76345	3.07164	4.30912	6.60035	6.56978	28.8716	0.574529	-0.691971	2.64329	2.7196
cluster3	3.0008	2.90198	0.757048	0.764894	4.32503	4.52966	4.44037	4.64161	3.78426	4.17017	5.55358	5.62795	4.18836	0.348282	0.351322	1.40297	1.46356	6.78933	6.59737	1.72508	4.86846	10.4819	10.7077	12.5322	13.251	3.9077	2.67084	3.09435	4.36022	7.46477	7.9708	27.1859	-0.33301	-0.0205368	2.13942	2.14839
cluster5	2.85232	2.68717	0.677062	0.647563	3.56117	3.89415	3.82046	4.05346	3.31292	3.67443	4.59264	4.70914	4.08056	0.270921	0.279203	1.19316	1.21084	5.50401	4.72259	1.5922	4.81414	7.95648	7.46752	9.15645	8.16635	3.44409	2.4948	2.8002	4.33664	5.88663	5.39873	23.9573	-0.370728	0.0603169	2.99288	2.7748
cluster4	2.62476	2.37222	0.622578	0.604911	3.4915	3.77814	3.62362	3.60757	3.52523	3.44494	5.42926	5.6288	4.48045	0.305314	0.30872	1.2317	1.16601	6.20433	5.22123	1.43194	4.68275	8.7807	8.36701	9.88635	10.3482	3.51993	2.66579	2.89334	3.35344	6.45762	6.57899	24.0145	-0.850404	0.995425	2.1893	3.59931
cluster3	2.88366	2.872	0.654398	0.643051	4.3848	4.34355	4.10428	4.45145	3.31941	3.56512	5.93861	5.75101	4.48057	0.363526	0.36987	1.32503	1.28217	7.17285	6.34514	1.89308	4.94213	10.1858	9.60923	12.1807	11.7845	3.50286	2.78232	3.23177	4.89998	6.66197	6.76081	26.0716	-0.483551	0.597401	2.31761	2.70331
cluster5	2.71347	2.61396	0.644907	0.680002	4.56243	4.52389	4.64285	4.70854	3.47427	4.01058	5.32546	5.60133	4.20495	0.337928	0.345768	1.27463	1.4448	6.98023	6.44385	1.74691	5.4931	10.2136	9.95964	11.8581	12.2237	3.87257	2.60439	3.18788	4.47674	6.97038	7.397	26.143	-1.41607	0.879652	2.05463	2.55588
cluster2	2.48142	2.27778	0.6358	0.603907	3.80787	3.92991	3.82039	4.17746	3.17286	3.5103	4.89866	5.25259	4.19886	0.264324	0.25508	1.23506	1.20264	5.90466	5.39687	1.69754	4.08931	9.43325	8.06416	11.1294	9.77682	2.90241	2.36928	2.666	4.32093	7.11847	6.61781	25.9145	-0.523871	1.44604	2.48346	2.21891
cluster4	2.86077	2.43095	0.705369	0.550041	4.43558	5.08117	3.94585	4.44405	4.06877	4.69878	4.87289	5.4933	4.22711	0.317329	0.333431	1.55286	1.19093	6.84291	5.79151	1.90583	5.68787	10.9304	9.49633	14.4565	13.0573	3.74564	2.84354	2.80682	5.21095	7.99617	6.76133	26.1002	-0.742311	0.342711	2.32003	1.96943
cluster4	2.54217	2.50042	0.665113	0.64189	4.08883	4.24026	4.14857	4.0174	3.29933	3.89633	4.82197	5.1013	3.96801	0.262149	0.287403	1.29318	1.31585	5.63255	5.19472	1.54538	4.16311	8.63085	8.33829	10.9107	10.8699	2.88752	2.30408	2.81639	3.18353	6.98176	7.09182	26.0288	-1.69647	-0.219363	2.30393	2.17045
cluster4	2.91367	2.37863	0.675746	0.580809	4.33427	4.25776	4.17697	4.1361	3.3477	3.80312	5.09462	5.57299	4.31838	0.269943	0.284747	1.35296	1.11161	6.6037	5.71389	1.78567	5.43959	10.3155	9.22406	11.8704	11.542	3.54478	2.48844	2.59406	4.89129	6.75482	6.08106	27.1145	-1.42909	0.290671	2.64477	1.80725
cluster4	2.67749	2.41236	0.672756	0.644707	4.18002	4.17814	4.39071	4.62762	3.44646	3.6194	4.83364	4.89234	4.18467	0.309304	0.302831	1.27512	1.29678	6.46951	5.857	1.81263	5.06563	9.98378	8.65096	10.7573	9.94777	3.63801	2.48281	2.81199	4.06	6.73893	6.69351	21.2002	-0.896018	2.89164	2.6551	2.5216
cluster5	2.91156	2.77566	0.756176	0.75577	3.69509	3.97758	3.68486	4.14587	3.2209	3.50614	4.70625	4.90867	4.37873	0.315957	0.30927	1.3899	1.403	5.93047	5.67198	1.57689	4.94417	9.68483	9.54861	12.1141	11.6172	3.24661	2.71394	3.14217	3.88199	6.94952	7.34214	22.9573	-0.370728	-0.992881	2.75562	3.44666
cluster2	2.34033	2.24416	0.533032	0.571725	6.31011	6.00087	3.67319	4.06564	2.89641	3.43757	4.42718	4.19055	3.72832	0.279034	0.261329	0.990813	1.0649	5.42611	5.41315	1.45647	4.28133	8.3091	8.94685	10.6439	10.9254	2.72109	2.25305	2.66159	5.66711	5.69967	6.34335	21.0288	-1.01564	-0.211532	3.7245	3.57678
cluster4	2.36178	2.36088	0.600965	0.627819	3.87398	4.06149	4.24074	4.34604	3.1469	3.42125	4.39053	4.39054	3.78925	0.310832	0.297718	1.3116	1.40237	5.54112	5.91435	1.71236	5.47017	8.74812	9.26304	11.2957	10.1055	3.34183	2.38204	2.83013	4.4772	7.19364	7.60232	27.0145	-0.411887	1.10917	2.48994	2.04621
cluster3	3.01288	3.01583	0.857048	0.866883	4.37487	4.68076	4.28846	4.82342	4.05965	4.45793	5.77274	6.00142	4.39974	0.41366	0.391826	1.7541	1.85578	7.48821	7.3109	2.29182	6.66882	12.0907	11.8815	15.0635	14.8768	4.22937	3.02626	3.38761	5.96753	8.68254	8.78748	28.3858	-0.300007	-0.0912837	1.82086	1.77667
cluster5	2.98016	2.78866	0.680163	0.701719	4.23436	4.09383	4.68809	4.44626	3.64016	4.22434	4.75602	4.61278	4.16469	0.337267	0.332599	1.42348	1.47918	6.53748	6.42395	1.8323	5.49075	9.46845	10.3466	12.0423	12.4963	3.29914	2.84142	3.2618	4.15995	7.75852	7.69507	24.8859	-0.382514	0.0855836	3.49525	2.69253
cluster4	2.60957	2.53258	0.60805	0.62147	3.38125	4.00868	3.59513	4.23329	3.39362	3.59365	4.40308	4.47321	4.10906	0.296118	0.293466	1.1421	1.19733	5.38328	5.89498	1.60375	5.03014	8.14902	9.84281	9.14951	10.8964	3.28713	2.40535	2.8831	4.23901	5.73719	6.06593	24.9145	-0.3778	0.0754769	3.26559	2.63913
cluster1	1.85813	1.95259	0.369064	0.479441	3.40757	3.4408	3.88624	3.77297	2.93007	3.40779	3.39448	3.23866	3.49921	0.273514	0.256917	0.610151	0.89677	4.39455	4.79697	1.78671	5.21411	7.15368	7.09173	10.0138	8.06826	3.50468	1.98303	2.51626	3.53301	4.41319	5.01366	25.8145	-0.394301	0.11085	3.56206	2.42336
cluster4	2.55992	2.35305	0.644497	0.626658	3.75653	4.07859	4.13472	4.26558	3.26145	3.77114	3.89067	4.19158	3.41841	0.297788	0.301182	1.18788	1.08632	5.7303	5.33518	1.53402	4.29584	8.11187	8.35362	10.0191	10.4271	3.05881	2.3303	2.62666	4.00728	5.79975	5.40941	26.043	-0.356583	-0.780433	3.09831	3.55923
cluster5	2.65827	2.56811	0.649261	0.746613	3.51824	3.99921	3.29899	3.79968	3.10958	3.63084	4.64175	4.71197	4.37489	0.296398	0.256905	1.18861	1.38786	5.25447	5.49306	1.37151	4.60893	8.1878	8.47524	9.56508	10.0925	3.20846	2.4523	2.93082	3.8413	5.61463	5.85961	21.9859	-0.491327	-0.0906505	2.91052	2.2552
cluster5	2.65052	2.64043	0.69223	0.696092	3.41038	3.96188	3.60259	4.14254	3.21857	3.7116	4.99008	5.49058	4.60476	0.310382	0.305505	1.30158	1.26845	4.89851	5.22668	1.50687	3.55801	6.65453	7.78321	8.29642	9.16556	2.62083	2.33738	2.75273	4.26387	5.801	6.4523	26.1859	-0.33301	-0.0205368	2.58235	2.06874
cluster2	2.44155	2.27783	0.518773	0.532893	3.33175	3.45541	3.61231	3.87437	3.12509	3.50607	4.13693	3.93862	3.68931	0.261237	0.253688	1.10717	1.12114	5.74328	5.68246	1.39599	4.73315	7.67546	8.43075	9.04406	9.54625	3.38987	2.49829	2.91425	3.64854	5.82959	6.14996	26.8574	-0.387229	0.0956903	2.89851	2.89685
cluster4	2.8645	2.53751	0.609262	0.611621	3.8304	4.08695	3.64905	4.0562	3.39197	3.74164	5.42768	5.57824	4.56316	0.324907	0.341641	1.16043	1.21801	6.06239	5.99395	1.77927	5.25469	9.13782	8.83853	11.8038	11.6317	3.54269	2.59061	2.98314	4.60001	7.19699	7.28994	24.9716	-1.38209	1.12041	2.73658	2.16535
cluster3	3.08862	2.88617	0.68758	0.687872	4.31537	4.33942	4.18904	4.45239	3.77806	4.17136	5.42766	5.49269	4.46527	0.338618	0.345288	1.29353	1.33531	6.7664	6.13436	1.85853	4.96336	9.07847	8.76467	11.387	11.8424	3.38703	2.72502	2.97795	4.68387	6.36042	6.69056	28.1002	2.03499	-0.855465	2.46817	2.20478
cluster2	2.18016	2.15574	0.492753	0.581934	3.5558	3.65552	3.83528	3.78296	3.21499	3.5727	3.8171	3.6808	3.60093	0.280454	0.269252	0.85114	1.0181	4.80209	4.44407	1.34125	4.21225	7.46873	7.16708	10.3402	8.9792	2.76897	2.12479	2.61544	3.41894	5.14904	5.42712	26.8574	-0.387229	0.0956903	3.36889	2.30515
cluster2	2.47382	2.21413	0.539366	0.534518	3.78915	3.71687	3.94	4.15998	3.2108	3.75661	4.99086	4.9829	4.39563	0.313	0.309776	1.0871	1.12789	6.07681	4.9434	1.78854	5.13444	9.24077	7.60066	10.712	9.78264	3.31694	2.51623	2.70671	4.50519	6.45397	6.05932	23.8145	-0.702278	3.23169	2.59801	2.08085
cluster1	2.21545	1.98602	0.457117	0.430753	3.35799	3.65537	3.31435	3.69606	3.3268	3.64291	4.69776	4.4791	4.43001	0.262526	0.265827	0.932286	0.906467	5.09164	5.18928	1.69803	4.8283	8.29422	8.36248	10.8358	9.60792	3.25074	2.22067	2.57307	3.6009	6.21436	6.17738	25.9145	-0.3778	0.255696	3.20911	2.45923
cluster4	2.23373	2.44339	0.437641	0.552065	3.80535	4.42539	4.21113	4.29399	3.25728	3.76557	3.87208	3.91324	3.52011	0.312905	0.298935	0.817155	1.11563	4.94723	5.37937	1.95596	5.22615	8.07083	8.12153	10.8288	10.1939	3.42556	2.17522	2.93372	3.97125	5.44787	6.95616	23.8859	-0.607463	0.888385	3.32614	2.60625
cluster1	2.10734	2.04137	0.524643	0.539231	3.71475	3.30196	3.45348	3.52392	3.23248	3.73112	4.46819	4.24786	3.90288	0.252629	0.262906	1.05805	1.06452	5.23842	5.30831	1.46838	5.45272	8.11746	8.30018	10.0009	9.52755	3.23167	2.26772	2.66446	3.98393	6.15352	6.37049	25.9716	0.681169	1.30444	3.2115	2.81135
cluster5	2.96664	2.72918	0.740692	0.716753	3.28858	3.66434	3.51873	4.05683	3.13967	3.35015	5.10868	5.02145	3.90003	0.304159	0.305389	1.35278	1.30619	5.61648	5.45203	1.43	4.59817	8.62535	8.01869	10.4676	9.82448	3.0496	2.69961	2.81669	4.08791	6.31922	6.35555	26.0573	1.24745	0.0602851	2.75084	3.70344
cluster5	2.64752	2.57484	0.650551	0.66157	3.74876	3.88975	3.93725	4.28469	3.15257	3.69848	5.03061	5.11061	3.97758	0.296506	0.296916	1.16229	1.2084	5.41888	4.90295	1.68485	4.66872	9.06818	8.12873	10.7663	11.1	2.91632	2.37404	2.6722	3.72868	6.53066	6.65606	26.9145	-0.669171	0.995746	2.59531	1.75787
cluster4	2.77689	2.42341	0.667794	0.607319	3.42284	4.16337	4.16123	4.09262	3.32396	3.705	4.19877	4.11116	3.83498	0.308515	0.306749	1.30773	1.16028	5.77265	5.11603	1.60565	4.83104	9.35993	8.80655	10.8697	10.4196	2.77085	2.54495	2.82749	4.02519	6.16732	6.66807	24.8574	0.425679	0.608736	3.52271	2.09772
cluster5	2.87727	2.69043	0.711282	0.703007	3.96137	4.20909	3.84394	3.99552	3.233	3.3932	5.23214	5.2519	4.28404	0.322283	0.316759	1.40328	1.37334	6.56476	6.27008	1.75795	5.45644	10.246	9.93581	13.0534	12.5719	3.35857	2.89102	3.21813	4.57448	6.8805	6.71766	26.0573	-0.354226	0.0249434	2.55241	2.5202
cluster1	2.0284	2.05919	0.429179	0.437599	3.55901	3.50189	3.59178	3.53991	3.38044	3.39965	4.64114	4.77033	4.08768	0.255046	0.248633	0.814609	0.863864	4.59652	4.42557	1.56206	4.89157	7.04416	7.09021	10.4192	9.27874	3.387	2.03861	2.30715	3.56142	5.59888	5.37207	26.043	0.38575	-0.670796	3.035	3.15781
cluster4	2.69076	2.49805	0.600614	0.583431	2.94396	3.55207	3.5017	3.65103	3.18646	3.81025	4.31667	4.1137	3.65101	0.284208	0.281068	1.10205	1.09467	5.58224	5.37131	1.26464	5.01051	8.99409	8.24272	10.4994	10.2661	3.3525	2.44031	2.93769	3.6139	5.66431	5.74883	24.9716	-0.36837	0.0552635	3.87222	3.34248
cluster3	3.25705	3.13762	0.847225	0.872831	4.08813	4.40828	3.68107	3.92243	3.66789	4.29818	5.6214	5.6431	4.06144	0.332328	0.338679	1.60748	1.68199	7.10735	6.49836	1.59184	5.58327	10.8746	10.3244	12.6853	11.6482	3.62092	3.03218	3.50653	4.33869	7.33373	7.69316	27.0145	-0.361298	0.0401035	2.13134	2.62974
cluster4	2.75509	2.42807	0.656712	0.615407	3.51556	3.78566	3.29815	3.73605	3.35933	3.64462	5.47254	4.95664	4.18712	0.309042	0.301665	1.15575	1.09608	5.71042	5.61305	1.49658	4.68041	8.02006	7.46669	9.91765	8.65116	3.22162	2.60643	2.88544	3.51453	5.92157	5.55709	19.8002	-0.396659	0.115904	3.06614	2.56802
cluster2	2.6131	2.20051	0.571466	0.476293	3.30385	3.54371	3.38079	3.77546	3.41966	3.94841	5.17409	4.70733	4.05048	0.241749	0.273055	1.01949	0.845917	5.15816	4.31936	1.66597	5.09938	7.58204	7.18173	9.60296	8.89184	3.15516	2.32228	2.39606	4.1736	4.75337	4.39443	24.0288	-0.358941	0.0350501	2.75156	2.38963
cluster4	2.65841	2.44207	0.653362	0.705768	3.29341	3.71249	3.46945	3.53327	3.35073	3.64586	5.0149	4.55924	3.68686	0.2643	0.261369	1.17848	1.24725	5.31621	5.02995	1.33749	5.34112	8.88482	8.79603	11.0658	10.4068	2.85388	2.44498	2.80512	3.60102	5.88314	6.1391	28.9002	-0.380157	0.0805303	2.94941	2.54152
cluster2	2.53611	2.15284	0.540427	0.453913	3.84508	4.24282	3.54641	4.43787	3.75109	4.12986	4.51226	4.25674	3.81085	0.270058	0.291839	1.02959	0.831178	5.42557	4.47372	1.67224	4.38097	8.50616	7.33787	10.3211	9.72764	3.0191	2.37864	2.56804	3.99673	5.75344	4.94178	26.8859	-0.382514	0.0855836	3.3516	2.13693
cluster4	2.56808	2.40872	0.655298	0.644046	3.54063	3.87008	3.57779	4.16168	3.45014	3.70979	4.37571	3.81912	3.93519	0.343004	0.307307	1.31828	1.30088	6.25858	6.28314	1.69995	5.30455	9.33815	8.92015	10.3334	11.419	3.43806	2.88287	3.20042	4.49532	6.30088	6.51022	26.9859	-0.366013	0.0502102	3.12576	3.04647
cluster4	2.26606	2.45148	0.573027	0.555382	3.16858	3.44042	3.63355	3.62572	3.12708	3.49008	4.22577	3.98513	3.86196	0.336406	0.339172	1.2062	1.17095	5.57919	5.51722	1.31015	4.74571	9.10464	8.33574	9.94271	9.86479	3.32238	2.71199	3.21186	3.46214	5.94765	5.59938	25.7717	1.56978	-0.222378	3.57588	2.30012
cluster3	2.6958	2.82646	0.683656	0.743657	4.26978	4.18713	4.05096	4.38133	3.44845	3.78567	5.50217	5.60243	4.12139	0.308887	0.28642	1.40661	1.47709	6.95526	6.86743	1.80807	5.91369	10.0325	10.2367	12.3585	12.6632	3.78088	2.81608	3.06826	5.15185	7.44719	7.41245	29.2002	-0.771475	0.96516	1.83213	1.97604
cluster4	2.90635	2.57432	0.761132	0.624467	4.51337	4.72007	4.28259	4.72209	4.06207	4.39071	5.71026	5.92755	4.06088	0.32246	0.32569	1.62654	1.43031	7.94869	7.46386	2.1147	6.22882	12.1579	12.1805	14.5645	14.632	3.84526	3.10109	3.16825	4.99327	8.12157	7.27046	26.1002	-0.347154	0.00978336	2.0261	2.08883
cluster2	2.35003	2.31029	0.538549	0.579672	3.29312	3.39288	3.54058	3.77533	3.23001	3.658	4.20711	4.3798	3.95243	0.300646	0.283156	1.09738	1.23284	5.40621	5.2039	1.66854	5.38623	8.44018	8.45091	10.3784	9.31111	3.34864	2.41367	2.98871	3.70008	6.34388	6.32199	27.9145	-0.893348	0.149975	2.90956	2.19023
cluster2	2.40999	2.27603	0.583898	0.58239	2.53773	3.36613	4.17923	3.94953	3.30678	3.61101	4.57716	4.72976	3.60998	0.272382	0.272099	1.13914	1.14283	5.74694	5.49263	1.60351	4.82036	8.2139	8.58208	9.94552	10.1174	3.28409	2.55325	2.77364	3.47219	5.59882	5.66977	26.0002	0.843638	-0.984547	3.03652	2.32434
cluster3	2.97194	2.82337	0.760765	0.766979	4.11244	4.26097	3.54823	3.95908	3.93673	4.27069	5.4257	5.59635	4.18822	0.352487	0.360995	1.60289	1.56115	7.01816	6.88366	1.71869	6.15788	10.8163	10.847	12.1816	12.8371	4.32883	3.04506	3.43611	5.03942	7.73133	7.47818	23.0573	-0.354226	0.0249434	2.11535	2.1307
cluster5	3.05875	2.81098	0.724455	0.727158	3.90361	4.06111	3.92465	3.94903	3.73	4.13883	5.24064	5.58865	4.10355	0.29163	0.304358	1.39872	1.40442	5.68725	5.80003	1.58261	5.83918	8.99385	9.1317	11.3201	10.9798	3.37299	2.73724	3.18566	4.29211	6.41995	6.26821	24.043	-0.631349	0.87587	2.19228	1.76434
cluster4	2.70312	2.4422	0.679505	0.671347	3.74069	3.9818	4.18048	4.0461	3.68034	3.83152	4.86853	4.85121	3.97494	0.288862	0.277766	1.37333	1.32775	6.4276	6.08189	1.63632	4.88476	9.51965	9.06891	10.7039	10.1139	3.46345	2.48385	2.71844	4.41614	6.77421	6.91568	26.9716	-0.36837	0.0552635	2.48945	3.01528
cluster5	2.88461	2.68814	0.718762	0.690331	3.71926	4.18102	4.22421	4.13539	3.7811	3.98754	5.13278	5.1893	4.16141	0.307743	0.321426	1.4559	1.36832	6.54185	6.17153	1.71153	6.1164	9.684	9.46794	12.8645	12.4005	3.54141	2.6973	3.12286	3.56716	7.33253	7.19817	27.9431	0.178283	0.21818	2.47397	2.07205
cluster5	2.8428	2.79954	0.720876	0.730033	4.22402	4.53032	4.06601	4.48726	3.61562	4.02412	5.57529	5.68874	4.07279	0.34327	0.328	1.46722	1.44113	6.7213	6.78113	1.76562	5.79938	9.90017	10.4697	11.9416	13.3649	3.92651	2.58604	3.09395	4.55296	6.74678	6.88338	22.0716	1.27057	-0.676987	2.17769	1.87674
cluster4	2.74938	2.39736	0.689209	0.65776	4.04109	3.87804	4.10437	4.1088	3.35598	3.84628	5.29244	5.33662	4.19026	0.309176	0.319017	1.30268	1.28254	6.7479	6.47459	1.79553	5.79312	10.2632	9.9848	12.2175	12.2982	3.63196	2.62734	2.90896	4.12266	6.54487	6.66722	26.9431	-0.332342	0.335649	2.48561	2.34382
cluster5	3.13593	2.78837	0.837443	0.784207	3.83771	3.73224	4.30314	4.37701	3.58481	3.86953	5.05719	5.2626	4.28514	0.320707	0.304791	1.57252	1.61184	6.38951	6.38035	1.7343	5.55596	9.78299	10.7313	12.3222	12.3834	3.74893	2.91552	3.11865	4.42569	7.69003	7.93652	28.0573	0.691162	-0.151158	2.1556	2.2459
cluster3	3.48893	2.79105	0.936213	0.89993	4.00261	4.13543	4.04216	4.34479	3.59709	3.91914	5.54955	5.9156	4.38528	0.376153	0.370362	1.7135	1.6158	6.90103	7.09776	1.90208	6.1835	10.4514	10.894	12.9755	12.1771	4.30686	3.02299	3.32928	4.46816	7.80568	8.03786	25.1002	1.16319	-0.804562	2.10322	2.00208
cluster5	2.81396	2.74338	0.664319	0.693508	3.85895	3.83577	3.62751	3.81853	3.44714	3.8562	5.29356	5.31181	4.26183	0.311822	0.319378	1.43337	1.3566	7.22787	6.72792	1.637	6.04462	11.2754	10.0761	13.6345	12.4375	4.31908	2.71045	3.0345	4.27171	7.22628	7.23868	26.1716	-0.605981	-0.0858631	2.32275	1.62456
cluster4	2.5418	2.51381	0.584887	0.616047	3.46001	3.5512	3.87711	3.95587	3.53664	4.2077	4.24588	4.54705	3.95999	0.278587	0.280185	1.14154	1.23661	5.48995	5.43837	1.35401	4.26265	8.6158	8.38261	11.1879	10.6861	3.04369	2.599	3.11094	4.27604	6.36604	6.5251	26.8716	0.612152	-0.191822	3.37381	2.11438
cluster3	3.32435	3.2984	0.817738	0.862626	4.84722	5.38361	4.24954	4.85705	4.08949	4.71528	6.41319	6.66381	4.63359	0.370044	0.370083	1.58852	1.57204	7.26389	6.90294	2.00429	5.44328	10.49	10.0757	13.2015	12.6742	4.15279	2.97495	3.26738	5.20586	7.57189	7.85523	28.2716	0.678158	-0.333315	2.0571	2.34724
cluster5	2.84159	2.81524	0.664217	0.727749	4.52724	4.50902	4.08866	4.16733	3.79644	4.34991	5.85639	5.97163	4.27533	0.317691	0.339799	1.30449	1.37103	6.85726	6.33905	1.75715	5.51299	9.65577	9.29357	11.7243	11.5143	3.7848	2.54504	3.04538	4.5883	6.3089	6.81396	27.1002	0.64987	-0.272675	2.24567	1.83609
cluster4	2.54308	2.34194	0.677041	0.633183	3.34278	3.7576	3.57823	3.75006	3.19006	3.51587	4.24695	4.4913	3.99749	0.284209	0.26703	1.30364	1.25676	5.4867	5.02196	1.48419	4.92137	8.13753	7.99117	10.0956	10.2775	3.16302	2.70843	2.9295	3.64041	6.38931	5.8106	26.8288	0.60508	-0.176662	3.22837	2.61305
cluster3	2.94931	2.86744	0.777164	0.782914	4.04796	4.30415	3.62805	4.04323	3.94204	4.21842	5.81116	6.20972	4.3879	0.320979	0.325268	1.45236	1.43014	6.43718	6.18088	1.53653	5.87646	9.3032	9.27362	11.3821	12.128	3.69649	2.81057	3.12766	4.34226	7.14659	6.81555	28.1145	0.652227	-0.277729	2.25819	1.89708
cluster5	2.80334	2.72717	0.731746	0.74992	4.56738	4.58524	4.02038	4.19518	3.5533	4.0934	6.05261	6.18456	4.31094	0.35374	0.349552	1.39638	1.38676	7.07748	6.5451	1.72394	5.39336	9.5641	9.26083	11.0201	11.052	3.33975	2.62551	2.83921	4.83393	6.47077	6.50782	28.2859	0.680516	-0.338369	1.91929	1.80424
cluster5	2.9571	2.76441	0.734973	0.730263	4.48142	4.25201	4.23891	4.30596	3.98873	4.30745	5.96618	6.37325	4.13615	0.325974	0.337966	1.58182	1.49398	6.93341	6.68367	1.85243	5.78022	9.72499	9.96647	12.7342	12.8466	3.62526	2.86809	3.07583	5.07695	7.54727	7.77104	26.1145	0.652227	-0.277729	1.93892	1.85949
cluster5	2.93963	2.74474	0.732224	0.749487	4.54863	4.48721	4.25273	4.4051	4.0076	4.60069	4.7539	5.00788	3.98951	0.336503	0.341175	1.36755	1.40559	6.3586	6.15153	1.85381	6.1016	9.58098	9.52125	11.434	11.9615	4.04816	2.72404	3.03799	4.76014	6.74189	7.39351	26.0716	0.645155	-0.262569	2.58399	2.06171
cluster5	2.6312	2.69356	0.608806	0.627082	4.12975	4.22704	3.83086	3.8161	3.37325	3.9505	5.50526	5.82163	4.4186	0.290178	0.302034	1.12551	1.19789	6.13352	5.46005	1.55969	5.65461	8.76585	8.41623	10.4752	10.3247	3.48403	2.42593	2.86567	4.20635	5.65329	5.86697	29.0716	0.645155	-0.262569	2.63824	1.88024
cluster3	3.26363	3.05182	0.760413	0.757058	4.90076	5.0237	3.94809	4.33526	3.89725	4.51789	6.21878	6.53646	4.46238	0.332074	0.35093	1.5745	1.46858	7.56421	6.98681	1.93154	6.09426	11.0875	11.1063	14.4743	13.72	3.63154	2.94691	3.17566	4.79961	7.19803	7.05993	29.143	0.656942	-0.287835	1.91369	1.90843
cluster3	3.17944	2.89273	0.724535	0.751986	4.63146	4.94251	4.10792	4.48	4.00669	4.37524	5.80506	6.12827	4.51855	0.327169	0.306343	1.34432	1.40998	6.25772	6.22248	1.82929	5.21554	10.0361	10.468	13.0756	13.4637	3.40539	2.64611	2.95715	4.76189	7.90369	7.67524	27.043	0.640441	-0.252462	2.06907	2.12712
cluster5	2.85204	2.76403	0.692046	0.736954	4.2292	4.76206	3.79021	4.31615	3.82906	4.32053	5.43046	5.65509	4.15883	0.343356	0.311908	1.38013	1.42218	6.70239	6.55991	1.68856	5.86525	9.79023	9.90004	12.2942	12.3587	3.62628	2.7008	2.91505	4.47716	7.36144	7.2704	26.2287	0.671086	-0.318155	1.888	2.15972
cluster3	3.53183	3.25893	0.889625	0.858658	4.43643	4.69582	3.72697	4.38191	4.16832	4.36325	6.29236	6.59106	4.72109	0.347486	0.349965	1.64947	1.56664	7.22482	7.04084	1.84892	5.97408	11.1444	10.3818	13.6259	12.805	4.02803	2.84707	3.29565	5.07504	7.99691	7.63353	29.243	0.673444	-0.323209	2.0132	1.67589
cluster4	2.82242	2.52976	0.637463	0.579396	3.18837	3.64377	3.23713	3.68054	3.05855	3.50463	5.35148	5.52551	4.32967	0.272072	0.273785	1.14998	1.09738	5.67424	5.6848	1.38694	4.11342	8.13076	8.21159	10.3506	10.0186	2.98489	2.45166	3.02063	3.76934	5.66399	5.89972	26.9859	0.631011	-0.232248	2.68959	2.92549
cluster5	2.89548	2.70418	0.672154	0.660075	4.13098	4.49494	3.55436	4.24267	3.62184	4.01256	4.70774	4.73623	4.11813	0.291533	0.291318	1.36463	1.22143	5.98276	5.89268	1.43891	5.06067	9.15668	9.11233	11.0334	10.3563	3.47169	2.78585	3.03277	3.84717	6.9555	6.39376	27.8288	0.60508	-0.176662	2.81454	2.22125
cluster3	3.14678	2.97333	0.823975	0.846459	4.74607	4.64402	4.23211	4.58228	3.71007	4.28876	6.39167	6.57165	4.76967	0.368763	0.359231	1.60989	1.58507	7.23569	6.88736	1.89768	6.60445	10.5783	10.6112	13.4026	13.4245	3.9978	3.00195	3.21751	5.0709	8.0315	7.19857	29.2716	0.678158	-0.333315	1.9598	1.96074
cluster3	3.21784	3.15558	0.7559	0.774539	4.35571	4.346	3.8879	4.17057	3.55162	3.93356	5.83309	6.16007	4.708	0.327395	0.338279	1.42772	1.42871	6.66433	6.35012	1.73732	4.88951	9.77102	9.06686	11.8741	11.4409	3.49153	2.84666	3.08982	4.20206	7.1413	7.09155	29.1859	0.664014	-0.302995	1.90699	3.37279
cluster5	2.96628	2.75247	0.701351	0.692597	4.1879	4.56989	3.73824	4.01273	3.81155	4.29975	5.93825	6.38243	4.43938	0.320725	0.339062	1.3398	1.2907	6.56328	6.11745	1.61904	5.2274	10.0283	9.64162	12.0063	12.1989	3.56295	2.66263	3.00547	4.46733	6.6515	6.26203	29.2144	0.668729	-0.313102	2.09577	2.43765
cluster3	3.33652	3.14684	0.80717	0.806772	4.15272	4.55457	3.98326	4.31607	3.88319	4.55092	6.9066	7.34268	4.99016	0.337511	0.353061	1.53434	1.53985	6.95918	6.46751	1.75504	5.62158	10.0188	9.71106	12.7309	11.8126	3.4337	2.90396	3.15724	4.41314	6.96544	7.0274	29.3001	0.682873	-0.343422	1.84926	2.24489
cluster3	3.28887	3.1072	0.772723	0.782717	4.46329	4.50044	4.1607	4.26761	4.0927	4.53974	6.13832	6.65877	4.73037	0.354475	0.339185	1.44337	1.57885	6.57325	6.71916	1.73176	5.82913	9.90892	10.2657	13.2085	12.9731	3.92175	2.8483	3.37208	4.97044	7.47755	7.42913	28.3001	0.682873	-0.343422	2.05655	2.22308
cluster5	2.93341	2.78786	0.7102	0.707734	3.56687	3.86414	3.57259	4.06624	3.4646	4.0142	5.44945	5.9025	4.49346	0.300897	0.303142	1.42051	1.37961	6.18228	5.91081	1.72721	5.66548	9.23374	8.95769	11.489	11.8347	3.55004	2.69595	2.90163	5.12771	6.76616	6.7424	29.3001	0.682873	-0.343422	2.03909	2.0967
cluster5	2.96305	2.7643	0.727589	0.737118	5.07305	5.09349	4.70657	5.23619	4.27886	4.84073	5.83042	6.1666	4.6114	0.341449	0.343868	1.46737	1.38825	7.26504	6.99412	1.76666	6.61626	10.6632	10.4933	13.1313	12.8201	4.04212	2.99534	3.34361	5.06284	7.33091	7.55447	28.0145	0.635726	-0.242355	2.16128	2.05449
cluster5	2.88982	2.73778	0.756973	0.720029	4.13578	4.19035	4.08815	4.2388	3.961	4.26191	5.17555	5.24478	3.9015	0.296193	0.301466	1.43283	1.36934	6.33141	6.19759	1.53579	5.54836	10.1326	9.66055	12.2679	11.5782	3.73078	2.63047	2.97324	4.64371	7.15677	6.94585	28.0716	0.645155	-0.262569	2.42232	3.10134
cluster3	3.0524	2.90718	0.751626	0.755891	4.58963	4.6806	3.73093	3.95122	3.8762	4.31715	5.79868	6.02768	4.30129	0.34393	0.321814	1.3949	1.47025	6.44114	6.805	1.5563	5.41729	9.26057	9.59779	11.8735	11.786	3.26624	2.5725	3.05873	4.50696	7.01589	6.69667	28.0859	0.647513	-0.267622	2.22682	2.10328
cluster5	2.80431	2.63785	0.733814	0.723578	4.754	5.08484	4.00393	4.88182	3.85035	4.24276	5.75168	5.99859	4.83917	0.298982	0.320489	1.32305	1.35412	6.45713	6.53128	1.83947	5.52407	9.42187	9.1831	12.8214	12.0751	3.77677	2.86097	3.27873	5.44897	6.8024	7.01484	28.1287	0.654585	-0.282782	2.2078	2.30607
cluster3	3.13672	3.05194	0.74573	0.742238	4.42701	4.67532	3.77888	3.66095	3.44226	4.00485	5.47587	5.70239	4.41461	0.282043	0.320848	1.43685	1.50853	6.79973	6.59268	1.41962	5.4006	9.58436	8.81285	11.5478	10.0246	3.85872	2.98251	3.35275	4.53648	6.91075	6.5531	24.1002	0.64987	-0.272675	2.33489	2.36026
cluster3	3.17306	3.00754	0.777589	0.762184	4.24875	4.5656	4.16506	4.45912	3.81153	4.31448	5.55406	5.87768	4.45763	0.347261	0.342866	1.51163	1.58128	6.83952	6.67566	1.834	6.07699	10.9513	11.0091	13.5585	13.474	4.13296	2.83263	3.1907	4.92277	7.16334	7.56909	29.1716	0.661657	-0.297942	2.37505	2.0428
cluster3	3.1545	2.8972	0.806814	0.839171	4.30231	5.00176	3.81172	4.66259	4.12966	4.32192	6.24546	6.66046	4.46863	0.319337	0.315848	1.5592	1.57107	7.18974	6.83487	1.89104	6.65809	11.6509	10.4521	14.836	13.2478	3.93631	2.80975	2.98987	4.57315	7.18202	7.17719	27.2859	0.680516	-0.338369	2.17718	2.12189
cluster3	2.86357	2.93676	0.696075	0.684114	4.6062	4.52778	4.3629	4.28261	3.73319	4.29268	5.37695	5.76256	4.19909	0.309046	0.318088	1.38322	1.27012	6.83391	6.05449	1.62696	6.76296	10.4286	9.69073	12.0085	11.4628	4.17399	2.62737	2.92012	5.20088	6.41977	5.80117	29.1716	0.661657	-0.297942	1.85386	1.90464
cluster5	2.92795	2.7862	0.749005	0.732201	4.54271	4.98135	4.35899	4.55876	4.07037	4.43337	5.82784	6.12986	4.40864	0.315839	0.323623	1.46399	1.41168	6.69441	6.64248	1.98406	5.63849	10.5602	10.9415	13.7528	13.6476	3.71162	2.74656	3.10093	5.01319	7.31326	7.21855	28.2144	0.668729	-0.313102	2.19923	2.23779
cluster5	2.98694	2.75028	0.7142	0.760747	3.84462	4.13545	3.71082	4.06752	3.42287	3.88519	5.63353	5.95637	4.8131	0.306744	0.308894	1.41634	1.44757	5.97317	5.65979	1.55324	5.15255	9.15233	8.87792	11.6796	10.7787	3.42318	2.63889	2.86662	4.38621	6.6257	6.90831	29.243	0.673444	-0.323209	2.62646	2.74155
cluster3	3.06993	3.0374	0.757	0.786855	4.32712	4.34726	4.20908	4.22896	3.49718	3.87783	6.46331	6.55238	5.02727	0.320178	0.313254	1.43659	1.49285	7.09974	7.00178	1.62836	5.70861	10.9952	10.9683	12.1137	12.2211	3.65932	2.72317	3.14528	4.53224	7.48966	7.55679	28.1287	0.654585	-0.282782	2.02165	2.37786
cluster5	2.97399	2.70277	0.724931	0.717627	3.86953	3.75577	4.18438	4.24024	3.45472	3.95152	5.31039	5.64747	4.43008	0.328336	0.31811	1.37063	1.35643	6.39337	5.88034	1.94033	5.14411	10.1301	9.18945	12.4718	12.1478	3.3879	2.73386	3.03323	4.1298	6.859	7.01618	26.1145	0.652227	-0.277729	2.67165	2.83694
cluster3	3.16999	2.95057	0.750564	0.743967	4.24283	4.30308	3.92504	4.2314	3.57764	3.91426	6.20279	6.64316	4.65298	0.352532	0.363556	1.40593	1.35979	7.11479	6.61053	1.77388	5.71068	9.81669	9.69298	10.85	11.3686	3.92689	2.58858	2.77589	4.22083	6.78643	6.82381	29.2573	0.675801	-0.328262	2.25108	2.22028
cluster5	2.86804	2.70881	0.681651	0.675966	4.2221	4.4967	4.14302	4.15116	3.56874	4.03799	5.28433	5.52113	4.2657	0.281108	0.292501	1.27764	1.22857	5.94972	5.4898	1.71905	5.02207	8.69748	8.16763	10.8363	10.4511	3.32455	2.59723	2.77168	4.01812	6.04932	6.09032	27.0145	0.635726	-0.242355	2.3943	2.25196
cluster5	2.97074	2.67677	0.698801	0.694851	4.20304	4.62904	4.25432	4.62127	3.59388	3.98991	5.77526	6.00641	4.61687	0.317509	0.329405	1.38587	1.30935	6.27068	6.07374	1.90637	5.87376	10.0212	9.75506	13.2773	12.7686	3.49791	2.68178	2.78465	4.57825	7.18032	6.94611	28.1859	0.664014	-0.302995	2.14659	2.46378
cluster5	2.83389	2.69987	0.733888	0.739334	4.51985	5.111	4.27087	4.58457	3.64256	3.81493	5.87448	6.11136	4.32988	0.316136	0.331483	1.48586	1.40498	6.83041	6.39433	1.93391	5.57918	10.4283	9.5921	12.1957	11.8749	3.36688	2.75339	3.00039	4.80167	6.85549	6.6115	27.1287	0.654585	-0.282782	2.07123	1.83756
cluster5	2.96363	2.76454	0.708805	0.697239	3.45522	3.8964	3.99672	4.14405	3.97287	4.27034	4.98808	5.18872	3.94321	0.306239	0.307414	1.31782	1.30918	5.84255	5.80789	1.66194	5.26911	9.75395	9.82165	12.7312	11.5392	3.43561	2.71391	2.99373	4.09097	7.40635	6.62891	28.9431	0.623939	-0.217088	2.66043	1.94413
cluster5	2.76619	2.67942	0.660681	0.647091	3.4943	3.77029	3.64082	3.83064	3.60731	4.0678	5.40433	5.5888	4.05495	0.306012	0.300292	1.25255	1.16491	5.61193	5.79427	1.63325	5.33467	9.05372	8.59182	11.4721	10.9848	3.57325	2.47413	2.86085	3.83806	5.94317	5.58868	28.0288	0.638083	-0.247408	2.37174	1.78566
cluster3	2.69302	2.81755	0.759567	0.766121	4.19585	4.33061	4.46129	4.34077	3.80594	4.2189	4.61624	4.85855	4.00819	0.32614	0.328917	1.50113	1.412	6.95764	6.38479	1.60154	5.36254	10.3936	9.89091	12.6508	11.9618	3.40774	2.74609	3.01001	4.9547	7.22646	7.55714	28.0145	0.635726	-0.242355	2.85763	2.05332
cluster3	3.3562	3.43377	0.850252	0.866765	4.89387	5.01239	4.21038	4.5168	4.34649	4.58872	6.77718	7.15278	4.81624	0.387969	0.394282	1.59055	1.6644	7.18138	7.0757	2.25453	6.00308	10.419	10.706	13.0256	12.9732	3.89932	2.73734	3.2531	5.38986	8.13005	8.55175	29.3001	0.682873	-0.343422	1.61312	1.86048
cluster5	2.81981	2.69457	0.667968	0.637977	3.59924	3.8915	3.61622	4.19887	3.39559	3.73146	5.46635	5.60535	4.37162	0.327807	0.320213	1.14496	1.22445	6.24308	5.87246	1.76716	5.41359	9.12636	8.89604	10.483	10.5436	3.8154	2.50055	3.00361	4.1234	6.00669	6.08403	26.0859	0.647513	-0.267622	2.32192	2.8423
cluster3	3.04293	2.88545	0.742043	0.743522	4.32266	4.70378	4.10327	4.36342	3.99055	4.27459	5.36588	5.57904	4.16032	0.312415	0.311523	1.27756	1.41151	6.56402	6.1366	1.70361	5.0258	10.2265	9.42527	12.2384	11.468	3.42822	2.66855	3.07882	4.62822	6.85894	7.11328	26.0859	0.647513	-0.267622	2.71745	2.42857
cluster3	3.13769	2.91544	0.744903	0.754037	4.43669	4.48652	4.17369	4.35194	3.92062	4.34737	5.96528	6.35281	4.2313	0.338997	0.344234	1.48794	1.50181	7.36486	6.55524	1.94671	6.38892	11.9067	11.0197	14.6717	14.1136	3.99903	2.62942	2.93569	5.08644	7.40017	6.65734	29.2859	0.680516	-0.338369	1.89363	1.83974
cluster5	2.8452	2.76209	0.76325	0.704767	3.99771	3.85294	3.83096	4.29178	3.57653	3.96398	5.27182	5.86517	4.04914	0.309666	0.312632	1.45168	1.39344	6.23129	6.03152	1.72001	5.93161	9.28371	9.54643	11.4757	12.1825	3.84145	2.58889	2.94164	4.17104	7.26612	7.2475	29.143	0.656942	-0.287835	2.21849	2.17685
cluster5	3.08039	2.74953	0.73567	0.736551	4.26649	4.26322	4.41154	4.51637	3.69269	4.30269	5.73958	6.081	4.40367	0.338127	0.326959	1.34769	1.30298	5.90698	6.08534	1.8975	6.00017	9.94784	9.53818	13.454	12.1156	3.7662	2.60658	2.8994	4.26302	7.17058	6.53991	28.0288	0.638083	-0.247408	2.14345	1.62068
cluster3	2.69984	2.96114	0.760745	0.834492	4.51244	4.90879	4.2301	4.36179	3.70933	4.33956	5.16372	5.64163	4.17303	0.318116	0.323102	1.52078	1.58214	6.61069	6.908	1.74415	5.1728	10.0503	10.0964	11.5314	11.5276	3.7212	2.84665	3.24542	5.08978	7.58405	7.54473	27.143	0.656942	-0.287835	1.98428	2.40166
cluster4	2.57531	2.39535	0.597761	0.587205	3.69576	3.97396	4.04699	4.07484	4.15415	4.26504	4.03353	4.02492	3.60324	0.279958	0.273043	1.27848	1.20401	6.28419	5.52746	1.65863	5.18184	9.81741	9.16931	12.2313	12.2677	3.37459	2.5955	2.81988	3.67584	6.66722	6.99233	27.8859	0.61451	-0.196875	3.70727	2.78176
cluster3	2.60279	2.82378	0.690083	0.756401	4.49223	4.61475	3.92523	4.37189	3.88718	4.37158	6.23095	6.67746	4.56083	0.327607	0.320145	1.55337	1.49677	7.01089	6.4235	1.90003	5.40627	10.6422	10.0158	13.0518	12.7805	3.44857	2.80847	2.9714	5.05517	7.20764	6.75328	27.2002	0.666372	-0.308049	2.13096	1.74002
cluster5	2.87169	2.69849	0.683262	0.678753	3.54462	3.82925	3.55218	4.03832	3.68684	3.94588	5.53486	5.73824	4.17918	0.307586	0.305173	1.33688	1.35993	6.01448	5.71492	1.65091	5.29072	9.63116	8.91041	12.1102	11.9964	3.36503	2.59284	2.78715	4.50899	6.34728	6.43659	29.2287	0.671086	-0.318155	2.47228	1.96869
cluster5	3.39557	2.72548	0.852942	0.642494	3.62709	3.92906	3.64393	4.12926	3.42528	3.81608	5.40412	5.67561	4.30542	0.27131	0.305357	1.52982	1.23857	5.33506	4.89569	1.65115	4.73395	8.19719	7.82569	10.1266	10.1486	3.12151	2.66951	2.77324	4.43406	6.12381	5.4851	27.0859	0.647513	-0.267622	2.40178	2.37782
cluster3	2.95842	2.83045	0.759595	0.712012	4.1792	4.24599	3.60306	4.00508	3.76202	4.09301	5.53719	5.77749	4.22008	0.319472	0.311572	1.44752	1.36131	5.94939	6.14698	1.69339	5.54481	9.36346	9.20425	12.9388	11.7242	3.67435	2.71942	2.90105	4.77823	6.23056	6.23917	27.2002	0.666372	-0.308049	2.06343	2.04295
cluster2	2.55014	2.32255	0.645898	0.596838	3.73395	4.2382	3.82518	4.10039	3.44473	3.86027	5.17641	5.48963	4.03862	0.333639	0.334182	1.28978	1.27024	6.20388	6.2288	1.59452	5.7754	9.07335	9.22009	10.5552	11.3288	3.7043	2.47608	2.86312	4.59649	6.80955	6.44968	29.243	0.673444	-0.323209	1.8792	2.4751
cluster5	2.90321	2.76636	0.697463	0.72179	3.69801	3.95152	3.26313	3.86855	3.45193	4.05125	5.92441	6.36749	4.53305	0.291277	0.284874	1.40591	1.43868	6.20706	5.85544	1.64609	4.54988	8.91874	8.56754	10.7463	11.5399	3.26708	2.72064	3.06767	4.11638	6.38276	6.48269	27.243	0.673444	-0.323209	2.21037	3.73829
cluster3	2.99973	2.81254	0.773424	0.768264	4.10291	4.51335	3.33662	3.97257	3.80835	4.28837	5.83957	5.8585	4.19554	0.339631	0.340033	1.45231	1.40348	6.89768	6.63484	1.97623	6.74944	10.9962	10.8871	13.0387	13.0327	4.31411	2.71555	3.08609	4.27076	7.29526	7.21622	27.0859	0.647513	-0.267622	2.18729	2.55702
cluster3	3.22737	2.95191	0.768808	0.761304	4.2732	4.53135	3.6573	4.13766	4.02514	4.42876	6.96488	7.18971	4.6801	0.405714	0.42014	1.43744	1.42758	7.02632	6.76452	2.09944	6.58533	11.1095	10.9862	13.9817	14.0466	4.43655	2.80758	3.083	5.00772	7.38078	7.48434	29.2573	0.675801	-0.328262	1.88246	2.22138
cluster3	3.24995	3.16548	0.769571	0.847804	4.40333	4.09749	3.69074	4.12202	4.06232	4.40614	6.179	6.33176	4.27047	0.362799	0.367884	1.529	1.65606	7.17453	6.87269	2.20891	6.99508	10.5723	10.9221	14.1644	14.0543	4.23714	2.916	3.3813	5.62188	7.65532	7.99889	28.2573	0.675801	-0.328262	1.73374	1.54633
cluster3	3.03447	2.99007	0.706111	0.751641	4.31625	4.46632	4.2163	4.39367	3.77493	4.55687	5.35127	5.39736	4.07188	0.394074	0.374047	1.45465	1.4841	7.70369	7.41524	1.96109	7.09926	12.5505	11.774	14.735	14.2819	4.19944	2.96437	3.34172	4.54533	7.27157	7.06765	26.0288	0.638083	-0.247408	2.7719	2.25737
cluster3	3.35791	3.24048	0.87375	0.888857	4.83943	5.14868	4.16363	4.28209	4.11061	4.49871	6.96028	7.04792	4.45144	0.43099	0.445164	1.61058	1.55997	7.2672	7.22879	2.22059	6.49008	11.1854	11.096	14.7592	13.7678	4.47632	3.13215	3.46154	4.99004	7.49721	7.65453	27.0859	0.647513	-0.267622	2.02896	2.44726
cluster3	3.32954	3.05187	0.81945	0.833461	4.75237	4.69634	4.22282	4.397	4.02591	4.45603	6.05666	6.29199	4.40899	0.341666	0.344053	1.61675	1.5305	7.13733	6.49772	1.84927	6.13581	10.6424	10.3306	13.3581	13.8152	4.22364	2.96253	2.99602	5.38737	7.94593	7.2965	29.2716	0.678158	-0.333315	1.70598	1.95798
cluster5	2.94835	2.80322	0.712835	0.71089	4.58046	4.58578	3.9094	4.22006	4.12159	4.45994	6.64342	6.70995	4.59613	0.349936	0.331377	1.4151	1.32403	6.54923	6.41263	1.8704	5.26744	9.56965	10.0333	12.3408	12.422	3.51947	2.62886	2.87362	5.19786	7.19633	7.30555	29.2573	0.675801	-0.328262	1.74099	2.13876
cluster3	3.18348	2.99411	0.777612	0.82169	4.28246	4.62583	3.95729	4.36453	3.60386	3.94939	6.06613	6.18694	4.53791	0.334477	0.326641	1.47811	1.50347	6.58349	6.27894	1.68262	5.51017	10.515	10.0697	13.2464	12.2962	3.45461	2.84027	3.06249	4.44348	7.44805	7.45869	26.1002	0.64987	-0.272675	2.14446	2.41121
cluster5	2.92624	2.65555	0.727259	0.716192	4.17847	4.09885	3.86495	4.13166	3.27277	3.51424	5.86916	5.90528	4.49771	0.331804	0.344418	1.44981	1.4237	7.31309	6.84427	1.8296	6.13857	10.6947	10.1941	12.9711	13.4113	4.05344	2.74102	3.11485	4.24313	6.76514	7.01261	29.1859	0.664014	-0.302995	1.62707	1.74134
cluster3	3.12564	2.88369	0.769856	0.752843	4.51406	4.79965	4.01667	4.51141	4.59933	5.10589	5.99018	6.32119	4.27635	0.354916	0.343779	1.45412	1.43891	6.22753	6.20272	2.14592	6.18188	9.88075	9.63475	11.8685	11.5806	3.84184	2.57937	2.98341	4.22809	7.00074	6.89939	29.2716	0.678158	-0.333315	1.99271	1.79931
cluster3	3.35106	3.10925	0.807438	0.849169	4.25536	4.17236	4.08595	4.37921	3.83021	4.16969	6.39361	6.54978	4.40519	0.372948	0.364834	1.54191	1.58811	6.91921	6.87128	1.86658	6.16276	11.5587	11.2204	15.1404	13.8176	4.0827	2.90668	3.18469	4.83386	7.60189	7.86662	27.243	0.673444	-0.323209	1.57525	1.96851
cluster3	3.18113	2.98383	0.846032	0.813414	4.53228	4.75906	4.28159	4.62728	4.04392	4.14181	6.11436	6.29988	4.46713	0.360498	0.360112	1.63804	1.55051	6.78792	6.49966	1.94473	6.08289	10.7167	10.037	13.433	13.2178	3.72944	2.97851	3.22408	4.5703	7.92349	7.88034	27.143	0.656942	-0.287835	2.00875	2.60083
cluster3	3.25493	2.98868	0.801123	0.812071	4.45121	4.66651	3.92752	4.36273	3.83686	4.18135	6.84716	7.04536	4.43595	0.405456	0.376198	1.47345	1.46931	7.14313	6.92095	2.20433	6.44128	11.8445	11.3787	14.1122	13.7655	4.20274	2.73352	3.0632	5.27135	7.12032	7.11973	27.2573	0.675801	-0.328262	1.86453	2.023
cluster3	3.33249	2.98779	0.876391	0.825756	4.42758	4.56196	4.15746	4.45979	4.00162	4.46659	6.52505	6.84388	4.50696	0.420298	0.403887	1.59157	1.46898	7.04905	7.252	2.40359	6.97895	10.8993	10.6532	14.2484	14.035	4.61701	2.79991	3.21605	5.15903	7.40922	7.09551	28.2002	0.666372	-0.308049	1.71757	1.69884
cluster3	3.23278	3.01301	0.774956	0.792958	4.52352	4.89334	3.95263	5.17049	4.05151	4.45562	6.05527	6.19827	4.23435	0.378969	0.380443	1.47908	1.50578	7.06718	6.58847	2.30088	6.6649	11.1162	10.556	14.1549	13.3222	4.45546	2.83288	3.12204	6.03561	7.07933	6.71984	29.143	0.656942	-0.287835	2.0042	2.15512
cluster5	2.88444	2.75764	0.74843	0.745421	3.97641	4.44929	4.14619	4.43566	3.84653	4.2031	5.47342	5.75406	4.18873	0.304039	0.309783	1.45245	1.45702	6.54548	6.39418	1.7619	5.81188	9.5447	9.71298	12.8985	12.9057	4.09787	2.81249	3.07265	4.73956	6.688	6.5225	28.0859	0.647513	-0.267622	2.10064	2.49
cluster5	3.0358	2.80603	0.77476	0.78304	4.77236	4.68703	4.16309	4.39545	4.04751	4.36598	6.79724	6.99326	4.66169	0.371276	0.345496	1.46227	1.47776	6.53412	6.53305	2.19194	6.65592	10.5106	10.3726	13.9353	12.9062	4.40578	2.80389	3.08606	4.9754	6.60155	6.94319	28.243	0.673444	-0.323209	1.79593	1.77089
cluster4	2.40495	2.35768	0.566676	0.548886	3.29881	3.49741	3.6139	4.12737	3.31797	3.43851	4.58498	4.74695	3.67927	0.293376	0.30271	1.07904	1.03257	5.45188	5.63466	1.73858	5.90832	9.12707	9.30845	11.5163	11.1017	3.68296	2.36526	2.58769	4.10951	5.92872	5.26895	25.9716	0.628654	-0.227195	3.35777	2.04051
cluster5	2.95342	2.80845	0.703986	0.731812	3.94388	4.08555	3.81402	3.88374	3.77817	4.28487	6.01079	6.22105	4.32001	0.338616	0.335077	1.38307	1.42827	6.18078	6.22289	1.95673	5.30707	9.52291	9.08719	11.4218	10.9923	3.47385	2.65684	3.09536	4.4262	6.55711	6.39954	26.1145	0.652227	-0.277729	2.2712	2.67221
cluster5	2.89446	2.58808	0.742782	0.702681	4.01054	4.31337	3.70774	3.99515	3.6352	4.17222	5.49908	5.57926	3.90207	0.367244	0.356528	1.48205	1.35702	6.94882	6.67507	2.16932	6.8856	11.5326	11.0769	14.1521	14.3367	4.30667	2.71571	2.95507	4.38285	7.80056	7.71604	28.1002	0.64987	-0.272675	2.39058	1.80865
cluster5	2.84032	2.64624	0.724771	0.725581	4.43153	4.63502	3.9869	4.40027	3.76628	4.26244	5.52243	5.59701	4.25661	0.321078	0.317308	1.43443	1.50938	7.06718	6.7971	1.89268	5.69124	9.9215	9.59868	12.5111	11.6309	3.86145	3.02637	3.29625	4.63159	7.33697	7.85095	26.0859	0.647513	-0.267622	2.44192	1.92267
cluster5	2.91862	2.78758	0.772733	0.722632	4.1922	4.4799	3.48913	3.94711	3.90438	4.33854	5.47437	5.81241	4.16474	0.315706	0.329867	1.48163	1.46859	6.62413	6.34609	1.78435	5.6823	9.76818	9.73922	12.2659	11.7122	3.75071	2.62229	2.96976	4.38386	7.43539	7.35341	28.1287	0.654585	-0.282782	2.22242	2.51296
cluster3	3.54978	3.30187	0.822065	0.845747	4.7418	4.9574	4.02301	4.42139	3.94518	4.28636	6.64612	6.9658	4.90607	0.375129	0.375066	1.49963	1.57513	7.10566	6.6754	1.95351	5.80726	11.0586	10.5069	13.4279	13.4369	4.08242	2.90931	3.2531	5.20816	7.23719	6.94489	28.3001	0.682873	-0.343422	1.88556	1.98867
cluster3	3.20887	2.99046	0.769133	0.763263	4.08877	4.13616	4.32115	4.62084	3.55521	3.90311	5.56877	5.72859	4.19423	0.306913	0.320398	1.5049	1.61064	6.17464	6.28668	1.72344	5.60185	8.9378	9.21386	11.4898	11.4546	3.77412	2.82313	3.10882	4.84975	7.40699	6.91326	28.2573	0.675801	-0.328262	2.60753	2.84216
cluster3	3.1829	2.95878	0.720408	0.698806	4.37976	5.04372	4.09915	4.21831	3.52618	4.15138	5.78382	6.31161	4.37943	0.319071	0.315057	1.3844	1.37394	6.51794	6.39335	1.5846	5.43042	10.2158	9.7769	12.677	13.0015	3.88568	2.76979	3.18411	4.71765	6.57943	6.78027	29.0859	0.647513	-0.267622	2.26762	2.02655
cluster5	2.79068	2.66622	0.701416	0.727419	4.45771	4.76779	3.90046	4.57828	3.54196	4.13809	5.377	5.58484	4.01398	0.354491	0.34049	1.35102	1.31781	6.61447	6.55803	1.99489	6.40696	10.6444	10.251	12.0866	12.154	4.05551	2.50252	2.88687	3.94994	6.4581	6.48702	27.1002	0.64987	-0.272675	2.27011	1.89501
cluster3	3.05855	2.85326	0.763412	0.797345	4.02004	4.31292	4.32731	4.40239	3.59321	4.41442	5.36375	5.68522	4.23606	0.323069	0.31493	1.41378	1.42858	6.25107	6.24966	1.57376	4.94304	10.793	10.3914	13.038	11.7699	3.45851	2.61609	2.97779	4.45143	7.09242	6.89846	29.2287	0.671086	-0.318155	2.30246	1.89843
cluster3	3.53248	3.31886	0.880214	0.817321	4.58702	4.70365	4.73777	4.76821	4.21712	4.51824	6.42935	6.57264	4.80135	0.350102	0.34662	1.63445	1.47166	7.14665	7.09305	1.92105	5.39056	10.9114	11.0371	12.8156	12.7389	4.1145	2.95637	3.23997	5.28896	7.9131	7.71703	27.2573	0.675801	-0.328262	2.08961	1.93445
cluster5	2.91147	2.70986	0.717953	0.71062	4.04403	4.55406	3.48734	4.32101	3.68906	4.03789	5.19926	5.6279	4.34156	0.319808	0.309157	1.43537	1.44781	6.7361	6.63877	1.82612	5.52257	10.7957	10.5845	13.6437	13.0573	3.40879	2.73672	3.07	4.53973	7.27367	7.25961	29.1002	0.64987	-0.272675	2.45838	2.11363
cluster3	3.45078	3.25109	0.933508	0.894414	4.58203	4.63388	4.01681	4.63349	3.96473	4.44413	5.60746	5.8188	4.11595	0.409809	0.385537	1.78502	1.64359	7.28712	7.14694	2.13242	6.58764	11.2367	10.7175	14.0778	13.5457	4.06546	3.11214	3.47935	5.41671	7.3365	7.87405	28.1716	0.661657	-0.297942	2.30927	2.89183
cluster4	2.56056	2.44203	0.604766	0.595068	3.23715	3.63248	3.54977	4.00877	3.15928	3.56634	5.78541	6.08576	4.58325	0.320067	0.300838	1.1041	1.07785	5.45158	5.23506	1.62632	5.48792	8.19118	8.16374	10.2531	10.0706	3.35064	2.33768	2.71594	3.81777	5.12606	5.10797	27.2002	0.666372	-0.308049	1.93463	2.31136
cluster3	3.04234	2.95041	0.698816	0.777035	4.78268	4.38247	3.83858	4.40069	3.7606	4.36321	5.47109	5.76709	4.13692	0.336363	0.334397	1.31091	1.49355	5.94815	6.38556	1.70661	5.43202	8.91159	10.0431	11.5752	11.7748	3.8088	2.57244	3.06749	4.91273	6.36762	6.85068	29.2287	0.671086	-0.318155	2.11917	2.01008
cluster3	3.22082	3.05037	0.82671	0.868523	4.25364	4.34417	4.30108	4.45939	3.61066	3.94325	5.65387	5.84705	4.51295	0.39497	0.387367	1.56261	1.55537	7.5705	7.59778	2.07381	6.54948	10.9408	10.8329	13.2744	12.3334	4.69927	2.96328	3.35282	4.59365	7.26406	7.20828	27.1002	0.64987	-0.272675	2.38597	2.87935
cluster3	3.10204	2.88837	0.735358	0.724237	3.89508	4.12174	4.0062	4.17358	3.58495	3.89379	5.96566	6.24567	4.51947	0.354579	0.368219	1.35333	1.31442	6.59309	6.18449	1.96187	5.92758	9.6976	9.1972	11.3688	11.3715	3.72385	2.6475	2.93448	4.11374	6.52265	6.21189	29.1145	0.652227	-0.277729	2.1411	1.81888
cluster3	3.19031	2.94757	0.749641	0.78772	3.58149	4.10156	3.93523	4.29859	3.35195	3.76966	5.17386	5.40962	4.43722	0.348409	0.340178	1.49962	1.54014	6.62032	6.63557	2.07411	6.26365	10.23	10.3003	14.1979	12.3556	3.82157	2.73039	3.13981	4.44976	7.30533	7.45842	28.1573	0.659299	-0.292889	2.21585	1.98472
cluster3	3.14559	2.99979	0.784164	0.759608	4.36824	4.62687	4.33982	4.85619	3.57352	4.36737	5.45006	5.84223	4.17004	0.336181	0.326024	1.43887	1.4556	6.73896	6.38275	2.03773	5.87137	10.5307	9.89295	12.2253	12.252	3.91298	2.71152	3.05011	5.0789	6.37847	6.98185	26.2716	0.678158	-0.333315	2.06425	2.09296
cluster5	2.93853	2.59021	0.748287	0.751977	4.59617	4.87021	4.49693	4.89661	4.0634	4.23191	5.14792	5.15753	3.8535	0.345032	0.349344	1.52307	1.45134	7.08911	7.20523	1.83071	6.05465	12.1328	11.4205	14.5845	13.7535	3.89418	2.82515	2.91673	5.58493	8.17945	7.39815	29.2859	0.680516	-0.338369	2.09019	1.81262
cluster5	2.84439	2.77917	0.678351	0.678855	4.39908	4.02661	4.52005	4.40103	3.58094	3.99903	5.32749	5.62069	4.53256	0.326436	0.307302	1.36214	1.38061	6.44786	6.32819	2.00904	5.99427	9.79329	9.44317	12.1542	11.3885	4.27736	2.66711	3.16758	4.50578	6.9408	7.18535	26.143	0.656942	-0.287835	2.78062	2.75709
cluster4	2.83168	2.53515	0.682757	0.627449	3.83539	4.17645	3.84673	4.08653	3.52724	3.89935	4.53914	4.77736	3.92692	0.317584	0.310574	1.26523	1.16403	6.2196	5.8938	1.53487	5.08281	9.01042	8.95867	10.8249	11.7728	3.30222	2.52593	2.82772	4.33654	6.30593	5.69375	27.9573	0.626296	-0.222142	2.87631	3.57771
cluster3	3.09829	2.81777	0.797896	0.793834	5.21376	4.97759	4.82451	4.86809	4.33333	5.00281	6.42688	6.55061	4.61477	0.387433	0.39767	1.54949	1.54624	6.98784	6.55933	2.25676	6.25568	10.606	10.6157	12.5264	11.5653	4.1894	2.98962	3.18781	5.82773	6.8535	6.44024	28.2573	0.675801	-0.328262	2.19559	2.12552
cluster5	2.95743	2.78934	0.703657	0.725738	3.99187	4.64362	3.74656	4.38384	3.61131	4.19159	5.33975	5.55892	4.05013	0.317929	0.297083	1.38251	1.39357	6.25683	6.20576	1.77464	5.55017	10.2154	10.1917	12.69	11.852	3.64794	2.49117	2.91604	4.52858	7.05989	6.68514	26.1573	0.659299	-0.292889	2.54613	2.01502
cluster3	3.34812	3.13019	0.860096	0.868483	4.4454	4.8511	3.91947	4.41725	4.07663	4.28713	6.59206	6.93721	5.09866	0.431671	0.421631	1.61072	1.63192	7.04791	7.34245	2.16458	6.63674	10.1214	11.3526	12.058	11.6524	4.8369	2.94634	3.28695	5.13894	7.38283	7.60342	29.2144	0.668729	-0.313102	1.85102	2.58001
cluster5	3.01967	2.76409	0.689551	0.693988	4.52157	4.6252	4.41779	4.51087	3.91298	4.39326	5.44401	5.52997	4.08699	0.329049	0.331117	1.32566	1.4199	6.55432	6.25523	1.89145	5.59112	10.0368	10.8306	12.0916	12.1931	3.93339	2.83081	3.06309	5.13149	6.33663	6.47815	27.0288	0.638083	-0.247408	2.55175	2.23708
cluster5	2.81752	2.59416	0.678023	0.742528	3.87094	3.9586	3.86339	4.04752	3.43888	3.84593	4.65921	5.09475	4.35452	0.289698	0.294022	1.29142	1.41034	5.73038	5.52528	1.5004	5.00477	9.0497	8.8204	11.0435	10.9582	3.41672	2.51125	2.92284	3.76017	6.64162	7.11725	27.9859	0.631011	-0.232248	2.51371	2.09452
cluster3	3.20152	3.09912	0.771133	0.794904	3.87212	4.40986	3.79296	4.23645	3.76097	4.31947	6.02768	6.23136	4.39448	0.335186	0.326971	1.53153	1.59774	6.6267	6.58364	1.95979	5.18627	10.7305	10.5283	12.906	12.4396	3.63754	2.86999	3.40874	4.53164	7.6949	8.17455	29.2287	0.671086	-0.318155	1.77845	2.47645
cluster3	3.18066	2.97179	0.795593	0.805697	4.03116	4.01118	3.89306	4.15014	3.69647	4.06806	5.6129	5.79091	4.03736	0.311551	0.329878	1.51851	1.54814	7.57982	7.35379	1.71117	5.40231	11.221	10.5749	12.6534	12.0723	3.73264	2.95402	3.23951	4.52897	7.69071	7.72136	26.1573	0.659299	-0.292889	1.99823	2.45886
cluster3	3.1116	2.89685	0.833502	0.810942	4.41363	4.36532	4.09592	4.71965	3.98016	4.19679	5.76222	5.60787	3.84641	0.405705	0.401275	1.5319	1.55383	6.87322	7.34764	2.15705	6.42332	11.7253	11.2885	14.8101	13.0273	4.36819	2.92504	3.30215	4.46985	8.36155	7.42331	26.0573	0.642798	-0.257515	2.04367	1.46843
cluster3	3.08087	3.02785	0.823373	0.828394	4.35523	4.7625	4.39208	4.61779	4.12505	4.55835	5.7872	5.91335	4.30952	0.417022	0.416413	1.51827	1.55175	7.07292	6.826	2.27853	6.04722	11.4468	10.7008	14.2958	13.0759	4.15066	2.85408	3.28885	4.81277	7.49938	7.10704	26.1859	0.664014	-0.302995	2.00542	1.756
cluster3	3.21333	3.00522	0.722136	0.719227	4.17925	4.47677	4.1737	4.36074	3.80386	4.21294	5.26208	5.61456	4.17555	0.287868	0.288832	1.38047	1.39263	6.21848	5.78637	1.7571	5.51587	9.37908	9.44295	12.1601	12.5128	3.47757	2.70587	3.13286	4.32619	6.89858	6.78076	24.043	0.640441	-0.252462	2.41447	1.81995
cluster5	2.84622	2.76823	0.744879	0.746146	3.3869	3.61946	3.48313	3.68252	3.21361	3.59492	5.01534	5.31706	4.33746	0.340753	0.347074	1.42129	1.41021	6.21059	6.04214	1.62014	6.48041	10.4204	9.9708	12.0609	10.9344	3.8783	2.72568	2.96235	3.79896	6.71952	6.27091	25.0573	0.642798	-0.257515	2.56297	2.01644
cluster3	3.20119	3.12687	0.884072	0.90805	4.7283	4.81677	4.40642	4.802	4.07908	4.69	6.28275	6.47683	4.57222	0.392889	0.397319	1.73192	1.80671	6.82297	6.4515	2.23172	6.94191	10.7689	10.272	13.14	13.296	4.31924	2.8684	3.24243	5.10959	7.93719	7.89416	29.243	0.673444	-0.323209	1.7189	1.89721
cluster3	3.05492	2.91	0.73069	0.720239	4.08232	3.89618	4.05195	4.42064	3.45152	4.03249	5.54305	5.99422	4.62468	0.304014	0.312658	1.45438	1.45002	6.73188	6.6629	1.77331	6.08715	9.68416	10.0518	12.2037	11.7551	3.88172	2.8147	3.1467	4.4993	6.94057	7.16764	27.1287	0.654585	-0.282782	2.75763	2.78989
cluster3	3.25302	3.14384	0.84873	0.874471	4.75751	4.76982	4.21953	4.55445	3.95828	4.46622	6.38984	6.60388	4.6887	0.430185	0.430648	1.59482	1.56965	7.48229	7.5564	2.12957	6.40064	11.6693	11.1338	13.752	11.8904	4.51934	2.92614	3.36118	5.16862	7.45896	7.4076	28.1859	0.664014	-0.302995	1.88407	1.78903
cluster3	3.14923	2.98184	0.756129	0.76393	4.9992	5.06947	4.56981	4.847	4.1604	4.65432	6.38629	6.82238	4.51276	0.346065	0.354273	1.43295	1.40927	7.29853	7.23931	2.08943	5.79282	10.3851	10.7344	13.2857	12.7634	3.57442	2.80618	3.14578	5.43592	7.10142	7.24955	29.143	0.656942	-0.287835	1.74643	2.14538
cluster3	2.82046	2.8383	0.673931	0.724447	4.15771	4.43673	4.19987	4.08884	3.90599	4.44125	5.41995	5.50683	4.24704	0.375554	0.380472	1.26914	1.39226	6.68923	6.54888	2.01946	5.25895	9.97237	9.62896	11.4903	10.8863	3.8741	2.69596	3.28662	4.27251	6.27325	7.09043	26.9288	0.621582	-0.212035	2.26306	1.86583
cluster5	3.13837	2.78056	0.844983	0.820534	4.14689	4.29774	4.36644	4.49616	4.09436	4.49715	6.05839	5.99458	4.41042	0.41998	0.401193	1.59659	1.60198	7.04489	7.06285	2.16265	6.16326	10.5733	10.863	13.142	12.9719	4.07452	2.90929	3.36293	4.79661	7.63144	7.38288	27.1573	0.659299	-0.292889	1.76642	2.04848
cluster5	2.96375	2.74482	0.728299	0.706598	4.62173	5.00752	4.48889	4.57966	3.85151	4.32114	5.8658	6.08047	4.34181	0.34451	0.342759	1.47662	1.36092	6.467	6.55784	1.89238	5.73452	9.7389	9.88947	12.5409	11.9587	3.68854	2.87446	2.92431	4.93428	7.19473	6.79372	29.1145	0.652227	-0.277729	2.34954	2.01871
cluster5	2.83991	2.72132	0.695133	0.719542	3.85645	4.23252	3.82844	4.29636	3.73867	4.14123	5.35494	5.49575	4.1891	0.347721	0.345659	1.455	1.43238	7.1306	6.97628	1.94347	5.71462	10.8584	10.3192	11.6681	11.6223	3.80292	2.76175	3.07974	4.53841	6.96013	6.84788	27.1573	0.659299	-0.292889	2.47994	2.06186
cluster3	2.59411	2.88906	0.692275	0.787536	4.21899	4.7163	3.9196	4.24263	3.44677	3.96056	6.35993	6.96237	4.76142	0.325674	0.324886	1.38408	1.5558	6.15693	6.37093	1.84722	5.74289	9.12629	9.24792	11.7423	11.0035	3.73157	2.57731	2.97208	4.31794	6.43488	6.73019	27.2573	0.675801	-0.328262	1.82096	1.856
cluster3	3.08998	2.87351	0.769352	0.802776	4.13605	4.37914	3.71689	4.27624	3.686	3.79007	5.37194	5.43944	4.44774	0.383754	0.380096	1.50969	1.56958	6.92557	6.6435	1.83958	5.17992	9.94867	9.88606	10.9034	11.0194	3.80929	2.9425	3.31562	4.40631	7.23445	6.81979	26.9716	0.628654	-0.227195	2.69132	2.52557
cluster5	2.97344	2.757	0.755881	0.753031	3.89416	4.4111	3.97466	4.52198	3.9527	4.32107	5.39252	5.50382	4.05332	0.363798	0.358802	1.44336	1.37101	6.09688	6.43474	1.96477	6.19638	10.1363	10.4556	12.3625	11.1103	4.02001	2.6867	3.04587	5.15354	7.06818	6.87952	28.0573	0.642798	-0.257515	2.29498	2.03423
cluster3	3.22667	2.99725	0.800861	0.769271	4.43891	4.67911	4.38627	4.41034	3.97799	4.25039	6.43325	7.00011	4.56821	0.326159	0.341688	1.37138	1.32113	6.83083	6.70103	1.52811	5.67286	10.3894	10.3763	12.4468	12.9323	3.62894	2.65922	3.10684	4.99737	7.04705	6.72401	23.1573	0.659299	-0.292889	2.17776	2.09041
cluster5	2.8261	2.57435	0.700353	0.710256	4.23062	4.38131	3.8475	4.21451	3.43522	3.77598	5.50942	5.7458	4.2043	0.316102	0.330513	1.35998	1.38765	6.05313	5.99971	1.5916	4.99746	9.73207	9.38302	12.1397	11.4387	3.33634	2.69919	2.9212	4.57124	7.01949	6.33336	27.0716	0.645155	-0.262569	2.12214	2.0081
cluster3	2.98921	2.93913	0.656109	0.709833	4.18829	4.18969	3.92544	4.30424	3.80737	4.27674	5.0214	5.06655	3.97282	0.324504	0.300913	1.24072	1.43858	6.05149	5.70166	1.62483	4.96824	8.86206	9.2048	12.0733	11.0968	3.46409	2.5455	3.01698	4.33394	6.47048	6.65982	28.0716	0.645155	-0.262569	2.88929	2.04653
cluster2	2.18998	2.18068	0.59556	0.596113	3.73451	4.03876	3.67538	3.58412	3.2415	3.79624	3.70195	3.78375	3.53899	0.270671	0.28244	1.09253	1.11317	5.48967	4.83074	1.34775	4.83239	8.60215	8.16157	10.1355	10.0879	2.97849	2.09082	2.57542	3.58655	6.35436	6.50068	26.8431	0.607437	-0.181715	3.42511	2.55961
cluster5	2.93772	2.80886	0.711682	0.727578	3.85031	4.21689	4.14302	4.50886	3.70498	4.13365	5.43667	5.50392	4.19382	0.295013	0.301209	1.45079	1.52855	6.62039	6.32574	1.82543	6.12554	9.87226	10.6672	12.8959	12.7805	4.07476	2.83684	3.21035	3.92093	6.76377	7.45423	29.0288	0.638083	-0.247408	2.42072	1.80272
cluster5	2.86817	2.71475	0.684004	0.676255	3.68089	4.46392	3.82322	3.98092	3.32867	3.78023	5.21104	5.72898	4.57212	0.321332	0.325763	1.30615	1.29751	5.79469	5.8695	1.68541	5.21219	8.93966	8.50097	10.9201	10.1235	3.16657	2.59322	3.00217	4.57813	6.25498	6.19919	28.043	0.640441	-0.252462	2.87752	2.04861
cluster5	2.8963	2.64422	0.690678	0.690638	3.85547	4.19963	3.5535	4.30203	4.00328	4.36871	4.78769	4.86806	4.08214	0.305648	0.298081	1.44539	1.40517	6.61496	6.19344	1.63794	5.33379	10.2439	9.62909	12.33	12.1339	3.36332	2.72812	2.96923	4.58013	6.77904	6.40382	27.0145	0.635726	-0.242355	2.55676	2.14282
cluster5	2.74859	2.68206	0.61259	0.680872	3.98977	3.85763	3.90225	3.79787	3.17826	3.48055	4.93168	5.07709	4.35704	0.288332	0.280263	1.16177	1.31979	5.30399	5.50312	1.61048	4.92035	7.45308	8.15637	8.36647	9.41102	3.09498	2.47369	2.88541	4.00601	6.43164	6.47719	27.0288	0.638083	-0.247408	2.91753	1.96831
cluster5	2.68141	2.5784	0.676102	0.684677	3.79572	4.28421	3.49776	3.92499	3.23103	3.97669	5.03005	5.52965	4.2116	0.282905	0.296191	1.36841	1.33203	6.35111	6.17536	1.58019	5.19425	9.95736	9.27006	11.0188	11.4148	3.29745	2.67936	2.93605	4.08004	7.10601	6.74061	26.1002	0.64987	-0.272675	2.48702	1.99379
cluster3	3.25674	3.02453	0.770408	0.79678	4.23149	4.18634	4.65268	4.67034	3.86799	4.18166	4.90079	5.05661	4.27865	0.373751	0.367502	1.49371	1.55325	7.13963	7.06689	2.12456	5.7799	11.0897	10.3633	12.8275	11.6042	3.94202	3.01011	3.61987	5.14679	6.81625	7.40188	28.9431	0.623939	-0.217088	2.6136	2.42303
cluster3	2.97999	2.85725	0.753801	0.775729	4.17656	4.60415	4.17241	4.51743	3.97008	4.21588	5.26076	5.51779	4.53781	0.405865	0.370351	1.43608	1.44106	6.36967	6.2071	1.83079	5.79579	9.80182	10.2675	11.494	11.8343	3.5961	2.8183	3.14	5.01334	6.52037	6.25638	27.9145	0.619224	-0.206982	2.74854	3.00235
cluster3	3.60147	3.25216	0.888913	0.860835	3.89205	4.14379	3.87329	4.37919	4.06486	4.13054	5.57347	5.65106	3.96538	0.450109	0.421057	1.64094	1.6232	7.1259	7.24569	2.07209	6.78808	11.302	11.416	14.9686	14.2294	4.30911	2.94443	3.29574	5.65671	7.67721	7.1122	28.3001	0.682873	-0.343422	2.02008	1.77355
cluster3	3.10002	2.97601	0.860344	0.844621	4.14928	4.48162	3.95053	4.45109	4.07981	4.451	5.27522	5.4108	4.17885	0.389699	0.390297	1.59371	1.66256	7.24713	7.26255	2.01838	6.6536	11.3379	11.6226	13.4151	14.229	4.47214	2.92158	3.42431	5.00324	7.05082	7.68139	24.0573	0.642798	-0.257515	2.24329	2.2798
cluster3	2.98229	2.90697	0.810916	0.828948	3.55367	3.78593	3.6598	4.19614	3.51756	3.8659	5.61612	5.80973	4.12159	0.366544	0.376025	1.51486	1.53169	6.37538	6.70307	2.11386	6.70804	10.8557	11.2932	12.9317	12.0246	4.44804	2.74031	3.02815	4.64791	7.04214	6.73411	29.2573	0.675801	-0.328262	1.75425	2.07903
cluster5	2.79468	2.64615	0.737971	0.754979	4.18997	4.29246	3.90246	4.40935	3.70552	4.25815	5.43974	5.79686	4.32414	0.38652	0.358545	1.45356	1.49834	7.12017	6.55224	2.03769	5.79123	10.9106	10.8408	13.2918	13.6178	4.00565	2.78896	3.17439	4.42119	6.73322	7.08325	26.0716	0.645155	-0.262569	2.61453	2.02298
cluster3	3.22754	2.97917	0.72661	0.749749	4.21532	4.17226	3.42114	4.23814	3.31857	3.95862	6.07495	6.26221	4.58528	0.346104	0.353533	1.41483	1.44999	6.74005	6.87387	1.91265	5.91055	10.7675	10.6021	13.7179	12.2115	3.95239	2.77704	3.3131	4.34408	6.78762	6.82886	29.1002	0.64987	-0.272675	2.31153	2.2791
cluster5	3.02238	2.66912	0.778119	0.720069	4.08785	4.55205	3.56586	4.19944	3.67462	3.92277	5.56053	5.67852	3.9458	0.354923	0.346768	1.58746	1.3769	6.46582	6.58681	1.83978	6.06394	10.1538	10.599	12.2271	11.3245	3.82867	2.78337	2.88549	4.04656	6.85191	6.41408	28.2287	0.671086	-0.318155	1.73263	1.93452
cluster5	2.8134	2.68686	0.693433	0.739249	3.86474	4.03193	3.48674	3.9233	3.42448	3.98391	4.9352	5.08391	3.97517	0.296232	0.298469	1.31584	1.42803	6.18821	5.72533	1.54142	4.6114	9.54221	9.18179	11.5337	11.2073	3.09271	2.40227	2.76826	4.11328	6.16965	6.53515	28.1573	0.659299	-0.292889	2.52317	2.52829
cluster3	3.59761	3.21431	0.910576	0.885942	4.30039	4.68392	4.18424	4.54863	3.85283	4.24155	6.07213	6.12706	4.26582	0.386632	0.386299	1.72558	1.6951	7.65649	7.21036	2.04759	6.01899	11.5169	11.4476	14.3008	13.5076	4.42697	3.08808	3.39418	5.02564	7.75566	7.87645	28.2573	0.675801	-0.328262	2.71309	2.76704
cluster3	3.70539	3.46446	0.93601	1.00507	4.22359	4.48807	3.67137	4.68206	3.99235	4.41212	6.67029	6.83157	4.7092	0.426524	0.423903	1.80536	1.899	7.53284	7.55497	2.18895	6.02348	11.5118	10.9557	13.9814	12.726	4.33525	3.12168	3.41859	4.98181	8.33107	8.2515	29.3001	0.682873	-0.343422	1.66379	1.87189
cluster3	3.31192	3.06246	0.876137	0.864054	4.35686	4.27514	3.87117	4.04959	4.04937	4.36647	5.95811	6.09017	4.35576	0.384285	0.396628	1.68042	1.66576	7.56185	7.20055	1.99072	6.19827	11.8055	10.9843	14.28	13.4258	4.0032	3.13284	3.38059	4.916	7.33225	7.56328	28.243	0.673444	-0.323209	1.77892	1.67346
cluster4	2.63962	2.41222	0.645894	0.629139	3.99679	4.19282	3.62706	3.69253	3.42769	3.6748	4.52746	4.57899	3.6402	0.318345	0.319789	1.19539	1.1937	6.11558	6.08044	1.54157	4.83727	8.57168	8.87184	11.0894	10.6905	3.28848	2.61318	2.76126	3.85233	5.96185	5.73053	27.0145	0.635726	-0.242355	3.80325	3.32795
cluster3	2.88978	2.83886	0.777667	0.769158	4.63066	4.74961	4.0845	4.37279	4.17684	4.27079	6.24304	6.61708	4.61557	0.349365	0.339745	1.5327	1.57656	6.74392	6.76305	1.97119	6.54354	10.7005	11.0691	13.6863	13.898	4.05163	2.75691	3.14673	4.72522	7.86649	7.41036	26.3001	0.682873	-0.343422	1.67329	1.90245
cluster3	3.03059	2.93681	0.747673	0.782056	3.91707	3.85264	3.78415	4.1031	3.76537	4.13882	6.25164	6.45403	4.55652	0.412507	0.410358	1.48913	1.55129	7.05416	6.82279	2.10635	6.19842	10.9361	10.542	12.9884	12.0977	4.24572	2.78262	3.20166	4.62362	7.50315	7.64654	27.1002	0.64987	-0.272675	1.8973	2.0343
cluster3	2.99761	2.80373	0.799665	0.83378	3.80923	3.91149	3.83006	4.22777	3.37187	3.836	5.27684	5.35829	4.35403	0.373624	0.360761	1.47211	1.54414	6.51877	6.11948	1.92955	5.25038	10.3709	9.86393	11.8804	11.974	3.54373	2.53225	3.02731	4.71499	6.43925	7.05639	29.0002	0.633368	-0.237302	2.57248	2.17974
cluster5	2.82581	2.64457	0.675417	0.674328	4.17768	4.5129	3.40179	3.8972	3.62626	3.9694	5.41784	5.73005	4.17987	0.302534	0.301277	1.40468	1.3506	6.21334	5.88185	1.6161	5.35966	9.48144	9.25521	12.1984	10.9029	3.50662	2.78133	2.85846	3.85719	6.92903	6.73871	28.1002	0.64987	-0.272675	2.06237	2.05404
cluster3	3.08467	2.90107	0.757663	0.771451	4.9493	4.83773	4.47115	4.84378	3.98922	4.52348	6.24206	6.45733	4.75164	0.369837	0.345902	1.40794	1.47847	6.76183	6.7727	1.96527	6.20215	10.3188	10.2802	12.9981	12.1843	4.26107	2.68236	3.07031	5.07056	7.08298	7.84951	28.3001	0.682873	-0.343422	2.34296	2.58185
cluster3	3.11267	2.96931	0.710914	0.75312	3.71445	4.03163	3.50506	4.07078	3.38378	3.76769	4.90699	5.21922	4.00625	0.318039	0.310002	1.3517	1.36609	6.94533	6.38271	1.65384	5.3764	9.30375	9.31217	11.205	11.9864	3.83816	2.78955	3.11584	4.07241	6.10917	6.64647	28.0859	0.647513	-0.267622	2.57664	2.95503
cluster5	2.7997	2.60951	0.689132	0.681501	4.18445	4.28544	4.1331	4.2788	3.58205	3.94326	5.71997	5.85844	4.32289	0.330485	0.318285	1.41532	1.31916	6.36177	6.124	1.73128	5.38337	10.1668	9.54674	12.1982	11.6038	3.44428	2.5191	2.78826	4.3561	6.84149	6.22549	29.1002	0.64987	-0.272675	1.99728	1.90603
cluster5	2.97412	2.76982	0.77397	0.745749	4.35448	4.5587	4.20591	4.66518	3.86837	4.06719	5.8329	5.92392	4.22056	0.39962	0.403442	1.63385	1.58208	7.18832	7.2127	2.18188	6.41221	12.2523	11.1615	15.0049	14.4913	4.21214	2.94113	3.25563	5.23906	7.58986	7.75096	29.2287	0.671086	-0.318155	1.78313	1.85813
cluster3	3.00623	2.85	0.739392	0.759417	4.26072	4.2729	3.63834	3.96236	3.6738	4.01732	5.5284	5.62915	4.46404	0.358203	0.368685	1.49775	1.49302	7.0278	6.72436	1.81561	6.18499	10.8605	10.4306	12.2583	12.214	4.56546	2.92995	3.31247	4.53679	7.06111	6.91383	29.0288	0.638083	-0.247408	2.6382	2.16814
cluster5	2.7465	2.6509	0.677173	0.688583	3.99649	3.93333	3.84312	3.87721	3.36582	3.9014	4.8496	5.02612	4.25265	0.289898	0.288152	1.46311	1.48195	6.84758	6.20263	1.56688	5.91299	9.83486	9.47773	11.5881	10.9735	3.85458	2.78043	3.1023	4.11242	6.17937	6.55558	25.9859	0.631011	-0.232248	3.23209	2.85342
cluster3	2.98048	2.90081	0.80878	0.788129	4.22538	4.14437	3.93492	4.12262	4.03536	4.36518	5.64918	5.71763	4.45927	0.369085	0.362628	1.49696	1.41861	7.07679	7.06342	1.9401	6.70728	11.6288	11.4312	12.7185	12.6719	4.18617	2.65306	2.94343	4.56144	7.20473	7.18706	28.243	0.673444	-0.323209	2.09179	2.44274
cluster3	3.40089	3.20672	0.880229	0.90102	4.66027	4.69311	3.83953	4.65065	4.19408	4.6268	6.41159	6.55359	4.70055	0.438385	0.439446	1.64116	1.72378	7.1961	7.11058	2.23542	6.15106	11.0388	10.6993	12.9791	13.3289	4.24602	3.01614	3.44742	5.24695	7.55738	7.44002	27.1859	0.664014	-0.302995	1.95945	2.15708
cluster2	2.47157	2.31829	0.56643	0.558284	3.29375	3.74246	3.28857	3.75269	3.61759	3.98992	3.86202	4.10601	3.74555	0.280117	0.282694	1.1338	1.09317	5.46414	5.19051	1.37735	5.10786	8.28211	8.12224	9.95728	10.4064	3.34807	2.29147	2.74073	3.66406	6.01381	6.18328	27.9716	0.628654	-0.227195	3.77917	2.74129
cluster3	3.20579	2.90994	0.729373	0.719128	4.59795	4.79678	4.20761	4.17554	3.99438	4.36512	5.41374	5.76987	4.29832	0.298792	0.31276	1.39553	1.29363	5.8113	5.7479	1.89438	5.86217	9.55073	8.92429	12.1334	11.7915	3.69268	2.76407	2.98555	4.21186	6.56178	6.10454	29.0859	0.647513	-0.267622	2.8171	2.31038
cluster4	2.58999	2.38889	0.535242	0.520322	3.28177	3.82803	4.03385	4.09829	3.28411	3.49586	4.65043	4.83331	4.21568	0.334803	0.346351	1.07562	1.07246	5.79625	5.64497	1.74524	5.23595	8.29775	7.86214	9.40565	7.98064	3.53719	2.33671	2.75724	3.49217	5.78025	5.80608	25.0145	0.635726	-0.242355	2.34557	2.69505
cluster5	3.00762	2.71774	0.722289	0.702221	4.62492	4.30845	4.26099	4.34897	4.0635	4.49546	6.19497	6.66558	4.49295	0.307697	0.301424	1.38935	1.3308	6.31722	5.60329	1.94052	5.47279	10.2249	9.8666	12.5225	12.6374	3.59223	2.46998	2.70511	5.3739	7.12735	6.81644	28.3001	0.682873	-0.343422	1.7414	1.83796
cluster3	3.27023	2.99368	0.835951	0.767905	4.40059	4.58092	4.2987	4.57784	3.84416	4.16008	5.82184	6.4231	4.46748	0.372803	0.364416	1.59513	1.47031	7.44998	7.00435	1.72423	6.24175	10.7568	10.3942	13.1996	13.1008	4.42573	3.05823	3.2511	5.00739	8.29502	7.39549	29.2859	0.680516	-0.338369	1.65966	1.51208
cluster3	3.20704	2.99705	0.786154	0.783751	4.51415	4.4075	3.9607	4.03145	3.71875	4.05397	5.67443	5.42517	4.41558	0.313277	0.324121	1.5147	1.48469	6.814	6.24014	1.77081	4.99295	9.84702	9.5304	10.7195	10.5895	3.77223	2.90219	3.31203	4.55715	7.20914	6.79426	28.043	0.640441	-0.252462	2.80956	2.17383
cluster3	2.92683	2.89737	0.73049	0.752773	3.76525	3.93921	3.96296	4.33776	3.43047	3.79933	5.34786	5.67524	4.16676	0.350136	0.345927	1.43379	1.50532	6.85855	6.70396	2.08102	6.22962	10.4095	10.7778	12.5965	12.9012	4.05635	2.69861	3.22909	4.99691	6.55363	6.84386	28.1573	0.659299	-0.292889	1.87863	1.63419
cluster3	3.30887	3.14308	0.836941	0.828444	4.0307	4.2286	3.74967	3.89286	3.38783	3.99365	6.34757	6.52394	4.6198	0.363002	0.359584	1.57736	1.47073	6.87784	6.8206	1.7725	7.00879	10.9649	10.6148	13.4321	12.7247	4.63091	2.72226	3.0502	4.51793	7.27442	6.71582	27.2287	0.671086	-0.318155	1.70046	2.09264
cluster5	2.93694	2.70245	0.713621	0.730613	4.46408	4.44248	4.50539	4.63245	4.13176	4.31009	5.80923	5.88412	4.37833	0.39399	0.387158	1.49187	1.39816	6.75039	6.60094	1.98238	6.02123	10.138	10.2568	12.1886	10.8943	4.31828	2.79776	2.94002	5.24316	7.43968	7.0918	29.1716	0.661657	-0.297942	2.56821	2.25405
cluster5	2.97889	2.82038	0.726582	0.707379	4.09775	4.08619	4.00034	4.21148	3.93863	4.59095	5.73919	6.10111	4.38204	0.342408	0.338481	1.31246	1.28823	6.40343	5.99329	1.68717	5.74408	9.78643	8.90945	11.2037	11.0978	3.61399	2.55707	2.90696	4.10997	6.59133	6.44657	26.043	0.640441	-0.252462	2.4325	2.19222
cluster3	3.09797	2.89558	0.767012	0.78651	4.14763	3.97194	4.37388	4.37695	3.60494	3.88643	5.766	5.92243	4.35221	0.320204	0.310711	1.43602	1.41641	6.44796	6.43366	1.5822	5.76755	10.0103	9.85363	11.916	11.9973	3.1589	2.61787	2.96454	4.9137	6.53132	6.48603	27.0288	0.638083	-0.247408	2.25014	2.02258
cluster3	3.16319	3.07039	0.791926	0.823668	4.47517	4.64878	4.07601	4.17628	4.06062	4.58391	6.25304	6.49904	4.35504	0.354904	0.348477	1.52399	1.47915	6.86549	6.92479	1.89767	6.43958	11.3137	11.2875	15.2083	14.7098	4.12094	2.89696	3.20913	5.08173	7.71489	7.37215	28.2859	0.680516	-0.338369	1.74829	1.98654
cluster3	3.10883	2.86481	0.760237	0.744091	4.43359	4.58153	4.05022	4.50048	3.77695	4.1578	5.63422	6.02164	3.98831	0.3767	0.35221	1.42621	1.27774	6.82694	6.33065	1.88046	5.93751	10.5141	9.24086	12.0961	11.6753	3.92671	2.77994	2.89734	4.99209	7.4005	6.15645	25.2573	0.675801	-0.328262	2.00825	1.79798
cluster3	3.24536	3.07832	0.85399	0.875823	4.68786	5.02079	4.03859	4.60037	4.38367	4.75258	6.90565	7.21885	4.88624	0.441694	0.447634	1.54379	1.63863	7.68438	7.45172	2.20394	6.21695	11.502	11.0665	13.8155	13.7145	4.51511	2.9134	3.32571	5.71482	8.26988	7.68235	29.2859	0.680516	-0.338369	1.71194	1.907
cluster3	3.25851	3.01687	0.85535	0.844565	4.22124	4.68374	3.98273	4.69841	3.92349	4.31515	5.96868	6.1711	4.4764	0.391825	0.389376	1.67996	1.61617	7.991	7.58467	2.11951	6.71131	12.4825	11.9522	14.7032	14.606	4.20411	3.17003	3.31818	5.06826	7.75279	7.65313	29.2859	0.680516	-0.338369	1.81039	1.97693
cluster5	2.80802	2.64001	0.672424	0.651117	4.2371	4.22779	3.89881	4.22433	3.66125	4.05283	5.27604	5.6867	4.19153	0.300401	0.298888	1.4236	1.33135	6.31428	6.01535	1.68379	5.51037	9.17205	8.73636	10.8729	10.5228	3.60236	2.62837	2.87887	4.43078	6.87076	6.70342	29.0145	0.635726	-0.242355	2.70185	2.29218
cluster4	2.8624	2.4648	0.631797	0.615846	3.49699	3.70599	3.45256	3.84745	3.26381	3.72468	4.95991	5.01071	3.86678	0.282389	0.278872	1.26341	1.1975	5.96458	5.96121	1.48115	4.50123	8.19705	8.35426	10.1853	9.59894	3.79457	2.46498	2.88768	3.9821	6.38557	6.21467	26.9431	0.623939	-0.217088	2.78824	3.04137
cluster3	3.37168	3.04539	0.807632	0.802595	4.30657	4.81257	3.83644	4.36934	3.86639	4.3118	5.85971	6.05697	4.21079	0.365056	0.367891	1.53559	1.45553	7.30513	6.95206	1.95796	5.92869	11.7384	11.1679	14.288	13.0481	3.78902	2.93973	3.24783	4.85342	7.54924	7.51282	28.0859	0.647513	-0.267622	2.71338	2.07984
cluster3	3.57619	3.37617	0.933802	0.972687	4.84095	5.00301	4.24377	4.5399	4.22321	4.45477	6.84759	7.20594	4.69987	0.442043	0.451289	1.7768	1.8189	7.09185	7.14737	2.03063	5.69111	10.4384	10.8822	13.7268	12.9748	3.89923	3.06879	3.43642	5.60581	7.87206	7.7056	29.243	0.673444	-0.323209	1.66347	1.89758
cluster3	3.01219	2.93869	0.781863	0.782933	4.61032	4.64273	4.03686	4.78298	3.78661	4.46416	5.39861	5.72108	4.08277	0.352922	0.349942	1.50263	1.49766	6.46581	6.31752	1.91695	5.87424	10.3742	9.91657	12.7635	12.7316	3.80647	2.70319	3.10121	4.73206	7.38657	7.47858	26.1002	0.64987	-0.272675	2.59208	2.6531
cluster5	2.87834	2.77948	0.681873	0.749548	3.90064	4.16086	3.70576	3.86382	3.54173	4.11778	5.52563	5.7603	4.22377	0.357465	0.351898	1.38725	1.47429	6.38911	5.91934	1.79558	4.7622	9.48589	9.17257	11.8639	11.0716	3.35009	2.6043	2.955	4.29616	6.67909	7.08869	26.0573	0.642798	-0.257515	2.01049	1.93361
cluster5	2.95076	2.81566	0.733221	0.747888	4.22713	4.36902	4.35005	4.33901	3.46917	3.99323	5.35442	5.6725	4.3006	0.331353	0.321493	1.39682	1.4165	6.14075	5.66204	1.88857	5.09015	9.68054	9.16353	11.8213	11.2246	3.24978	2.59193	2.88099	4.57873	6.53143	6.52173	28.0716	0.645155	-0.262569	2.46716	2.38626
cluster3	2.93906	2.92625	0.729993	0.705336	3.64054	4.09662	3.74029	4.3423	3.61118	4.02997	5.0956	5.40951	3.92391	0.300296	0.306959	1.43648	1.35417	5.94783	6.30182	1.86798	5.68379	9.26966	9.10302	11.8177	11.0699	3.71128	2.54998	2.84664	4.39202	6.67611	6.58471	28.1145	0.652227	-0.277729	2.07143	1.97684
cluster3	2.93119	2.9774	0.724546	0.75302	4.2067	4.49604	3.97879	4.30686	3.67378	4.20401	5.55537	5.92999	4.07685	0.346867	0.3473	1.37609	1.37656	6.80786	7.19671	1.65697	5.99831	9.85199	10.1481	12.3098	11.9832	4.04852	2.72992	3.23904	4.90692	6.6025	6.82224	27.143	0.656942	-0.287835	2.22591	2.59242
cluster5	3.00072	2.78788	0.785658	0.807851	4.74764	4.74517	4.45651	4.71526	3.8672	4.33298	6.24292	6.46713	4.53344	0.358125	0.361529	1.49646	1.60004	6.94875	7.1547	1.9115	5.52079	10.4436	10.4675	13.4912	13.2093	3.72356	2.80514	3.19144	5.22199	7.2976	8.05664	29.143	0.656942	-0.287835	2.2687	1.95155
cluster5	2.72903	2.63317	0.694372	0.746484	4.2824	4.45722	3.98268	4.26122	3.68538	4.24599	5.81539	6.27412	4.21754	0.340962	0.372482	1.37046	1.42585	6.93341	6.82354	2.01041	5.81368	9.28682	9.76613	11.4062	11.9127	4.07893	2.80965	3.25725	4.81108	7.20634	7.14821	28.1716	0.661657	-0.297942	2.36159	2.52611
cluster5	2.8547	2.73691	0.694011	0.677748	4.23049	4.244	4.3437	4.44827	3.49282	4.20887	5.60682	6.01659	4.07868	0.345804	0.336395	1.36414	1.26719	6.23345	5.81555	1.79708	5.4486	9.14146	8.7274	10.7218	10.6473	3.74838	2.50609	2.84642	4.687	6.42818	6.35542	27.2287	0.671086	-0.318155	1.90521	1.95927
cluster5	2.9495	2.72205	0.759414	0.737335	4.22333	4.58445	3.72612	4.33609	3.9875	4.34999	5.61679	6.04941	4.16058	0.338728	0.339383	1.50622	1.34035	6.26781	6.4339	1.91363	6.26911	9.79033	9.63702	12.0503	12.1607	4.16445	2.75321	2.84653	4.61911	6.81206	6.55718	28.2573	0.675801	-0.328262	2.20757	1.76647
cluster5	2.77691	2.61704	0.713453	0.682567	4.04835	4.25761	3.67711	4.30487	3.65997	4.0646	4.98181	5.39128	4.17409	0.317689	0.334333	1.39084	1.24547	6.25998	5.90021	1.57798	5.68396	8.80855	8.77334	9.7831	9.72195	3.36407	2.63083	2.87003	5.27329	6.41972	6.23164	27.0145	0.635726	-0.242355	3.19645	2.43637
cluster3	3.25135	2.94409	0.839624	0.805094	4.79631	4.83821	4.1183	4.32755	3.77398	4.28026	6.71496	7.08328	5.10319	0.344431	0.33715	1.6506	1.66996	7.37738	7.20075	1.82153	5.74575	11.1951	11.0847	13.0537	13.4193	3.71253	2.93698	3.21774	4.76659	8.1196	7.70098	29.2573	0.675801	-0.328262	1.81074	2.86256
cluster5	2.97916	2.75756	0.719196	0.694787	3.93325	4.08621	3.93473	4.3107	3.58919	3.98126	5.19867	5.40002	4.00618	0.301131	0.2879	1.39407	1.36878	6.15374	5.95318	1.63696	5.08281	9.11776	9.11513	10.9394	11.349	3.54609	2.58846	3.04346	4.41865	6.80912	6.71408	29.0002	0.633368	-0.237302	2.48384	2.47033
cluster4	2.55208	2.39298	0.668235	0.650251	3.84952	4.35852	3.92788	4.24718	3.49806	3.91455	4.97453	5.36422	3.93504	0.290841	0.296213	1.34805	1.35162	6.54069	6.34465	1.50579	5.61143	10	10.2486	12.1152	11.7524	3.32077	2.59964	2.93488	4.22478	7.01294	6.79545	29.043	0.640441	-0.252462	2.53304	2.2587
cluster2	2.45121	2.22057	0.50636	0.486241	3.08012	3.65224	3.41357	3.47232	3.30922	3.62653	3.77575	4.04855	3.67216	0.262825	0.26487	1.05712	1.00167	5.74194	5.61471	1.27303	4.38085	8.24802	8.30511	10.0347	9.35517	3.06597	2.38821	2.75461	3.75398	6.37529	6.05851	19.8288	0.60508	-0.176662	3.36111	3.32665
cluster3	3.21678	3.01114	0.758578	0.758164	4.6058	4.49108	4.11766	4.41071	3.94136	4.31373	5.97751	6.29032	4.5571	0.36984	0.380211	1.51279	1.50265	6.93843	6.79294	1.90555	6.40138	10.8429	10.8436	13.4245	12.9768	4.09772	2.83999	3.18034	4.96125	7.51764	7.63998	27.243	0.673444	-0.323209	2.4267	2.66839
cluster3	3.16105	3.04229	0.779241	0.779182	4.6072	4.6536	3.83448	4.14292	4.17643	4.60059	6.81498	6.97222	4.64924	0.381171	0.383273	1.56188	1.53722	7.27747	6.86086	2.05779	5.44712	10.3736	10.2493	12.5257	13.3525	3.84693	2.74741	3.12961	4.74753	7.10053	7.06341	28.2716	0.678158	-0.333315	1.89113	2.23929
cluster3	3.09118	2.95622	0.705278	0.729058	4.20805	4.48467	3.92206	4.34456	3.91425	4.40838	6.40924	6.68934	4.7098	0.336796	0.350521	1.42493	1.40107	7.09945	6.65085	1.88415	5.53925	10.9181	9.82647	12.4686	11.5622	3.90711	2.76026	3.13208	4.56346	6.53515	6.28413	27.1859	0.664014	-0.302995	2.14369	1.77254
cluster4	2.72528	2.52523	0.646843	0.649097	3.85603	4.13218	3.43392	3.85087	3.68673	4.21794	4.80025	4.9203	4.0583	0.3159	0.319548	1.32224	1.25892	6.18329	5.63418	1.49325	4.99769	9.56067	9.09932	11.7977	11.7367	3.14976	2.62623	2.89761	4.09853	6.15291	6.63566	26.9002	0.616867	-0.201928	2.81166	2.11875
cluster3	3.62077	3.31031	0.979707	0.958498	4.68389	4.95868	4.229	4.91159	4.36043	4.97728	6.77558	7.12419	4.50011	0.454675	0.449969	1.84137	1.8057	7.69476	7.30446	2.34514	6.43502	12.1862	11.2812	14.231	14.0998	4.21004	3.1684	3.52914	5.25682	8.80572	7.97955	28.2573	0.675801	-0.328262	1.74248	1.89755
cluster3	3.11376	3.11134	0.819864	0.831312	3.94827	4.32016	3.88612	4.15527	3.53032	4.01023	5.84333	6.08803	4.38224	0.351929	0.33952	1.5726	1.54991	7.09672	6.60628	1.74429	5.81552	11.2237	11.4286	13.3496	13.5453	3.77272	2.7006	3.16377	4.52542	7.38902	7.74486	29.2859	0.680516	-0.338369	2.21248	2.00108
cluster3	3.26125	3.0369	0.817801	0.796223	5.15586	5.42304	4.39969	4.8691	4.04802	4.32701	6.14379	6.29613	4.29547	0.363646	0.367745	1.62984	1.53069	6.61065	6.54267	1.95277	5.5885	10.1585	10.5566	13.0677	13.1961	3.95563	2.74109	3.04143	5.35752	7.6825	7.77999	29.2573	0.675801	-0.328262	1.99213	2.00757
cluster5	3.03001	2.79517	0.720582	0.706787	4.71746	4.46034	4.22039	4.47408	3.85156	4.09001	6.23912	6.57525	4.13499	0.348147	0.333371	1.39018	1.37043	6.19917	6.33558	1.77786	6.24491	9.4644	9.70789	12.5699	12.8922	3.90277	2.6055	3.02835	4.67018	6.88565	6.89031	29.1859	0.664014	-0.302995	1.69614	1.47298
cluster5	2.71454	2.57666	0.661204	0.675914	3.86654	3.67129	3.59759	3.58858	3.77796	4.18325	5.30618	5.78134	4.49369	0.311333	0.305918	1.21761	1.28295	6.03461	5.9524	1.28524	4.999	9.23708	9.71829	10.6822	11.2139	3.35081	2.50563	2.88908	4.35224	6.46871	6.39586	26.0573	0.642798	-0.257515	3.54046	2.55365
cluster2	2.36144	2.21375	0.598637	0.520933	3.38433	3.89125	3.53488	3.80628	3.49219	3.93603	3.93575	4.21146	3.58334	0.270244	0.27116	1.22393	1.05028	5.53793	5.25438	1.44409	5.46653	8.74278	7.94325	9.79581	9.69926	3.81282	2.41487	2.56774	3.84885	5.70189	5.22048	28.9716	0.628654	-0.227195	3.30047	2.28336
cluster3	3.37438	3.10132	0.834041	0.817828	4.34639	4.57738	4.12101	4.49571	3.8548	4.42337	5.88568	6.04293	4.22354	0.356248	0.357254	1.66748	1.59737	7.15605	7.29744	1.90111	6.26383	11.5532	11.0168	13.9535	13.4748	4.11468	2.94904	3.22938	4.84267	7.58733	7.6331	27.143	0.656942	-0.287835	2.54192	2.27214
cluster3	3.05574	3.01862	0.771434	0.586123	4.25613	4.31123	3.88157	4.03916	4.26939	4.39524	6.30424	6.62382	4.38687	0.332892	0.352536	1.58408	1.42157	6.56548	6.39158	1.91288	5.57351	9.93505	10.1178	12.9887	12.4366	3.69106	2.65541	2.97236	4.90028	7.66736	7.44878	29.2859	0.680516	-0.338369	1.73657	2.13978
cluster5	2.83985	2.65824	0.697115	0.674564	4.15419	4.15586	3.61173	4.06322	3.81513	4.33514	5.14282	5.33696	3.91532	0.360406	0.349637	1.35238	1.24923	6.97772	6.67109	2.03591	5.7581	10.9517	10.3852	13.5629	14.0446	4.0657	2.56722	2.80379	4.45722	6.80648	7.07267	29.1859	0.664014	-0.302995	2.06293	1.74023
cluster5	2.76531	2.70617	0.690646	0.734335	4.13843	4.13401	3.42098	3.5489	3.77485	4.04223	5.12237	5.13709	4.06766	0.324477	0.301073	1.32796	1.42018	6.91764	6.88458	1.74131	5.90774	9.87631	10.1823	11.7182	11.3508	4.08947	2.64706	3.27354	4.18537	6.57237	6.92892	28.9716	0.628654	-0.227195	2.34981	2.09357
cluster3	2.90456	2.82231	0.796735	0.791093	4.4077	4.45077	4.37439	4.57064	3.571	4.04103	5.70796	5.74035	3.87633	0.337624	0.344502	1.48015	1.3982	6.68632	6.40082	1.77074	5.4357	10.4253	10.3606	13.1278	13.5826	4.11649	2.60084	3.03685	5.16288	6.84265	7.35716	29.1716	0.661657	-0.297942	1.75765	2.25284
cluster5	2.87201	2.81348	0.661743	0.705352	3.86417	4.4221	4.05159	4.51789	3.73411	4.38185	5.22178	5.59189	4.18171	0.298774	0.287361	1.17173	1.2866	5.4309	4.98122	1.73191	5.104	8.53202	8.23093	11.3936	10.9822	3.46733	2.61129	3.15519	4.78867	6.05513	6.87971	28.9002	0.616867	-0.201928	2.77686	1.75087
cluster5	2.86619	2.67807	0.678488	0.68985	4.27042	4.48216	3.8712	4.04482	3.90429	4.39963	5.68713	5.96048	4.14836	0.337409	0.32159	1.27813	1.31709	6.59454	6.73936	1.73585	5.06091	9.19905	9.17262	11.2924	10.2764	3.31857	2.842	3.31247	4.71019	6.61858	6.45167	28.9573	0.626296	-0.222142	2.59023	2.22266
cluster3	3.12908	2.9385	0.768736	0.783864	4.15169	4.51123	3.92917	4.1049	3.72692	4.04432	5.96045	6.27033	4.69845	0.318706	0.340701	1.49116	1.49583	6.41536	6.1566	1.68948	5.49041	9.91864	9.67132	11.5949	11.2956	3.48324	2.79372	3.16904	4.33002	7.19233	6.87886	28.9716	0.628654	-0.227195	2.33738	1.99678
cluster5	2.9749	2.72315	0.812376	0.776431	4.92205	5.00606	4.13534	4.32355	4.20026	4.71951	6.23134	6.31563	4.40521	0.358974	0.360302	1.51993	1.37801	6.72889	6.73897	2.03398	7.02161	10.6969	10.5377	13.8224	13.4101	4.27233	2.82277	2.99974	5.2638	7.02748	6.81909	29.1716	0.661657	-0.297942	2.13762	1.59763
cluster2	2.44818	2.29981	0.60732	0.617242	3.61658	3.87223	3.642	4.31485	3.38876	3.68854	3.73987	3.77107	3.33762	0.271907	0.268714	1.14317	1.16831	4.92403	4.8026	1.44085	4.67959	7.81687	8.07518	9.92599	9.94434	2.72429	2.42638	2.80702	4.05991	5.88206	6.23999	26.9431	0.623939	-0.217088	3.38524	2.29856
cluster3	2.78262	2.95068	0.689902	0.766912	4.98789	4.7121	4.84333	4.92578	3.99842	4.16567	5.10944	5.17651	3.62459	0.382416	0.366756	1.36547	1.50195	6.37961	6.70587	2.03291	5.59697	9.82128	9.75812	12.2675	11.7892	3.94115	2.73741	3.41945	5.35232	6.93335	7.11938	27.9002	0.616867	-0.201928	2.72327	2.272
cluster5	2.83888	2.6847	0.717568	0.709795	4.23359	4.1577	3.83819	3.8093	3.48169	3.96823	4.55862	4.58564	3.67393	0.337204	0.324379	1.36588	1.27018	6.16484	6.18894	1.5961	5.73821	9.76913	9.71815	11.796	10.8757	3.83145	2.68422	3.06981	4.5691	6.44922	6.46591	28.8574	0.609795	-0.186768	2.88423	1.99228
cluster3	3.2213	3.20985	0.816482	0.86426	4.21608	4.62383	3.64543	4.00384	3.95684	4.42834	6.17425	6.44838	4.32911	0.358533	0.343936	1.56816	1.59754	6.81187	6.96748	1.8756	6.17534	10.3212	9.96235	12.3013	12.5913	4.31508	2.92785	3.30994	4.39469	6.67311	6.78786	29.1287	0.654585	-0.282782	2.0233	2.05329
cluster3	3.34193	3.03389	0.789248	0.799393	4.5238	4.72579	3.69237	4.38135	4.08574	4.52881	6.16448	6.34825	4.23595	0.361671	0.358206	1.45931	1.41648	6.56987	6.37476	1.94956	6.45707	9.44265	9.86699	11.9056	12.3729	3.87191	3.0642	3.27792	4.95436	6.27598	6.49901	29.0002	0.633368	-0.237302	2.33424	2.35387
cluster5	2.65508	2.73173	0.525656	0.626382	3.82664	4.02555	4.09441	4.25144	3.99683	4.51499	5.19286	5.38207	4.15498	0.316219	0.29635	1.05274	1.21254	6.36627	6.40126	1.8353	5.69574	9.54294	9.73473	11.5626	12.4489	3.7819	2.61608	3.18754	4.4387	5.80722	7.14306	28.9145	0.619224	-0.206982	2.89212	2.29655
cluster3	3.17115	2.90958	0.788472	0.764581	3.85542	3.83702	4.00042	4.12656	3.74227	4.0219	6.10706	6.31474	4.35515	0.301566	0.308472	1.47176	1.45244	6.26839	6.10635	1.77203	5.55901	8.61623	8.79785	10.8845	10.5666	3.85354	2.85349	3.17795	4.56401	6.82416	7.01302	29.0859	0.647513	-0.267622	1.90771	2.3104
cluster5	2.99986	2.78771	0.766995	0.747032	4.02895	4.44787	3.90707	4.04915	3.80551	4.0934	6.1448	6.30115	4.60029	0.344996	0.33531	1.34337	1.4161	5.88779	5.86785	1.49935	5.05783	8.78915	8.96028	11.3656	10.7318	3.44449	2.75211	3.20845	4.70536	6.47076	6.61341	28.9859	0.631011	-0.232248	2.30909	2.00412
cluster3	3.36196	3.13545	0.878386	0.900563	4.58854	4.72325	4.23099	4.6981	3.97123	4.55176	6.68811	6.92824	4.52251	0.371751	0.358622	1.52889	1.65842	6.84131	6.34686	2.00888	6.69546	10.4081	9.73792	13.4565	12.3666	4.31824	2.87036	3.23716	5.71571	7.25267	7.58836	28.1002	0.64987	-0.272675	1.9051	1.46947
cluster4	2.70685	2.48191	0.686474	0.666328	4.16111	4.42751	3.89408	4.10149	3.71183	4.1057	4.73921	4.69703	4.06421	0.330081	0.318503	1.18733	1.21579	6.19867	5.93269	1.87073	5.27162	8.81329	9.23802	11.1886	10.9811	3.67635	2.55933	2.85362	4.93477	6.85731	6.94331	28.9145	0.619224	-0.206982	3.03006	2.06268
cluster5	2.9895	2.80696	0.736978	0.698473	3.90567	4.32992	3.92561	4.38114	3.91632	4.09386	5.54528	5.6245	4.17802	0.348193	0.345723	1.37652	1.29052	6.64281	6.48236	1.73833	5.71043	9.29451	9.13378	11.0112	10.6666	3.76754	2.67311	3.01366	4.84041	6.54939	6.31708	28.9573	0.626296	-0.222142	2.35055	1.82927
cluster3	2.92545	2.84627	0.7332	0.718473	4.4934	4.28486	4.26115	4.07875	3.69987	4.14811	5.00096	5.20865	3.87533	0.364251	0.35127	1.26235	1.29633	5.8429	5.84747	1.72247	5.16799	8.92859	8.67343	11.4454	10.7777	3.42548	2.74463	3.07235	4.60967	6.35253	6.4318	28.9431	0.623939	-0.217088	2.71726	1.9874
cluster3	3.14807	2.90944	0.791641	0.800959	4.53279	4.40849	3.80413	4.09527	3.81973	4.23695	6.34035	6.54122	4.81182	0.339279	0.329257	1.47939	1.46662	6.23913	5.96499	1.57984	5.15397	9.21116	9.37627	12.1913	11.9982	3.52322	2.73752	3.09816	4.62458	6.67673	6.92713	29.1287	0.654585	-0.282782	2.25125	1.89081
cluster5	2.93021	2.75378	0.816083	0.819368	3.70941	4.06298	3.91052	4.53957	3.51416	3.89826	5.36888	5.71866	4.19806	0.311591	0.309907	1.41318	1.36869	5.88855	5.89313	1.75017	6.51424	9.46957	9.27916	12.1032	11.8679	4.20244	2.45397	2.86114	4.27794	6.77066	7.26148	29.0859	1.86157	-0.356539	2.18431	2.10428
cluster3	3.32157	2.99923	0.892861	0.894854	4.93072	5.12496	4.17343	4.35469	3.86285	4.32326	7.1369	7.03763	4.49954	0.395113	0.382272	1.69258	1.7317	6.92386	6.80531	1.88391	6.47365	10.5006	10.3593	12.7371	12.7577	4.09541	3.04014	3.36329	4.91881	7.85577	8.21519	28.2287	0.671086	-0.318155	2.18614	1.4943
cluster4	2.72024	2.5483	0.701675	0.675615	3.74125	3.91053	3.65418	4.21212	3.62625	4.13941	4.58786	4.72849	3.59316	0.311434	0.310958	1.29027	1.26623	5.8898	5.77342	1.53845	6.06693	9.11595	8.64601	12.2439	11.4435	3.8202	2.70633	3.07413	4.46376	6.39184	6.31486	27.8716	0.612152	-0.191822	2.59792	1.61962
cluster3	3.2411	3.18102	0.808841	0.827469	4.22064	4.7292	3.82588	4.65643	3.82423	4.22289	5.64072	5.61695	3.94957	0.346193	0.349456	1.53588	1.63949	6.80669	6.70565	1.90741	5.69575	10.5195	10.0791	13.1266	12.3746	3.87745	2.9679	3.47473	4.5016	7.50557	7.83215	28.9859	0.631011	-0.232248	2.52513	2.22246
cluster3	3.34419	3.06966	0.729928	0.736205	4.31313	4.19989	3.92614	3.94909	4.06455	4.32535	5.67509	5.71526	4.17172	0.347078	0.3315	1.32168	1.32411	6.23965	6.215	1.63121	6.34478	9.62281	9.52246	11.6256	10.4735	4.04569	2.72957	3.12039	4.30026	6.65735	6.56706	28.9716	0.628654	-0.227195	2.83945	1.85327
cluster5	3.05766	2.79208	0.775653	0.734905	4.44036	4.83854	4.40326	4.50719	3.64659	3.91529	5.44661	5.64655	3.91781	0.346613	0.348582	1.51312	1.45565	7.10378	6.65881	1.76317	6.3239	10.004	9.21637	11.9487	10.9698	4.07992	2.93235	3.12943	5.06364	7.37809	6.9942	28.9145	0.619224	-0.206982	2.36144	1.94235
cluster3	3.22833	3.09155	0.826529	0.844272	5.06912	4.91877	4.53108	5.12344	4.04364	4.63941	6.29818	6.38246	4.67757	0.414734	0.380915	1.59839	1.5415	7.08837	7.07532	2.16135	6.32417	10.2189	10.4437	13.3628	12.7309	4.45967	2.97912	3.41943	5.23648	7.68881	7.92279	29.1002	0.64987	-0.272675	2.46452	2.11623
cluster3	3.33699	3.20739	0.855138	0.858456	4.80265	4.603	4.12053	4.71228	4.21893	4.46536	6.34728	6.55219	4.78476	0.378738	0.370453	1.57675	1.60855	6.97597	6.98987	1.77298	6.62169	10.2162	10.6917	12.8471	13.0519	3.8887	2.89507	3.38862	5.06311	7.25567	7.72874	29.1716	0.661657	-0.297942	2.23474	2.35088
cluster3	3.04184	2.94205	0.807974	0.773354	3.64714	3.90949	3.48284	4.16399	3.55101	4.22823	5.66204	5.90856	4.38191	0.35385	0.358607	1.53505	1.49205	6.19043	6.06583	1.93275	6.13449	8.99329	9.03467	11.2238	11.3319	3.64837	2.87561	3.15182	4.55056	6.85197	7.06183	29.0573	0.642798	-0.257515	2.28701	1.88366
cluster5	2.91721	2.76151	0.741237	0.735916	4.01522	4.20462	3.90734	4.33036	3.62255	3.79671	4.92007	5.12759	4.1807	0.335498	0.322461	1.47178	1.40643	6.44481	6.59329	1.69283	5.1168	9.92241	9.787	11.7456	11.4703	3.74269	2.66502	3.02033	3.95527	6.8285	6.48492	27.1859	0.664014	-0.302995	2.03013	1.92238
cluster5	2.9238	2.69294	0.708699	0.693436	3.90629	4.10602	3.93136	3.99397	3.45362	3.71478	4.49072	4.62178	3.98736	0.29147	0.284769	1.42529	1.3669	6.54495	6.19295	1.51813	4.95164	9.53408	9.19936	10.9086	10.4676	3.6125	2.79593	3.09359	3.87249	6.40352	6.50134	27.0002	0.633368	-0.237302	2.38193	2.66422
cluster5	3.00968	2.81484	0.70057	0.685178	4.06571	4.23625	3.96278	3.93172	3.43181	3.69387	4.2651	4.34689	3.86898	0.25584	0.25543	1.41474	1.36128	6.76704	5.92581	1.38572	4.89799	9.36489	8.82242	10.38	9.76411	3.55951	2.95052	3.17603	3.90665	6.09274	6.60188	23.9431	0.623939	-0.217088	2.44696	2.68234
cluster4	2.55993	2.48683	0.584849	0.617608	3.97528	4.50581	4.16423	4.2256	3.89529	4.0743	4.55248	4.73876	3.69558	0.279201	0.291079	1.13428	1.25583	5.87152	6.09423	1.6986	5.32931	8.73725	8.87982	9.83938	9.51237	3.59286	2.49589	2.95934	3.99282	5.94391	6.39485	28.8288	0.60508	-0.176662	2.78696	2.17628
cluster5	3.03518	2.78773	0.767012	0.73528	3.8093	3.78446	3.92004	4.0212	3.71636	4.01332	5.35345	5.39879	4.11483	0.301753	0.310929	1.53431	1.43678	7.00517	6.454	1.63745	5.90874	9.81357	9.41259	11.7155	11.6261	4.3795	2.90026	3.18554	4.05738	6.65066	6.59357	29.0002	0.633368	-0.237302	2.33869	2.07187
cluster5	2.99179	2.72214	0.666064	0.654513	3.6532	3.8949	3.61073	3.85172	3.3399	3.66356	5.01013	5.05984	4.33852	0.268171	0.298767	1.32446	1.28626	5.7499	5.78758	1.60062	5.56124	8.88708	9.01238	10.6008	11.0902	3.5302	2.75808	3.12833	3.75718	5.93765	6.41176	28.9145	-1.11146	0.86888	2.66919	1.87565
cluster3	3.1763	3.01693	0.74519	0.751399	4.05128	4.63347	3.3438	4.15604	3.85273	4.13679	5.48563	5.44529	4.05986	0.33558	0.315558	1.45453	1.37583	6.59302	6.54306	1.66074	6.12448	9.61148	10.2491	11.9726	11.8734	3.97456	2.94459	3.24566	4.28107	6.83516	6.88843	28.0716	-0.37068	0.0198901	2.70689	2.26622
cluster3	3.11978	2.86343	0.84911	0.832997	3.77743	4.17172	4.05854	4.49972	3.64637	3.9224	6.0571	6.03947	4.4484	0.340757	0.360933	1.6315	1.43868	6.86716	6.38762	1.64345	6.13779	10.12	9.76879	10.9748	11.5056	4.03418	2.83736	3.23041	4.47156	6.9189	7.72219	29.0288	1.50342	0.450642	1.94552	1.66831
cluster5	2.96823	2.70483	0.730672	0.696078	3.82144	3.74902	3.88415	3.9512	4.17611	4.59547	4.92843	4.77087	3.95565	0.312979	0.321031	1.37476	1.27719	6.88331	6.29443	1.72431	5.73747	10.504	9.76086	12.4396	11.299	4.00598	2.90294	3.19032	4.24252	7.2085	6.67892	26.9002	-0.62471	2.63705	2.70115	1.7453
cluster5	3.34071	2.69976	0.790751	0.632815	4.14544	4.46365	4.20786	4.40112	3.79224	4.16294	5.51465	5.32661	4.18657	0.339854	0.320487	1.51104	1.23493	6.64705	6.08636	1.78334	5.84949	9.78136	10.5575	11.8403	12.45	3.35047	2.94388	3.09457	4.20655	7.42507	6.86937	28.9002	-0.869263	0.927906	2.84433	2.3438
cluster5	2.85251	2.69805	0.691826	0.694343	3.80078	3.84954	3.81377	4.39807	3.52001	4.08707	5.06926	5.38795	4.11098	0.323724	0.31283	1.30591	1.34445	5.32635	5.40521	1.68752	6.1886	8.89831	9.1806	10.3013	11.3403	3.65917	2.55045	3.07903	4.66473	6.54257	6.92439	28.9716	1.77617	0.452864	2.6073	1.86792
cluster5	2.85242	2.7103	0.71448	0.69269	3.96789	4.30947	3.94715	3.92919	3.54406	4.04643	5.75166	5.84113	4.22504	0.308017	0.289232	1.29613	1.26918	5.77857	5.69328	1.77245	5.19231	8.91851	8.3654	12.144	11.3024	3.28499	2.48871	2.92058	4.46732	6.63448	6.81881	26.9573	0.626296	-0.222142	2.40694	2.4092
cluster5	3.0915	2.76537	0.80366	0.790476	4.5356	4.76509	3.85561	4.38607	4.30572	4.60419	5.85014	5.82172	4.04951	0.347474	0.348195	1.60276	1.56771	7.39603	6.8878	1.66498	5.70694	10.8898	10.7393	11.8924	12.0837	4.00144	3.08614	3.26106	4.73698	8.20389	7.62917	29.0288	0.638083	-0.247408	1.88292	2.13658
cluster3	2.99894	2.91377	0.744796	0.750617	4.20587	4.59769	3.68854	3.9975	3.49935	3.73263	5.52489	5.61426	4.43895	0.354831	0.343247	1.45946	1.49417	6.35302	6.55254	1.73178	5.29529	10.4598	9.60176	12.2277	11.0451	3.50482	2.72	3.07944	4.349	7.36587	7.23984	29.0002	-0.438903	-0.525158	2.9951	2.16455
cluster3	3.11524	2.93183	0.723504	0.755581	4.49084	4.27854	4.42438	4.41745	3.47843	4.04367	5.68163	5.75779	4.64177	0.320038	0.30481	1.31625	1.40408	6.16894	5.96802	1.77362	5.02571	9.1629	10.0367	10.9433	11.8244	3.11671	2.67709	3.07076	3.90272	6.62376	6.87192	29.0002	0.689804	-0.330855	2.5365	2.09396
cluster5	2.75513	2.70243	0.646526	0.678495	4.42745	4.52601	3.8828	4.29993	3.59792	4.12818	4.5761	4.9778	3.92102	0.317605	0.310483	1.29463	1.31601	6.62781	6.44641	1.63721	5.39896	10.1444	10.3244	11.6366	11.3888	3.62957	2.51745	3.041	4.59581	6.78735	7.07815	27.9716	1.21182	-0.0310932	2.99643	2.27628
cluster3	3.11114	2.88163	0.750869	0.74442	4.13806	4.59721	4.01261	4.38851	3.71995	4.10112	5.52058	5.64013	4.5732	0.323497	0.310483	1.47582	1.58612	6.45218	6.42873	1.85031	4.86567	9.83157	9.65045	11.9722	11.7308	3.46676	2.86325	3.22921	4.7147	7.46333	7.43286	29.0002	1.49871	-0.429805	2.04145	1.8089
cluster2	2.41313	2.38428	0.432389	0.44203	3.90756	4.04017	3.17981	3.6604	3.58092	4.09842	4.35308	4.45654	3.67538	0.251056	0.235298	0.796707	0.883165	5.32093	5.54833	1.47091	5.13703	7.64242	8.08193	9.28815	9.82047	3.51967	2.25019	2.90483	3.85756	5.17553	5.64867	28.9573	0.438179	0.439927	3.18036	2.57784
cluster5	3.05405	2.81009	0.777343	0.768725	3.75268	4.02541	3.93265	4.00698	3.50892	4.0484	5.34931	5.49362	4.24247	0.331071	0.32721	1.52224	1.51458	6.35394	6.43322	1.68687	5.80989	8.8945	9.23448	10.9725	10.8472	3.8833	2.94907	3.41629	4.24548	6.899	7.10588	28.8716	-0.873978	1.65765	2.44071	1.88791
cluster3	3.06978	2.87062	0.776642	0.733558	4.69781	4.76084	4.25495	4.45997	3.94735	4.36181	5.88218	6.00932	4.19331	0.358458	0.354012	1.52992	1.35121	6.88826	6.24214	2.13458	6.0244	10.2683	9.33679	12.4144	11.7152	3.72545	2.86917	2.98748	4.57609	6.42963	6.73594	28.2002	1.60696	-0.68586	1.96549	2.35795
cluster5	2.78432	2.75813	0.724448	0.77972	4.17974	4.54068	4.53711	4.81419	3.87787	4.35976	5.21078	5.40248	4.00064	0.358532	0.345656	1.35426	1.47805	6.87915	6.39349	1.83867	5.51966	10.2269	9.98553	11.0601	10.9226	3.70078	2.71035	3.22364	4.37222	7.10662	7.62853	27.9859	-0.535319	1.23941	2.14895	2.22783
cluster3	3.36894	3.12515	0.798284	0.806123	4.78658	4.69272	4.59545	4.70881	3.87712	4.26182	5.19564	5.22026	4.17548	0.323346	0.319587	1.51549	1.52915	6.45254	6.22805	1.85484	5.60096	9.24059	9.28473	12.2848	11.4111	3.86357	2.84792	3.31279	4.85703	7.61711	7.53551	25.9573	0.626296	-0.222142	3.30282	2.15302
cluster5	2.7886	2.71925	0.680888	0.695529	3.92868	4.05676	3.86582	4.09089	3.60649	4.17365	4.95261	4.93914	3.76828	0.290223	0.293415	1.27704	1.35374	5.86061	5.76932	1.62589	4.88687	8.57586	9.02871	10.3436	10.1609	3.17563	2.5343	2.98231	3.99559	6.56426	6.7819	28.9431	0.623939	-0.217088	2.00424	2.07453
cluster5	2.92961	2.72943	0.778517	0.772271	4.21641	4.15028	4.38575	4.39215	3.4402	4.05134	4.70944	4.7678	3.97221	0.342139	0.344479	1.45895	1.45337	6.49752	5.94385	2.01088	5.34499	9.94234	9.59318	12.0591	12.3954	3.77501	2.74733	3.05114	4.30351	6.85312	7.53829	28.9288	0.245346	0.25753	2.76508	1.96383
cluster5	2.8933	2.79872	0.721832	0.737154	3.81066	3.77968	3.78785	3.839	3.29685	3.79978	5.51101	5.53847	4.29091	0.338483	0.35039	1.43025	1.4503	6.30556	6.4273	1.71939	5.10617	9.3398	9.69225	11.1523	10.7633	3.53635	2.53163	3.08377	4.07838	7.23367	7.54313	29.0145	0.635726	-0.242355	2.13129	2.24162
cluster5	2.8855	2.70459	0.729661	0.742043	4.73157	4.68742	4.84015	4.36623	3.68294	4.00719	5.33091	5.29974	4.16267	0.301988	0.305618	1.49067	1.4384	6.75937	6.36868	1.5716	5.43596	10.1094	9.77744	11.2667	10.717	3.56841	2.82206	3.25032	4.44179	6.77725	6.94622	27.8288	1.79022	0.0356322	2.81208	2.36336
cluster5	2.94335	2.69381	0.702238	0.663026	4.35634	4.47342	3.43251	3.74033	4.39339	4.76189	5.32388	5.35733	4.12635	0.337898	0.354437	1.42339	1.35293	6.82018	6.42358	1.6734	6.36295	10.0921	9.72757	12.1953	11.8214	4.18497	2.97674	3.21661	4.76588	6.30017	6.18223	28.0002	-0.702267	-0.584528	2.46781	1.89428
cluster3	3.14423	3.00506	0.794352	0.796722	4.73154	4.6819	4.38055	4.51956	3.98405	4.34711	6.21522	6.39321	4.62481	0.366428	0.363181	1.41198	1.41604	6.69195	6.46884	1.96496	6.04497	9.26867	9.37211	11.5224	11.5091	3.79769	2.8348	3.25593	5.18688	7.13748	6.888	29.0002	0.633368	-0.237302	2.37503	2.34406
cluster5	2.91049	2.71606	0.688167	0.696871	3.77321	4.51169	3.48218	3.88198	3.30345	3.88313	5.10331	5.1743	4.255	0.319217	0.30873	1.32913	1.36852	6.20575	5.63423	1.6863	5.15795	10.1534	9.03611	12.5296	11.2178	3.27798	2.58676	2.92357	4.07499	6.84366	6.89929	26.9716	0.628654	-0.227195	2.10464	1.95941
cluster5	2.83808	2.73126	0.670679	0.688717	3.56498	4.10608	3.5146	4.38724	3.82979	4.21731	5.40819	5.69432	4.32797	0.33989	0.327047	1.18452	1.26378	5.57479	5.4043	1.80999	4.94842	7.98391	8.52192	10.691	11.5777	3.17097	2.47615	2.87821	4.11319	5.31749	5.80993	28.9859	1.12012	-0.135097	2.10543	1.81958
cluster3	3.09343	2.92054	0.763291	0.768927	4.30316	4.65708	3.87999	4.0925	4.23968	4.44528	4.91789	5.03735	3.93017	0.323445	0.309288	1.37748	1.3431	6.35958	6.29114	1.8346	5.21767	9.68393	9.63308	12.7786	11.768	3.75723	2.81338	3.22704	4.63825	6.98999	7.04819	27.9288	0.621582	-0.212035	2.88344	2.1221
cluster3	2.88379	2.86785	0.72117	0.728594	3.4377	3.91141	3.39476	3.94726	3.52341	3.85556	5.33336	5.47442	4.31953	0.292332	0.308637	1.33811	1.45486	5.37826	5.19187	1.68385	6.16296	8.28793	8.75364	10.8581	11.2559	3.79723	2.464	2.9555	4.21025	6.82897	7.06084	27.9573	0.626296	-0.222142	2.34527	2.23244
cluster5	2.69622	2.5986	0.692447	0.712016	4.04208	4.04239	4.25488	4.42595	3.56419	4.0919	4.47943	4.58198	3.72593	0.280051	0.275958	1.29904	1.30436	5.8457	5.77954	1.74196	6.13472	9.13734	8.72691	11.2182	10.8521	3.96294	2.55264	2.90327	4.2975	6.42359	6.76698	28.9573	0.626296	-0.222142	2.37664	2.05497
cluster3	3.12986	2.90001	0.715419	0.70976	4.01835	4.21167	3.60067	4.17698	3.66148	3.98952	5.12103	5.35151	4.39146	0.316965	0.310518	1.35376	1.34847	6.39103	5.94484	1.88624	5.62602	9.65187	8.95322	11.6165	11.5012	3.5863	2.6963	3.09134	4.66326	6.83785	7.30943	27.9573	0.626296	-0.222142	2.46799	2.8052
cluster3	2.93811	2.83203	0.72899	0.755606	3.86579	3.98075	3.89333	4.52863	3.39756	4.08006	5.25073	5.37132	4.22242	0.324359	0.324863	1.3726	1.42051	6.2275	5.78371	1.7355	5.56603	9.903	9.8101	11.164	11.1565	3.88283	2.66105	3.03148	4.76518	6.99659	6.71366	28.9859	2.15476	-0.232248	2.38255	2.90161
cluster3	2.97958	2.81406	0.775408	0.778241	4.1932	4.52314	4.09576	4.36292	3.79587	4.24561	5.74551	5.90305	4.19558	0.353561	0.325366	1.52017	1.57243	6.67156	6.39215	1.84737	6.12301	10.1932	10.0053	12.187	12.5285	4.35126	2.85307	3.21807	4.25561	7.19642	7.03426	28.9859	0.631011	-0.232248	2.20958	2.42395
cluster3	3.01019	2.86366	0.797893	0.824705	4.19038	4.58814	3.78057	4.23024	3.38909	3.79975	6.03969	6.21753	4.82073	0.324837	0.319762	1.45137	1.47306	6.62727	6.35882	1.70327	5.98607	10.492	9.57187	12.209	10.9172	3.87823	2.56859	3.07038	4.59325	7.27101	6.92334	28.9573	0.626296	-0.222142	2.49065	1.99442
cluster5	3.01232	2.6848	0.757285	0.708848	4.11388	4.14436	3.74516	4.09997	3.44608	3.92925	5.26498	5.42237	4.20448	0.29944	0.323072	1.40756	1.32824	6.24944	6.18329	1.69287	5.28048	9.47346	8.88928	12.1	10.994	3.53028	2.79615	3.09446	4.20349	7.03853	6.87676	26.9288	1.50573	0.521997	2.73654	2.4215
cluster5	3.06959	2.67108	0.773546	0.74809	4.0568	4.16656	3.70588	3.88919	3.52288	3.83226	5.11266	4.96101	4.00886	0.300147	0.325402	1.53773	1.50648	6.51287	5.93394	1.70982	5.32113	10.0289	9.0305	11.888	11.6047	3.64971	2.90994	3.1723	4.03656	8.0432	7.78203	26.9002	0.616867	-0.201928	2.38994	2.1678
cluster3	3.05789	2.83624	0.723335	0.72313	3.86264	4.01274	4.05268	4.49879	3.68566	4.15313	6.08078	6.07409	4.44093	0.376077	0.378035	1.42612	1.37661	6.42581	5.98674	1.86259	5.49917	9.47987	8.66664	11.1194	11.09	3.39783	2.91667	3.16473	4.23335	6.85434	6.48963	29.0716	0.58872	-0.944427	3.16229	2.3999
cluster5	3.08456	2.76609	0.80717	0.809827	4.48296	4.46211	3.96059	4.39458	3.96258	4.12349	6.05202	6.07822	4.51663	0.351257	0.351521	1.62612	1.59299	6.90945	6.76004	1.94363	6.39174	10.6774	9.87004	12.826	11.9212	3.97223	3.00794	3.1833	4.85095	7.91723	7.28212	25.0573	-0.316602	-0.694696	1.86153	2.21561
cluster3	3.08105	2.92594	0.737263	0.749558	4.04628	4.5944	4.0291	4.74696	3.5426	3.89235	5.77327	5.73406	4.18184	0.370551	0.37904	1.47397	1.49071	7.44466	6.55884	1.93787	5.82839	9.62079	9.33821	11.3719	11.3259	4.1167	2.92053	3.15266	4.49357	6.98611	7.06172	28.0573	0.699233	-0.575956	1.87002	2.45547
cluster3	3.24473	2.8993	0.79964	0.819828	4.51828	4.39615	3.95561	4.37606	3.92325	4.4017	5.44745	5.49543	4.05319	0.349989	0.340894	1.57687	1.55	7.28422	6.92355	1.79406	7.11172	10.2863	10.307	12.3135	12.4294	4.64607	3.11615	3.31791	4.29142	8.00406	7.65078	27.9573	-0.991516	0.229432	2.293	2.35766
cluster5	2.86676	2.74834	0.742186	0.70753	4.00028	4.23513	4.00781	4.20227	3.6816	4.09003	5.41562	5.44355	3.87816	0.340597	0.32964	1.38495	1.35141	6.48431	5.83426	1.90091	5.99838	8.45875	9.01388	9.77186	10.9742	3.73279	2.74332	3.07214	4.35554	7.10608	7.02107	28.0002	1.53633	-0.564738	2.33928	2.71639
cluster5	2.96216	2.6912	0.751459	0.698797	4.3582	4.20903	3.88831	4.36231	3.79	4.13751	5.28113	5.19148	3.89209	0.31778	0.345139	1.46804	1.34458	6.56335	5.70097	1.80819	4.86933	9.01327	8.77229	9.97618	11.1001	3.44192	2.73426	2.96766	4.36278	7.02561	6.87171	27.8716	0.612152	-0.191822	2.85655	2.83758
cluster5	2.5865	2.59952	0.648636	0.667	4.15773	4.18677	3.88596	4.38532	3.37306	3.99565	4.77108	4.78317	3.83169	0.285355	0.280426	1.2052	1.26118	6.38751	5.89443	1.60494	5.1651	9.5844	8.96922	9.97592	9.44959	3.31045	2.48278	2.96607	3.92302	6.81516	6.98718	26.8716	-1.25021	-0.704565	3.02009	2.13194
cluster5	2.83108	2.71704	0.696637	0.69821	3.91536	4.06595	3.79969	4.20601	3.62529	4.03582	5.40449	5.47305	4.26035	0.338569	0.331182	1.33918	1.37404	6.50713	6.27347	1.90776	5.34477	9.62442	9.88901	11.5744	11.3049	3.88056	2.6668	3.11832	4.5049	7.10903	6.9958	27.9859	0.631011	-0.232248	2.01162	1.87668
cluster3	3.06186	2.92382	0.750749	0.751976	4.35279	4.09454	4.13372	4.19595	3.67392	4.00114	5.44541	5.7157	4.22694	0.328102	0.301242	1.34633	1.36836	5.57254	5.42747	1.655	5.84114	8.74951	8.10473	11.4602	10.9803	3.91244	2.64458	2.8926	4.53322	6.77539	6.4893	26.0145	1.57631	-0.762295	2.56824	1.65265
cluster5	2.99313	2.81063	0.737351	0.713022	3.88307	4.14207	4.10618	4.1505	3.54407	3.73794	5.71837	5.65697	4.47338	0.326056	0.323499	1.33909	1.27765	6.39893	6.00341	1.52763	5.22101	9.2965	9.16773	11.3125	11.6008	3.34502	2.76242	3.00843	4.69657	6.95864	6.98419	26.9431	0.623939	-0.217088	2.39224	2.13318
cluster5	2.73796	2.75267	0.635681	0.648734	3.6757	3.82798	3.77442	3.93891	3.24235	3.94305	4.01136	4.0459	3.72089	0.281163	0.264748	1.1883	1.24079	6.02381	5.57213	1.43582	4.80942	8.29823	7.90791	9.49439	8.94934	3.37937	2.53885	3.02437	3.96828	6.0018	6.33249	26.8002	0.600365	-0.166555	3.68535	3.43816
cluster5	2.96381	2.68869	0.747576	0.689779	4.08767	4.19498	3.72277	3.99724	3.71117	3.85504	5.86999	6.0056	4.56863	0.333406	0.33626	1.59581	1.43077	7.59263	7.25203	1.74703	5.69164	10.8954	10.9236	12.7031	12.6956	4.06816	3.05749	3.23768	4.52619	7.24797	7.58489	29.1002	0.631058	0.159109	1.80165	2.4286
cluster5	2.95196	2.58875	0.723984	0.680783	3.99766	4.08434	3.72452	4.0628	3.67286	4.22265	4.67152	4.47297	3.71733	0.316759	0.329828	1.38971	1.30091	6.49902	6.03702	1.81213	4.98064	9.85269	9.53674	11.0037	10.7075	3.51279	2.7858	3.19545	4.26806	6.41995	6.67611	28.8002	1.39046	-0.558758	3.40781	2.39687
cluster5	2.79611	2.62935	0.652699	0.642219	3.79671	4.09088	3.5591	3.81151	3.49427	3.88711	5.41723	5.35868	4.2792	0.324142	0.312738	1.35088	1.30648	6.22355	5.84613	1.63504	4.62839	8.96761	9.3391	10.7029	10.4916	2.99464	2.58537	3.01738	3.9889	6.79445	6.4165	25.9002	0.616867	-0.201928	2.79776	2.50401
cluster5	3.01532	2.74251	0.73554	0.740795	4.02416	3.83034	4.00293	4.15687	3.86089	4.28746	5.25181	5.15585	4.2264	0.298014	0.293439	1.4328	1.41108	6.33924	6.11156	1.56873	5.26317	9.57564	9.14139	12.1892	12.0823	3.50097	2.92424	3.1799	4.35829	6.88017	7.09754	27.9716	0.628654	-0.227195	2.19263	2.2323
cluster5	2.98476	2.79958	0.730272	0.744123	4.00355	4.18882	4.00281	4.10145	3.79394	4.21888	5.76822	6.00612	4.1615	0.339839	0.335651	1.47569	1.45308	6.54923	6.46996	1.94497	5.77256	10.0721	10.2467	11.7073	11.5434	3.78905	2.69545	3.05253	4.61506	7.45603	7.35472	29.1145	2.30766	-0.461237	1.8694	1.71908
cluster3	3.0792	2.88457	0.795265	0.874722	4.03503	4.1566	3.92503	4.45668	4.15057	4.31564	5.6115	5.39558	4.11363	0.340102	0.331594	1.57092	1.71768	6.53291	6.57537	1.82077	5.79528	9.84913	9.83853	12.0316	11.8485	3.83463	2.92247	3.39777	4.49392	7.3252	7.31457	29.0002	-0.213161	-0.465787	2.19951	2.94679
cluster5	2.71453	2.69802	0.583011	0.644534	3.75431	3.95727	3.59151	4.14617	3.25649	3.78702	4.4587	4.46474	3.85813	0.30532	0.283782	1.0516	1.26378	5.41419	5.30943	1.47052	5.43446	8.05804	8.1545	10.0284	9.75154	3.58799	2.48847	3.14267	3.57412	5.99826	6.13721	28.9431	0.623939	-0.217088	2.97327	2.26685
cluster5	3.06341	2.76597	0.772766	0.778409	3.79228	4.31696	3.75416	4.47872	3.63906	4.07926	5.64985	5.75998	4.60102	0.343091	0.329002	1.45536	1.5044	6.66374	6.30483	1.8196	5.66631	9.98853	10.2791	12.2837	11.5605	3.83693	2.91859	3.15605	4.39775	7.1294	7.38142	27.8859	0.840251	0.0514008	2.21424	2.02292
cluster3	2.93475	2.87243	0.733405	0.752024	3.39056	3.69178	3.58683	3.83276	3.72143	4.05184	4.66992	4.68317	4.10459	0.308937	0.306169	1.40876	1.44815	6.34118	6.22473	1.65368	4.27235	9.47137	9.16737	11.8939	11.325	3.21483	2.72034	3.12973	3.74559	7.10793	7.12984	28.8145	1.39282	-0.184202	3.2798	2.65588
cluster3	2.95449	2.83915	0.726883	0.709892	3.86076	4.17176	3.86197	3.89787	3.54504	3.94306	5.98538	6.24592	4.69858	0.308547	0.32573	1.38929	1.25266	5.98156	5.77948	1.62357	5.17129	8.72163	8.40022	11.0759	10.8608	3.70493	2.67969	2.97263	4.07266	7.33907	6.767	29.0573	-0.617591	-0.318685	2.24445	2.44386
cluster3	3.21228	3.00633	0.751757	0.760907	3.95284	4.08748	3.64295	3.95188	3.94547	4.41344	5.31672	5.509	4.24557	0.315032	0.321893	1.48052	1.46428	6.43238	6.10244	1.63513	6.06127	9.72054	10.2167	11.8053	11.7237	3.74698	2.79135	3.06389	4.56638	7.22164	6.99216	27.0002	1.61158	-0.582729	2.27916	2.31208
cluster3	3.02608	2.8638	0.807033	0.761336	4.30163	4.56081	3.54772	3.94583	3.71877	4.22896	5.87365	5.91252	4.16607	0.351651	0.333308	1.48242	1.42388	6.64891	6.47528	1.74515	6.14633	9.54613	9.80176	11.4294	12.0994	3.99067	2.91423	3.18103	5.00782	7.18903	6.71331	29.0002	0.595745	-0.543149	2.20067	2.06364
cluster5	2.88039	2.76554	0.671058	0.67318	3.5597	3.7793	3.72149	4.08183	3.15647	3.78091	5.10001	5.11748	4.17561	0.304844	0.304842	1.29475	1.28244	5.996	5.55607	1.52782	5.26939	8.87463	9.0293	10.1199	10.5816	3.09733	2.45642	2.92691	3.67431	6.48338	6.67036	27.9431	0.623939	-0.364614	2.34947	2.28994
cluster5	2.49709	2.57413	0.659132	0.709094	3.72297	4.04807	3.50987	3.89155	3.72867	4.01858	4.32171	4.42453	3.8447	0.291149	0.282477	1.29931	1.3866	6.23595	5.81859	1.47745	5.46253	9.22083	8.81183	11.1277	11.1321	3.71456	2.4561	2.9681	3.6512	5.99794	6.51787	28.8859	0.61451	-0.196875	3.02922	2.93073
cluster5	3.20163	2.73626	0.831252	0.813229	4.05879	4.67982	3.28209	4.06936	3.87748	4.18813	6.03031	6.12378	4.21445	0.356558	0.35882	1.70949	1.60092	7.01905	6.56336	1.80386	5.95479	11.118	10.3144	12.8011	12.7921	3.97882	3.15363	3.24813	4.31918	8.16841	7.63857	28.1002	1.47759	0.349813	1.87143	2.50156
cluster4	2.75351	2.46754	0.68076	0.624345	4.22496	4.64198	4.21994	4.62785	4.19854	4.39428	5.61703	5.46631	4.17412	0.339346	0.34415	1.41295	1.2882	7.43394	7.08751	1.97528	6.05079	10.2166	10.2566	12.0444	12.5019	4.15411	3.01954	3.37394	4.3443	7.42374	7.60207	27.9431	-0.786944	2.19011	2.40494	2.53252
cluster5	3.05377	2.7664	0.790911	0.751909	4.27938	4.71616	3.59384	4.13009	3.72226	4.244	5.59883	5.5215	4.07725	0.336656	0.341391	1.58576	1.49161	6.79472	6.50402	1.72662	5.51488	9.84459	9.76884	11.3663	11.7574	3.85188	3.11796	3.3577	4.41416	7.68277	7.69296	28.9145	1.03308	0.796916	2.4045	2.44602
cluster3	3.21533	2.98836	0.817045	0.836127	3.61765	4.34033	4.11786	4.33388	3.82677	4.31054	5.69546	5.58237	4.49043	0.34003	0.347434	1.52579	1.52498	6.46036	5.87448	1.82987	4.92194	10.211	9.26018	11.5144	11.6667	3.43915	2.59611	3.10301	4.24265	6.86061	6.61142	28.9716	0.628654	-0.227195	2.32184	1.76224
cluster5	2.71668	2.61599	0.749958	0.771992	3.95783	4.06287	3.47443	3.91519	3.37659	4.10693	4.78915	4.95859	4.04242	0.343623	0.333552	1.3549	1.33167	6.62857	6.3356	1.62738	4.99859	9.84581	9.35081	11.4088	11.6755	3.32289	2.65869	3.03943	4.25168	6.6009	6.85759	29.0002	0.633368	-0.237302	3.2869	2.91205
cluster5	3.07082	2.68131	0.715371	0.666338	3.91355	4.0711	3.9395	4.24455	3.71112	3.92197	4.79566	4.86809	3.59531	0.282965	0.292754	1.36835	1.27661	5.93116	5.64752	1.61101	5.36119	9.33347	8.77027	11.6928	10.8601	3.72914	2.86687	3.03898	4.31112	6.84664	6.42654	29.0002	-0.401279	-0.111365	2.60894	2.39617
cluster5	2.65625	2.59283	0.539892	0.625141	3.55088	3.89342	3.61246	3.98294	3.38527	3.7261	5.16239	5.23406	3.867	0.286688	0.289478	1.10796	1.29037	6.22209	6.48611	1.57171	5.38613	9.02688	9.19934	11.0787	10.5619	3.55027	2.75845	3.19114	4.27541	5.76731	6.05848	29.0145	0.428796	-0.758697	2.4848	2.18565
cluster5	2.77601	2.74543	0.646089	0.785102	4.03763	4.37799	3.96642	4.39147	3.57391	3.89737	4.86319	4.91855	4.13042	0.312609	0.311926	1.26337	1.4908	6.38358	6.02791	1.66748	4.96268	9.1437	8.56375	11.0673	10.109	3.54038	2.74011	3.25969	4.44464	6.51321	7.19569	28.9431	1.37641	-0.476159	3.03	2.53366
cluster5	2.88987	2.70604	0.726494	0.732671	3.61869	3.96916	3.62746	4.29065	3.45381	3.82464	5.80241	5.89629	4.34289	0.35165	0.335205	1.44594	1.42856	7.02404	6.52551	1.83785	6.0788	10.2366	11.0735	12.6467	13.0283	4.06213	2.76705	2.97271	4.79638	6.9369	7.11505	29.1573	0.659299	-0.292889	1.99749	1.70677
cluster5	2.84812	2.60776	0.620335	0.654019	3.87109	4.15937	3.72907	4.39421	3.42058	3.65397	4.72093	4.79757	3.63603	0.252426	0.25492	1.20193	1.28214	5.99034	5.70488	1.61754	5.69698	9.0039	8.71287	10.4545	10.2181	3.54095	2.65237	2.91756	4.41596	6.35391	6.6416	24.8716	-0.667048	0.0654496	2.44901	1.75061
cluster3	3.16524	2.87967	0.856368	0.794267	4.57045	4.48507	4.51088	4.6552	3.66173	4.02429	6.46567	6.79001	4.73524	0.341059	0.32994	1.7419	1.54745	6.59841	6.15002	1.90238	5.901	9.11233	8.82702	10.821	11.4813	3.89096	3.00771	3.23352	5.10764	8.09313	7.97405	28.0716	0.0808021	-0.374113	1.69183	2.27793
cluster5	2.89748	2.7144	0.785461	0.761586	4.56264	4.64412	4.6036	4.42306	3.74451	4.08358	5.30175	5.39343	4.09729	0.31813	0.307622	1.43424	1.42434	5.9421	6.13187	1.67614	5.72269	9.47523	8.88671	11.6157	10.2893	3.81206	2.65593	3.05781	4.51694	6.95621	6.6815	28.9859	0.631011	-0.232248	2.07095	2.06473
cluster3	3.04032	2.82528	0.81577	0.777217	4.48765	4.25654	3.85246	4.17086	3.78356	4.45922	5.6998	5.7512	4.19384	0.323485	0.321531	1.5556	1.40731	6.92726	6.60743	1.7488	6.31731	10.6531	10.355	12.4696	12.4423	3.66663	2.83344	3.20905	4.39939	7.71159	7.32968	26.8859	0.990745	-0.527909	2.11997	2.06861
cluster5	2.69584	2.57177	0.701735	0.722152	4.17845	3.92665	4.24594	4.15575	3.39682	3.99128	5.42023	5.66621	4.0004	0.30973	0.308435	1.50946	1.52478	6.38963	5.93251	1.83002	5.60568	10.1511	9.54151	11.8414	11.3757	3.43536	2.6543	3.00588	4.50588	6.87949	6.87992	27.9859	-0.215519	-0.5291	2.25482	2.46483
cluster5	2.90381	2.78189	0.76496	0.803678	4.68373	4.86377	5.17314	5.14079	3.59387	4.24722	5.61772	5.70589	4.26907	0.381142	0.363649	1.47631	1.4478	6.08518	5.77703	1.99568	5.67939	9.97802	9.51402	12.3385	11.5492	3.76819	2.53971	2.90974	4.70272	7.0754	7.36024	23.9002	0.692114	-0.561748	2.74492	1.76709
cluster3	3.10418	2.92446	0.736358	0.715053	4.11929	4.41272	4.24808	4.49984	3.35502	3.8204	6.14685	5.86599	3.80069	0.351396	0.373774	1.43874	1.32919	6.7117	6.33136	1.94411	5.17685	10.1158	9.21267	11.5979	11.2282	3.26111	2.88237	3.22498	4.85253	7.30293	7.16315	29.0002	0.445251	1.90003	2.04921	1.95376
cluster5	2.99178	2.75158	0.719679	0.741198	4.09347	4.27833	3.52006	3.98208	3.79755	4.11117	5.7304	5.79139	4.15055	0.352576	0.352876	1.4675	1.56061	6.5868	6.38492	1.9543	6.08504	10.9379	10.032	13.9915	12.9281	3.67942	2.6825	3.13181	4.47179	7.3695	7.11867	29.043	0.640441	0.236893	2.14183	2.18686
cluster4	3.13273	2.56813	0.762777	0.627855	3.8889	4.28337	3.92568	4.47843	3.48959	3.85891	5.55342	5.5384	4.21701	0.315603	0.3363	1.39442	1.23677	6.56303	6.17669	1.73431	5.24975	9.36653	8.9469	10.7695	11.2995	3.60223	2.78358	2.91272	4.60347	6.97612	6.47908	28.9002	-0.963322	0.18128	2.17623	1.88076
cluster5	2.94569	2.8107	0.71672	0.720019	4.05741	3.97745	4.17382	4.18393	3.89831	4.47086	6.28107	6.32255	4.43929	0.332853	0.329397	1.40072	1.39845	6.34935	6.22743	1.63284	5.93347	9.90331	9.1662	11.0115	10.9157	3.9566	2.6869	3.13113	4.81406	6.56698	6.9134	29.0145	-1.09496	0.234406	2.60082	2.59137
cluster5	2.54677	2.57461	0.596879	0.681669	4.44135	4.55143	4.60508	4.32002	4.36883	4.62496	4.69812	4.79469	3.76929	0.318979	0.299553	1.3171	1.38504	6.65034	6.41299	1.7618	5.65373	10.538	9.56999	12.3072	11.7938	3.87461	2.67763	3.05496	4.33468	6.83885	7.23152	25.9288	0.621582	-0.212035	2.14625	1.79124
cluster5	2.7179	2.57679	0.659842	0.675754	3.78391	4.02484	3.67356	3.91321	3.5933	4.19039	4.79231	4.77626	3.93045	0.277134	0.272858	1.28313	1.24326	5.83926	5.52434	1.80817	4.43965	8.41406	8.05432	10.5013	9.56169	3.05899	2.40633	2.7387	3.72062	6.10509	6.08129	24.9859	1.5716	-0.415757	2.74324	2.32973
cluster3	2.93899	2.82411	0.755382	0.758433	4.18254	4.5289	3.76388	4.27551	3.76047	4.21969	5.81296	5.97091	4.47705	0.361678	0.361966	1.39358	1.41356	6.72613	6.25222	1.78021	5.00694	10.7164	9.34595	12.0584	11.2119	3.50711	2.79062	3.12856	5.25111	6.90331	7.10885	28.1002	0.988482	-0.0837698	2.10779	1.81199
cluster5	2.27099	2.59665	0.550284	0.704396	4.25485	4.18781	4.22969	4.46328	3.47911	3.75044	4.65728	5.00826	4.08493	0.322169	0.300451	1.16226	1.45528	6.26753	6.34282	1.91699	5.44754	9.15425	9.65228	11.6989	11.7202	3.46427	2.65291	3.26197	4.39641	6.34817	7.21179	26.8002	1.65382	0.945288	2.60754	2.46496
cluster4	2.73639	2.3936	0.669999	0.602911	3.96172	4.53991	3.83667	4.14821	3.71486	4.29504	5.34622	5.27349	3.89654	0.333132	0.337786	1.27689	1.13991	6.40516	6.13832	1.65565	5.34039	10.0726	9.40153	12.5864	12.2246	3.77331	2.66446	3.0393	4.33232	7.14264	6.64897	28.9573	0.626296	-0.222142	2.3888	2.07518
cluster3	3.00471	2.8587	0.782891	0.780018	3.53288	4.23104	3.72353	3.84912	3.70684	4.05385	5.30174	5.53186	4.25472	0.341015	0.330225	1.47453	1.47296	6.02461	6.05596	1.63129	6.64691	9.32014	9.22821	11.9121	11.4097	3.88417	2.7209	3.17523	3.80749	6.80455	6.41063	26.0002	1.1601	-0.778831	3.13919	3.44297
cluster4	2.58555	2.47452	0.609345	0.602518	4.18661	4.16743	3.69574	4.59482	3.55612	3.74923	4.25625	4.32805	3.86374	0.26376	0.256188	1.21692	1.24827	6.46856	6.14716	1.56348	4.69213	9.33429	9.63665	11.2315	12.119	3.06338	2.56427	2.99092	4.71613	5.96247	6.4511	27.9716	1.3435	-0.35673	2.68002	2.04838
cluster5	2.74891	2.5746	0.737023	0.743365	4.22691	4.37838	4.15934	4.45378	3.60931	3.93846	4.6148	4.82235	3.77544	0.312013	0.299483	1.30508	1.30904	6.28107	6.29991	1.58992	5.25396	9.21301	9.3501	11.1853	10.7354	3.36292	2.50837	2.91578	4.29046	6.5028	6.54419	24.9573	0.682732	0.026134	2.41218	3.13813
cluster5	2.82599	2.63439	0.717636	0.734232	3.78635	3.92171	3.81246	3.85891	3.63526	4.04351	5.2944	5.70176	4.27157	0.331828	0.321419	1.27847	1.22973	5.55921	5.75171	1.52372	5.34477	9.43023	9.79865	11.706	11.4843	3.49746	2.41021	2.84257	4.42619	6.39936	6.26717	27.0573	-0.109673	-0.680303	2.24726	1.51276
cluster5	3.16382	2.80451	0.734238	0.718278	4.00899	4.11743	4.00178	4.08888	3.39934	3.86741	5.21842	5.41799	4.18959	0.333513	0.329785	1.41271	1.40672	6.58515	6.47356	1.78988	5.594	9.90136	10.4271	11.3094	11.7417	3.54771	2.84508	3.02389	4.86012	6.77355	6.80734	28.9573	0.588673	-0.384061	2.2749	2.10551
cluster4	2.87564	2.57019	0.655959	0.623039	4.15582	3.88228	4.66141	4.38728	3.75046	4.069	4.01199	4.1635	3.66105	0.280456	0.274607	1.28714	1.20431	5.72136	5.25897	1.57992	5.13982	9.27146	9.04188	10.2625	10.4539	3.51157	2.51882	2.86728	4.41613	7.02184	7.32305	28.8002	0.600365	-0.166555	3.05744	2.16422
cluster5	2.89157	2.74132	0.671122	0.676302	4.49704	4.5689	4.73035	4.65523	3.69827	4.10761	5.73483	5.79045	4.39479	0.352378	0.362969	1.30029	1.18613	6.7283	6.24455	1.80085	5.00855	9.50447	9.38569	11.1873	11.0141	3.09898	2.83655	3.24306	4.58739	6.43289	6.368	27.8002	-0.0204231	0.675424	3.01811	2.19942
cluster4	2.67075	2.51505	0.64569	0.670995	4.07865	4.28586	4.03217	4.31569	3.49314	3.71923	5.21481	5.35441	3.9141	0.31101	0.314623	1.29117	1.31592	6.18132	5.65206	1.75396	5.31627	9.2213	8.84965	10.4548	11.0709	3.56753	2.69958	2.93714	3.94203	6.31124	6.84818	26.9431	-1.21961	-0.692051	2.42692	1.95286
cluster4	2.70946	2.54064	0.522424	0.600667	3.67482	4.3278	3.35175	3.94312	3.83761	4.23373	5.31541	5.4006	4.13476	0.326257	0.296672	1.02645	1.21266	5.76707	6.20867	1.67145	5.32531	8.69417	9.32973	11.1345	10.9276	3.83213	2.47595	2.99799	4.07773	5.71189	6.08473	27.9431	0.623939	-0.217088	2.8215	3.33543
cluster5	2.79513	2.75154	0.687271	0.71193	3.92339	4.0044	3.68889	4.03745	3.6673	4.0806	4.98984	5.22822	3.98977	0.295883	0.290844	1.40674	1.39872	5.70809	5.8125	1.55572	4.82183	8.94779	8.55942	11.2487	11.1391	3.51712	2.63871	3.18484	4.33506	7.18214	7.36705	27.9716	-0.744606	0.650765	3.14423	2.61001
cluster5	2.82035	2.62497	0.735832	0.714387	3.98922	4.15215	4.18196	4.35953	3.57047	4.11348	4.89915	5.09882	4.03719	0.297367	0.322341	1.44336	1.36107	6.50655	6.43514	1.76092	6.38881	9.98344	9.72823	12.4024	12.3706	4.25914	2.95335	3.20922	4.6916	7.05999	6.99606	27.0145	-0.718722	1.40922	2.74321	1.69872
cluster5	2.69497	2.61134	0.691503	0.708059	3.90148	3.75596	4.10289	4.26707	4.12292	4.48234	4.84566	4.83164	3.52432	0.331102	0.320905	1.44899	1.44108	6.46554	6.08889	1.59684	5.24012	9.43863	9.5142	10.6644	10.4195	3.43471	2.92511	3.13407	4.31269	6.74636	6.94035	26.8859	1.21649	-0.38578	2.63144	2.18851
cluster5	2.79413	2.61539	0.615717	0.641209	3.28256	3.7785	3.26955	3.88504	3.21978	3.71305	4.56964	4.62241	4.29792	0.286029	0.272017	1.16493	1.17732	5.12209	5.05873	1.50493	4.69768	7.72162	8.00031	9.68575	9.30033	3.12853	2.63059	3.07734	3.64203	5.67046	5.70263	28.7288	1.69847	0.0979921	4.06924	2.72904
cluster5	2.70439	2.59732	0.711023	0.728994	4.14131	4.32632	3.70281	4.24665	3.80216	4.10212	4.55441	4.64367	3.87109	0.303506	0.296569	1.41469	1.42806	6.07554	6.14121	1.81005	5.42727	9.64254	9.49718	11.756	10.8517	3.59568	2.53041	2.90363	4.6626	6.68342	6.73113	27.9145	0.826154	-0.726921	3.19607	2.12459
cluster5	2.72721	2.56906	0.710842	0.686085	3.8667	4.00399	4.14255	4.18314	3.462	3.89153	4.80622	5.05238	4.03024	0.292533	0.286485	1.28313	1.27366	5.99006	5.93615	1.49604	5.71918	8.54284	9.19142	10.1608	10.576	3.55593	2.56145	3.01179	3.78682	6.57169	6.40094	26.8002	-0.0956702	0.621451	3.0059	2.16787
cluster4	2.58868	2.47557	0.586749	0.575735	3.18663	3.78016	3.58953	3.79329	3.90089	4.3737	4.76122	4.88381	3.84208	0.248349	0.281721	1.19844	1.17839	6.0141	5.75062	1.37644	5.70358	8.97067	8.48587	10.9565	11.0931	3.68387	2.60872	2.98518	3.62711	6.08218	6.30371	25.9859	0.631011	-0.232248	2.77303	2.13604
cluster4	2.58326	2.45485	0.610714	0.615719	4.04987	4.07362	4.06877	4.22385	3.42154	3.84283	4.82441	4.86336	4.30578	0.272594	0.292501	1.19085	1.21406	5.38197	5.33957	1.54085	5.20724	8.2445	8.2399	11.1645	10.0406	3.40966	2.509	2.81563	4.04382	6.4324	6.29225	28.0288	0.638083	-0.247408	2.99803	2.87404
cluster5	2.81303	2.7294	0.733085	0.743471	3.65566	3.91202	3.84703	3.84436	3.62789	4.2145	5.51974	5.48744	3.95257	0.261271	0.273592	1.44502	1.41887	6.47838	5.65696	1.61551	5.37189	9.80048	10.0212	12.1145	12.4244	3.4035	2.65951	3.10221	4.03907	6.38839	6.99488	29.0288	0.638083	-0.247408	2.71225	2.4137
cluster5	3.05955	2.81852	0.740202	0.695824	4.0019	4.08834	3.95162	4.16064	3.58899	3.95983	5.70571	5.9064	4.38081	0.313822	0.354547	1.39909	1.32821	6.68693	6.42241	1.65057	5.65577	8.7854	8.5557	11.1368	10.9242	4.04387	3.0075	3.3784	4.27886	6.73341	6.55571	27.043	0.640441	-0.252462	2.33134	2.28731
cluster2	2.51552	2.35262	0.517798	0.538547	3.50233	3.71624	4.24784	3.79729	3.40236	4.02922	4.59133	4.52063	3.72854	0.254766	0.263306	0.942759	1.11356	5.24729	5.23745	1.39949	4.78192	8.36089	8.15987	11.0559	9.69289	3.37475	2.2589	2.6679	3.64766	4.73345	5.42647	27.0002	0.633368	-0.237302	3.26478	2.5124
cluster5	3.04429	2.63954	0.713361	0.633579	3.85275	3.86225	3.43053	3.76215	3.91675	4.47648	5.15074	5.14171	3.90047	0.291567	0.318721	1.38424	1.21101	6.18659	6.05353	1.47894	4.7218	9.82436	9.4049	12.3341	11.4626	3.51438	2.73302	3.08458	4.04425	6.33275	6.04801	25.9573	0.626296	-0.222142	2.79609	2.14316
cluster5	2.94676	2.7917	0.736099	0.739926	3.9762	4.53576	4.3831	4.57354	4.01334	4.10175	5.11375	5.00874	4.15759	0.270562	0.324511	1.41247	1.4292	6.65485	5.91835	1.57836	5.2861	10.9552	10.0292	13.8402	12.6375	3.46733	2.73626	3.01884	4.93305	6.72358	6.6138	28.043	0.640441	-0.252462	2.90319	2.6553
cluster5	2.79148	2.67368	0.699877	0.664157	3.76068	3.93874	3.92631	4.10129	3.64044	4.0055	5.54731	5.61732	4.00242	0.287875	0.337934	1.34143	1.28402	6.67371	6.69715	1.51668	5.91067	9.70465	9.87067	12.4225	12.1819	4.13527	2.50677	2.9539	4.28914	6.0323	6.41196	27.0145	0.635726	-0.242355	2.3339	3.27689
cluster4	2.66041	2.46478	0.574321	0.602646	3.81525	4.15351	3.92627	3.95074	3.34493	3.72491	5.41876	5.24792	4.32185	0.258902	0.285831	1.14631	1.17549	6.14974	5.93881	1.65809	4.82908	9.43197	9.25787	12.1682	12.1437	3.47915	2.61086	2.99972	4.38943	5.96746	6.46364	29.0145	0.635726	-0.242355	2.7108	2.68476
cluster5	2.84585	2.63028	0.701522	0.696095	3.71194	4.25168	3.42589	4.06589	3.45957	3.86103	5.1855	5.02961	4.05985	0.281872	0.313624	1.3938	1.33118	6.4161	6.3839	1.65023	5.0968	9.22658	10.184	10.9195	11.3052	3.40405	2.71037	2.97446	4.6117	6.67197	6.83903	26.0002	0.633368	-0.237302	2.6022	2.51492
cluster5	2.75085	2.62707	0.655647	0.657935	3.92923	4.55815	4.21377	4.50442	3.70237	3.76374	5.44674	5.09339	3.69679	0.2833	0.31999	1.22057	1.19021	5.9138	5.76162	1.52334	5.37388	9.29552	8.51351	11.4649	10.3305	3.12383	2.45521	2.99284	4.15507	6.12792	6.13794	27.9288	0.621582	-0.212035	2.97916	2.37485
cluster3	3.01197	2.86842	0.719416	0.707124	3.56083	3.50711	3.51737	3.66012	3.74516	4.09548	5.04149	5.1593	3.7074	0.286574	0.299329	1.35703	1.38317	6.45974	6.43597	1.33472	5.25758	10.2841	10.1026	12.2787	11.9396	3.6606	2.7217	3.15485	4.36823	6.56631	6.12901	28.0573	0.642798	-0.257515	2.85126	3.23948
cluster3	3.17163	2.86759	0.805099	0.745086	3.98671	4.02054	3.65844	4.18131	3.63436	4.12251	4.76917	4.72538	4.05344	0.312418	0.329306	1.62354	1.55227	7.09074	6.62199	1.73837	6.02226	10.7503	9.51086	12.5139	12.288	3.91917	3.13353	3.41385	4.33392	7.73796	7.09156	28.0288	0.638083	-0.247408	2.2656	2.88214
cluster5	2.81617	2.62107	0.711993	0.720723	3.74506	3.90526	3.96772	4.14537	3.834	4.38854	4.92777	4.85865	3.86753	0.267507	0.289909	1.46003	1.40894	6.87491	6.14893	1.50711	5.28487	10.6956	9.67542	12.3237	11.896	3.40713	2.80179	3.07162	4.17366	6.94138	6.72779	26.0145	0.635726	-0.242355	3.19821	1.97927
cluster5	2.71769	2.5766	0.711438	0.710349	4.13965	4.31162	3.94682	4.39385	3.44345	3.89081	5.48839	5.97947	4.01216	0.314544	0.320518	1.35157	1.3855	6.86042	6.34802	1.60319	5.17404	10.0726	9.77025	12.8794	11.5817	3.50636	2.80984	3.12946	4.55027	6.82693	7.51618	28.0288	0.638083	-0.247408	2.2983	2.36347
cluster3	2.93675	2.83211	0.642017	0.726063	4.05258	4.54401	3.85724	4.30198	3.93262	4.19344	5.41829	5.36665	3.93135	0.305703	0.320125	1.28813	1.44111	6.40462	6.74087	1.69225	5.28581	10.1697	9.3381	12.3766	11.5831	3.86491	2.79489	3.33964	3.86966	6.40336	6.80319	28.043	0.640441	-0.252462	2.61403	2.58944
cluster4	2.70873	2.54369	0.698715	0.726671	4.71282	4.71558	4.15046	4.30747	3.73537	4.11249	4.8239	4.91702	3.60465	0.328947	0.336562	1.43919	1.48161	6.66584	6.2532	1.60918	5.68554	10.034	10.1061	12.1016	11.674	3.62407	2.75642	3.05802	4.73205	6.95892	7.14107	26.0288	0.638083	-0.247408	2.73896	2.30977
cluster3	3.29247	3.03084	0.799864	0.743582	4.24097	4.10246	3.75559	4.29426	3.56565	3.90175	5.53535	5.53257	4.17486	0.323826	0.335271	1.48755	1.44255	7.23581	6.69756	1.87085	5.93917	10.4761	9.5528	12.3383	12.6503	3.77695	2.96388	3.23821	4.90735	6.9394	6.93948	27.0716	0.645155	-0.262569	2.55161	3.2549
cluster5	2.87375	2.70577	0.690447	0.684696	4.02763	4.09666	3.54781	4.30837	3.6542	3.83204	5.16553	5.139	3.89178	0.349204	0.330084	1.42735	1.40477	7.07963	6.20529	1.72377	5.42436	10.2883	9.7544	13.0593	12.8419	3.49797	2.94269	3.22719	4.89157	6.45633	7.11235	27.9859	0.631011	-0.232248	2.13035	2.37307
cluster5	2.89932	2.63275	0.696694	0.659065	4.39341	4.58394	3.64264	4.14322	3.82273	4.00644	5.44515	5.36501	4.34049	0.35055	0.346711	1.34026	1.3604	6.53586	6.05905	1.71537	5.52557	9.25374	8.91359	11.5808	10.8248	3.60219	2.81911	3.13531	4.08653	6.70067	6.5813	26.9573	0.626296	-0.222142	2.39877	2.31103
cluster4	2.6819	2.52433	0.637866	0.626404	3.88719	4.07522	3.9372	4.04012	3.27389	3.83107	4.4818	4.54731	4.09536	0.29665	0.292668	1.22379	1.19839	5.71592	5.82428	1.51033	5.35238	8.37184	8.78976	11.6738	10.7383	3.36497	2.59582	3.05181	3.79052	5.79242	6.18812	27.9573	0.626296	-0.222142	2.68166	2.08842
cluster5	2.74502	2.5993	0.682214	0.699572	3.98244	4.16738	3.74983	4.10477	3.33518	3.85841	5.41921	5.55587	4.13715	0.33719	0.335263	1.3267	1.35885	6.15936	6.14602	1.66608	5.72666	9.41546	10.0794	11.7664	11.5998	3.32785	2.55628	2.95643	4.39055	6.44364	6.67426	27.0002	0.633368	-0.237302	2.56169	1.97906
cluster5	2.94281	2.72067	0.741459	0.689782	3.69465	3.89184	3.61939	4.0415	3.51196	3.92911	5.47888	5.51866	4.25103	0.331057	0.33103	1.3534	1.28915	6.24059	6.03844	1.82814	5.30318	9.37046	9.43087	11.788	11.1541	3.72956	2.72371	3.06769	4.47556	6.81442	6.74493	28.043	0.640441	-0.252462	2.10597	2.3235
cluster5	2.82393	2.73053	0.706975	0.761181	3.96473	3.98713	3.73092	3.84124	3.51396	3.88341	5.94362	6.00838	4.57791	0.319262	0.32703	1.35132	1.47929	6.28442	6.60794	1.81369	5.37545	9.25452	9.73592	12.1022	11.4822	3.6062	2.69113	3.25599	4.31829	6.14385	6.64588	27.9859	0.631011	-0.232248	2.70199	2.97308
cluster5	2.83929	2.57856	0.759766	0.722385	3.59652	4.3222	3.74229	4.14657	3.63176	4.2033	4.46361	4.32704	3.61655	0.320385	0.316737	1.45982	1.42642	6.81547	6.36532	1.61455	5.16374	9.71091	10.2398	11.2727	11.9522	3.49327	2.7716	2.99183	4.07806	6.82727	7.19852	27.9288	0.621582	-0.212035	2.66097	1.64099
cluster5	2.70717	2.67402	0.658413	0.711806	3.74958	4.56407	3.69915	4.43147	3.49013	4.13575	5.4911	5.67525	4.25727	0.323701	0.317037	1.4038	1.49468	6.77641	6.35099	1.84478	4.58402	9.62413	9.63693	11.3357	12.0628	3.51962	2.58289	3.10724	4.52997	6.50337	7.51425	27.0573	0.642798	-0.257515	2.24174	2.53635
cluster5	3.06133	2.70155	0.778494	0.746476	3.70043	4.01569	3.74521	4.57295	3.90212	4.0567	5.63246	5.82556	4.46102	0.324359	0.31818	1.47908	1.31205	5.9285	5.76359	1.47311	5.06785	9.26725	9.09786	11.187	11.0705	3.65297	2.67189	2.74565	4.52624	6.54176	5.95154	28.143	0.656942	-0.287835	2.32994	2.25577
cluster5	2.77958	2.58823	0.703996	0.660219	4.26102	4.78109	4.3732	5.03021	3.63623	4.35747	4.65061	4.77157	3.73521	0.348839	0.320035	1.42752	1.30295	6.92205	7.01053	1.77723	5.73779	10.1334	9.57962	11.9506	11.5532	3.84467	2.89527	3.21926	4.47392	7.16564	6.74716	27.0716	0.645155	-0.262569	2.5974	2.50433
cluster5	2.79508	2.57136	0.714432	0.702111	3.86058	4.03774	3.62732	4.33981	3.59076	4.0282	5.4684	5.39318	4.03969	0.299072	0.30778	1.449	1.38674	6.27084	6.23053	1.8505	5.62112	10.2517	9.93706	13.1164	12.694	3.54414	2.60142	3.00508	4.79586	7.15393	7.37508	29.0859	0.647513	-0.267622	2.54548	2.18851
cluster3	2.87592	2.91501	0.735826	0.755687	4.08217	4.41168	4.33696	4.6839	3.6025	3.94019	5.7764	5.71403	4.21809	0.329021	0.335856	1.49523	1.42213	6.95554	6.90659	1.78078	6.45658	10.6148	10.5059	12.616	12.5578	3.99149	2.87022	3.18329	4.57303	7.28005	6.78924	29.1573	0.659299	-0.292889	2.36574	2.23813
cluster3	3.21357	2.95662	0.802622	0.799323	4.29976	4.58037	3.55518	4.19019	4.01335	4.16727	5.84372	5.66999	4.53579	0.353433	0.37519	1.59003	1.56967	6.93359	6.99653	1.96131	5.63607	10.1067	10.1932	12.7469	12.1981	3.77008	3.13453	3.54121	4.69554	7.53968	7.31513	27.9859	0.631011	-0.232248	2.33294	1.91028
cluster5	2.854	2.66704	0.657401	0.66021	4.10671	4.22298	3.98522	4.15656	3.64454	3.91981	5.16224	5.00444	3.99964	0.301583	0.307313	1.31774	1.30244	6.17335	6.11225	1.71919	5.72281	9.54595	8.97491	12.3126	11.6226	3.9135	2.6934	3.05995	4.46375	6.57376	6.51141	27.9002	0.616867	-0.201928	3.02563	2.61876
cluster3	3.04183	2.86871	0.701155	0.701563	4.06688	4.37239	3.81272	4.10907	3.44193	3.62371	5.79423	5.76953	4.56319	0.314828	0.328041	1.45318	1.44932	6.63297	6.22112	1.57654	5.04545	9.66003	8.99519	11.5713	11.5327	3.58031	2.93287	3.3119	4.00409	6.69401	6.87277	26.9859	0.631011	-0.232248	2.35841	2.2628
cluster3	3.09176	2.90341	0.825514	0.821875	3.85931	3.92966	3.90895	4.13405	3.834	3.93911	5.49658	5.52589	4.30454	0.300773	0.333911	1.60804	1.59904	6.97646	7.23499	1.82744	6.21719	10.1259	10.0927	11.8975	11.1422	4.17301	3.15701	3.42583	4.1293	7.48224	7.17187	27.0002	0.633368	-0.237302	2.34841	2.54738
cluster5	2.91979	2.80388	0.642897	0.674549	4.28094	4.36033	4.24557	4.33868	3.36009	3.80675	5.78963	5.7518	4.35129	0.301646	0.309953	1.31636	1.28103	5.79392	5.27899	1.68805	5.33047	8.94997	8.6463	12.066	11.9909	3.38662	2.77225	3.14247	4.69786	6.41804	6.36163	28.0716	0.645155	-0.262569	2.51452	1.781
cluster3	3.17372	2.94684	0.83485	0.811381	4.63835	4.60927	3.8254	4.34518	3.96024	4.35745	6.63816	6.70432	4.71877	0.358297	0.363637	1.65776	1.68238	7.07433	6.84268	1.99354	6.06985	10.6278	10.7587	13.273	13.1697	3.81536	3.16318	3.46661	4.90122	7.45737	7.48958	27.1859	0.664014	-0.302995	1.89148	1.95332
cluster4	2.58907	2.37695	0.628225	0.607108	3.3108	3.46717	3.29284	3.62914	3.6355	3.94395	4.49618	4.39222	3.80275	0.267377	0.286217	1.33657	1.25411	5.94337	5.68789	1.53472	4.95479	8.63058	8.62502	10.6681	10.8343	3.19214	2.61353	3.00906	4.11115	6.2136	6.35203	27.9716	0.628654	-0.227195	2.76964	2.00919
cluster5	2.80374	2.57794	0.67988	0.665849	4.30934	4.5436	4.24511	4.10023	3.30985	3.94411	4.80399	5.01803	3.95436	0.275342	0.294112	1.37316	1.32264	6.36183	5.91055	1.57555	4.60215	9.30586	9.42341	11.5716	11.688	3.14607	2.81837	3.08939	3.97255	6.58042	6.46334	26.9145	0.619224	-0.206982	3.239	2.21917
cluster5	3.01662	2.75216	0.737366	0.705791	3.76405	4.45341	3.81412	4.05935	3.71775	4.11548	4.81025	5.37958	4.06936	0.303251	0.323676	1.37527	1.31126	6.29915	5.93256	1.68017	5.33566	9.65704	9.17542	11.3511	11.3294	3.49986	2.46818	2.88462	4.5125	6.43244	6.27627	29.1573	0.659299	-0.292889	2.7264	2.79459
cluster5	2.73013	2.76587	0.635669	0.668141	3.99698	4.72742	4.08542	4.61608	3.67327	3.96079	4.65009	5.20572	3.63971	0.31425	0.317982	1.27982	1.34415	6.22735	6.0019	1.90662	5.51671	9.48916	9.38445	11.938	11.8758	3.6318	2.31454	2.97447	4.65425	7.09008	6.96163	27.9288	0.621582	-0.212035	2.68543	2.02885
cluster4	2.8262	2.55076	0.622045	0.604106	4.19306	4.20636	3.74304	4.20873	3.29066	3.86851	5.07598	5.60082	4.08993	0.289278	0.311661	1.26098	1.16905	6.3258	6.15308	1.75928	4.84887	9.88696	9.58644	11.76	11.7588	2.9837	2.59088	2.87032	3.64013	7.15429	6.44842	29.0002	0.633368	-0.237302	2.33294	2.44981
cluster5	3.11571	2.75775	0.732418	0.622082	4.03948	4.39179	3.80917	3.84505	3.56428	4.24735	5.16174	5.59487	4.26163	0.306343	0.293555	1.31582	1.11279	6.13745	5.17845	1.61545	4.56264	8.89187	8.14298	10.9507	9.94637	2.79618	2.54189	2.76268	4.01756	6.34984	5.64081	27.9859	0.631011	-0.232248	2.39707	2.41164
cluster3	2.91907	2.91627	0.742648	0.740629	3.81846	4.21178	3.46181	3.71419	3.50182	3.78121	5.59406	5.80815	4.45549	0.297095	0.317195	1.35109	1.37187	6.18483	6.17681	1.50869	4.50378	9.44116	9.19999	10.6402	11.0034	3.3832	2.70811	3.19838	3.35014	6.74865	6.82018	29.0145	0.635726	-0.242355	2.7835	3.38782
cluster5	2.84995	2.7916	0.738297	0.716347	4.43221	4.35423	3.92397	4.01253	3.69564	3.98227	4.92754	5.10868	4.0049	0.301784	0.307242	1.4072	1.38618	6.74082	6.26794	1.71243	5.52098	10.7221	9.62069	12.4418	12.1989	3.68672	2.77562	3.12493	4.58419	7.63049	7.15835	28.0288	0.638083	-0.247408	2.27913	2.24377
cluster4	2.39445	2.42635	0.521148	0.545607	3.92792	3.90481	4.02817	4.25928	3.49912	3.81886	4.26364	4.23759	3.92529	0.280708	0.266103	1.08106	1.2546	5.74261	5.82452	1.47185	5.24238	8.54827	9.88961	10.6595	11.521	3.29125	2.38583	3.0075	3.98771	5.96148	6.75132	28.9002	0.616867	-0.201928	3.35892	2.49421
cluster3	3.31749	3.22189	0.772353	0.770592	4.26467	4.3222	3.98711	4.43734	3.45249	3.92141	6.28675	6.40796	4.69465	0.352602	0.351712	1.47417	1.37695	6.58613	6.43658	1.83093	5.6126	9.90616	9.24435	12.1986	11.7201	3.83142	2.68329	3.02556	4.96813	7.24949	7.13689	25.1573	0.659299	-0.292889	1.92743	2.13132
cluster3	3.05873	2.85728	0.759188	0.716547	4.59282	4.41123	4.02606	4.32851	3.77482	4.20362	5.06945	5.12824	3.83733	0.309452	0.326952	1.51236	1.50742	6.2591	5.95696	1.6797	5.23166	8.82412	8.73435	10.0376	10.6613	3.6259	2.82571	3.12561	4.62912	7.13218	6.89769	26.0716	0.645155	-0.262569	2.01674	2.07327
cluster3	3.3686	3.0892	0.866562	0.847672	4.34258	4.36311	4.35083	4.39076	3.85132	4.18423	5.32511	5.41674	4.40578	0.338086	0.324163	1.60684	1.54667	6.43851	6.55857	1.73215	5.52339	10.5605	10.0083	12.8585	12.5573	3.77369	3.01953	3.29618	3.86328	7.30246	7.23052	29.0145	0.635726	-0.242355	2.76369	2.52452
cluster4	2.67983	2.54714	0.656335	0.663041	3.91427	3.673	4.11513	3.98084	3.59384	3.88023	4.28903	4.59485	4.05267	0.280964	0.286564	1.25413	1.35253	5.67961	5.32393	1.67309	4.71108	9.45744	8.31124	11.308	11.4152	2.95902	2.58576	3.09165	3.68926	6.87585	6.96944	28.0573	0.642798	-0.257515	2.84094	2.55017
cluster3	3.06809	2.94288	0.762905	0.746606	3.65646	3.92172	3.40245	3.85483	3.49088	3.7541	5.68695	5.83973	4.37088	0.321987	0.318652	1.38892	1.34505	6.6795	6.53312	1.6405	5.47985	10.1369	9.82965	12.2145	12.3953	3.30756	2.67149	2.94724	4.12563	6.40157	6.44108	28.1287	0.654585	-0.282782	2.0505	2.03271
cluster3	3.23479	2.94241	0.803263	0.726293	3.9945	4.27126	3.6495	3.94206	3.75146	4.11676	5.49572	5.69006	4.41837	0.315178	0.318883	1.39163	1.27876	6.57457	5.78305	1.61911	5.0397	9.29197	8.76308	11.0991	10.2741	3.05302	2.71034	2.95702	3.98975	6.24597	6.02131	25.0288	0.638083	-0.247408	2.18225	2.36301
cluster4	2.57219	2.4898	0.663889	0.699297	3.97467	4.12948	4.1141	4.48197	3.65728	4.06263	5.39334	5.53989	4.46027	0.300305	0.297368	1.3405	1.34812	5.61842	5.81504	1.75264	5.71304	8.52465	9.00428	10.4595	10.395	3.69197	2.49855	2.81189	4.47086	6.50701	6.91494	29.0716	0.645155	-0.262569	2.11738	2.13421
cluster4	2.45975	2.34926	0.639274	0.618	3.62723	3.89497	3.29666	3.99181	3.73609	3.96713	4.58725	4.82564	4.06944	0.303223	0.299647	1.14003	1.09467	5.57188	5.32778	1.53383	5.97677	9.26642	8.78176	11.0778	10.94	3.96603	2.43309	2.67214	4.40402	6.30093	6.03336	29.0002	0.633368	-0.237302	2.79927	2.10164
cluster5	2.95525	2.78869	0.762028	0.754461	4.32008	4.19301	4.51145	4.32606	3.55843	4.00287	5.35042	5.50123	4.40119	0.31967	0.319708	1.49735	1.48882	6.76072	6.48594	1.82943	5.84414	10.3174	10.0753	12.1466	11.5203	3.99635	2.77296	3.17558	4.68309	7.46116	7.68196	27.043	0.640441	-0.252462	2.19138	2.35475
cluster5	2.88916	2.774	0.704083	0.727579	4.05842	4.22519	3.80905	4.72596	3.55552	3.94403	5.16218	5.283	4.43519	0.31793	0.324361	1.34034	1.44877	6.18915	6.09551	1.84677	5.55645	9.50257	9.29903	11.9672	11.9986	3.617	2.68861	3.17311	4.73209	6.52008	7.08876	27.9288	0.621582	-0.212035	2.725	2.60548
cluster5	2.91776	2.72338	0.734335	0.7207	3.90054	4.2531	4.06108	4.49939	3.72322	4.17257	5.39813	5.43152	4.01462	0.309971	0.323178	1.39241	1.31448	6.95419	6.94983	1.82466	5.64136	11.2044	10.6295	13.2	12.978	3.94519	2.73864	3.15627	4.69764	6.91905	7.40308	29.0859	0.647513	-0.267622	2.09851	2.5136
cluster3	3.06643	2.87179	0.752835	0.769449	4.63609	4.72336	3.95866	4.47567	3.76658	4.27903	5.92868	6.00119	4.3301	0.346714	0.350966	1.52896	1.57666	6.77683	6.67349	1.66898	5.39107	10.816	10.2156	12.4164	12.5259	3.59893	2.78409	3.14745	4.9153	6.78871	7.28146	29.243	0.673444	-0.323209	2.47156	3.3738
cluster3	3.32667	3.16027	0.862373	0.814913	4.04008	4.29301	3.96568	4.07998	3.76667	4.17565	5.6771	5.64232	4.14631	0.332099	0.32075	1.63233	1.52481	7.40177	6.95772	1.51319	5.91907	10.7956	11.0224	12.9601	13.9249	4.21884	3.15269	3.28831	4.09881	7.67261	7.72772	29.143	0.656942	-0.287835	1.97769	2.215
cluster5	2.93962	2.7686	0.7339	0.736894	3.92204	4.46184	3.52424	4.11726	3.78829	4.50867	6.04267	6.15878	4.18727	0.321572	0.338897	1.42108	1.46415	7.06302	6.68652	1.72005	5.024	9.46569	9.31392	10.991	11.4375	3.4442	2.81002	3.27633	4.14666	6.72394	6.97742	29.0573	0.642798	-0.257515	2.0829	2.21752
cluster4	2.70985	2.48112	0.700505	0.739074	3.86136	4.13435	3.5683	3.87416	3.32133	3.75819	4.87729	4.70959	4.08709	0.294387	0.289339	1.37225	1.39171	6.62559	5.7861	1.51765	5.32447	9.19225	8.09252	10.7841	9.39529	3.16296	2.63142	2.85076	4.09491	6.02109	6.24425	26.9859	0.631011	-0.232248	2.26304	1.98389
cluster3	3.29918	2.9359	0.791627	0.793915	4.33702	4.66213	4.12405	4.1716	4.08159	4.29184	6.44568	6.0568	4.38036	0.348369	0.352546	1.56585	1.56343	7.17586	7.03408	1.92143	5.85311	11.7228	11.0445	14.0239	13.1877	4.49543	3.07179	3.25779	4.96797	7.32555	7.46868	28.2002	0.666372	-0.308049	2.40239	2.0459
cluster3	3.31269	3.17927	0.859802	0.936183	4.36236	4.52048	3.66134	4.04668	3.98662	4.37863	6.65469	6.59409	4.65239	0.37242	0.377906	1.60323	1.72319	6.62211	6.34872	1.66237	4.97614	9.26869	9.84683	11.9195	11.8023	3.64448	2.81162	3.24299	5.26789	6.87054	6.94687	29.4572	0.708804	-0.399009	1.60883	1.93097
cluster5	2.84439	2.73835	0.678466	0.711426	4.63882	4.48111	4.05445	4.45561	3.82042	4.18211	6.09394	5.89474	4.15947	0.354907	0.364765	1.42492	1.52451	7.24011	7.20901	1.87812	5.48145	10.4908	10.8265	13.3461	12.8988	3.69441	2.91611	3.20798	4.82115	6.9281	6.98647	29.4572	0.708804	-0.399009	1.76042	1.83446
cluster3	3.08137	2.83185	0.853356	0.805323	4.9712	5.2447	4.52955	5.00472	4.17269	4.323	7.35043	7.30847	4.9923	0.367655	0.393865	1.65068	1.51951	6.49562	6.04943	1.97473	5.81545	10.1693	9.60582	12.5066	12.5796	4.00688	2.68579	2.91137	5.44586	7.21393	6.73348	29.4572	0.708804	-0.399009	1.44454	1.91632
cluster3	3.24856	3.11032	0.82006	0.816205	4.65554	4.64094	3.73299	4.63811	4.08126	4.30851	6.35452	6.23526	4.28739	0.326812	0.328295	1.60338	1.5701	7.12913	6.88492	1.71826	5.92808	11.291	11.1832	12.9527	13.2188	4.22104	3.03848	3.2518	5.07845	7.63747	7.83894	28.4572	0.708804	-0.399009	2.15785	2.41598
cluster3	2.97505	2.83279	0.728404	0.772676	4.07645	4.73134	3.77385	4.21881	3.94471	4.42402	5.49349	5.58653	4.29472	0.357808	0.334362	1.50153	1.63756	6.62846	7.01168	1.62659	5.51404	10.1087	9.94045	12.3102	11.4781	4.04162	2.77255	3.18186	4.2142	6.85136	6.9853	29.4572	0.708804	-0.399009	2.31982	2.0031
cluster5	2.89903	2.80803	0.774855	0.772832	4.41638	4.13147	3.90763	4.33643	3.80112	4.17366	6.07572	6.09958	4.25032	0.361125	0.388325	1.55656	1.47819	6.91259	6.54658	1.80684	5.8956	10.3566	9.98268	12.1272	12.0595	3.56646	2.72296	3.04525	5.15408	6.85179	6.94924	27.4572	0.708804	-0.399009	1.95642	1.82895
cluster3	3.17286	3.01048	0.832393	0.854056	4.60967	4.78584	3.92806	4.88703	4.41428	4.63667	6.41162	6.40714	4.10916	0.390581	0.385699	1.6849	1.62726	7.92001	7.69562	2.06007	6.5076	11.4859	11.4818	13.8063	13.5812	4.28096	2.91106	3.16213	5.4507	7.86319	8.10999	29.4572	0.708804	-0.399009	1.40625	1.94096
cluster3	3.45362	3.46518	0.858661	0.859497	4.89739	4.94203	4.29621	5.06542	4.20773	4.29064	6.62722	6.70584	4.71379	0.389498	0.402797	1.64807	1.5985	7.60657	7.26917	2.29835	6.4097	11.6131	10.9167	14.9637	13.6887	4.22675	3.07048	3.31086	4.91088	8.62175	8.1237	28.2144	0.668729	-0.313102	1.83889	1.91141
cluster3	3.11519	2.93	0.749256	0.741031	4.13747	4.22388	4.07881	4.54949	3.89333	4.3851	5.80129	5.81265	4.37519	0.357595	0.371924	1.53683	1.5359	7.01185	6.60937	2.03816	5.88655	10.5651	9.99991	12.5152	11.8346	3.87634	3.01729	3.29257	4.82966	7.56022	7.9483	27.9288	0.621582	-0.212035	3.24695	2.41006
cluster5	2.86724	2.67877	0.767873	0.747963	3.95549	3.94624	4.55342	4.62815	3.80656	4.07971	4.94758	4.93153	3.80757	0.361868	0.372494	1.56139	1.58291	7.64561	7.06117	2.04696	5.18212	10.9339	10.0474	12.2752	12.1054	3.90361	3.01725	3.39412	4.81303	7.46421	7.65589	27.9859	0.631011	-0.232248	2.5879	2.40381
cluster3	2.99959	2.83545	0.748821	0.753629	4.67813	4.68951	4.47951	4.64045	3.65773	4.15445	5.77418	5.87013	3.94672	0.362311	0.379831	1.53164	1.45939	6.40368	6.33485	2.32916	6.23358	9.93324	9.82732	13.1983	12.8622	3.87497	2.85877	3.24092	4.76039	7.60012	7.09256	26.9716	0.628654	-0.227195	2.39056	1.70998
cluster5	3.13757	2.71962	0.745509	0.665972	3.6473	3.44099	3.94355	3.88291	3.94422	4.20029	5.36599	5.19611	3.87178	0.330559	0.371505	1.39774	1.26025	6.0757	6.07459	1.75157	5.34847	9.72046	9.57894	11.7129	12.3832	3.53665	2.79971	3.36906	3.58602	7.12818	7.12073	28.9288	0.621582	-0.212035	3.16263	1.88153
cluster3	2.98483	2.87863	0.769155	0.786397	4.05278	4.30815	4.32196	4.47586	3.46526	3.90338	6.0683	6.06907	4.31859	0.337921	0.33939	1.50945	1.52368	7.07804	7.02741	1.97497	5.69897	10.4073	9.53331	11.8948	10.935	3.78045	2.90721	3.32727	4.67917	7.65945	7.5679	28.9431	0.623939	-0.217088	2.20831	2.01537
cluster5	3.02995	2.72943	0.734184	0.722534	4.50066	4.44999	4.51723	4.85762	4.01959	4.4791	5.48326	5.57583	3.68094	0.356857	0.345655	1.44576	1.43941	6.45242	6.1319	1.85943	6.33619	10.6074	9.64938	12.747	11.7689	3.91098	2.9123	3.15984	4.74797	7.41474	7.10695	28.9859	0.631011	-0.232248	2.63741	1.87151
cluster3	3.05457	2.86268	0.826681	0.793327	4.02186	4.22994	3.92311	4.05997	3.59622	4.35533	5.65803	5.93223	4.05588	0.343584	0.35247	1.48698	1.42645	6.4024	6.25971	1.78191	6.67157	9.92061	9.15274	11.2743	10.5489	4.29113	2.68809	3.22126	4.23981	7.12615	7.02472	27.043	0.640441	-0.252462	2.833	1.93554
cluster3	3.31052	3.05502	0.752988	0.754745	4.24844	4.01592	4.2232	4.29768	4.48146	4.66424	5.48869	5.56692	3.96513	0.342822	0.351679	1.32785	1.39838	6.32976	5.82876	2.10204	7.25109	10.3475	9.2512	13.8156	12.7135	3.97666	2.7771	3.06158	4.70169	7.36902	7.20484	27.0288	0.638083	-0.247408	1.96716	1.76174
cluster3	2.91059	2.93939	0.687318	0.696813	4.33523	4.12929	4.20121	4.11524	3.11266	3.70817	4.38809	4.49531	3.81137	0.285018	0.286552	1.29965	1.32239	5.68283	5.42403	1.73929	4.68258	9.07584	8.36621	10.0647	9.99858	3.12693	2.64818	2.87899	4.96067	6.77381	6.47175	29.0288	0.638083	-0.247408	2.69581	2.00205
cluster5	2.803	2.6801	0.662367	0.688319	3.65969	4.08603	3.31208	3.8213	3.54604	3.73764	5.19406	5.21676	4.11702	0.323163	0.332082	1.31254	1.30877	6.10176	6.11022	1.65627	6.59734	9.25368	9.12554	11.1387	10.9991	3.96083	2.62537	2.93324	4.32415	7.23159	6.92671	28.043	0.640441	-0.252462	2.25469	2.50804
cluster4	2.54143	2.42431	0.608223	0.663839	3.83376	3.80851	3.90018	3.72703	3.42551	3.83021	4.82433	4.63665	4.18645	0.276479	0.282995	1.10031	1.25164	5.82028	5.8589	1.41907	4.58186	7.86652	8.26925	9.93446	9.17478	3.00167	2.4177	2.94352	3.63162	5.68411	6.49893	26.8431	0.607437	-0.181715	2.84928	2.84517
cluster3	3.06898	2.91427	0.793448	0.765846	5.07761	5.54863	4.39282	4.94132	4.10008	4.55556	5.67994	5.58284	4.26793	0.348157	0.34871	1.50387	1.4551	6.07995	6.54222	1.83955	6.01031	9.6114	9.75024	13.3015	12.4446	3.61454	2.6279	3.14607	5.11356	7.42703	8.11634	26.0716	0.645155	-0.262569	2.36139	1.9486
cluster3	3.25004	2.87046	0.749629	0.714448	3.70243	3.97223	3.58652	3.91879	3.42976	3.95248	6.22342	6.20147	4.55622	0.300082	0.298757	1.50305	1.37135	6.07256	5.76609	1.50587	6.37802	9.20459	9.3125	11.4121	11.4872	3.56405	2.97277	3.05619	3.95289	6.63774	6.46867	26.9859	0.631011	-0.232248	2.11812	2.47998
[truncated: 24 more rows]

## Sheet: SingleCase_analysis_UNNORMLSED
Clusters	RH_Hippocampus	LH_Hippocampus	RH_Amygdala	LH_Amygdala	RH_MiddleCingulate_Gyrus	LH_MiddleCingulate_Gyrus	RH_AnteriorCingulate_Gyrus	LH_AnteriorCingulate_Gyrus	RH_PosteriorCingulate_Gyrus	LH_PosteriorCingulate_Gyrus	RH_Thalamusproper	LH_Thalamusproper	RH_BasalForeBrain	LH_Angangular_Gyrus	RH_Ententorhinal	LH_Ententorhinal	RH_InferiOroccipital_Gyrus	RH_InferiorTemporal_Gyrus	RH_MiddleTemporal_Gyrus	LH_MiddleTemporal_Gyrus	RH_Parahippocampal_Gyrus	LH_Parahippocampal_Gyrus	LH_Precentral_Gyrus	LH_PlanumTemporale	RH_SuperiorTemporal_Gyrus	LH_SuperiorTemporal_Gyrus	RH_TemporalPole	3rd_Ventricle	4th_Ventricle
[truncated: 198 more rows]
